# Supplementary material
Source: MDPI journal article supplement (https://www.mdpi.com/2076-3417/13/10/6349)
Supplement: s1 [file s1]

Archive with 7 entries (7 files):
- Annexes A-F.pdf
- CropYieldDataset.csv
- DataProcessing/CL_AGRIPRO_20220509_154326.csv
- DataProcessing/CountryCodes.csv
- DataProcessing/Eurostat_DistrictYield_Clean.py
- DataProcessing/NUTS2_ChangeCompilation_1999-2021.xlsx
- DataProcessing/NUTS2021.xlsx
