# Supplementary material
Source: MDPI journal article supplement (https://www.mdpi.com/2076-3417/13/10/6349)
Supplement: s1 [file s1 › CropYieldDataset.csv]

Crop ID	Area ID	2000	2001	2002	2003	2004	2005	2006	2007	2008	2009	2010	2011	2012	2013	2014	2015	2016	2017	2018	2019	2020	2021	2022
C0000	AL	3.17	3.03	3.29	3.19	3.47	3.46	3.55	3.73	4.08	4.31		4.75	4.88		4.89	4.88	4.72		4.84	5.04	5.21
C0000	AT	5.41	5.86	5.84	5.27	6.52	6.15	5.74	5.87	6.83	6.16	5.93	7.07	6.01	5.85	7.06	6.18	7.23	6.25	6.14	6.95	7.38	7.11
C0000	AT1	4.43	5.33	4.92	4.45	5.85	5.25	5.08	4.71	6	5.24	5.22	6.21	4.77	5.43	6.2	5.42	6.63	4.98	5.28	6.03	6.41
C0000	AT11	4.48	4.91	4.75	4.32	5.51	5.22	5.21	4.88	6.06	4.94	5.26	5.88	5.42	4.4	5.91	4.97	6.22	4.91	5.07	5.74	6.04
C0000	AT12	4.42	5.43	4.96	4.48	5.93	5.26	5.05	4.67	6	5.31	5.22	6.29	4.63	5.66	6.27	5.53	6.72	5	5.33	6.09	6.5
C0000	AT13	3.79	4.46	4.38	4.24	5.67	3.88	4.62	4.08	5	4.33	4.22	5.49	3.3	5.16	5.06	4.98	6.24	4.15	4.52	5.48	5.55
C0000	AT2	8.41	7.69	8.88	7.48	8.63	9.42	8.25	9.19	9.91	9.14	8.54	9.93	9.58	7.11	9.66	9.04	9.68	9.8	8.65	9.53	10.33
C0000	AT21	7.53	6.47	7.78	6.58	7.16	7.5	5.82	7.55	8.63	8.09	6.32	8.4	8.4	5.77	8.74	8.58	9.17	9.2	7.68	8.48	9.26
C0000	AT22	8.74	8.16	9.3	7.82	9.15	10.13	9.16	9.82	10.39	9.54	9.4	10.52	10.02	7.62	10.01	9.23	9.9	10.04	9.04	9.95	10.77
C0000	AT3	6.25	6.19	6.54	6.21	7.09	6.73	6.1	7.15	7.29	6.98	6.41	7.74	7.38	6.39	7.93	6.64	7.49	7.63	7.1	8.01	8.4
C0000	AT31	6.28	6.21	6.57	6.23	7.12	6.76	6.12	7.19	7.32	7	6.44	7.77	7.41	6.41	7.96	6.66	7.53	7.67	7.13	8.05	8.43
C0000	AT32	4	4.39	4.12	4.29	4.44	4.27	3.86	4.62	4.6	4.64	4.18	5.52	4.4	4.73	5.6	5.22	4.98	4.73	5.15	5.43	5.94
C0000	AT33	5.09	5.09	4.8	5	5.62	3.12	3.86	4.25	5	4.38	4.52	4.84	4.74	5.4	4.66	5.2	3.96	4.96	5.15	5.01	5.19
C0000	AT34	6.5	6.5	4.5	5	4.5	4	4	5	5.5	5.5	5.18	5.76	5.39	4.8	4.64	4	4.19	4.4	4.41	3.96	4.41
C0000	BA	2.57	3.17	3.84	2.53	4.45	4.27	4.33	3.24	4.42	4.52	4.31	3.73	3	4.06	3.77	3.82	5.35	3.75	5.55	5.42	6.12	4.49
C0000	BE	9.01	9.49	9.54	9.95	10.48	9.98	9.69	9.6	10.64	9.18	12.02	8.54	8.28	8.85	9.16	9.17	6.61	8.65	7.98	8.99	8.43	7.98
C0000	BE2	8.47	8.66	8.66	8.88	9.44	9	8.55	8.62	9.29	9.9	9.51		8.89	9.64	9.98	9.99	7.29	9.62	8.07	9.59	8.91
C0000	BE21	9.12	9.04	9.45	8.37	9.84	9.77	6.95	8.6	9.13	9.25	9.21	9.12	8.58	8.86	10.34	9.42	5.3	10.19	5.49	9.01	7.9
C0000	BE22	8.28	8.55	8.39	8.18	9	8.66	7.62	8.52	9.03	9.61	8.83	9.22	9.5	9.64	9.91	9.71	6.47	9.07	7.76	9	8.29
C0000	BE23	8.83	9.18	9.01	9.39	9.82	9.63	9.16	8.99	9.56	10.45	9.91	9.8	8.72	9.98	10.35	10.31	7.4	9.9	7.83	9.69	9.1
C0000	BE24	8.31	8.82	8.36	8.5	9.17	8.51	8.49	8.42	8.98	9.74	9.02	8.82	8.9	9.5	9.93	9.57	7.13	9.44	8.07	9.46	8.91
C0000	BE25	8.26	8.13	8.56	9.27	9.45	8.9	9.01	8.55	9.47	9.93	9.96	9.44	8.81	9.68	9.69	10.3	8.08	9.7	8.91	10.02	9.32
C0000	BE3	7.6	7.84	7.73	7.75	8.19	7.75	7.59	7.35	7.94	8.6	7.91		7.79	8.27	8.57	8.59	6.13	7.97	7.92	8.59	8.1
C0000	BE31	8.12	8.62	8.1	8.05	8.12	7.99	8.25	7.92	8.28	8.84	8.41	7.4	8	8.69	9.09	9.06	6.67	8.7	8.17	9.01	8.8
C0000	BE32	7.75	7.62	7.72	8.08	8.55	8.04	7.69	7.29	8.15	8.95	8.32	8.33	8.22	8.58	8.75	9.05	6.31	8.4	8.31	9.1	8.45
C0000	BE33	8.05	8.86	8.3	8.3	8.79	8.19	8.09	7.87	8.32	8.87	8.13	8.4	8.06	8.83	9.13	8.92	6.38	8.37	8.22	8.94	8.83
C0000	BE34	5.25	5.43	5.29	5.35	5.05	5.15	5.17	4.78	5.67	5.92	5.11	5.59	5.47	5.77	5.95	5.8	4.39	5.39	5.51	5.81	5.31
C0000	BE35	7.38	7.59	7.73	7.38	8.11	7.53	7.3	7.29	7.65	8.39	7.46	7.54	7.33	7.8	8.35	8.23	5.91	7.39	7.67	8.16	7.56
C0000	BG	2.62	2.9	3.16	2.37	4.08	3.39	3.57	2.14	4.21	3.61	4.11	4.36	3.78	4.67	4.93	4.75	4.92	5.63	5.56	5.78	4.37	5.95
C0000	BG3								2.08			4.27	4.5	3.94	4.94	5.18	5.01	5.17	5.92	5.84	6.05	4.41
C0000	BG31								1.56			4.67	4.55	3.7	4.92	5.55	5.17	5.09	5.87	6.12	6.24	5.69
C0000	BG32								2.16			4.59	4.8	4.04	5.62	5.44	5.6	5.48	6.47	6.25	6.99	5.16
C0000	BG33								2.24			4.58	4.84	4.37	5.34	5.44	5.09	5.58	6.41	6.24	5.81	2.98
C0000	BG34								2.39			3.03	3.59	3.56	3.69	4.07	3.94	4.32	4.71	4.3	4.84	3.36
C0000	BG4								2.53			3.14	3.39	2.81	3.16	3.45	3.15	3.48	3.74	3.76	3.95	4.17
C0000	BG41			2.04	2.33				2.39			2.84	3.08	2.43	2.88	3.24	2.91	3.33	3.26	3.45	3.82	3.68
C0000	BG42								2.59			3.26	3.5	2.98	3.29	3.55	3.27	3.54	3.96	3.91	4.01	4.41
C0000	CH							6.19	6.42	6.57	6.58	6.17	6.77	6.37				5.22	6.88	6.29	6.66	7.07	6.39
C0000	CH01																5.04	5.19	6.86	6.29	6.68	7.13
C0000	CH02																4.99	5.07	6.78	6.21	6.54	6.89
C0000	CH03																5.08	5.25	6.89	6.31	6.67	7.08
C0000	CH04																5.17	5.46	7.04	6.43	6.84	7.26
C0000	CH05																5.13	5.4	7.03	6.34	6.76	7.19
C0000	CH06																5.05	5.28	7.02	6.34	6.75	7.14
C0000	CH07																6.16	7.15	8.12	7.37	8.1	8.58
C0000	CY		2.28	2.46	2.26							2		2.4			2.68				2.56	2.28
C0000	CZ	3.91	4.52	4.33	3.95	5.46	4.75	4.17	4.53	5.37	5.08	4.7	5.6	4.53	5.32	6.23	5.89	6.33	5.5	5.21	5.65	6.04	6.11
C0000	CZ01	4.15	4.99	4.75	4.46	6.07	5.34	4.61	4.67	5.92	5.68	5.13	6.09	4.85	5.81	6.78	6.8	6.84	6.07	5.46	5.86	6.09
C0000	CZ02	3.88	4.68	4.42	4.11	5.63	4.89	4.38	4.66	5.56	5.25	4.84	5.7	4.64	5.44	6.43	6.19	6.48	5.81	5.28	5.75	6.04
C0000	CZ03	3.76	4.07	4.04	3.53	5.16	4.38	3.75	4.41	4.88	4.57	4.3	5.12	4.38	4.89	5.86	5.4	5.76	5.2	5.18	5.48	5.86
C0000	CZ04	3.42	3.95	4.25	4.08	5.57	4.74	4.26	4.48	5.44	5.16	4.83	5.57	4.6	5.45	6.44	6.2	6.45	5.77	5.27	5.69	5.9
C0000	CZ05	4.15	4.54	4.33	4.03	5.49	4.76	4.19	4.68	5.41	5.17	4.73	5.62	4.74	5.31	6.34	5.99	6.37	5.78	5.22	5.71	6.02
C0000	CZ06	3.7	4.81	4.37	3.87	5.39	4.78	4.12	4.34	5.37	5.06	4.71	5.68	4.24	5.37	6.05	5.64	6.42	5.06	5.1	5.61	6.23
C0000	CZ07	4.63	4.97	4.72	4.38	5.74	5.1	4.56	4.79	5.8	5.52	5.02	6.06	4.93	5.63	6.6	6.32	6.66	5.88	5.31	5.8	6.16
C0000	CZ08	4.06	4.05	4.24	3.88	5.27	4.64	4.06	4.46	5.18	4.91	4.53	5.41	4.51	5.12	6.09	5.76	6.12	5.42	5.18	5.53	5.82
C0000	DE	6.45	7.06	6.25	5.76	7.36	6.72	6.49	6.18	7.12	7.2	6.68	6.45	6.96	7.31	8.05	7.49	7.18	7.26	6.18	6.95	7.13	6.99
C0000	DE1	6.62	6.48	6.51	5.66	7.12	6.35		6.59	6.98	7.15	6.79	7.04	7.06	7.1	8.03	6.93	6.65	7.73	7.24	7.55	7.36
C0000	DE11				5.46
C0000	DE12				5.41
C0000	DE13				5.9
C0000	DE14				5.95
C0000	DE2	6.3	6.35	6.11	5.34	7.3	6.19	6.13	6.58	6.72	6.7	6.23	6.65	6.8	6.86	7.92	7.17	7.22	7.44	6.77	7.24	7.53
C0000	DE21				5.9
C0000	DE22				6.18
C0000	DE23				4.86
C0000	DE24				4.5
C0000	DE25				4.29
C0000	DE26				4.96
C0000	DE27				5.95
C0000	DE4	4.26	5.8	4.82	3.27	5.98	5.23	4.67	4.42	5.09	5.62	5.06	4.16	5.07	5.85	6.38	5.75	5.52	5.29	4.04	4.71	5.4
C0000	DE7	6.57	6.98	6.34	6.13	7.57	6.54	6.84	6.41	7.32	7.18	7.06	6.65	6.11	7.49	7.56	7.26	6.91	7.05	6.28	7.24	6.92
C0000	DE71				6.16
C0000	DE72				5.9
C0000	DE73				6.24
C0000	DE9	6.85	7.65	6.32	6.4	7.53	7.42	6.98	6.17	7.64	7.65	7.1	7.02	7.37	7.91	8.33	8.21	7.66	7.64	6.15	7.22	7.19
C0000	DE91				6.66
C0000	DE92				6.69
C0000	DE93				5.78
C0000	DE94				6.48
C0000	DEA	7.38	8.38	7.58	7.25	8.02	7.88	7.32	6.76	8.3	8.32	7.37	7.83	8.26	8.61	8.89	8.55	7.83	7.91	7.35	7.79	7.96
C0000	DEA1				7.46
C0000	DEA2				7.8
C0000	DEA3				7.26
C0000	DEA4				6.8
C0000	DEA5				7.39
C0000	DEB	5.89	5.74	5.82	5.28	6.64	5.69	6.24	5.47	6.59	6.74	6.48	5.55	6.2	7.04	6.74	6.85	6.29	6.51	6.87	6.9	6.76
C0000	DEB1				5.45
C0000	DEB2				5.27
C0000	DEB3				5.1
C0000	DED	5.92	6.69	5.61	4.49	7.31	6.57	5.67	6.22	6.67	6.64	6.43	6.08	6.62	6.35	8.07	7.32	7.55	7.04	6.03	6.69	7.01
C0000	DED2				4.09
C0000	DEE	6.44	7.17	5.95	5.68	7.55	6.65	6.42	6.08	7.43	7.45	6.94	5.91	6.98	7.19	8.07	6.86	7.72	6.84	5.29	5.7	6.31
C0000	DK01							5.98	5.78	6.15	6.71	5.95	5.61	6.63	6.47	6.95	6.99	6.41	7.26	4.31	7.2	7.27
C0000	DK02							6.63	6.44	6.93	7.8	6.55	6.34	7.27	7.34	7.68	7.85	6.99	7.55	5.13	7.92	7.71
C0000	DK03							5.75	5.54	5.82	6.66	5.96	5.65	6.18	6.24	6.63	6.64	6.02	6.78	4.88	6.7	6.77
C0000	DK04							8.87	8.94	8.76	10.31	5.57	5.77	5.92	5.83	6.37	6.48	5.87	6.62	4.83	6.65	6.73
C0000	DK05							5.47	5.5	5.89	6.53	5.25	5.65	5.68	5.8	6.17	6.43	5.89	6.52	4.85	6.55	6.54
C0000	EE	2.12	2.04	2.02	1.92	2.33	2.69	2.21	3.01	2.79	2.76	2.46	2.6	3.41	3.14	3.67	4.38	2.66	3.97	2.62	4.46	4.41	3.5
C0000	EL	3.63	3.22	3.4	3.49	3.75	3.58	3.72	3.74	4.65	4.36	4.54	5.18	4.55	4.63	4.41	3.74	4.03	3.59	3.8	4.05	4.2	3.88
C0000	EL1								3.8	4.5	4.19	4.19	5.11	4.47	5.03	4.89
C0000	EL2								5.19		6.01	4.51	4.91	5.24	4.76	5.66
C0000	EL3	1.81									1.75	2.34	4.53	1.93		2.15	3.98	3.91	4.22		1.96	3.84
C0000	EL4										1.97	1.92	3.86	2.12
C0000	EL41	1.54				1.6	1.56	1.65	1.63		2.57	1.98	2.3	2.08					1.6
C0000	EL41_42								1.4	1.42	1.85	1.88	3.17	1.96	1.62	1.6
C0000	EL42												3.45	1.93			1.53
C0000	EL43	1.93	1.57	1.68	1.69	2.47	2.24	2.21	2.23	1.89	3.78	3.96	8.16	3.21
C0000	EL5	3.34	2.99	3.17	3.26	3.5	3.4	3.47	3.51	4.37	4.12	4.65	5.26	4.33	4.57	4.58	3.81	4.07	3.77	3.99	4.63	4.74
C0000	EL51	4.11	3.77	3.88	4.08	4.3	4.25	4.24	4.46	5.24	5.17	4.8	6.89	5.35	5.85	5.57	5.52	5.2	5.55	4.78	6.1	5.68
C0000	EL52	3.08	2.72	2.88	2.93	3.15	3.07	3.24	3.33	4.15	3.78	4.36	4.64	4.03	4.49	4.53	3.28	3.66	3.11	3.97	4.44	4.54
C0000	EL53	2.78	2.49	2.71	2.73	3.03	2.83	2.88	2.96	3.52	3.23	4.26	4.41	3.53	3.93	3.89	3.5	3.68	3.36	3.06	3.62	4.13
C0000	EL54	6.77	6.5	6.98	7.23	7.42	7.32	6.44	7.01	7.1	7.33	9.65	7.14	7.85	7.83	7.45	7.5	7.29	6.22	6.44	6.08	6.6
C0000	EL6	4.29	3.77	3.97	4.05	4.35	4.02	4.33	4.34	5.38	5.02	4.46	5.09	5.09	5.02	4.48	3.85	4.17	3.5	3.8	3.46	3.66
C0000	EL61	4.07	3.57	3.72	3.74	4.04	3.84	4.13	4.18	5.13	4.85	4.27	5.43	5.16	5.49	5.28	4.4	4.98	4	4.42	4.01	4.31
C0000	EL62	1.89	1.62	1.78	1.66	1.96	1.85	1.98	1.98	2.13	2.22	4.09	3.78	3.2	2.3	2.32	1.18	2.12	1.57	1.45	1.52	1.47
C0000	EL63	8.72				8.97	7.83	8.65		10.29	9.72	5.53	5.97	6.21	4.97	5.39	2.69	2.73	2.15	2.35	2.19	2.43
C0000	EL64	3.61	3.11	3.24	3.29	3.61	3.15	3.64	3.59	4.46	4.22	3.64	4.38	4.62	4.6	4.49	3.89	3.93	3.76	3.86	3.43	3.31
C0000	EL65	2.26	1.89	2.02	2.03	2.42	2.36	2.35	2.38	2.52	3.46	2.59	2.65	2.71	2.98	2.42	2.53	2.42	2.4	2.54	2.32	2.45
C0000	ES	3.61	2.81	3.22	3.19	3.76	2.17	3.03	3.93	3.59	2.94	3.29	3.69	2.84	4.05	3.26	3.35	4	2.86	4.21	3.45	4.5	4.23
C0000	ES1	3.12	3.22	3.3	3.41	3.58	3.71	4.29				4.73	4.58	4.85	4.53	5.32	5.21	4.87	4.27	4.39	4.28	4.35
C0000	ES11	3.17	3.29	3.32	3.47	3.63	3.76	4.31				4.83	4.69	5.09	4.62	5.38	5.33	4.99	4.36	4.48	4.37	4.43
C0000	ES12	2.21	2.29	2.43	2.31	2.36	2.33	2.57				2.22	2.05	2.03	2.31	1.98	2.04	2.48	2.29	2.31	2.58	2.63
C0000	ES13	1.92	1.82	3.23	2	2.58	2.67	4.29				2.1	2.1	1.26	2.26	1.92	2.23	2.31	2.03	2.1	1.96	2.23
C0000	ES2	3.58	2.92	2.96	3.37	4.01	2.63	3.27				3.87	3.85	3.07	4.53	3.82	3.74	4.81	4.03	4.34	4.3	4.84
C0000	ES21	5.21	4.62	5.67	4.48	4.34	5.15	4.96				5.78	5.93	5.89	4.68	4.69	4.82	6.55	5.51	5.24	6.85	6.88
C0000	ES22	4.43	3.81	3.62	4.33	4.3	4.48	4.58				4.57	4.49	4.32	4.83	4.93	4.77	5.69	5.12	5.22	5.47	5.57
C0000	ES23	4.73	3.13	3.91	4.52	4.83	4.12	4.25				4.49	4.41	3.94	5.37	4.35	4	5.45	3.92	5.41	5.11	5.59
C0000	ES24	3.19	2.71	2.57	3	3.87	1.92	2.76				3.54	3.54	2.52	4.4	3.48	3.44	4.49	3.73	4.05	3.88	4.53
C0000	ES4	3.81	2.57	3.16	3.11	3.63	2.04	2.87				3.12	3.64	2.74	3.92	3	3.23	4.03	2.3	4.14	3.19	4.56
C0000	ES41	4	2.34	2.92	3.2	3.68	2.28	2.85				3.56	3.9	2.98	4.29	3.23	3.63	4.65	1.96	4.5	3.48	5.11
C0000	ES42	3.26	2.34	3.16	2.76	3.41	1.35	2.63				2.37	3.05	2.14	3.25	2.37	2.38	3.1	2.35	3.22	2.52	3.68
C0000	ES43	4.76	4.73	4.6	3.87	4.18	3.09	3.79				3.61	4.64	4.12	4.6	4.36	4.62	4.23	4.54	5.94	4.47	4.83
C0000	ES5	3.75	3.57	4.27	3.43	4.13	2.44	3.26				4.43	4.12	4.03	4.9	3.82	3.58	4.41	4.08	4.94	3.9	5.23
C0000	ES51	3.93	3.77	4.56	3.79	4.34	2.34	3.31				4.58	4.19	4.11	5.39	4.23	3.81	4.86	4.42	5.43	4.21	5.83
C0000	ES52	3.64	3.53	3.93	4.07	4.3	3.97	4.17				4.31	4.56	4.01	4.31	3.36	3.8	3.74	4.1	4.73	4.21	4.7
C0000	ES53	1.22	1.35	1.29	1.33	2.11	1.61	1.88				2.87	2.61	3.09	1.7	1.23	1.28	1.47	1.18	1.39	1.15	1.16
C0000	ES6	2.67	3.19	3.29	3.12	3.81	1.87	3.24				2.62	3.37	2.14	3.32	3.32	3.16	2.5	2.97	3.95	3.15	3.46
C0000	ES61	2.86	3.34	3.46	3.28	3.98	1.97	3.39				2.7	3.55	2.2	3.44	3.48	3.31	2.6	3.1	4.12	3.26	3.49
C0000	ES62					1.64		1.29				1.39		1.27							1.55	3.01
C0000	ES64
C0000	EU	5.72	5.46	5.64	5.14	5.5	5.02	4.87	4.54	5.21	5.05		5.15	4.88	5.31		5.49	5.27	5.57	5.32	5.71	5.46
C0000	EU28	4.52	4.61	4.7	4.25	5.3	4.81	4.68	4.54	5.22	5.06		5.15	4.88	5.31		5.49	5.27	5.57	5.32	5.71
C0000	FI	3.51	3.17	3.31	3.17	2.96	3.42	3.29	3.54	3.38	3.58	3.19	3.56	3.57	3.75	3.74	3.67	3.62	4	3.05	4.26	3.59	2.76
C0000	FI1	3.5	3.2	3.3	3.18	3.21	3.42	3.29	3.66	3.38	3.58	3.19	3.56	3.57	3.75	3.74	3.66	3.62	4	3.06	4.26	3.59
C0000	FI13	3.12	2.9	2.98	2.74	2.47	2.74	3.14	2.98	2.69	2.91	2.67	3.19	2.51	3.24	2.81
C0000	FI19	3.53	3.12	3.41	3.1	3.26	3.47	3.3	3.66	3.54	3.52	3.39	3.59	3.6	3.86	3.79	3.82	3.72	3.94	3.24	4.38	3.61
C0000	FI1A	2.99	2.84	3.3	2.88	2.74	3.2	3.04	3.26	2.01	2.79	3.09	3.33	2.98	3.22	3.22
C0000	FI1B	3.65	3.4	3.27	3.4	3.41	3.58	3.37	3.86	3.65	3.94	2.92	3.41	3.56	3.67	3.82	3.81	3.4	4.02	2.79	4.1	3.6
C0000	FI1C	3.65	3.4	3.27	3.4	3.41	3.58	3.37	3.86	3.65	3.94	3.15	3.74	3.9	3.87	4	3.84	3.85	4.31	2.91	4.41	3.58
C0000	FI1D											2.95	3.23	2.74	3.23	3.01	2.98	3.13	3.33	3.09	3.69	3.56
C0000	FR	7.16	6.66	7.38	6.07	7.45	6.9	6.74	6.47	7.19	7.37	7.01	6.86	7.19	7.02	7.49	7.5	5.62	7.25	6.83	7.49	6.38	7.09
C0000	FR2	7.44	6.92	7.64	6.31	7.84	7.21	6.94	6.63	7.48	7.71	7.26	6.94	7.36	7.38		7.95	5.13
C0000	FR4	7.56	6.61	7.38	5.89	7.98	7.3	6.9	6.7	7.34	7.8	7.33	7.36	7.35	6.97		7.48	5.7
C0000	FR5	6.84	6.53	7.36	6.38	7.11	6.7	6.64	6.23	6.94	7.18	6.58	6.49	7.12	6.9		7.36	6.06
C0000	FR6	6.71	6.33	7.03	5.28	6.7	6.28	6.45	6.11	6.72	6.26	6.64	6.66	6.88	5.98		6.51	6.35
C0000	FR7	7.01	6.31	6.92	4.59	6.89	6.39	6.43	6.45	6.49	6.64	6.64	6.57	6.79	6.53		6.14	6.28
C0000	FR8	4.22	3.79	4.1	3.45	4.08	3.77	3.34	3.86	3.99	3.96	4.14	4	4.24	4.46		4.05	4.39
C0000	FR9	4.06	6.61	4.76	6.38	5.05
C0000	FR91				1	1
C0000	FRA
C0000	FRA2
C0000	FRA3	4.28	7.14	5.22	7.35	5.54
C0000	FRA4	2.84	2.84	1.97	2.69	2.71			2.76	2.79	2.9	2.7	3	3	2.9
C0000	FRB													7.18	6.96	7.45	7.33	4.59	7.03	6.84	7.23	5.73
C0000	FRC													6.44	6.12	6.47	6.69	4.53	6.67	6.23	6.6	5.16
C0000	FRC1	7.07	6.13	6.83	4.78	7.19	6.37	6.15	5.78	6.45	6.86	6.36	6.07	6.39	6.08	6.28	6.71	4.45	6.55	6.31	6.51	4.95
C0000	FRC2	7.05	6.06	7.09	5.11	7.67	6.52	6.27	6.16	6.46	7.12	6.88	7.01	6.65	6.26	7.26	6.58	4.85	7.18	5.86	7.04	6.13
C0000	FRD													7.86	7.94	7.85	8.57	6.19	8.06	7.43	8.47	7.11
C0000	FRD1	6.74	6.61	7.5	7.03	7.79	7.16	7.02	6.12	7.61	7.51	7.3	7.18	7.17	7.41	7.35	7.9	5.86	7.5	6.72	7.95	6.67
C0000	FRD2	7.69	7.19	8.25	7.61	8.61	7.8	7.62	7.3	8.94	8.77	8.44	8.22	8.46	8.41	8.28	9.15	6.49	8.56	8.06	8.94	7.51
C0000	FRE													8.04	8.76	8.79	9.39	5.79	8.51	8.18	9.1	8.26
C0000	FRE1	7.81	7.82	8.28	8.48	8.92	8.19	7.91	7.16	8.8	9.05	8.6	8.91	7.85	8.74	8.75	9.67	6.3	8.87	8.57	9.45	8.75
C0000	FRE2	8.03	7.98	8.33	7.61	8.83	7.93	7.84	7.41	8.72	8.9	8.18	7.76	8.14	8.78	8.81	9.25	5.52	8.32	7.98	8.92	8.01
C0000	FRF													7.38	7.24	7.77	8	5.58	7.1	7.27	7.62	7.09
C0000	FRF1	9.85	8.61	9.35	7.82	9.58	9.39	8.48	9.4	9.73	10.05	9.07	10.45	10.61	8.85	10.28	9.34	8.42	10.32	9.59	9.63	9.46
C0000	FRF2	7.73	7.34	7.68	6.47	8.09	7.48	7.17	6.93	7.22	7.94	7.52	7.03	7.27	7.36	7.9	8.23	5.32	7.17	7.25	7.72	7.06
C0000	FRF3	6.68	5.88	6.57	5.31	7.37	6.63	6.42	5.68	6.58	7.03	6.69	6.07	6.09	6.37	6.41	7.01	4.81	5.76	6.33	6.63	6.12
C0000	FRG													7.28	6.79	7.53	7.41	5.8	7.28	6.5	7.46	5.81
C0000	FRH													6.96	7.24	7.68	7.7	6.84	7.72	7.08	7.74	7.18
C0000	FRI													7.15	6.61	7.58	7.18	6.16	7.32	6.72	7.52	6.06
C0000	FRI1	7.74	7.3	8.34	6.42	7.92	6.95	7.44	7.63	7.74	7.64	7.7	8.26	7.62	6.72	8.21	7.68	7.41	8.94	7.76	8.85	7.12
C0000	FRI2	4.81	4.6	5.13	3.85	5.28	5.1	5.18	4.37	4.77	5.45	4.89	5.16	5.06	4.91	5.81	5.46	3.65	5.25	4.41	5.15	4.1
C0000	FRI3	7.27	6.64	7.64	6.38	7.06	6.37	6.49	6.51	6.85	6.92	6.33	5.74	7.09	6.74	7.41	7.07	5.72	6.66	6.39	7.04	5.68
C0000	FRJ													6.26	5.46	5.82	5.6	5.75	5.92	4.89	6.13	4.9
C0000	FRJ1	4.08	3.61	4.03	3.48	4.08	3.62	3.38	3.74	3.8	3.76	4.07	3.79	4.13	4.55	3.97	4.02	4.12	4.47	3.69	4.3	3.98
C0000	FRJ2	6.19	5.83	6.33	4.63	6.01	5.95	5.91	5.27	6.24	5.39	6.13	5.73	6.6	5.61	6.12	5.84	6.01	6.14	5.07	6.38	5.03
C0000	FRK													6.79	6.52	7.14	6.14	6.28	6.71	6.29	6.12	5.69
C0000	FRK1	6.62	5.8	6.13	4.12	6.36	5.81	5.78	5.64	5.69	6.44	6.31	5.65	6.23	6.45	6.66	5.79	5.57	5.97	5.8	5.1	5.24
C0000	FRK2	7.26	6.66	7.44	4.92	7.25	6.79	6.87	7.01	7.04	6.79	6.88	7.22	7.19	6.58	7.51	6.41	6.82	7.3	6.67	6.92	6.06
C0000	FRL													4.32	4.31	3.94	4.04	4.62	4.45	3.9	4.12	4.09
C0000	FRM													7.34	7.32	6.98	6.61	6.56	6.93	7.22	7.02	6.74
C0000	FRY
C0000	FRY1
C0000	FRY2															7	5	7	9	9	8.5	8.5
C0000	FRY3
C0000	FRY4												3	2.9	3	2.89	2.89	2.89	2.89	2.89	2.89	2.89
C0000	FRY5																	2	2	2	2	2
C0000	HR	4.16	4.91	5.39	3.65	5.48	5.66	5.49	4.62	6.73	6.2	5.46	5.33	4.65	5.57	6.2	5.83	6.83	5.8	7.11	7.21	7.05	7.05
C0000	HR01											5.92	4.87
C0000	HR02											5.44	5.51	4.66	5.56	6.16	5.83	6.8	5.85	7.17	7.28	6.94
C0000	HR03											3.71	3.43	3.5	3.37	3.79	3.4	3.58	3.21	3.69	3.79	3.88
C0000	HR05														5.56	6.16	5.83	6.8	5.85	7.17	7.28	5.85
C0000	HR06														5.56	6.16	5.83	6.8	5.85	7.17	7.28	7.61
C0000	HU	3.63	4.88	3.96	3.04	5.59	5.53	5.1	3.49	5.79	4.72	4.73	5.11	3.76	4.83	5.88	5.23	6.47	5.82	6.29	6.36	6.66	5.9
C0000	HU1	2.95	3.96	2.8	1.91	4.64	4.78	4.61	2.61	5.48	3.79	4.06	4.61	3.08	4.21	5.37	4.78	5.53	5.22	5.94	5.79	5.88
C0000	HU11														3.98	5.35	4.72	6.09	5.54	6.36	6.29	3.87
C0000	HU12														4.24	5.38	4.78	5.46	5.19	5.89	5.74	5.9
C0000	HU2	4.06	5.07	4.85	3.55	5.79	6.18	5.71	3.66	6.26	5.55	5.42	5.55	4.02	5.13	6.61	5.76	7.07	6	6.94	6.86	7
C0000	HU21	3.84	4.75	4.2	3.02	5.43	6.1	5.52	3.31	6.21	5.12	5.12	5.63	3.76	4.96	6.11	5.56	6.81	5.52	7.02	6.43	6.4
C0000	HU22	3.54	3.72	3.96	3.38	5.18	5.23	4.83	4.04	5.51	5.19	5	5.25	4.43	4.79	6.1	5.31	6.39	5.38	5.99	6.26	6.59
C0000	HU23	4.54	6.15	5.86	4	6.41	6.87	6.41	3.63	6.74	6.08	5.89	5.68	3.93	5.45	7.26	6.22	7.71	6.79	7.56	7.6	7.73
C0000	HU3	3.41	4.85	3.4	2.76	5.53	5.08	4.65	3.45	5.47	4.17	4.19	4.79	3.62	4.67	5.36	4.86	6.08	5.74	5.81	6.06	6.47
C0000	HU31	2.69	3.97	2.63	2.52	4.83	4.59	3.94	3.08	4.9	3.66	3.64	4.34	3.68	4.33	4.96	4.61	5.64	5.59	5.3	6.15	5.98
C0000	HU32	3.62	5.1	3.4	3.05	5.74	5.2	4.67	3.36	5.93	4.28	4.07	4.89	3.85	4.76	5.59	4.68	6.39	6.29	5.98	6.29	6.86
C0000	HU33	3.5	4.97	3.69	2.59	5.62	5.17	4.89	3.68	5.27	4.25	4.5	4.89	3.4	4.71	5.28	5.13	5.98	5.29	5.86	5.81	6.31
C0000	IE	7.39	7.21	6.2	6.84	7.72	6.73	7.3	6.89	7.04	6.5	7.18	8.05	6.35	7.53	8.15	8.57	7.79	8.32	6.84	8.51	7.13	8.61
C0000	IE01											6.91	7.62	6.2	7.22	7.82	8.33	7.55
C0000	IE02											7.25	8.16	6.38	7.61	8.23	8.63	7.85
C0000	IE04														6.12	5.95	6.77	6.15	7.29	7.35	7.56	6.85
C0000	IE05														7.77	8.02	8.35	7.58	8.03	6.54	8.49	7.44
C0000	IE06														7.37	8.49	8.97	8.16	8.72	7.14	8.59	6.79
C0000	IS												2.66	3.86				3	4	2.63	2.47	2.58	2.85
C0000	IT	4.99	4.82	4.96	4.31	5.44	5.38	5.32	5.16	5.41	5.09	4.87	5.7	5.3	5.38	5.83	5.46	5.64	5.27	5.37	5.36	5.65
C0000	ITC	7.69	7.9	7.73	7.15	8.28	8.16	7.99	7.85			5.81	8.4	4.46		9.46	8.23	8.23	7.94	8.13	8.41	8.83
C0000	ITC1	6.74	6.8	6.46	6.2	7.03	6.97	7	7.11			4.36	6.6	8.02		8.88	7.92	7.82	7.45	7.55	8.4	8.69
C0000	ITC2	3	2	2								5.33	4.25	4			6.33	5.67	5.25	6.33	4.67	4
C0000	ITC3	4.58	3.93	4.29	3.31	4.27	4.4	4.5	3.22			3.17	3.25	3.23			3.26	3.3	2.84	3.27	3.19	3.19
C0000	ITC4	8.61	8.91	8.88	8.02	9.38	9.23	8.91	8.56			7.23	10.15			10.05	8.55	8.66	8.47	8.74	8.43	8.99
C0000	ITD	8.05	7.89	8.02	6.33	8.26	8.04	7.31	7.37			7.44	8.37	6.58		8.62
C0000	ITE	4.24	3.77	4.07	3.25	4.46	4.42	4.37	4.31			4.36	4.75	4.38		4.38
C0000	ITF	2.65	2.28	2.78	2.22	3.02	3.01	3.03	2.52			2.84	3.11	3.09		3.07	3.08	3.41	2.99	3.06	3.06	3.12
C0000	ITF1	4.08	4.21	4.01	3.79	4.46	4.4	4.44	3.7			4.4	4.35	3.98		4.16	4.14	4.14	4.17	3.91	4.07	4.13
C0000	ITF2	2.72	2.76	2.83	2.74	2.8	2.59	2.98	2.97			3.16	3.05	2.73		2.78	2.77	2.86	3.58	3.56	3.6	3.68
C0000	ITF3	3.31	3.28	3.72	3.22	3.66	3.75	3.71	3.34			3.33	3.69	4.01		3.24	3.98	3.86	3.57	3.91	3.63	4.02
C0000	ITF4	2.65	1.62	2.71	1.78	2.94	2.65	2.69	1.99			2.44	2.88	2.59		2.92	2.75	3.49	2.61	2.72	2.77	2.75
C0000	ITF5	1.9	1.96	2	1.7	2.57	3.08	2.83	2.55			2.57	2.82	3.41		2.94	2.95	2.93	2.71	2.74	2.74	2.74
C0000	ITF6	2.16	2.38	2.55	2.23	2.61	2.77	2.82	2.53			2.66	2.66	2.64		2.86	2.87	2.88	2.8	2.84	2.84	2.9
C0000	ITG	1.99	2.02	1.28	2.23	2.55	2.12	2.33	2.5			2.49	2.65	2.71		2.67	2.83	2.78	2.82	2.79	2.79	2.82
C0000	ITG1	2.25	2.1		2.54	2.72	2.33	2.6	2.79			2.66	2.8	2.76		2.75	2.88	2.74	2.84	2.8	2.74	2.78
C0000	ITG2	1.41	1.82	1.39	1.43	2.15	1.67	1.72	1.8			1.64	1.89	2.44		2.26	2.6	2.93	2.74	2.77	3.1	3.11
C0000	ITH																8.05	8.07	7.85	7.8	7.2	8.24
C0000	ITH1			3.5	3.5	3.5	3.5	3.5				3.7	3.95	3.59			3.73	3.73	3.73	3.73	3.77	3.52
C0000	ITH2			4	3	3.67	3	3.67	2.75			3	3.47	2.82			3.22	4.31		4.89	4.46	4.62
C0000	ITH3	9.28	9.1	8.88	6.6	9.63	9.35	7.61	8.42			8.21	8.9	6.26		10.61	8.7	8.47	8.14	8.24	7.35	9.21
C0000	ITH4	9.26	9.35	9.49	6.45	6.7	7.2	8.23	9.09			7.2	8.09	8.5		6.82	10.08	9.67	9.63	9.46	9.04	9.64
C0000	ITH5	6.66	6.37	6.71	6.05	7.38	7	6.71	5.79			6.79	7.95	6.33		7.23	7.02	7.37	7.15	7.07	6.65	7.12
C0000	ITI																4.75	4.37	3.83	4.26	4.42	4.33
C0000	ITI1	3.76	3.27	3.58	2.41	3.94	3.9	3.64	3.76			3.61	3.96	3.56		3.86	3.75	3.75	2.99	3.53	3.62	3.81
C0000	ITI2	5.34	4.96	5.19	4.46	5.7	5.79	5.8	6			6.4	6.43	6.35		6.02	6.58	5.1	4.75	5.42	5.79	5.18
C0000	ITI3	4.15	3.81	4.27	3.92	4.35	4.29	4.31	3.94			3.88	4.15	4.61		4.1	4.7	4.55	4.34	4.37	4.48	4.48
C0000	ITI4	4.15	3.43	3.66	2.49	4.5	4.11	4.23	4.04			4.11	4.45	3.36		3.76	4.22	4.54	3.77	4.22	4.22	4.07
C0000	LT	2.71	2.51	2.77	3.04	3.25	2.94	1.93	3.01	3.35	3.45	2.76	3.03	4.02	3.69	3.98	4.58	3.86	4.23	3.18	3.86	4.73	3.94
C0000	LT01														2.27	2.6	3.09	2.62	2.59	1.98	2.38	2.99
C0000	LT02														3.83	4.12	4.73	3.99	4.4	3.31	4.02	4.94
C0000	LV	2.2	2.09	2.48	2.18	2.43	2.8	2.26	2.94	3.1	3.08		2.74	3.77	3.37	3.49	4.51	3.83	4.25	3.03	4.31	4.66	3.9
C0000	ME								1.92	3.1	3.19	3.16	3.22	2.54	3.76	3.39	3.08	3.24	3.25	3.27	3.12	3.17
C0000	MK	2.56	2.27	2.9	2.41	3.59	3.2	3.21	2.78	3.52	3.38	3.32	3.47	2.82	3.36	3.88	3.03	3.82	2.78	3.69	3.51	3.63	3.54
C0000	MT
C0000	MTZ
C0000	MTZZ
C0000	NL	7.85	7.72	7.65	8.3	8.43	8.18	7.79	7.14	8.28	8.93	8.11	7.37	8.02	8.27	8.69	8.33	7.5	8.41	7.91	8.65	7.92	7.88
C0000	NL1					7.09	8.51	6.87			8.15	7.58	6.71	7.62	7.73	8.16	7.66	7.29	7.8	7.69	7.86	7.38
C0000	NL11					7.62	8.51	7.38			8.61	7.99	6.97	7.9	7.8	8.62	8.12	7.42	8.22	8	8.28	7.68
C0000	NL12					7.09	8.51	7.58			8.31	8.62	6.69	7.38	8.04	8.15	7.66	7.45	8.48	8.33	8.8	7.81
C0000	NL13					5.96	8.51	5.58			7.08	6.12	6.02	7.02	7.32	6.93	6.46	6.86	6.3	6.54	6.25	6.3
C0000	NL2					8.09	8.51	7.3			8.8	8.1	7.58	8.12	8.47	8.5	8.2	7.73	8.47	7.77	8.36	7.81
C0000	NL21					7.42	8.51	5.66			7.74	6.55	6.95	7.33	7.3	7.18	6.76	6.81	6.95	6.02	7.2	6.82
C0000	NL22					10.84	8.51	7.05			8.71	7.84	7.61	7.73	8.25	8.66	8.1	7.68	8.35	6.93	7.51	7.35
C0000	NL23					5.34	8.51	8.45			9.37	8.97	7.83	8.75	9.13	8.8	8.7	8.02	8.99	8.91	9.47	8.55
C0000	NL3					9.04	8.51	8.3			9.15	8.5	7.16	7.81	8.32	8.76	8.84	7.71	8.63	8.42	9.5	8.15
C0000	NL31					6.73	8.47	5.67			7.92	7.03	4.63	7.48	5.71	5.67	6.11	6.29	6.27	5.83	7.19	5.49
C0000	NL32					8.34	8.51	7.74			8.41	7.98	7.08	7.74	7.7	8.07	8.48	7.43	8.39	7.84	8.79	7.33
C0000	NL33					8.96	8.51	8.27			9.18	8.84	7.76	8.07	8.81	9.19	9.21	7.79	9.16	8.52	9.65	8.47
C0000	NL34					9.38	8.51	8.56			9.41	8.53	7.21	7.76	8.16	8.61	8.85	7.78	8.52	8.61	9.71	8.32
C0000	NL4					9.64	8.51	7.8			9.8	8.92	8.54	8.92	9.13	9.72	8.77	7.32	9.17	7.53	8.96	8.51
C0000	NL41					10.08	8.51	8.04			10.02	9.1	8.34	8.73	9.03	9.35	8.9	7.6	9.51	7.92	9.25	9.02
C0000	NL42					8.94	8.51	7.42			9.54	8.64	8.86	8.73	9.28	10.2	8.61	6.98	8.77	7.01	8.51	7.77
C0000	NO	3.96	3.72	3.49	3.94	4.4	4	3.67	3.86	4.36		3.96	3.39	3.65	3.33	4.31	4.75	4.6	4.51	2.62	4.65	4.68
C0000	NO02															4.29	4.75	4.85		2.93		5.26
C0000	NO03															4.52	5.23	4.63		2.28
C0000	NO04															3.81	3.2	3.73		3.18
C0000	NO06															3.82	3.17	4.01		3.54		3.33
C0000	NO07															2	1.63	2.95		1.74		2
C0000	NO08															4.41	5.26	4.82		2.14		4.78
C0000	NO09															4.41	5.26	4.82		2.14		5
C0000	NO0A															3.42	2.74	3.27		1.13		4.15
C0000	NO0B
C0000	PL	2.53	3.06	3.24	2.87	3.54	3.23	2.6	3.25	3.22	3.48	3.5	3.37	3.64	3.74	4.19	3.66	3.96	4.12	3.37	3.61	4.7	4.56
C0000	PL1	2.01	2.6	2.67	2.48	2.96	2.7	2.19	2.75	2.77	2.92	2.9	2.84	2.95	2.98	3.45	2.86	3.16
C0000	PL2	2.88	2.95	3.25	3.17	3.54	3.4	2.61	3.37	3.55	3.33	3.1	3.58	3.7	3.53	4.1	3.55	4.11	4.14	3.73	3.77	4.61
C0000	PL21	2.81	2.72	3.1	2.98	3.33	3.33	2.56	3.27	3.4	3.18	3.04	3.43	3.62	3.4	3.89	3.45	3.93	3.98	3.78	3.8	4.43
C0000	PL22	2.98	3.22	3.43	3.38	3.78	3.47	2.66	3.48	3.74	3.49	3.16	3.75	3.79	3.66	4.32	3.66	4.31	4.32	3.68	3.73	4.79
C0000	PL3	2.17	2.64	2.81	2.7	2.98	2.85	2.19	2.82	3.13	2.94	2.96	2.91	3.1	3.11	3.61	3.27	3.56
C0000	PL4	2.69	3.42	3.47	2.63	3.94	3.5	2.74	3.43	2.94	3.99	3.87	3.35	3.96	4.25	4.64	4.03	4.27	4.4	3.18	3.55	4.83
C0000	PL41	2.31	3.13	3.54	2.7	3.95	3.54	2.8	3.55	2.97	3.99	3.75	3.43	4.03	4.2	4.54	3.87	4.31	4.45	3.26	3.41	5
C0000	PL42	2.78	3.56	3.5	2.68	3.99	3.49	2.93	3.34	3.08	4.12	4.29	3.47	3.93	4.38	4.93	4.67	4.22	4.28	3.19	4.04	4.69
C0000	PL43	2.65	3.26	2.98	2.09	3.76	3.29	2.06	3.05	2.53	3.71	3.57	2.75	3.69	4.23	4.63	3.57	4.15	4.41	2.72	3.14	4.28
C0000	PL5	3.84	4.09	4.46	3.81	4.81	4.57	3.4	4.35	4.56	4.46	4.73	4.88	5.01	4.8	5.52	4.74	5.4	5.35	4.6	4.65	5.75
C0000	PL51	3.71	3.87	4.36	3.68	4.65	4.39	3.22	4.09	4.15	4.18	4.56	4.48	4.6	4.61	5.2	4.61	5.08	5.1	4.34	4.37	5.52
C0000	PL52	4.06	4.45	4.62	4.01	5.06	4.86	3.69	4.76	5.18	4.9	5	5.5	5.65	5.09	6.06	4.95	5.88	5.74	5	5.07	6.11
C0000	PL6	2.55	3.11	3.39	3.07	3.62	3.11	2.91	3.49	3.28	3.66	3.77	3.57	3.81	4.11	4.39	3.95	3.97	4.27	3.42	3.93	5.03
C0000	PL61	2.5	3.4	3.56	3.01	3.87	3.24	3.03	3.65	3.28	3.8	3.7	3.71	3.98	4.34	4.57	3.88	4.23	4.57	3.55	3.97	5.34
C0000	PL62	2.68	2.97	3.08	3.28	3.36	2.79	2.71	3.27	3.38	3.54	4.03	3.48	3.77	3.91	4.12	3.88	3.66	3.87	3.2	3.85	4.76
C0000	PL63	2.49	2.84	3.44	2.94	3.53	3.23	2.96	3.48	3.18	3.59	3.6	3.45	3.61	3.93	4.37	4.13	3.87	4.2	3.43	3.97	4.8
C0000	PL7															3.56	3.01	3.22	3.46	2.96	2.88	4.11
C0000	PL71	2.05	2.61	2.72	2.31	3.08	2.72	2.29	2.99	2.8	3.14	3.08	3.13	3.05	3.04	3.66	3	3.32	3.57	2.95	2.89	4.42
C0000	PL72	1.49	2.6	2.75	2.56	2.82	2.72	2.01	2.82	3.1	2.86	2.55	2.82	2.86	2.86	3.3	3.03	2.97	3.2	2.98	2.88	3.34
C0000	PL8															3.66	3.31	3.65	3.88	3.37	3.51	4.48
C0000	PL81	2.45	2.74	2.99	2.85	3.13	2.96	2.15	2.85	3.33	3.03	3.1	3.05	3.2	3.22	3.9	3.63	4.06	4.31	3.8	3.88	4.76
C0000	PL82	2.6	2.7	3.11	2.93	3.21	2.97	2.54	3.1	3.28	3.12	3.1	3.14	3.45	3.28	3.7	3.4	3.68	3.84	3.83	3.61	4.68
C0000	PL84	2.2	2.39	2.42	2.43	2.69	2.68	2.14	2.59	2.69	2.7	2.86	2.58	2.87	2.95	3.22	2.65	2.89	3.06	2.4	2.79	3.88
C0000	PL9															3.31	2.77	3.05	3.22	2.83	2.98	3.91
C0000	PL91	2	2.59	2.63	2.58	2.89	2.7	2.13	2.6	2.76	2.78	2.78	2.64	2.89	2.94	3.08	2.58	2.84	3.22	2.49	2.38
C0000	PL92	2	2.59	2.63	2.58	2.89	2.7	2.13	2.6	2.76	2.78	2.78	2.64	2.89	2.94	3.33	2.79	3.08	3.22	2.87	3.04
C0000	PT	2.81	2.64	2.94	2.65	2.99	2.07	3.25	3.45	3.63	3.32	3.37	4.1	4.1	4.36	4.44	4.62	4.44	4.77	4.82	5.18	4.89	5.26
C0000	PT1	2.81	2.64	2.94	2.65	2.99	2.06	3.25	3.45	3.63	3.32	3.38	4.11	4.11	4.36	4.44	4.63	4.45	4.77	4.82	5.19	4.89
C0000	PT11	2.42	2.33	2.38	2.27	2.33	1.95	2.18	2.21	2.24	2.15	2.16	2.4	2.34	2.42	2.54	2.47	2.46	2.5	2.84	3.43	3.46
C0000	PT15	1.58	1.81	1.79	1.63	1.67	1.13	1.98	2.37	2.37	2.22	2.21	2.38	1.69	2.15	2.47	2.4	2.58	2.7	2.16	1.72	1.93
C0000	PT16	3.53	3.22	3.26	3.3	3.39	3.13	3.89	4.06	4.01	4.22	4.64	5.41	5.03	5.27	5.43	5.53	5.69	6.21	5.47	6.17	6.47
C0000	PT17	4.92	5.45	5.16	7.27	6.97	6.87	7.23	8.02	8.78	6.08	6.94	7.22	7.77	8.07	7.76	7.81	6.76	7.24	6.6	7.11	6.01
C0000	PT18	2.68	2.5	2.95	2.43	2.95	1.6	3.24	3.45	3.66	3.27	3.23	4.09	4.2	4.49	4.54	4.85	4.52	4.84	5.1	5.28	4.72
C0000	RO	1.85	3	2.38	2.34	3.89	3.3	3.08		3.23	2.82	3.32	3.99	2.36	3.85	4.05	3.53	3.96	5.22	6	5.46	3.45	5.52
C0000	RO1	2.06	3.24	3.03	2.8	3.86	3.29	3.03	2.53	3.44	2.83	3.45	3.86	2.58	3.76	4.15	3.43	3.9	4.9	5.64	5.16	5.02
C0000	RO11	1.89	3.18	3.05	2.84	3.94	3.4	3.14	2.48	3.53	2.7	3.5	3.83	2.66	3.83	4.1	3.3	3.79	4.94	5.74	5.25	4.88
C0000	RO12	2.33	3.33	3.01	2.74	3.73	3.12	2.88	2.62	3.3	3	3.38	3.9	2.46	3.64	4.22	3.66	4.08	4.84	5.48	5.01	5.2
C0000	RO2	1.84	2.31	2.5	2.41	3.66	3.3	3.07		3.17	2.55	3.25	4	2.02	3.7	4	3.29	3.81	5.12	6.07	5.09	2.31
C0000	RO21		2.69	2.91	2.3	2.92	3.04	2.97		3.38	3	3.38	3.82	2.05	3.98	4.32	3.02	3.46	5	5.95	5.06	3.23
C0000	RO22	1.92	2.04	2.2	2.5	4.27	3.5	3.15		3.03	2.28	3.17	4.1	2	3.54	3.82	3.46	4.02	5.2	6.15	5.12
C0000	RO3	1.86	3.23	2.15	1.78	4.17	3.15	3.1		3.3	2.85	3.28	4.22	2.61	4.27	4.26	4.01	4.09	5.59	6.03	5.69	3.07
C0000	RO31	1.87	3.23	2.15	1.78	4.15	3.13	3.07		3.31	2.86	3.28	4.22	2.61	4.28	4.26	4.01	4.09	5.61	6.05	5.7	3.07
C0000	RO32		3.23	2.16	1.79	4.38	3.41	3.82		3.07	2.52	3.29	3.89	2.53	4.15	4.25	4.08	4.11	4.95	5.29	5.08	3.36
C0000	RO4		3.5	2.04	2.41	3.96	3.43	3.1		3.13	3.11	3.36	3.85	2.45	3.73	3.89	3.49	4.09	5.22	6.08	5.84	4.26
C0000	RO41		3.43		1.85	3.72	3.34	2.84		2.91	3.14	3.14	3.58	1.88	3.39	3.56	3.12	3.35	5.3	5.66	5.04	3.71
C0000	RO42	2.15	3.6	3.1	3.11	4.26	3.55	3.48	2.6	3.43	3.07	3.66	4.18	3.17	4.15	4.28	3.93	5.05	5.1	6.64	6.71	5.17
C0000	RS								3.74	5.12	5.28	5.43	5.31	3.7	5.17	5.97	4.8	6.18	3.97	6.15	6.14	6.58	5.78
C0000	RS1																		4.55	7.24	7.08	7.01
C0000	RS11																		3.47	4.96	4.96	6.08
C0000	RS12																		4.64	7.44	7.27	7.09
C0000	RS2																		3.2	4.7	4.88	5.95
C0000	RS21																		3.45	5.09	5.07	6.13
C0000	RS22																		2.91	4.28	4.67	5.75
C0000	SE	4.64	4.57	4.84	4.62	4.93	4.98	4.29	5.15	4.82	5.08	4.51	4.71	5.11	5.12	5.65	6.05	5.45	6	3.54	6.29	5.99	5.06
C0000	SE1	4.53	4.1	4.66	4.43			4.53	5.31	5.65	4.83	4.05	4.32	4.86	4.63	5.54	5.97	5.37	5.92	3.49	6.17	6.11
C0000	SE11	4.61	3.52	4.23	4.01			4.18	4.85	4.88	4.3	3.51	3.6	4.74	3.87	5.2	5.21	4.67	5.14	2.96	5.22	5.86
C0000	SE12	4.52	4.16	4.7	4.47			4.57	5.36	5.72	4.88	4.09	4.39	4.87	4.69	5.57	6.04	5.43	5.99	3.53	6.26	6.13
C0000	SE2	5.02	5.15	5.26	5.05			4.4	5.27	5.3	5.54	5.06	5.17	5.55	5.67	6.03	6.39	5.75	6.39	3.72	6.65	6.23
C0000	SE21	4.02	3.6	4.25	4			3.09	3.94	4.57	4.67	3.63	3.82	5.04	4.87	5.01	5.52	5.22	5.07	2.94	5.03	5.45
C0000	SE22	6.28	6.47	6.16	6.46			4.89	6.2	6.14	6.92	5.91	6.41	6.85	6.72	7.14	7.4	6.58	7.43	3.86	7.67	7.23
C0000	SE23	4.37	4.64	4.87	4.24			4.41	4.89	4.78	4.64	4.79	4.5	4.47	5.01	5.43	5.76	5.22	5.94	3.82	6.27	5.63
C0000	SE3	2.32	2.42	2.91	3			2.66	3.61	3.62	2.97	2.65	2.92	2.84	3.45	3.5	3.9	3.75	3.72	2.38	4.29	3.82
C0000	SE31	2.78	2.71	3.08	3.23			2.83	3.92	3.89	3.09	2.78	3.2	3.2	3.6	3.73	4.31	4	4.21	2.31	4.63	4.04
C0000	SE32	1.04	1.63	2.36	2.46			2.05	2.71	3.08	2.58	2.26	2.16	1.56	2.85	2.74	2.69	3.02	2.8	2.14	2.79	2.7
C0000	SE33	1.54	1.72	2.49	2.36			2.27	2.66	2.68	2.55	2.3	2.06	1.69	3.1	2.8	2.09	2.78	1.57	2.84	3.12	3.05
C0000	SI	4.82	4.75	6.14	4.02	5.84	6.03	5.13	5.36	5.49	5.29	6	6.4	5.78	4.62	6.5	6.31	6.68	5.56	6.07	6.51	7.39	6.87
C0000	SI03								5.47			6.12	6.53	5.91	4.68	6.61	6.41	6.82	5.62	6.19	6.69	7.58
C0000	SI04								4.46			4.88	5.17	4.49	4.01	5.33	5.27	5.33	4.9	4.94	4.71	5.42
C0000	SK	2.63	3.78	3.89	3.11	4.63	4.48	3.96	3.56	5.18	4.34	3.7	5.01	3.83	4.49	6.04	5.08	6.44	4.86	5.43	5.34	6.13	6
C0000	SK01	2.63	3.77	3.4	3.07	4.5				5.3	4.42	4.07	5.13	3.23	4.5	5.59	4.73	6.23	3.43	5.12	4.88	5.86
C0000	SK02	3.13	4.46	4.45	3.56	5.24				5.8	4.81	4.21	5.63	3.96	4.94	6.61	5.45	7.13	5	5.99	5.74	6.69
C0000	SK03	2.17	3.15	3.04	2.48	3.75				4.18	3.43	2.71	3.82	3.39	3.51	4.98	4.21	4.95	4.31	4.16	4.52	4.67
C0000	SK04	1.95	2.93	3.16	2.44	3.61				3.93	3.49	2.48	3.75	3.86	3.69	5.1	4.56	5.3	5.1	4.56	4.72	5.32
C0000	TR	2.3	2.12	6.88	1.71	3.83	5.42	5.68	2.36	2.44			2.96	2.92	3.22	2.76	3.3	3.12	3.29	3.18	3.27	3.41
C0000	TR1	1	1	1	1	1							3.86	4.4		4.22	4.27	4.39	4.77	4.67	4.84	4.37
C0000	TR2	1	1	1	1	1							3.65	4.04		4.19	4.95	4.19	3.93	3.67	4.45	4.18
C0000	TR21	1	1	1	1	1							3.89	4.59		4.58	5.4	4.48	4.19	3.83	4.77	4.36
C0000	TR22	1	1	1	1	1							3.27	3.15		3.49	4.14	3.64	3.44	3.37	3.8	3.82
C0000	TR3	1	1	1	1	1							2.82	2.98		3.07	3.63	3.08	3.16	3.12	3.14	3.17
C0000	TR31	1	1	1	1	1							4.28	4.95		5.56	6.56	5.35	4.87	4.68	4.53	4.85
C0000	TR32	1	1	1	1	1							3.34	3.75		3.75	4.45	3.63	3.51	3.62	3.92	3.89
C0000	TR33	1	1	1	1	1							2.54	2.59		2.65	3.13	2.71	2.91	2.86	2.82	2.88
C0000	TR4	1	1	1	1	1							3.12	3.15		2.98	3.54	3.48	4.35	3.55	3.6	3.66
C0000	TR41	1	1	1	1	1							2.84	2.83		2.48	2.95	3.25	4.38	3.36	3.4	3.41
C0000	TR42	1	1	1	1	1							3.78	3.88		4.29	5.1	4.11	4.26	4.08	4.19	4.36
C0000	TR5	1	1	1	1	1							3.07	2.69		2.52	2.98	3.12	3.69	3.37	3.6	3.54
C0000	TR51	1	1	1	1	1							2.66	2.46		1.89	2.23	2.77	2.45	2.5	2.7	2.85
C0000	TR52	1	1	1	1	1							3.32	2.83		2.87	3.4	3.33	4.55	3.83	4.06	3.89
C0000	TR6	1	1	1	1	1							3.73	3.87		3.94	4.66	4.22	4.34	4.34	4.17	4.4
C0000	TR61	1	1	1	1	1							2.7	2.52		2.46	2.91	2.41	2.79	2.64	2.67	2.78
C0000	TR62	1	1	1	1	1							4.15	4.49		4.66	5.51	5.13	5.35	5.4	5.21	5.42
C0000	TR63	1	1	1	1	1							4.12	4.37		4.48	5.29	4.81	4.45	4.78	4.6	4.83
C0000	TR7	1	1	1	1	1							2.59	2.31		2.01	2.38	2.55	2.5	2.66	2.55	2.63
C0000	TR71	1	1	1	1	1							2.74	2.44		1.96	2.32	2.7	2.75	2.95	2.86	2.83
C0000	TR72	1	1	1	1	1							2.47	2.2		2.05	2.42	2.43	2.3	2.43	2.3	2.48
C0000	TR8	1	1	1	1	1							2.92	2.5		2.36	2.79	2.66	2.69	2.7	2.93	2.85
C0000	TR81	1	1	1	1	1							1.64	1.85		1.75	2.06	1.58	1.54	1.62	1.64	1.86
C0000	TR82	1	1	1	1	1							2.3	2.1		2.39	2.85	1.71	1.55	2.42	2.62	2.55
C0000	TR83	1	1	1	1	1							3.21	2.68		2.41	2.84	3.18	3.4	2.86	3.09	3
C0000	TR9	1	1	1	1	1							1.39	1.63		1.3	1.54	1.82	1.84	1.85	1.73	1.98
C0000	TRA	1	1	1	1	1							1.67	1.79		1.71	2.03	1.83	1.7	1.96	1.78	2.12
C0000	TRA1	1	1	1	1	1							1.83	1.89		1.84	2.18	1.98	1.76	2.2	2.08	2.2
C0000	TRA2	1	1	1	1	1							1.54	1.71		1.61	1.91	1.7	1.65	1.75	1.53	2.06
C0000	TRB	1	1	1	1	1							1.73	1.64		1.52	1.8	1.85	1.99	2.08	2.08	2.18
C0000	TRB1	1	1	1	1	1							2.05	1.93		1.5	1.77	2.1	2.08	1.88	2.59	2.49
C0000	TRB2	1	1	1	1	1							1.48	1.4		1.54	1.82	1.64	1.91	2.23	1.7	1.95
C0000	TRC	1	1	1	1	1							3.25	3.61		3.2	3.79	3.43	3.73	3.51	3.61	4.33
C0000	TRC1	1	1	1	1	1							3.33	3.31		2.51	2.97	2.77	3.47	3.46	3.43	3.6
C0000	TRC2	1	1	1	1	1							3.1	3.65		2.98	3.53	3.22	3.4	3.29	3.5	4.47
C0000	TRC3	1	1	1	1	1							3.53	3.69		4.11	4.86	4.37	4.67	3.99	3.93	4.43
C0000	UK	7.16	6.29	7.08	7.08	7.05	7.2	7.26	6.6	7.42	7.03	6.91	6.95	6.17	6.56		7.94	6.94	7.15	6.71	7.85	6.29
C0000	UKC											6.95	7.14	5.95	5.83	7.35	8.13	6.92	7.17	6.87	8.47
C0000	UKD											5.32	5.72	4.72	5.37	4.94	8.12	6.92	7.14	6.88	6.05
C0000	UKE											7.15	7.49	6.64	6.77	7.83	8.09	7.21	7.14	6.88	8.36
C0000	UKF											7.4	7.46	6.24	7.19	7.97	8.09	6.94	7.14	6.88	8.09
C0000	UKG											6.78	6.9	6.03	6.27	7.46	8.09	6.93	7.14	6.88	7.86
C0000	UKH											7.15	6.52	6.99	7.27	8.55	7.97	6.87	7.15	6.87	8.36
C0000	UKI											6.63	7.62	6.3	5.63		8.35		6.59	6.72
C0000	UKJ											7.29	7.48	6.65	6.61	8.06	8.1	6.98	7.14	6.87	8.14
C0000	UKK											6.39	6.92	5.21	6.04	7.05	8.1	4.91	7.14	6.88	7.23
C0000	UKL	5.08										6.43	6.45	5.25	5.8	6.4	7.06	7	7.08	5.86	7.06
C0000	UKM	6.05										6.36	6.36	5.45	6.14	6.93	7.17	6.93	7.14	5.86	6.98
C0000	XK								2.88	3.8	3.43	3.59	3.59	3.2	3.81	3.5	3.29	4.18	3.96	3.57	3.7	4.24
C1000	AL	3.17	3.03	3.29	3.19	3.47	3.46	3.55	3.73	4.08	4.31		4.75	4.88		4.89	4.88	4.72		4.84	5.04	5.21
C1000	AT	5.41	5.86	5.84	5.27	6.52	6.15	5.74	5.87	6.83	6.16	5.93	7.07	6.01	5.85	7.06	6.18	7.23	6.25	6.14	6.95	7.38	7.11
C1000	AT1	4.43	5.33	4.92	4.45	5.85	5.25	5.08	4.71	6	5.24	5.22	6.21	4.77	5.43	6.2	5.42	6.63	4.98	5.28	6.03	6.41
C1000	AT11	4.48	4.91	4.75	4.32	5.51	5.22	5.21	4.88	6.06	4.94	5.26	5.88	5.42	4.4	5.91	4.97	6.22	4.91	5.07	5.74	6.04
C1000	AT12	4.42	5.43	4.96	4.48	5.93	5.26	5.05	4.67	6	5.31	5.22	6.29	4.63	5.66	6.27	5.53	6.72	5	5.33	6.09	6.5
C1000	AT13	3.79	4.46	4.38	4.24	5.67	3.88	4.62	4.08	5	4.33	4.22	5.49	3.3	5.16	5.06	4.98	6.24	4.15	4.52	5.48	5.55
C1000	AT2	8.41	7.69	8.88	7.48	8.63	9.42	8.25	9.19	9.91	9.14	8.54	9.93	9.58	7.11	9.66	9.04	9.68	9.8	8.65	9.53	10.33
C1000	AT21	7.53	6.47	7.78	6.58	7.16	7.5	5.82	7.55	8.63	8.09	6.32	8.4	8.4	5.77	8.74	8.58	9.17	9.2	7.68	8.48	9.26
C1000	AT22	8.74	8.16	9.3	7.82	9.15	10.13	9.16	9.82	10.39	9.54	9.4	10.52	10.02	7.62	10.01	9.23	9.9	10.04	9.04	9.95	10.77
C1000	AT3	6.25	6.19	6.54	6.21	7.09	6.73	6.1	7.15	7.29	6.98	6.41	7.74	7.38	6.39	7.93	6.64	7.49	7.63	7.1	8.01	8.4
C1000	AT31	6.28	6.21	6.57	6.23	7.12	6.76	6.12	7.19	7.32	7	6.44	7.77	7.41	6.41	7.96	6.66	7.53	7.67	7.13	8.05	8.43
C1000	AT32	4	4.39	4.12	4.29	4.44	4.27	3.86	4.62	4.6	4.64	4.18	5.52	4.4	4.73	5.6	5.22	4.98	4.73	5.15	5.43	5.94
C1000	AT33	5.09	5.09	4.8	5	5.62	3.12	3.86	4.25	5	4.38	4.52	4.84	4.74	5.4	4.66	5.2	3.96	4.96	5.15	5.01	5.19
C1000	AT34	6.5	6.5	4.5	5	4.5	4	4	5	5.5	5.5	5.18	5.76	5.39	4.8	4.64	4	4.19	4.4	4.41	3.96	4.41
C1000	BA	2.57	3.17	3.84	2.53	4.45	4.27	4.33	3.24	4.42	4.52	4.31	3.73	3	4.06	3.77	3.82	5.35	3.75	5.55	5.42	6.12	4.49
C1000	BE	9.01	9.49	9.54	9.95	10.48	9.98	9.69	9.6	10.64	9.18	12.02	8.54	8.28	8.85	9.16	9.17	6.61	8.65	7.98	8.99	8.43	7.98
C1000	BE2	8.47	8.66	8.66	8.88	9.44	9	8.55	8.62	9.29	9.9	9.51		8.89	9.64	9.98	9.99	7.29	9.62	8.07	9.59	8.91
C1000	BE21	9.12	9.04	9.45	8.37	9.84	9.77	6.95	8.6	9.13	9.25	9.21	9.12	8.58	8.86	10.34	9.42	5.3	10.19	5.49	9.01	7.9
C1000	BE22	8.28	8.55	8.39	8.18	9	8.66	7.62	8.52	9.03	9.61	8.83	9.22	9.5	9.64	9.91	9.71	6.47	9.07	7.76	9	8.29
C1000	BE23	8.83	9.18	9.01	9.39	9.82	9.63	9.16	8.99	9.56	10.45	9.91	9.8	8.72	9.98	10.35	10.31	7.4	9.9	7.83	9.69	9.1
C1000	BE24	8.31	8.82	8.36	8.5	9.17	8.51	8.49	8.42	8.98	9.74	9.02	8.82	8.9	9.5	9.93	9.57	7.13	9.44	8.07	9.46	8.91
C1000	BE25	8.26	8.13	8.56	9.27	9.45	8.9	9.01	8.55	9.47	9.93	9.96	9.44	8.81	9.68	9.69	10.3	8.08	9.7	8.91	10.02	9.32
C1000	BE3	7.6	7.84	7.73	7.75	8.19	7.75	7.59	7.35	7.94	8.6	7.91		7.79	8.27	8.57	8.59	6.13	7.97	7.92	8.59	8.1
C1000	BE31	8.12	8.62	8.1	8.05	8.12	7.99	8.25	7.92	8.28	8.84	8.41	7.4	8	8.69	9.09	9.06	6.67	8.7	8.17	9.01	8.8
C1000	BE32	7.75	7.62	7.72	8.08	8.55	8.04	7.69	7.29	8.15	8.95	8.32	8.33	8.22	8.58	8.75	9.05	6.31	8.4	8.31	9.1	8.45
C1000	BE33	8.05	8.86	8.3	8.3	8.79	8.19	8.09	7.87	8.32	8.87	8.13	8.4	8.06	8.83	9.13	8.92	6.38	8.37	8.22	8.94	8.83
C1000	BE34	5.25	5.43	5.29	5.35	5.05	5.15	5.17	4.78	5.67	5.92	5.11	5.59	5.47	5.77	5.95	5.8	4.39	5.39	5.51	5.81	5.31
C1000	BE35	7.38	7.59	7.73	7.38	8.11	7.53	7.3	7.29	7.65	8.39	7.46	7.54	7.33	7.8	8.35	8.23	5.91	7.39	7.67	8.16	7.56
C1000	BG	2.61	2.9	3.16	2.36	4.08	3.38	3.57	2.13	4.2	3.6	4.11	4.35	3.77	4.66	4.93	4.75	4.92	5.63	5.56	5.77	4.37	5.96
C1000	BG3								2.08			4.27	4.5	3.94	4.94	5.18	5.01	5.17	5.92	5.84	6.05	4.41
C1000	BG31								1.56			4.67	4.55	3.7	4.92	5.55	5.17	5.09	5.87	6.12	6.24	5.69
C1000	BG32								2.16			4.59	4.8	4.04	5.62	5.44	5.6	5.48	6.47	6.25	6.99	5.16
C1000	BG33								2.24			4.58	4.84	4.37	5.34	5.44	5.09	5.58	6.41	6.24	5.81	2.98
C1000	BG34								2.4			3.03	3.59	3.56	3.69	4.07	3.94	4.32	4.71	4.3	4.84	3.36
C1000	BG4								2.44			3.14	3.39	2.81	3.16	3.45	3.15	3.48	3.74	3.76	3.95	4.17
C1000	BG41			2.04	2.33				2.39			2.84	3.08	2.43	2.88	3.24	2.91	3.33	3.26	3.45	3.82	3.68
C1000	BG42								2.45			3.26	3.5	2.98	3.29	3.55	3.27	3.54	3.96	3.91	4.01	4.41
C1000	CH							6.19	6.42	6.57	6.58	6.17	6.77	6.37				5.22	6.89	6.29	6.67	7.07	6.39
C1000	CY		2.28	2.46	2.26							2		2.4			2.68				2.56	2.28
C1000	CZ	3.91	4.52	4.33	3.95	5.46	4.75	4.17	4.53	5.37	5.08	4.7	5.6	4.53	5.32	6.23	5.89	6.33	5.5	5.21	5.65	6.04	6.11
C1000	CZ01	4.15	4.99	4.73	4.46	6.07	5.34	4.61	4.67	5.92	5.65	5.13	6.09	4.85	5.81	6.78	6.8	6.84	6.07	5.46	5.86	6.09
C1000	CZ02	3.88	4.68	4.42	4.11	5.63	4.89	4.38	4.66	5.56	5.28	4.84	5.7	4.64	5.44	6.43	6.19	6.48	5.81	5.28	5.75	6.04
C1000	CZ03	3.76	4.07	4.04	3.53	5.16	4.38	3.75	4.41	4.88	4.6	4.3	5.12	4.38	4.89	5.86	5.4	5.76	5.2	5.18	5.48	5.86
C1000	CZ04	3.42	3.95	4.25	4.08	5.57	4.74	4.26	4.48	5.44	5.2	4.83	5.57	4.6	5.45	6.44	6.2	6.45	5.77	5.27	5.69	5.9
C1000	CZ05	4.15	4.54	4.33	4.03	5.49	4.76	4.19	4.68	5.41	5.22	4.73	5.62	4.74	5.31	6.34	5.99	6.37	5.78	5.22	5.71	6.02
C1000	CZ06	3.7	4.81	4.37	3.87	5.39	4.78	4.12	4.34	5.37	5.12	4.71	5.68	4.24	5.37	6.05	5.64	6.42	5.06	5.1	5.61	6.23
C1000	CZ07	4.63	4.97	4.72	4.38	5.74	5.1	4.56	4.79	5.8	5.59	5.02	6.06	4.93	5.63	6.6	6.32	6.66	5.88	5.31	5.8	6.16
C1000	CZ08	4.06	4.05	4.24	3.88	5.27	4.64	4.06	4.46	5.18	4.93	4.53	5.41	4.51	5.12	6.09	5.76	6.12	5.42	5.18	5.53	5.82
C1000	DE	6.45	7.06	6.25	5.76	7.36	6.72	6.49	6.18	7.12	7.2	6.68	6.45	6.96	7.31	8.05	7.49	7.18	7.26	6.18	6.95	7.13	6.99
C1000	DE1	6.62	6.48	6.51	5.66	7.12	6.35		6.59	6.98	7.15	6.79	7.04	7.06	7.1	8.03	6.93	6.65	7.73	7.24	7.55	7.36
C1000	DE11				5.46
C1000	DE12				5.41
C1000	DE13				5.9
C1000	DE14				5.95
C1000	DE2	6.3	6.35	6.11	5.34	7.3	6.19	6.13	6.58	6.72	6.7	6.23	6.65	6.8	6.86	7.92	7.17	7.22	7.44	6.77	7.24	7.53
C1000	DE21				5.9
C1000	DE22				6.18
C1000	DE23				4.86
C1000	DE24				4.5
C1000	DE25				4.29
C1000	DE26				4.96
C1000	DE27				5.95
C1000	DE4	4.26	5.8	4.82	3.27	5.98	5.23	4.67	4.42	5.09	5.62	5.06	4.16	5.07	5.85	6.38	5.75	5.52	5.29	4.04	4.71	5.4
C1000	DE7	6.57	6.98	6.34	6.13	7.57	6.54	6.84	6.41	7.32	7.18	7.06	6.65	6.11	7.49	7.56	7.26	6.91	7.05	6.28	7.24	6.92
C1000	DE71				6.16
C1000	DE72				5.9
C1000	DE73				6.24
C1000	DE9	6.85	7.65	6.32	6.4	7.53	7.42	6.98	6.17	7.64	7.65	7.1	7.02	7.37	7.91	8.33	8.21	7.66	7.64	6.15	7.22	7.19
C1000	DE91				6.66
C1000	DE92				6.69
C1000	DE93				5.78
C1000	DE94				6.48
C1000	DEA	7.38	8.38	7.58	7.25	8.02	7.88	7.32	6.76	8.3	8.32	7.37	7.83	8.26	8.61	8.89	8.55	7.83	7.91	7.35	7.79	7.96
C1000	DEA1				7.46
C1000	DEA2				7.8
C1000	DEA3				7.26
C1000	DEA4				6.8
C1000	DEA5				7.39
C1000	DEB	5.89	5.74	5.82	5.28	6.64	5.69	6.24	5.47	6.59	6.74	6.48	5.55	6.2	7.04	6.74	6.85	6.29	6.51	6.87	6.9	6.76
C1000	DEB1				5.45
C1000	DEB2				5.27
C1000	DEB3				5.1
C1000	DED	5.92	6.69	5.61	4.49	7.31	6.57	5.67	6.22	6.67	6.64	6.43	6.08	6.62	6.35	8.07	7.32	7.55	7.04	6.03	6.69	7.01
C1000	DED2				4.09
C1000	DEE	6.44	7.17	5.95	5.68	7.55	6.65	6.42	6.08	7.43	7.45	6.94	5.91	6.98	7.19	8.07	6.86	7.72	6.84	5.29	5.7	6.31
C1000	DK01							5.98	5.78	6.15	6.71	5.95	5.61	6.63	6.47	6.95	6.99	6.41	7.26	4.31	7.2	7.27
C1000	DK02							6.63	6.44	6.93	7.8	6.55	6.34	7.27	7.34	7.68	7.85	6.99	7.55	5.13	7.92	7.71
C1000	DK03							5.75	5.54	5.82	6.66	5.96	5.65	6.18	6.24	6.63	6.64	6.02	6.78	4.88	6.7	6.77
C1000	DK04							8.87	8.94	8.76	10.31	5.57	5.77	5.92	5.83	6.37	6.48	5.87	6.62	4.83	6.65	6.73
C1000	DK05							5.47	5.5	5.89	6.53	5.25	5.65	5.68	5.8	6.17	6.43	5.89	6.52	4.85	6.55	6.54
C1000	EE	2.12	2.04	2.02	1.92	2.33	2.69	2.21	3.01	2.79	2.76	2.46	2.6	3.41	3.14	3.67	4.38	2.66	3.97	2.62	4.46	4.41	3.5
C1000	EFTA
C1000	EL	3.54	3.15	3.32	3.4	3.66	3.5	3.62	3.64	4.57	4.28	4.45	5.08	4.46	4.52	4.3	3.59	3.99	3.51	3.66	3.9	4	3.74
C1000	EL1								3.68	4.4	4.1	4.08	4.98	4.36	4.87	4.73
C1000	EL2								5.15		5.99	4.47	4.89	5.21	4.74	5.61
C1000	EL3	1.81									1.75	2.84	4.53	1.93	1.83	1.91	3.98	3.91	4.22		1.96	3.84
C1000	EL4								1.45	1.45	1.97	2.07	3.86	2.12	1.71	1.71
C1000	EL41	1.54				1.6	1.56	1.65	1.63	1.73	2.57	1.88	2.3	2.08	1.92	1.74			1.6
C1000	EL41_42								1.4	1.42	1.85	1.88	3.17	1.96	1.62	1.6
C1000	EL42								1.37	1.35	1.68	1.88	3.45	1.93	1.53	1.56	1.53
C1000	EL43	1.93	1.57	1.68	1.69	2.47	2.24	2.21	2.23	1.89	3.78	3.96	8.16	3.21	2.31	2.83
C1000	EL51	4.11	3.77	3.88	4.08	4.3	4.25	4.24	4.53	5.2	4.89	4.62	6.78	5.31	5.84	5.74	5.52	5.2	5.55	4.78	6.1	5.68
C1000	EL52	3.08	2.72	2.88	2.93	3.15	3.07	3.24	3.17	3.89	3.53	3.99	4.18	3.74	4.34	4.18	3.28	3.66	3.11	3.97	4.44	4.54
C1000	EL53	2.78	2.49	2.71	2.73	3.03	2.83	2.88	2.99	3.52	3.3	4.18	4.26	3.53	4.09	3.95	3.5	3.68	3.36	3.06	3.62	4.13
C1000	EL54	6.77	6.5	6.98	7.23	7.42	7.32	6.44	7.01	7.1	7.86	9.8	7.4	7.87	7.41	7.69	7.5	7.29	6.22	6.44	6.08	6.6
C1000	EL61	4.07	3.57	3.72	3.74	4.04	3.84	4.13	4.31	5.13	4.89	3.73	5.49	5.16	5.49	5.1	4.4	4.98	4	4.42	4.01	4.31
C1000	EL62	1.89	1.62	1.78	1.66	1.96	1.85	1.98	1.98	2.13	2.57	4.09	5.49	3.2	2.3	2.71	1.18	2.12	1.57	1.45	1.52	1.47
C1000	EL63	8.72				8.97	7.83	8.65	9.67	10.36	10.16	5.7	5.75	6.22	4.98	8.7	2.69	2.73	2.15	2.35	2.19	2.43
C1000	EL64	3.61	3.11	3.24	3.29	3.61	3.15	3.64	3.76	4.39	4.43	3.46	4.33	4.56	4.59	4.51	3.89	3.93	3.76	3.86	3.43	3.31
C1000	EL65	2.26	1.89	2.02	2.03	2.42	2.36	2.35	2.32	2.5	3.45	2.71	2.66	2.73	3.12	2.52	2.53	2.42	2.4	2.54	2.32	2.45
C1000	ES	3.55	2.72	3.15	3.12	3.7	2.08	2.96	3.88	3.54	2.84	3.2	3.61	2.75	3.98	3.18	3.28	3.93	2.77	4.15	3.37	4.45	4.19
C1000	ES1	3.12	3.22	3.3	3.41	3.58	3.71	4.31				4.73	4.58	4.85	4.53	5.32	5.21	4.87	4.27	4.39	4.28	4.35
C1000	ES11	3.17	3.29	3.32	3.47	3.63	3.76	4.33				4.83	4.69	5.09	4.62	5.38	5.33	4.99	4.36	4.48	4.37	4.43
C1000	ES12	2.21	2.29	2.43	2.31	2.36	2.33	2.43				2.22	2.05	2.03	2.31	1.98	2.04	2.48	2.29	2.31	2.58	2.63
C1000	ES13	1.92	1.82	3.23	2	2.58	2.67	4.26				2.1	2.1	1.26	2.26	1.92	2.23	2.31	2.03	2.1	1.96	2.23
C1000	ES2	3.55	2.96	2.94	3.34	3.99	2.61	3.28				3.84	3.82	3.04	4.53	3.8	3.74	4.81	4.03	4.34	4.3	4.84
C1000	ES21	5.21	4.62	5.67	4.48	4.34	5.15	5.04				5.78	5.93	5.89	4.68	4.69	4.82	6.55	5.51	5.24	6.85	6.88
C1000	ES22	4.43	3.8	3.62	4.32	4.31	4.46	4.56				4.55	4.46	4.29	4.84	4.91	4.77	5.69	5.12	5.22	5.47	5.57
C1000	ES23	4.73	3.13	3.91	4.52	4.83	4.12	4.25				4.49	4.41	3.94	5.37	4.35	4	5.45	3.92	5.41	5.11	5.59
C1000	ES24	3.14	2.65	2.54	2.95	3.84	1.89	2.79				3.5	3.5	2.5	4.39	3.46	3.44	4.49	3.73	4.05	3.88	4.53
C1000	ES4	3.79	2.54	3.13	3.08	3.6	2.01	2.96				3.08	3.61	2.71	3.9	2.97	3.23	4.03	2.3	4.14	3.19	4.56
C1000	ES41	4	2.34	2.92	3.2	3.68	2.28	2.91				3.56	3.9	2.98	4.29	3.23	3.63	4.65	1.96	4.5	3.48	5.11
C1000	ES42	3.26	2.34	3.16	2.76	3.41	1.35	2.78				2.37	3.05	2.14	3.25	2.37	2.38	3.1	2.35	3.22	2.52	3.68
C1000	ES43	4.63	4.54	4.39	3.58	3.91	2.81	4.28				3.19	4.33	3.74	4.3	4.11	4.62	4.23	4.54	5.94	4.47	4.83
C1000	ES5	3.47	3.3	4.07	3.19	3.91	2.03	3.06				4.17	3.87	3.72	4.71	3.53	3.58	4.41	4.08	4.94	3.9	5.23
C1000	ES51	3.78	3.61	4.46	3.68	4.25	2.12	3.22				4.43	4.09	3.96	5.32	4.1	3.81	4.86	4.42	5.43	4.21	5.83
C1000	ES52	1.82	1.96	2.46	2.36	2.57	1.54	2.04				2.35	2.6	1.62	2.6	3.36	3.8	3.74	4.1	4.73	4.21	4.7
C1000	ES53	1.22	1.35	1.29	1.33	2.12	1.62	2.15				2.87	2.61	3.09	1.7	1.23	1.28	1.47	1.18	1.39	1.15	1.16
C1000	ES6	2.41	2.92	3.05	2.87	3.59	1.57	3.31				2.28	3	1.77	3	3	3.16	2.5	2.97	3.95	3.15	3.46
C1000	ES61	2.59	3.06	3.21	3.02	3.75	1.65	3.47				2.34	3.15	1.81	3.11	3.15	3.31	2.6	3.1	4.12	3.26	3.49
C1000	ES62					1.6		1.28				1.35		1.24							1.55	3.01
C1000	ES64
C1000	EU	5.71	5.45	5.63	5.12	5.49	5.01	4.86	4.53	5.2	5.04		5.17	4.86	5.3		5.48	5.27	5.56	5.31	5.7	5.45	5.67
C1000	EU28	4.51	4.6	4.68	4.23	5.29	4.8	4.67	4.53	5.22	5.05		5.17	4.86	5.3		5.48	5.27	5.56	5.31	5.7
C1000	FI	3.51	3.17	3.31	3.17	2.96	3.42	3.29	3.54	3.38	3.58	3.19	3.56	3.57	3.75	3.74	3.67	3.62	4.01	3.05	4.26	3.59	2.76
C1000	FI1	3.5	3.2	3.3	3.18	3.21	3.42	3.29	3.66	3.38	3.58	3.19	3.56	3.57	3.49	3.52	3.66	3.62	4	3.06	4.26	3.59
C1000	FI13	3.12	2.9	2.98	2.74	2.47	2.74	3.14	2.98	2.69	2.91	2.67	3.19	2.51	3.24	2.81
C1000	FI18	3.65	3.4	3.27	3.4	3.41	3.58	3.37	3.86	3.65	3.94				3.83	3.96
C1000	FI19	3.53	3.12	3.41	3.1	3.26	3.47	3.3	3.66	3.54	3.52	3.39	3.59	3.6	3.86	3.79	3.82	3.72	3.94	3.24	4.38	3.61
C1000	FI1A	2.99	2.84	3.3	2.88	2.74	3.2	3.04	3.26	2.01	2.79	3.09	3.33	2.98	3.22	3.22
C1000	FR	7.16	6.67	7.38	6.07	7.46	6.9	6.74	6.47	7.19	7.38	7.02	6.86	7.21	7.03	7.5	7.5	5.62	7.25	6.83	7.5	6.39	7.09
C1000	FR2	7.44	6.92	7.64	6.31	7.84	7.21	6.94	6.63	7.48	7.71	7.26	6.94	6.94	7.38		7.95	5.13
C1000	FR4	7.56	6.61	7.38	5.89	7.98	7.3	6.9	6.7	7.34	7.8	7.33	7.36	7.36	6.97		7.48	5.7
C1000	FR5	6.84	6.53	7.36	6.38	7.11	6.7	6.64	6.23	6.94	7.18	6.58	6.49	6.49	6.9		7.36	6.06
C1000	FR6	6.71	6.33	7.03	5.28	6.7	6.28	6.45	6.11	6.72	6.26	6.64	6.66	6.66	5.98		6.51	6.35
C1000	FR7	7.01	6.31	6.92	4.59	6.89	6.39	6.43	6.45	6.49	6.64	6.64	6.57	6.57	6.53		6.14	6.28
C1000	FR8	4.07	3.64	3.96	3.25	3.93	3.62	3.15	3.76	3.82	3.72	4.03	3.79	3.79	4.49		4.05	4.39
C1000	FR9	2.84	2.84	1.97	2.83	2.71	2.74	2.63	1.67	1.5	1.4	1.35	1.43	1.43	1.36
C1000	FR91				1	1	1
C1000	FRA2
C1000	FRA3	4.28	7.14	5.22	7.35	5.54			0.97	0.97	0.97	0.97	0.97	0.97	1
C1000	FRA4	2.84	2.84	1.97	2.69	2.71	2.74	2.63	2.76	2.79	2.9	2.7	3	3	2.9
C1000	FRB													6.43	6.96	7.45	7.33	4.59	7.03	6.84	7.23	5.73
C1000	FRC													6.26	6.11	6.47	6.69	4.53	6.67	6.23	6.6	5.16
C1000	FRC1	7.07	6.13	6.83	4.78	7.19	6.37	6.15	5.78	6.45	6.86	6.36	6.07	6.07	6.08	6.28	6.71	4.45	6.55	6.31	6.51	4.95
C1000	FRC2	7.05	6.06	7.09	5.11	7.67	6.52	6.27	6.16	6.46	7.12	6.88	7.01	7.01	6.22	7.26	6.58	4.85	7.18	5.86	7.04	6.13
C1000	FRD													7.74	7.93	7.85	8.57	6.19	8.06	7.43	8.47	7.11
C1000	FRD1	6.74	6.61	7.5	7.03	7.79	7.16	7.02	6.12	7.61	7.51	7.3	7.18	7.18	7.37	7.35	7.9	5.86	7.5	6.72	7.95	6.67
C1000	FRD2	7.69	7.19	8.25	7.61	8.61	7.8	7.62	7.3	8.94	8.77	8.44	8.22	8.22	8.41	8.28	9.15	6.49	8.56	8.06	8.94	7.51
C1000	FRE													8.16	8.76	8.79	9.39	5.79	8.51	8.18	9.1	8.26
C1000	FRE1	7.81	7.82	8.28	8.48	8.92	8.19	7.91	7.16	8.8	9.05	8.6	8.91	8.91	8.74	8.75	9.67	6.3	8.87	8.57	9.45	8.75
C1000	FRE2	8.03	7.98	8.33	7.61	8.83	7.93	7.84	7.41	8.72	8.9	8.18	7.76	7.76	8.78	8.81	9.25	5.52	8.32	7.98	8.92	8.01
C1000	FRF													7.21	7.26	7.77	8	5.58	7.1	7.27	7.62	7.09
C1000	FRF1	9.85	8.61	9.35	7.82	9.58	9.39	8.48	9.4	9.73	10.05	9.07	10.45	10.45	8.95	10.28	9.34	8.42	10.32	9.59	9.63	9.46
C1000	FRF2	7.73	7.34	7.68	6.47	8.09	7.48	7.17	6.93	7.22	7.94	7.52	7.03	7.03	7.36	7.9	8.23	5.32	7.17	7.25	7.72	7.06
C1000	FRF3	6.68	5.88	6.57	5.31	7.37	6.63	6.42	5.68	6.58	7.03	6.69	6.07	6.07	6.37	6.41	7.01	4.81	5.76	6.33	6.63	6.12
C1000	FRG													6.62	6.79	7.53	7.41	5.8	7.28	6.5	7.46	5.81
C1000	FRH													7.29	7.24	7.68	7.7	6.84	7.72	7.08	7.74	7.18
C1000	FRI													6.61	6.61	7.58	7.18	6.16	7.32	6.72	7.52	6.06
C1000	FRI1	7.74	7.3	8.34	6.42	7.92	6.95	7.44	7.63	7.74	7.64	7.7	8.26	8.26	6.72	8.21	7.68	7.41	8.94	7.76	8.85	7.12
C1000	FRI2	4.81	4.6	5.13	3.85	5.28	5.1	5.18	4.37	4.77	5.45	4.89	5.16	5.16	4.91	5.81	5.46	3.65	5.25	4.41	5.15	4.1
C1000	FRI3	7.27	6.64	7.64	6.38	7.06	6.37	6.49	6.51	6.85	6.92	6.33	5.74	5.74	6.73	7.41	7.07	5.72	6.66	6.39	7.04	5.68
C1000	FRJ													5.45	5.47	5.82	5.6	5.75	5.92	4.89	6.13	4.9
C1000	FRJ1	4.03	3.55	3.96	3.39	4.03	3.57	3.3	3.67	3.71	3.64	4.02	3.69	3.69	4.57	3.97	4.02	4.12	4.47	3.69	4.3	3.98
C1000	FRJ2	6.19	5.83	6.33	4.63	6.01	5.95	5.91	5.27	6.24	5.39	6.13	5.73	5.73	5.61	6.12	5.84	6.01	6.14	5.07	6.38	5.03
C1000	FRK													6.57	6.53	7.14	6.14	6.28	6.71	6.29	6.12	5.69
C1000	FRK1	6.62	5.8	6.13	4.12	6.36	5.81	5.78	5.64	5.69	6.44	6.31	5.65	5.65	6.45	6.66	5.79	5.57	5.97	5.8	5.1	5.24
C1000	FRK2	7.26	6.66	7.44	4.92	7.25	6.79	6.87	7.01	7.04	6.79	6.88	7.22	7.22	6.58	7.51	6.41	6.82	7.3	6.67	6.92	6.06
C1000	FRL													3.87	4.34	3.94	4.04	4.62	4.45	3.9	4.12	4.09
C1000	FRM													6.78	7.32	6.98	6.61	6.56	6.93	7.22	7.02	6.74
C1000	HR	4.16	4.91	5.39	3.65	5.48	5.66	5.49	4.62	6.73	6.2	5.46	5.33	4.65	5.57	6.2	5.83	6.83	5.8	7.11	7.21	7.05	7.05
C1000	HR01											5.92	4.87
C1000	HR02											5.44	5.51	4.66	5.56	6.16	5.83	6.8	5.85	7.17	7.28	6.94
C1000	HR03											3.71	3.43	3.5	3.37	3.79	3.4	3.58	3.21	3.69	3.79	3.88
C1000	HU	3.63	4.88	3.96	3.04	5.59	5.53	5.1	3.49	5.79	4.72	4.73	5.11	3.76	4.83	5.88	5.23	6.47	5.82	6.29	6.37	6.66	5.91
C1000	HU1	2.95	3.96	2.8	1.91	4.64	4.78	4.61	2.61	5.48	3.79	4.06	4.61	3.08	4.21	5.37	4.78	5.53	5.22	5.94	5.79	5.88
C1000	HU2	4.06	5.07	4.85	3.55	5.79	6.18	5.71	3.66	6.26	5.55	5.42	5.55	4.02	5.13	6.61	5.76	7.07	6	6.94	6.86	7
C1000	HU21	3.84	4.75	4.2	3.02	5.43	6.1	5.52	3.31	6.21	5.12	5.12	5.63	3.76	4.96	6.11	5.56	6.81	5.52	7.02	6.43	6.4
C1000	HU22	3.54	3.72	3.96	3.38	5.18	5.23	4.83	4.04	5.51	5.19	5	5.25	4.43	4.79	6.1	5.31	6.39	5.38	5.99	6.26	6.59
C1000	HU23	4.54	6.15	5.86	4	6.41	6.87	6.41	3.63	6.74	6.08	5.89	5.68	3.93	5.45	7.26	6.22	7.71	6.79	7.56	7.6	7.73
C1000	HU3	3.41	4.85	3.4	2.75	5.54	5.08	4.66	3.45	5.47	4.17	4.19	4.79	3.62	4.67	5.36	4.86	6.08	5.74	5.81	6.06	6.47
C1000	HU31	2.69	3.97	2.63	2.52	4.83	4.59	3.94	3.08	4.9	3.66	3.64	4.34	3.68	4.33	4.96	4.61	5.64	5.59	5.3	6.15	5.98
C1000	HU32	3.62	5.1	3.4	3.05	5.75	5.2	4.67	3.36	5.94	4.28	4.07	4.89	3.85	4.76	5.59	4.68	6.39	6.29	5.98	6.29	6.86
C1000	HU33	3.49	4.98	3.68	2.59	5.62	5.17	4.9	3.68	5.27	4.25	4.5	4.89	3.4	4.71	5.28	5.13	5.98	5.29	5.86	5.81	6.31
C1000	IE	7.39	7.21	6.2	6.84	7.72	6.73	7.3	6.89	7.04	6.5	7.18	8.05	6.35	7.53	8.15	8.57	7.79	8.32	6.84	8.51	7.13	8.61
C1000	IE01											6.91	7.6	6.18	7.21	7.82	8.33	7.55
C1000	IE02											7.25	8.14	6.36	7.61	8.23	8.63	7.85
C1000	IS												2.66	3.86				3	4	2.67	2.5	2.58	2.85
C1000	IT	4.96	4.77	4.89	4.19	5.38	5.32	5.26	5.08	5.36	4.94	5.16	6.18	5.07	5.28	5.78	5.38	5.64	5.14	5.26	5.24	5.56	5.5
C1000	ITC	8.36	8.56	8.19	7.38	8.78	8.68	8.53	8.24			7.93	8.4	4.46	7.91	9.46	8.23	8.23	7.94	8.13	8.41	8.83
C1000	ITC1	7.17	7.01	6.35	6.15	7.12	7.09	7.14	7.17			6.14	6.6	8.02	8.05	8.88	7.92	7.82	7.45	7.55	8.4	8.69
C1000	ITC2	3	2	2								5.33	4.25	4	4.67		6.33	5.67	5.25	6.33	4.67	4
C1000	ITC3	4.58	3.93	4.29	3.31	4.27	4.4	4.5	3.22			3.17	3.25	3.23	3.43		3.26	3.3	2.84	3.27	3.19	3.19
C1000	ITC4	9.45	9.87	9.68	8.42	10.11	9.98	9.71	9.18			9.57	10.15		7.78	10.06	8.55	8.66	8.47	8.74	8.43	8.99
C1000	ITD	8.09	7.91	8.04	6.33	8.29	8.07	7.33	7.45			7.55	8.37	6.58	7.55	8.62
C1000	ITE	4.24	3.77	4.07	3.25	4.46	4.42	4.37	4.31			4.36	4.75	4.38	5.06	4.38
C1000	ITF	2.65	2.28	2.78	2.22	3.02	3.01	3.03	2.52			2.84	3.11	3.09	3.33	3.07	3.08	3.41	2.99	3.06	3.06	3.12
C1000	ITF1	4.08	4.21	4.01	3.79	4.46	4.4	4.44	3.7			4.4	4.35	3.98	4.27	4.16	4.14	4.14	4.17	3.91	4.07	4.13
C1000	ITF2	2.72	2.76	2.83	2.74	2.8	2.59	2.98	2.97			3.16	3.05	2.73	2.3	2.78	2.77	2.86	3.58	3.56	3.6	3.68
C1000	ITF3	3.31	3.28	3.72	3.22	3.66	3.75	3.71	3.34			3.33	3.69	4.01	4.54	3.24	3.98	3.86	3.57	3.91	3.63	4.02
C1000	ITF4	2.65	1.62	2.71	1.78	2.94	2.65	2.69	1.99			2.44	2.88	2.59	2.5	2.92	2.75	3.49	2.61	2.72	2.77	2.75
C1000	ITF5	1.9	1.96	2	1.7	2.57	3.08	2.83	2.55			2.57	2.82	3.41	2.34	2.94	2.95	2.93	2.71	2.74	2.74	2.74
C1000	ITF6	2.15	2.36	2.54	2.22	2.6	2.77	2.81	2.52			2.68	2.66	2.64	2.89	2.86	2.87	2.88	2.8	2.84	2.84	2.9
C1000	ITG	1.98	1.99	1.25	2.2	2.53	2.1	2.31	2.48			2.51	2.65	2.71	2.22	2.67	2.83	2.78	2.82	2.79	2.79	2.82
C1000	ITG1	2.25	2.1		2.54	2.72	2.33	2.6	2.79			2.66	2.8	2.76	2.56	2.75	2.88	2.74	2.84	2.8	2.74	2.78
C1000	ITG2	1.35	1.69	1.29	1.34	2.06	1.59	1.63	1.69			1.73	1.89	2.44	1.98	2.26	2.6	2.93	2.74	2.77	3.1	3.11
C1000	ITH1			3.5	3.5	3.5	3.5	3.5	3.5			3.7	3.95	3.59	3.67		3.73	3.73	3.73	3.73	3.77	3.52
C1000	ITH2			4	3	3.67	3	3.67	2.75			3	3.47	2.82	2.88		3.22	4.31		4.89	4.46	4.62
C1000	ITH3	9.33	9.14	8.91	6.6	9.67	9.39	7.64	8.5			8.31	8.9	6.26	8.08	10.61	8.7	8.47	8.14	8.24	7.35	9.21
C1000	ITH4	9.26	9.35	9.49	6.45	6.7	7.2	8.23	9.09			7.2	8.09	8.5	8.23	6.82	10.08	9.67	9.63	9.46	9.04	9.64
C1000	ITH5	6.69	6.38	6.72	6.04	7.4	7.02	6.72	5.89			6.95	7.95	6.33	6.74	7.23	7.02	7.37	7.15	7.07	6.65	7.12
C1000	ITI1	3.76	3.26	3.57	2.4	3.93	3.89	3.63	3.77			3.62	3.96	3.56	4.3	3.86	3.75	3.75	2.99	3.53	3.62	3.81
C1000	ITI2	5.34	4.96	5.19	4.46	5.7	5.79	5.8	6			6.4	6.43	6.35	6.47	6.02	6.58	5.1	4.75	5.42	5.79	5.18
C1000	ITI3	4.15	3.81	4.27	3.93	4.35	4.29	4.31	3.94			3.88	4.15	4.61	4.07	4.1	4.7	4.55	4.34	4.37	4.48	4.48
C1000	ITI4	4.15	3.43	3.66	2.49	4.5	4.11	4.23	4.04			4.11	4.45	3.36	4.51	3.76	4.22	4.54	3.77	4.22	4.22	4.07
C1000	LT	2.71	2.51	2.77	3.04	3.25	2.94	1.93	3.01	3.35	3.45	2.76	3.03	4.02	3.69	3.98	4.58	3.86	4.23	3.18	3.86	4.73	3.94
C1000	LV	2.2	2.09	2.48	2.18	2.43	2.8	2.26	2.94	3.1	3.08		2.74	3.77	3.37	3.49	4.51	3.83	4.25	3.03	4.31	4.66	3.9
C1000	ME								1.92	3.1	3.19	3.16	3.22	2.54	3.76	3.39	3.08	3.24	3.25	3.27	3.12	3.17
C1000	MK	2.52	2.25	2.88	2.38	3.57	3.17	3.17	2.73	3.48	3.33	3.24	3.4	2.75	3.29	3.81	2.93	3.79	2.73	3.64	3.46	3.58	3.51
C1000	MT
C1000	MTZ
C1000	MTZZ
C1000	NL	7.85	7.72	7.65	8.3	8.43	8.18	7.79	7.14	8.28	8.93	8.11	7.37	8.02	8.27	8.69	8.33	7.5	8.46	7.91	8.65	7.92	7.88
C1000	NL1	7.05	6.97	6.26	7.27	7.09	8.51	6.87			8.15	7.58	6.71	7.62	7.73	8.16	7.66	7.29	7.8	7.69	7.86	7.38
C1000	NL11	7.48	7.48	6.67	7.71	7.62	8.51	7.38			8.61	7.99	6.97	7.9	7.8	8.62	8.12	7.42	8.22	8	8.28	7.68
C1000	NL12	7.74	7.11	6.25	7.55	7.09	8.51	7.58			8.31	8.62	6.69	7.38	8.04	8.15	7.66	7.45	8.48	8.33	8.8	7.81
C1000	NL13	6.04	5.98	5.43	6.32	5.96	8.51	5.58			7.08	6.12	6.02	7.02	7.32	6.93	6.46	6.86	6.3	6.54	6.25	6.3
C1000	NL2	7.69	6.85	6.07	7.97	8.09	8.51	7.3			8.8	8.1	7.58	8.12	8.47	8.5	8.2	7.73	8.47	7.77	8.36	7.81
C1000	NL21	6.69	6.06	5.36	7.12	7.42	8.51	5.66			7.74	6.55	6.95	7.33	7.3	7.18	6.76	6.81	6.95	6.02	7.2	6.82
C1000	NL22	7.59	6.52	6.13	7.81	10.84	8.51	7.05			8.71	7.84	7.61	7.73	8.25	8.66	8.1	7.68	8.35	6.93	7.51	7.35
C1000	NL23	8.55	7.94	6.5	8.85	5.34	8.51	8.45			9.37	8.97	7.83	8.75	9.13	8.8	8.7	8.02	8.99	8.91	9.47	8.55
C1000	NL3	8.32	7.28	7.88	8.65	9.04	8.51	8.3			9.15	8.5	7.16	7.81	8.32	8.76	8.84	7.71	8.63	8.42	9.5	8.15
C1000	NL31	7.45	5.76	6.4	7.69	6.73	8.47	5.67			7.92	7.03	4.63	7.48	5.71	5.67	6.11	6.29	6.27	5.83	7.19	5.49
C1000	NL32	7.58	7.21	7.31	8.04	8.34	8.51	7.74			8.41	7.98	7.08	7.74	7.7	8.07	8.48	7.43	8.39	7.84	8.79	7.33
C1000	NL33	8.29	7.4	7.98	8.59	8.96	8.51	8.27			9.18	8.84	7.76	8.07	8.81	9.19	9.21	7.79	9.16	8.52	9.65	8.47
C1000	NL34	8.6	7.29	8.07	8.93	9.38	8.51	8.56			9.41	8.53	7.21	7.76	8.16	8.61	8.85	7.78	8.52	8.61	9.71	8.32
C1000	NL4	8.49	7.44	7.27	9.34	9.64	8.51	7.8			9.8	8.92	8.54	8.92	9.13	9.72	8.77	7.32	9.17	7.53	8.96	8.51
C1000	NL41	8.79	7.39	7.08	9.69	10.08	8.51	8.04			10.02	9.1	8.34	8.73	9.03	9.35	8.9	7.6	9.51	7.92	9.25	9.02
C1000	NL42	7.95	7.51	7.6	8.73	8.94	8.51	7.42			9.54	8.64	8.86	8.73	9.28	10.2	8.61	6.98	8.77	7.01	8.51	7.77
C1000	NO	3.96	3.72	3.49	3.94	4.4	4	3.67	3.86	4.36		3.96	3.39	3.65	3.33	4.31	4.75	4.6	4.51	2.62	4.65	4.68
C1000	PL	2.53	3.06	3.24	2.87	3.54	3.23	2.6	3.25	3.22	3.48	3.5	3.37	3.64	3.74	4.19	3.66	3.96	4.12	3.37	3.61	4.7	4.56
C1000	PL1	2.01	2.6	2.67	2.48	2.96	2.7	2.19	2.75	2.77	2.92	2.9	2.84	2.95	2.98	3.45	2.86	3.16
C1000	PL12	2	2.59	2.63	2.58	2.89	2.7	2.13	2.6	2.76	2.78
C1000	PL2	2.88	2.95	3.25	3.17	3.54	3.4	2.61	3.37	3.55	3.33	3.1	3.58	3.7	3.53	4.1	3.55	4.11	4.14	3.73	3.77	4.61
C1000	PL21	2.81	2.72	3.1	2.98	3.33	3.33	2.56	3.27	3.4	3.18	3.04	3.43	3.62	3.4	3.89	3.45	3.93	3.98	3.78	3.8	4.43
C1000	PL22	2.98	3.22	3.43	3.38	3.78	3.47	2.66	3.48	3.74	3.49	3.16	3.75	3.79	3.66	4.32	3.66	4.31	4.32	3.68	3.73	4.79
C1000	PL3	2.17	2.64	2.81	2.7	2.98	2.85	2.19	2.82	3.13	2.94	2.96	2.91	3.1	3.11	3.61	3.27	3.56
C1000	PL4	2.69	3.42	3.47	2.63	3.94	3.5	2.74	3.43	2.94	3.99	3.87	3.35	3.96	4.25	4.64	4.03	4.27	4.4	3.18	3.55	4.83
C1000	PL41	2.31	3.13	3.54	2.7	3.95	3.54	2.8	3.55	2.97	3.99	3.75	3.43	4.03	4.2	4.54	3.87	4.31	4.45	3.26	3.41	5
C1000	PL42	2.78	3.56	3.5	2.68	3.99	3.49	2.93	3.34	3.08	4.12	4.29	3.47	3.93	4.38	4.93	4.67	4.22	4.28	3.19	4.04	4.69
C1000	PL43	2.65	3.26	2.98	2.09	3.76	3.29	2.06	3.05	2.53	3.71	3.57	2.75	3.69	4.23	4.63	3.57	4.15	4.41	2.72	3.14	4.28
C1000	PL5	3.84	4.09	4.46	3.81	4.81	4.57	3.4	4.35	4.56	4.46	4.73	4.88	5.01	4.8	5.52	4.74	5.4	5.35	4.6	4.65	5.75
C1000	PL51	3.71	3.87	4.36	3.68	4.65	4.39	3.22	4.09	4.15	4.18	4.56	4.48	4.6	4.61	5.2	4.61	5.08	5.1	4.34	4.37	5.52
C1000	PL52	4.06	4.45	4.62	4.01	5.06	4.86	3.69	4.76	5.18	4.9	5	5.5	5.65	5.09	6.06	4.95	5.88	5.74	5	5.07	6.11
C1000	PL6	2.55	3.11	3.39	3.07	3.62	3.11	2.91	3.49	3.28	3.66	3.77	3.57	3.81	4.11	4.39	3.95	3.97	4.27	3.42	3.93	5.03
C1000	PL61	2.5	3.4	3.56	3.01	3.87	3.24	3.03	3.65	3.28	3.8	3.7	3.71	3.98	4.34	4.57	3.88	4.23	4.57	3.55	3.97	5.34
C1000	PL62	2.68	2.97	3.08	3.28	3.36	2.79	2.71	3.27	3.38	3.54	4.03	3.48	3.77	3.91	4.12	3.88	3.66	3.87	3.2	3.85	4.76
C1000	PL63	2.49	2.84	3.44	2.94	3.53	3.23	2.96	3.48	3.18	3.59	3.6	3.45	3.61	3.93	4.37	4.13	3.87	4.2	3.43	3.97	4.8
C1000	PL71	2.05	2.61	2.72	2.31	3.08	2.72	2.29	2.99	2.8	3.14	3.08	3.13	3.05	3.04	3.66	3	3.32	3.57	2.95	2.89	4.42
C1000	PL72	1.49	2.6	2.75	2.56	2.82	2.72	2.01	2.82	3.1	2.86	2.55	2.82	2.86	2.86	3.3	3.03	2.97	3.2	2.98	2.88	3.34
C1000	PL81	2.45	2.74	2.99	2.85	3.13	2.96	2.15	2.85	3.33	3.03	3.1	3.05	3.2	3.22	3.9	3.63	4.06	4.31	3.8	3.88	4.76
C1000	PL82	2.6	2.7	3.11	2.93	3.21	2.97	2.54	3.1	3.28	3.12	3.1	3.14	3.45	3.28	3.7	3.4	3.68	3.84	3.83	3.61	4.68
C1000	PL84	2.2	2.39	2.42	2.43	2.69	2.68	2.14	2.59	2.69	2.7	2.86	2.58	2.87	2.95	3.22	2.65	2.89	3.06	2.4	2.79	3.88
C1000	PT	2.68	2.47	2.79	2.46	2.81	1.85	3.06	3.22	3.47	3.1	3.11	3.87	3.87	4.18	4.29	4.41	4.26	4.56	4.71	5.11	4.85	5.13
C1000	PT1	2.69	2.49	2.81	2.47	2.82	1.86	3.07	3.22	3.46	3.09	3.1	3.87	3.87	4.13	4.44	4.63	4.45	4.77	4.82	5.19	4.89
C1000	PT11	2.42	2.33	2.38	2.27	2.33	1.95	2.18	2.21	2.24	2.15	2.16	2.4	2.34	2.42	2.54	2.47	2.46	2.5	2.84	3.43	3.46
C1000	PT15	1.59	1.72	1.72	1.59	1.6	1.15	1.84	2.21	2.2	1.89	1.87	2.04	1.27	1.84	2.47	2.4	2.58	2.7	2.16	1.72	1.93
C1000	PT16	3.38	3.1	3.15	3.15	3.25	2.98	3.77	3.95	3.91	4.13	4.49	5.37	4.93	5.19	5.43	5.53	5.69	6.21	5.47	6.17	6.47
C1000	PT17	4.8	5.46	5.14	7.66	7.32	7.32	7.49	8.26	9.08	6.11	8.04	9.22	8.93	10.25	7.76	7.81	6.76	7.24	6.6	7.11	6.01
C1000	PT18	2.55	2.31	2.79	2.21	2.75	1.32	3	3.14	3.45	3.01	2.92	3.8	3.94	4.21	4.54	4.85	4.52	4.84	5.1	5.28	4.72
C1000	RO	1.85	3	2.38	2.34	3.89	3.3	3.08		3.23	2.81	3.31	3.99	2.35	3.85	4.06	3.53	3.96	5.22	6	5.46	3.45	5.52
C1000	RO1	2.06	3.24	3.03	2.81	3.86	3.3	3.05	2.53	3.45	2.84	3.45	3.86	2.58	3.76	4.15	3.43	3.9	4.9	5.64	5.16	5.02
C1000	RO11	1.89	3.18	3.05	2.85	3.95	3.41	3.16	2.48	3.54	2.72	3.5	3.83	2.66	3.83	4.1	3.3	3.79	4.94	5.74	5.25	4.88
C1000	RO12	2.33	3.33	3.01	2.75	3.74	3.13	2.89	2.62	3.3	3.01	3.38	3.9	2.46	3.64	4.22	3.66	4.08	4.84	5.48	5.01	5.2
C1000	RO2	1.84	2.31	2.5	2.44	3.79	3.34	3.11		3.18	2.55	3.25	4	2.02	3.7	4	3.29	3.81	5.12	6.07	5.09	2.31
C1000	RO21		2.69	2.91	2.32	2.94	3.07	3.02		3.42	3.03	3.38	3.82	2.05	3.98	4.32	3.02	3.46	5	5.95	5.06	3.23
C1000	RO22	1.92	2.04	2.2	2.54	4.52	3.55	3.17		3.03	2.26	3.17	4.1	2	3.54	3.82	3.46	4.02	5.2	6.15	5.12
C1000	RO3	1.86	3.23	2.15	1.8	4.33	3.17	3.12		3.3	2.84	3.28	4.22	2.61	4.27	4.26	4.01	4.09	5.59	6.03	5.69	3.07
C1000	RO31	1.87	3.23	2.15	1.8	4.33	3.16	3.09		3.31	2.85	3.28	4.22	2.61	4.28	4.26	4.01	4.09	5.61	6.05	5.7	3.07
C1000	RO32		3.22	2.16	1.81	4.36	3.39	3.83		3.07	2.52	3.29	3.89	2.53	4.15	4.25	4.08	4.11	4.95	5.29	5.08	3.36
C1000	RO4		3.5	2.04	2.42	3.96	3.44	3.11		3.13	3.11	3.36	3.85	2.45	3.73	3.89	3.49	4.09	5.22	6.08	5.84	4.26
C1000	RO41		3.43		1.86	3.72	3.35	2.85		2.92	3.14	3.14	3.58	1.88	3.39	3.56	3.12	3.35	5.3	5.66	5.04	3.71
C1000	RO42	2.15	3.6	3.1	3.12	4.27	3.56	3.49	2.6	3.43	3.07	3.66	4.18	3.17	4.15	4.28	3.93	5.05	5.1	6.64	6.71	5.17
C1000	RS								3.74	5.12	5.28	5.43	5.31	3.7	5.17	5.97	4.8	6.18	3.97	6.15	6.14	6.58	5.78
C1000	SE	4.64	4.57	4.84	4.62	4.93	4.98	4.29	5.15	4.82	5.08	4.51	4.71	5.11	5.12	5.65	6.05	5.45	6	3.54	6.29	5.99	5.06
C1000	SE1	4.53	4.1	4.66	4.43	5.15		4.53	5.31	5.65	4.83	4.05	4.32	4.86	4.62	5.54	5.97	5.37	5.92	3.49	6.17	6.11
C1000	SE11	4.61	3.52	4.23	4.01	4.53		4.18	4.85	4.88	4.3	3.51	3.6	4.74	3.86	5.19	5.21	4.67	5.14	2.96	5.22	5.86
C1000	SE12	4.52	4.16	4.7	4.47	5.21		4.57	5.36	5.72	4.88	4.09	4.39	4.87	4.68	5.58	6.04	5.43	5.99	3.53	6.26	6.13
C1000	SE2	5.02	5.15	5.26	5.05	5.15		4.4	5.27	5.3	5.54	5.06	5.18	5.57	5.65	6.03	6.39	5.75	6.39	3.72	6.65	6.23
C1000	SE21	4.02	3.6	4.25	4	4.6		3.09	3.94	4.57	4.67	3.63	3.84	5.06	4.85	5.01	5.52	5.22	5.07	2.94	5.03	5.45
C1000	SE22	6.28	6.47	6.16	6.46	5.76		4.89	6.2	6.14	6.92	5.91	6.45	6.91	6.69	7.14	7.4	6.58	7.43	3.86	7.67	7.23
C1000	SE23	4.37	4.64	4.87	4.24	4.82		4.41	4.89	4.78	4.64	4.79	4.51	4.47	5	5.43	5.76	5.22	5.94	3.82	6.27	5.63
C1000	SE3	2.32	2.42	2.91	3	2.95		2.66	3.61	3.62	2.97	2.65	2.92	2.84	3.44	3.51	3.9	3.75	3.72	2.38	4.29	3.82
C1000	SE31	2.78	2.71	3.08	3.23	3.43		2.83	3.92	3.89	3.09	2.78	3.2	3.2	3.59	3.74	4.31	4	4.21	2.31	4.63	4.04
C1000	SE32	1.04	1.63	2.36	2.46	2.11		2.05	2.71	3.08	2.58	2.26	2.16	1.56	2.84	2.78	2.69	3.02	2.8	2.14	2.79	2.7
C1000	SE33	1.54	1.72	2.49	2.36	1.53		2.27	2.66	2.68	2.55	2.3	2.06	1.69	3.08	2.81	2.09	2.78	1.57	2.84	3.12	3.05
C1000	SI	4.82	4.75	6.14	4.02	5.84	6.03	5.13	5.36	5.49	5.28	6	6.4	5.78	4.62	6.5	6.31	6.49	5.56	6.07	6.51	7.39	6.87
C1000	SI01								5.47			6.15	6.55
C1000	SI02								4.46			5.01	5.48
C1000	SK	2.63	3.78	3.89	3.11	4.63	4.48	3.96	3.56	5.18	4.34	3.74	5.01	3.83	4.49	6.04	5.08	6.31	4.86	5.43	5.34	6.13	6
C1000	SK01	2.63	3.77	3.4	3.07	4.5	4.47	3.72	3.01	5.3	4.42	4.1	5.13	3.23	4.5	5.59	4.73	6.23	3.43	5.12	4.88	5.86
C1000	SK02	3.13	4.46	4.45	3.56	5.24	5.25	4.47	3.87	5.8	4.81	4.25	5.63	3.96	4.94	6.61	5.45	7.13	5	5.99	5.74	6.69
C1000	SK03	2.17	3.15	3.04	2.48	3.75	3.54	3.08	2.94	4.18	3.43	2.73	3.82	3.39	3.51	4.98	4.21	4.95	4.31	4.16	4.52	4.67
C1000	SK04	1.95	2.93	3.16	2.44	3.61	3.22	2.98	3.16	3.93	3.49	2.52	3.75	3.86	3.69	5.1	4.56	5.3	5.1	4.56	4.72	5.32
C1000	TR	2.29	2.11	6.92	1.71	3.82	5.49	5.71	2.32	2.4			2.91	2.91	3.2	2.74	3.25	3.1	3.28	3.17	3.21	3.36
C1000	TR1	1	1	1	1	1							3.81	4.38		4.22	4.27	4.39	4.77	4.67	4.84	4.37
C1000	TR2	1	1	1	1	1							3.18	3.99		4.19	4.95	4.19	3.93	3.67	4.45	4.18
C1000	TR21	1	1	1	1	1							3.37	4.59		4.58	5.4	4.48	4.19	3.83	4.77	4.36
C1000	TR22	1	1	1	1	1							2.88	3.03		3.49	4.14	3.64	3.44	3.37	3.8	3.82
C1000	TR3	1	1	1	1	1							2.82	2.98		3.07	3.63	3.08	3.16	3.12	3.14	3.17
C1000	TR31	1	1	1	1	1							4.26	4.94		5.56	6.56	5.35	4.87	4.68	4.53	4.85
C1000	TR32	1	1	1	1	1							3.34	3.75		3.75	4.45	3.63	3.51	3.62	3.92	3.89
C1000	TR33	1	1	1	1	1							2.54	2.59		2.65	3.13	2.71	2.91	2.86	2.82	2.88
C1000	TR4	1	1	1	1	1							3.1	3.15		2.98	3.54	3.48	4.35	3.55	3.6	3.66
C1000	TR41	1	1	1	1	1							2.82	2.82		2.48	2.95	3.25	4.38	3.36	3.4	3.41
C1000	TR42	1	1	1	1	1							3.76	3.89		4.29	5.1	4.11	4.26	4.08	4.19	4.36
C1000	TR5	1	1	1	1	1							3.07	2.69		2.52	2.98	3.12	3.69	3.37	3.6	3.54
C1000	TR51	1	1	1	1	1							2.66	2.46		1.89	2.23	2.77	2.45	2.5	2.7	2.85
C1000	TR52	1	1	1	1	1							3.32	2.83		2.87	3.4	3.33	4.55	3.83	4.06	3.89
C1000	TR6	1	1	1	1	1							3.73	3.64		3.94	4.66	4.22	4.34	4.34	4.17	4.4
C1000	TR61	1	1	1	1	1							2.7	2.52		2.46	2.91	2.41	2.79	2.64	2.67	2.78
C1000	TR62	1	1	1	1	1							4.14	4.5		4.66	5.51	5.13	5.35	5.4	5.21	5.42
C1000	TR63	1	1	1	1	1							4.12	4.37		4.48	5.29	4.81	4.45	4.78	4.6	4.83
C1000	TR7	1	1	1	1	1							2.59	2.31		2.01	2.38	2.55	2.5	2.66	2.55	2.63
C1000	TR71	1	1	1	1	1							2.74	2.44		1.96	2.32	2.7	2.75	2.95	2.86	2.83
C1000	TR72	1	1	1	1	1							2.47	2.2		2.05	2.42	2.43	2.3	2.43	2.3	2.48
C1000	TR8	1	1	1	1	1							2.77	2.44		2.36	2.79	2.66	2.69	2.7	2.93	2.85
C1000	TR81	1	1	1	1	1							1.64	1.85		1.75	2.06	1.58	1.54	1.62	1.64	1.86
C1000	TR82	1	1	1	1	1							2.15	2.01		2.39	2.85	1.71	1.55	2.42	2.62	2.55
C1000	TR83	1	1	1	1	1							3.04	2.62		2.41	2.84	3.18	3.4	2.86	3.09	3
C1000	TR9	1	1	1	1	1							1.39	1.63		1.3	1.54	1.82	1.84	1.85	1.73	1.98
C1000	TRA	1	1	1	1	1							1.66	1.79		1.71	2.03	1.83	1.7	1.96	1.78	2.12
C1000	TRA1	1	1	1	1	1							1.83	1.89		1.84	2.18	1.98	1.76	2.2	2.08	2.2
C1000	TRA2	1	1	1	1	1							1.53	1.71		1.61	1.91	1.7	1.65	1.75	1.53	2.06
C1000	TRB	1	1	1	1	1							1.73	1.64		1.52	1.8	1.85	1.99	2.08	2.08	2.18
C1000	TRB1	1	1	1	1	1							2.05	1.93		1.5	1.77	2.1	2.08	1.88	2.59	2.49
C1000	TRB2	1	1	1	1	1							1.48	1.4		1.54	1.82	1.64	1.91	2.23	1.7	1.95
C1000	TRC	1	1	1	1	1							3.25	3.61		3.2	3.79	3.43	3.73	3.51	3.61	4.33
C1000	TRC1	1	1	1	1	1							3.33	3.31		2.51	2.97	2.77	3.47	3.46	3.43	3.6
C1000	TRC2	1	1	1	1	1							3.1	3.66		2.98	3.53	3.22	3.4	3.29	3.5	4.47
C1000	TRC3	1	1	1	1	1							3.53	3.69		4.11	4.86	4.37	4.67	3.99	3.93	4.43
C1000	UK	7.16	6.29	7.08	7.08	7.05	7.19	7.28	6.63	7.42	7.03	6.91	6.95	6.17	6.56		7.94	6.94	7.15	6.71	7.85	6.29
C1000	UKC											6.95	7.14	5.95	5.83	7.35	8.13	6.92	7.17	6.87	8.47
C1000	UKD											5.32	5.72	4.72	5.37	4.94	8.12	6.92	7.14	6.88	6.05
C1000	UKE											7.15	7.49	6.64	6.77	7.83	8.09	7.21	7.14	6.88	8.36
C1000	UKF											7.4	7.46	6.24	7.19	7.97	8.09	6.94	7.14	6.88	8.09
C1000	UKG											6.78	6.9	6.03	6.27	7.46	8.09	6.93	7.14	6.88	7.86
C1000	UKH											7.15	6.52	6.99	7.27	8.55	7.97	6.87	7.15	6.87	8.36
C1000	UKI											6.63	7.62	6.3	5.63		8.35		6.59	6.72
C1000	UKJ											7.29	7.48	6.65	6.61	8.06	8.1	6.98	7.14	6.87	8.14
C1000	UKK											6.39	6.92	5.21	6.04	7.05	8.1	4.91	7.14	6.88	7.23
C1000	UKL	5.08										6.43	6.45	5.25	5.8	6.4	7.06	7	7.08	5.86	7.06
C1000	UKM	6.05										6.36	6.36	5.45	6.14	6.93	7.17	6.93	7.14	5.86	6.98
C1000	XK								2.88	3.8	3.43	3.59	3.59	3.2	3.81	3.5	3.29	4.18	3.96	3.57	3.7	4.24
C1100	AL	3.04	2.82	3.16	2.83	3.08	3.12	2.96	3.51	3.97	3.98	3.94	4.18	4.05		4.89	3.91	3.86		3.65	4.07	4.33
C1100	AT	4.44	5.21	4.94	4.35	5.89	5	4.88	4.75	5.66	4.93	5.01	5.85	4.14	5.37	5.92	5.66	6.19	4.83	4.65	5.74	5.92	5.53
C1100	BA	3.28	2.38	3.04	2.27	3.71	3.09	3.2	3.49	3.75	3.8	2.66	3.57	3.73	3.95	2.53	3.48	4.34	4.21	4.07	3.88	4.66	4.88
C1100	BE	7.87	8	8.22	8.63	8.9	8.33	8.22	7.75	8.56	9.34	8.85	8.36	8.39	9.15	8.98	9.33	6.64	8.56	8.49	9.34	8.95	7.78
C1100	BG	3.11	3.09	3.07	2.47	3.91	3.21	3.48	2.26	4.29	3.28	3.71	4.03	3.88	4.3	4.31	4.65	4.98	5.52	4.91	5.27	4.04	6.07
C1100	CH							5.93	6.04	6.23	6.1	5.83	6.38	5.83	5.5	6.31	6.06	4.42	6.16	5.72	5.82	6.29	5.74
C1100	CY		2.04	2.29	2.07				2.12		2.66	2.48	2.31	2.75	2.26		3.01				2.78	2.58
C1100	CZ	4.21	4.85	4.56	4.07	5.84	5.05	4.49	4.86	5.77	5.24	4.99	5.69	4.32	5.67	6.51	6.36	6.5	5.67	5.39	5.73	6.14	6.32
C1100	DE	7.28	7.88	6.91	6.5	8.17	7.47	7.2	6.96	8.09	7.81	7.21	7.01	7.33	8	8.63	8.09	7.64	7.64	6.67	7.4	7.82	7.3
C1100	EE	2.13	2.26	2.33	2.18	2.51	3.08	2.42	3.47	3.18	3.01	2.74	2.81	3.9	3.28	3.99	4.79	2.77	4.2	2.91	5.07	5	4.09
C1100	EFTA
C1100	EL	2.34	2.05	2.09	2	2.21	2.12	2.4	2.14	3.08	2.86	3.2	3.55	2.91	2.96	3.19	2.44	3.1	2.46	2.65	2.79	3.08	2.73
C1100	ES	3.17	2.35	2.9	2.77	3.34	1.81	2.94	3.65	3.4	2.76	3.12	3.35	2.43	3.73	3.05	3.05	3.63	2.44	4.03	3.15	4.25	4.09
C1100	EU	5.83	5.44	5.75	5.26	5.49	5.01	4.86	4.53	5.2	5.04		5.17	4.86	5.3		5.48	5.35	5.84	5.41	5.97	5.54	5.67
C1100	EU28	4.51	4.6	4.68	4.23	5.29	4.8	4.67	4.53	5.22	5.05		5.17	4.86	5.3		5.48	5.35	5.84	5.41	5.97
C1100	FI	3.58	3.36	3.25	3.52	3.3	3.75	3.6	3.96	3.63	4.12	3.48	3.9	3.95	3.87	4.13	4.16	3.88	4.18	2.82	4.63	3.45	3.24
C1100	FR	7.03	6.54	7.36	6.18	7.49	6.91	6.66	6.18	7.02	7.36	6.95	6.58	7.07	7.18	7.28	7.71	5.23	7.17	6.77	7.74	6.68	6.95
C1100	HR	4.8	4.46	4.65	3.26	4.99	4.16	4.64	4.69	5.55	5.25	4.09	5.28	5.41	4.94	4.19	5.41	5.65	5.88	5.44	5.61	5.87	6.7
C1100	HU	3.58	4.29	3.5	2.63	5.09	4.47	4.05	3.57	4.95	3.83	3.68	4.18	3.73	4.61	4.73	5.18	5.37	5.43	5.12	5.29	5.47	5.97
C1100	IE	8.81	8.59	7.92	7.99	9.24	8.04	8.76	7.68	8.12	7.65	8.23	9.26	6.69	8.66	9.48	10	8.98	9.46	8.37	9.38	7.77	10.05
C1100	IS												1	3.86				3	4	2.67	2.5	2.58	2.85
C1100	IT	3.16	2.77	3.09	2.72	3.63	3.59	3.69	3.37	3.83	3.49	3.66	3.79	4.08	3.95	3.9	5.38	4.31	3.95	3.9	3.84	3.92	4.22
C1100	LT	3.34	3.06	3.63	3.58	4.03	3.73	2.36	3.92	4.27	4.2	3.3	3.39	4.78	4.3	4.56	5.25	4.37	4.82	3.67	4.29	5.39	4.5
C1100	LV	2.7	2.71	3.38	2.79	2.94	3.61	2.78	3.59	3.86	3.63		3.06	4.37	3.89	3.75	5.03	4.3	4.79	3.43	4.81	5.34	4.48
C1100	ME								2.45	3.58	3.66	3.43	3.26	2.81	3.48	2.95	2.88	3.17	3.23	3.25	2.82	3.07
C1100	MK	2.48	2.11	2.67	2.2	3.56	3.12	3.04	2.43	3.45	3.11	3.08	3.38	2.73	3.23	3.8	2.79	3.88	2.78	3.44	3.53	3.57	3.5
C1100	MT
C1100	MTZ
C1100	MTZZ
C1100	NL	8.16	7.78	7.63	8.54	8.71	8.46	8.26	7.04	8.53	9.07	8.71	7.6	8.37	8.52	8.97	8.91	7.82	8.9	8.61	9.38	8.56	7.88
C1100	NO	4.56	4.03	4.05	4.56	4.71	4.85	4.12	4.35	4.87		4.54	3.81	4.06	3.83	4.86	5.7	4.58	5.23	2.62	4.65	4.68
C1100	PL	3.23	3.49	3.81	3.34	4.23	3.91	3.21	3.89	4.02	4.12	4.34	4.09	4.1	4.39	4.91	4.49	4.49	4.79	3.99	4.3	5.24	4.98
C1100	PT	2.68	2.47	1.85	2.46	2.81	1.85	2.47	1.93	2.38	3.1	3.11	3.87	3.87	4.18	2.14	4.41	2.44	4.56	2.59	2.7	2.77	2.77
C1100	RO	2.29	3.04	1.92	2.34	3.4	2.96	2.75		3.4	2.42	2.69	3.66	2.65	3.47	3.59	3.78	3.94	4.89	4.79	4.75	2.96	5.29
C1100	RS								3.74	4.3	4.08	3.37	4.21	3.98	4.26	3.95	4.12	4.85	4.09	4.57	4.39	4.94	5.75
C1100	SE	5.91	5.81	6.16	5.49	5.98	6.35	5.46	6.26	6.11	6.09	5.4	5.36	6.25	5.78	6.81	7.21	6.33	6.99	4.35	7.41	7.16	6.31
C1100	SI	4.25	4.6	4.89	3.45	4.53	4.7	4.19	4.16	4.53	3.96	4.8	5.18	5.44	4.35	5.23	5.11	5.19	5.03	4.38	5.23	5.8	5.77
C1100	SK	3.09	4.03	3.81	3	4.72	4.25	3.8	3.8	4.84	4.02	3.44	4.47	3.27	4.55	5.43	5.51	5.83	4.74	4.78	4.77	5.51	5.63
C1100	TR	2.23	2.03	2.1	2.09	10	10.75	5.71	2.13	2.2		2.09	2.69	2.67	2.84	2.4	2.87	2.8	2.92	2.83	2.89	3.08
C1100	UK	7.96	7.04	7.96	7.76	7.73	7.91	7.98	7.14	8.23	7.88	7.63	7.7	6.62	7.34	8.53	8.92	7.8	8.18	7.67	8.83	7.08
C1100	XK								3.39	4.07	3.48	3.76	3.76	3.35	3.85	3.6	3.39	4.1	3.98	3.46	3.55	4.24
C1110	AL	3.04	2.82	3.16	2.83	3.08	3.12	2.96	3.51	3.97	3.98	3.94	4.18	4.05		4	3.95	3.9	4.04	3.69	4.07	4.33
C1110	AT	4.54	5.27	4.98	4.39	5.95	5.05	4.88	4.82	5.7	4.99	5.04	5.9	4.19	5.39	5.98	5.73	6.26	4.9	4.69	5.8	6	5.6
C1110	AT1	4.17	5.08	4.68	4.1	5.79	4.77	4.7	4.39	5.5	4.76	4.81	5.55	3.64	5.19	5.49	5.43	6.11	4.28	4.3	5.41	5.64
C1110	AT11	3.52	4.32	4.13	3.62	5.17	4.05	4.27	4.22	4.96	3.95	4.5	4.15	3.88	3.93	4.73	4.61	5.35	4.11	4	5.03	5.13
C1110	AT12	4.33	5.26	4.81	4.22	5.94	4.96	4.81	4.44	5.64	4.97	4.9	5.88	3.59	5.5	5.68	5.63	6.31	4.33	4.38	5.5	5.76
C1110	AT13	4.08	4.72	3.77	4.21	5.91	3.69	4.47	3.91	5.28	4.14	4.14	5.38	2.75	5.26	4.8	5.48	6.35	3.81	4.42	5.31	5.61
C1110	AT2	5.87	6.01	5.59	5.03	5.04	5.42	5.22	4.66	4.79	5.16	5.15	6.08	5.64	5.17	6.53	6.14	6.69	6.63	5.31	6.47	6.35
C1110	AT21	5.68	5.12	5.01	4.83	4.4	4.55	5.23	4.42	4.42	4.67	4.85	5.14	4.77	5.32	5.24	5.72	5.6	6.57	5.77	6.17	6.14
C1110	AT22	5.86	6.24	5.79	5.1	5.21	5.69	5.23	4.84	4.94	5.39	5.3	6.6	6.09	5.1	7.07	6.29	7.09	6.66	5.16	6.59	6.47
C1110	AT3	5.82	5.97	6.2	5.57	6.93	6.33	5.65	6.82	6.69	5.92	6.08	7.39	6.45	6.31	7.99	6.86	6.73	7.03	6.09	7.26	7.38
C1110	AT31	5.83	5.98	6.21	5.58	6.94	6.35	5.68	6.84	6.7	5.94	6.1	7.41	6.47	6.32	8.02	6.88	6.75	7.06	6.11	7.29	7.4
C1110	AT32	4.63	4.97	5.45	4.95	5.95	5.45	4	5.45	7.45	3	4.13	5.68	4.09	4.79	5.54	5.92	5.48	3.96	6	5.54	6.04
C1110	AT33	6.45	5.45	4.95	4.45	4	2.5	3.5	3	7	4	5.13	4.77	5.17	5.15	4.71	4.08	3.58	4.6	5	5	4.5
C1110	AT34	3						1			2	3.14	3.38	3.25	3.78	3.56	3.08	3.13	3.57	3.47	3.06	3.25
C1110	BA	3.28	2.38	3.04	2.27	3.71	3.09	3.2	3.49	3.75	3.8	2.65	3.57	3.73	3.95	2.53	3.48	4.34	4.21	4.07	3.88	4.66	4.88
C1110	BE	7.87	8	8.22	8.63	8.9	8.33	8.22	7.75	8.56	9.34	8.85	8.36	8.39	9.15	8.98	9.33	6.64	8.56	8.49	9.34	8.95	7.78
C1110	BE2	7.88	7.73	8.25	8.94	9.01	8.47	8.43	7.68	8.67	9.57		8.36	8.59	9.39	9.02	9.84	6.91	8.86	8.61	9.71	9.14
C1110	BE21	6.75	6.59	7.21	7.25	6.97	7.24	7.08	5.76	6.96	6.64		7.95	7.94	8.33	7.78	7.91	5.18	7.57	6.48	7.91	7.18
C1110	BE22	8.16	8.86	8.84	9.28	9.35	8.77	8.66	8.2	8.82	9.76		9.44	9.05	10.56	9.6	9.99	6.41	8.76	8.71	9.55	9.24
C1110	BE23	7.95	7.4	8.16	8.65	8.9	8.68	8.25	7.4	8.41	9.66		7.68	8.42	9.32	9.05	9.6	6.72	8.89	8.68	9.92	9.21
C1110	BE24	7.73	8.2	8.15	8.55	8.75	8.16	8.24	7.57	8.46	9.31		7.95	8.67	9.5	9.11	9.56	6.37	8.73	8.48	9.41	9.12
C1110	BE25	7.94	6.94	8.24	9.29	9.2	8.52	8.64	7.85	8.91	9.76		8.62	8.55	8.89	8.78	10.2	7.65	9.06	8.74	10	9.2
C1110	BE3	7.86	8.1	8.24	8.46	8.78	8.27	8.08	7.79	8.5	9.22			8.29	8.98	8.96	9.09	6.5	8.41	8.44	9.16	8.86
C1110	BE31	8.24	8.81	8.58	8.65	8.52	8.41	8.71	8.33	8.63	9.47		7.76	8.33	9.26	9.28	9.36	6.84	8.97	8.64	9.37	9.34
C1110	BE32	7.88	7.79	8.12	8.6	9.02	8.44	8.06	7.6	8.56	9.44		8.69	8.62	9.04	8.91	9.39	6.5	8.75	8.65	9.48	9.01
C1110	BE33	8.34	9.09	8.86	9.06	9.4	8.74	8.59	8.4	8.99	9.52		8.83	8.59	9.67	9.58	9.4	6.77	8.92	8.8	9.51	9.59
C1110	BE34	5.52	5.72	5.79	5.94	5.7	5.72	5.79	5.4	6.39	6.48		5.97	6.06	6.66	6.73	6.31	4.6	5.83	6	6.58	6.23
C1110	BE35	7.6	7.78	8.18	8.08	8.59	7.96	7.7	7.63	8.29	8.94		8.04	7.81	8.55	8.79	8.76	6.45	7.58	8.15	8.71	8.28
C1110	BG	3.11	3.1	3.07	2.49	3.92	3.19	3.48	2.25	4.29	3.29	3.72	4.02	3.9	4.31	4.31	4.66	4.87	5.53	4.92	5.28	4.04	6.08
C1110	BG3											3.75	5.18	4.11	4.54	4.46	4.93	5.14	5.81	5.13	5.54	4.02
C1110	BG31											3.84	4.02	3.87	4.34	4.58	4.99		5.71	5.15		5.38
C1110	BG32											4.09	4.37	4.33	5.09	4.57	5.44	5.61	6.41	5.57		4.83
C1110	BG33											4.22	4.51	4.48	4.93	4.56	5.17		6.26	5.43	5.26	2.64
C1110	BG34											3.11	3.59	3.72	3.76	4.1	4.06	4.43	4.84	4.36	4.92	3.31
C1110	BG4											3.05	3.16	2.78	3.13	3.45	3.1	3.41	3.79	3.67	3.81	4.13
C1110	BG41				2.56							2.93	3.22	2.54	2.96	3.26	2.91	3.31	3.37	3.23		3.51
C1110	BG42											3.1	3.13	2.87	3.21	3.55	3.2	3.45	3.98	3.86		4.39
C1110	CH							5.93	6.04	6.23	6.1	5.82	6.37	5.82	5.49	6.31	6.06	4.42	6.16	5.72	5.82	6.3	5.76
C1110	CH01																4.54	4.47	6.22	5.78	5.9	6.4
C1110	CH02																4.5	4.43	6.18	5.72	5.82	6.28
C1110	CH03																4.42	4.36	6.06	5.64	5.73	6.22
C1110	CH04																4.5	4.41	6.15	5.71	5.8	6.3
C1110	CH05																4.51	4.42	6.17	5.7	5.79	6.31
C1110	CH06																4.37	4.29	6.07	5.6	5.7	6.12
C1110	CH07																4.62	4.32	6.32	5.64	5.96	6.27
C1110	CY		2.04	2.29	2.07				2.12		2.66	2.48	2.31	2.75	2.26		3.01				2.62	2.56
C1110	CYZ
C1110	CYZZ
C1110	CZ	4.21	4.85	4.56	4.07	5.84	5.05	4.49	4.86	5.77	5.24	4.99	5.69	4.32	5.67	6.51	6.36	6.5	5.67	5.39	5.73	6.14	6.32
C1110	CZ01	4.59	5.41	5.04	4.59	6.35	5.65	5.03	5.28	6.54	5.93	5.43	6.27	4.74	6.06	7.08	7.14	7.1	6.25	5.61	5.98	6.23
C1110	CZ02	4.18	5.01	4.66	4.28	5.96	5.2	4.68	5.02	6	5.47	5.12	5.83	4.51	5.77	6.7	6.59	6.65	5.92	5.45	5.83	6.14
C1110	CZ03	4.05	4.47	4.35	3.72	5.58	4.8	4.2	4.75	5.38	4.86	4.71	5.43	4.44	5.43	6.37	5.92	6.16	5.49	5.53	5.81	6.23
C1110	CZ04	3.7	4.27	4.56	4.28	5.87	5.08	4.58	4.9	5.89	5.42	5.13	5.75	4.52	5.76	6.73	6.55	6.67	5.93	5.44	5.82	6.12
C1110	CZ05	4.44	4.87	4.58	4.23	5.89	5.09	4.53	4.94	5.83	5.34	5.05	5.71	4.51	5.67	6.64	6.48	6.56	5.86	5.37	5.81	6.14
C1110	CZ06	3.93	5.12	4.49	3.87	5.81	4.97	4.34	4.62	5.64	5.03	4.89	5.59	3.77	5.63	6.13	6.13	6.37	5.18	5.18	5.45	6.09
C1110	CZ07	5.04	5.18	4.81	4.3	6.08	5.28	4.77	5.09	6.13	5.62	5.25	6.01	4.46	5.87	6.8	6.73	6.78	6	5.48	5.83	6.16
C1110	CZ08	4.39	4.43	4.52	3.98	5.73	5.01	4.42	4.86	5.65	5.14	4.88	5.56	4.31	5.52	6.46	6.2	6.33	5.6	5.39	5.72	6.02
C1110	DE	7.29	7.89	6.91	6.5	8.18	7.47	7.21	6.97	8.09	7.82	7.22	7.02	7.34	8	8.64	8.11	7.66	7.66	6.69	7.42	7.85	7.32
C1110	DE1	6.93	6.98	6.8	5.91	7.74	6.84		7.2	7.42	7.33	6.88	6.95	6.78	7.38	8.29	7.57	6.59	7.76	7.57	7.61	8.02
C1110	DE11				5.91
C1110	DE12				5.49
C1110	DE13				5.46
C1110	DE14				6.37
C1110	DE2	6.94	7.02	6.63	5.79	8.16	6.82	6.83	7.43	7.36	6.89	6.56	7.08	6.99	7.52	8.26	7.8	7.34	7.62	7.14	7.59	8.16
C1110	DE21				6.12
C1110	DE22				6.05
C1110	DE23				5.82
C1110	DE24				5.07
C1110	DE25				4.96
C1110	DE26				5.49
C1110	DE27				6.11
C1110	DE4	5.23	6.53	5.96	3.95	6.91	6.24	5.36	5.55	6.57	6.88	6.21	5.31	5.62	7.19	7.54	7.01	6.64	6.27	4.94	5.51	6.46
C1110	DE7	7.17	8.08	7.09	7	8.55	7.35	7.56	7.2	8.46	7.84	7.71	7.45	6.61	8.3	8.37	7.97	7.25	7.43	6.85	7.73	7.76
C1110	DE71				6.95
C1110	DE72				6.84
C1110	DE73				7.12
C1110	DE9	8.22	8.87	7.1	7.33	8.45	8.23	7.97	7.21	8.91	8.45	7.9	7.67	7.51	8.67	8.92	8.77	8.29	8.21	6.95	8.23	7.94
C1110	DE91				7.13
C1110	DE92				7.62
C1110	DE93				6.91
C1110	DE94				7.56
C1110	DEA	8.08	9.17	8.23	8.02	8.75	8.53	7.81	7.28	8.91	8.63	7.77	8.09	8.36	9.12	9.05	8.78	8.05	7.92	7.91	8.14	8.61
C1110	DEA1				8.12
C1110	DEA2				8.24
C1110	DEA3				7.7
C1110	DEA4				7.84
C1110	DEA5				8.24
C1110	DEB	6.67	7.19	6.85	6.01	7.53	6.33	7.01	6.34	7.42	7.47	6.96	6.04	6.52	7.73	7.16	7.36	6.56	6.88	7.4	7.3	7.62
C1110	DEB1				6.38
C1110	DEB2				6.34
C1110	DEB3				5.6
C1110	DED	6.46	7.18	6.2	4.92	8.09	7.41	6.13	6.86	7.64	7.17	6.9	6.6	6.82	7.01	8.81	7.95	8.09	7.46	6.5	7.05	7.68
C1110	DED2				4.59
C1110	DEE	7.13	7.68	6.3	6.45	8.32	7.23	6.88	6.93	8.36	8.09	7.48	6.63	7.72	7.83	8.71	7.34	8.45	7.48	5.91	6.05	6.91
C1110	DK01							6.68	6.44	7.55	7.39	6.63	5.85	7.5	7.13	7.71	7.8	7.23	8.41	5.26	8.31	8.12
C1110	DK02							7.56	7.06	8.7	8.79	7.24	6.85	8.14	8.16	8.59	8.68	8.09	8.53	6.47	8.96	8.76
C1110	DK03							7	6.28	7.76	7.87	6.76	6.18	7.27	7.32	7.68	7.84	7.02	8.17	6.29	7.95	7.84
C1110	DK04							11	10.59	12.09	12.51	6.41	6.43	7.08	6.69	7.43	7.6	6.65	8.08	5.98	7.81	7.96
C1110	DK05							6.33	6.21	7.27	7.46	5.64	6.22	6.44	6.54	6.96	7.18	6.56	7.62	6.1	7.45	7.71
C1110	EE	2.13	2.23	2.3	2.16	2.51	3.08	2.42	3.47	3.18	3.01	2.74	2.81	3.9	3.28	3.99	4.79	2.77	4.2	2.91	5.07	5	4.09
C1110	EFTA
C1110	EL	2.66	2.45	3.06	2.71	3.23	2.81	2.73	2.61	3.15	2.87	2.89	3.31	3.06	3.14	3.44	2.39	3.3	2.53	2.77	3.06	3.23	3.02
C1110	EL1								2.62	3.16	3.02	3.05	3.51	3.08	3.41	3.47
C1110	EL2								2.44	2.95	2.82	2.96	2.33	2.87	3.75	3.23
C1110	EL3		1									2.83	3		3.17	2					2.16
C1110	EL4	1.52	1.38	1.73	1.52	1.8	1.59	1.54	1.47	1.73	1.72	1.83	1.78	1.71	1.74
C1110	EL41	1.71	1.53	2	1.73	2	1.78	1.79	1.69	2	1.93	2.36	2.1	2	2
C1110	EL41_42								1.43	1.73	2.05	1.9	1.7	1.71	1.75	1.88
C1110	EL42	1.1	1	1.25	1.12	1.17	1.17	1	1.08	1.36	1.27	1.4	1.4	1.4	1.4	1.01	1.25	1.26	1.21	1.2	1.2	1.21
C1110	EL43	2	2	1.67	1.33	2	2	2	1.5	1.75	1.75	2.5	2	2.33	2	2.06	1.22	1.75	2	1.94	1.84	2
C1110	EL5	2.54	2.33	2.92	2.59	3.09	2.68	2.6	2.5	3.01	2.72	2.78	3.27	2.93	3.07	3.38	2.2	3.22	2.46	2.69	3.11	3.34
C1110	EL51	2.82	2.6	3.23	2.87	3.42	2.99	2.86	2.78	3.43	2.85	1.99	3.54	3.25	3.32	3.6	2.94	3.82	3.69	2.71	3.39	3.32
C1110	EL52	2.57	2.33	2.95	2.6	3.12	2.7	2.63	2.51	2.97	2.9	2.09	3.04	2.96	3.24	3.28	1.66	2.93	1.81	2.88	2.99	3.14
C1110	EL53	2.31	2.14	2.66	2.36	2.81	2.44	2.38	2.27	2.74	2.62	4.14	3.64	2.67	3.02	3.27	2.78	3.24	2.57	2.37	3.12	3.67
C1110	EL54	1.38	1.64	1.58	1.42	1.73	1.48	1.41	1.34	1.61	1.58	2.8	2.6	1.59	2.86	2.21	2.84	3.16	3.33	3.03	3.04	3.27
C1110	EL6	3.42	3.17	3.93	3.49	4.16	3.61	3.51	3.36	4.05	3.87	3.7	3.59	3.9	3.58	3.96	3.42	3.78	3.01	3.28	2.98	2.78
C1110	EL61	3.66	3.4	4.2	3.73	4.45	3.86	3.76	3.59	4.33	4.14	4.06	3.96	4.22	3.95	4.53	3.7	4.22	3.15	3.49	3.07	2.81
C1110	EL62	2.39	2.17	2.74	2.45	2.92	2.51	2.43	2.34	2.81	2.71	3.2	3.2	2.76	3.02	2.89	3.1	2.85	2.83	2.69	2.67	2.71
C1110	EL63	2.71	2.48	3.15	2.78	3.31	2.88	2.8	2.67	3.21	3.07	2.46	3.14	3.13	2.38	2.9	2.59	2.79	2.93	3	3.01	3.13
C1110	EL64	2.66	2.45	3.05	2.71	3.22	2.82	2.74	2.6	3.15	3.01	2.23		3.07	3.06	2.58	2.49	3.24	3.05	3.18	3.03	2.96
C1110	EL65	2.52	2.32	2.89	2.59	3.07	2.68	2.59	2.47	2.99	2.85	3.19	2.24	2.6	3.32	3.17	2.89	2.17	2.19	2.4	2.38	2.32
C1110	ES	3.69	2.46	3.23	3.15	3.66	2.32	3.04	3.84	3.79	2.82	3.46	3.59	2.75	3.98	3.14	3.1	3.92	2.38	4.13	3.21	4.4	4.34
C1110	ES1	2.85	2.99	3.15	2.95	2.91	3.02	3.98				3.07	3.04	3.18	2.53	3.19	3.17	2.52	2.47	2.72	2.82	2.77
C1110	ES11	2.86	3.01	3.13	2.97	2.9	3.03	3.99				3.1	3.06	3.29	2.53	3.19	3.2	2.52	2.47	2.75	2.86	2.79
C1110	ES12	2	2				1											1.6	1.4		2	2
C1110	ES13	2.4	1.8	3.75	2.3	3.32	3.32	3.28				2.52	2.55	1.29	2.53		2.54	2.54	2.56	2.35	2.22	2.36
C1110	ES2	4.35	3.16	3.9	3.81	4.47	4.32	3.74				4.35	3.45	3.46	4.41	3.9	3.64	4.79	4.02	4.45	4.48	4.85
C1110	ES21	5.38	4.92	6.03	4.9	4.66	5.52	5.28				6.09	6.45	6.45	5.2	5.2	5.41	6.71	6.24	5.72	7.02	7.28
C1110	ES22	4.97	4.19	4.73	4.63	4.49	5.33	5.11				4.85	4.39	4.53	4.55	4.94	4.46	5.72	5.13	5.22	5.62	5.62
C1110	ES23	5.02	3.17	4.46	4.57	5.13	4.46	4.34				4.65	4.77	4.3	5.63	4.69	4.17	5.66	3.91	5.49	5.18	5.66
C1110	ES24	3.52	1.96	2.53	2.58	4.03	3.05	2.26				3.44	2.7	2.26	3.94	3.01	2.93	3.83	3.07	3.63	3.34	4.02
C1110	ES4	3.72	2.26	3.05	3.03	3.51	2.02	2.74				3.3	3.8	2.67	3.91	2.92	3.03	3.98	1.92	4.08	2.91	4.42
C1110	ES41	3.97	2.25	3.07	3.24	3.73	2.29	2.77				3.71	4.18	3.03	4.37	3.27	3.41	4.58	1.82	4.29	3.03	4.71
C1110	ES42	3.08	1.99	2.72	2.61	3.02	1.24	2.57				2.4	3.06	2.07	3.12	2.07	2.13	2.61	2.14	3.25	2.72	3.8
C1110	ES43	4.52	3.56	4.49	2.48	2.92	1.85	2.93				2.22	2.73	1.52	2.06	2.13	2.17	2.08	2.51	4.52	2.12	3.3
C1110	ES5	3.11	2.73	3.96	3.16	3.85	1.77	2.62				4.4	4.01	3.56	4.76	3.66	2.99	3.81	3.39	4.4	3.32	4.69
C1110	ES51	3.37	2.87	4.16	3.35	4.07	1.73	2.69				4.5	4.07	3.6	4.94	3.84	3.1	4.05	3.57	4.64	3.54	4.96
C1110	ES52	1.76	2.06	3.02	2.81	2.46	1.9	2.27				2.54	2.73	1.94	2.98		1.97		2.15	2.55	1.77	3.1
C1110	ES53		1.23		1.34	2.92	2.2	1.81				3.56	3.73	4.28	2.36	1.88	1.69	1.67	1.54	1.98	1.57	1.8
C1110	ES6	2.43	2.68	2.98	2.97	3.61	1.47	3.87				2.44	2.98	1.33	3.17	3.34	2.74	1.66	2.64	3.86	3.09	3.51
C1110	ES61	2.74	2.85	3.21	3.3	3.92	1.58	4				2.45	3	1.3	3.19	3.39	2.81	1.69	2.76	4.05	3.2	3.53
C1110	ES62		1.25			1.47		1.22				2.39	2.25	1.94	2.72	1.41	1.26		1.23		1.47	3.16
C1110	ES64
C1110	EU	6.67	6.37	6.66	6.12	6.46	5.95	5.72	5.05	5.97	5.66		5.52	5.39	5.82	6.11	6.25	5.55	6.1	5.6	6.19	5.74	6.03
C1110	EU28	5.33	5.16	5.32	4.9	6.03	5.5	4.67	5.05	5.97	5.66		5.51	5.39	5.81	6.11	6.25	5.55	6.1	5.6	6.19
C1110	FI	3.58	3.36	3.25	3.52	3.3	3.75	3.6	3.96	3.63	4.12	3.48	3.9	3.95	3.87	4.12	4.16	3.88	4.18	2.82	4.63	3.45	3.24
C1110	FI1	3.32	3.41	3.24	3.53	3.45	3.75	3.6	3.98	3.62	4.12	3.48	3.9	3.95	3.88	4.12	4.16	3.88	4.17	2.83	4.63	3.45
C1110	FI13	3.18	3.23	3.02	2.75	2.44	2.95	3.42	3.21	3.04	3.02	2.71	3.06	2.68	3.21	3.22
C1110	FI19		3.38	3.56	3.72	3.65	3.76	3.68	3.89	3.87	4.06	3.91	4.12	4.06	4.16	4.04	4.47	4.05	4.11	3.23	4.84	3.45
C1110	FI1A	5	3.63	3.69	3.4	3.45	3.47	3	3.26	2	3.18	3.32	3.46	3.38	3.27	4.16
C1110	FI1B	3.58	3.41	3.2	3.51	3.43	3.78	3.61	4.05	3.62	4.19	3.17	3.48	3.7	3.75	3.99	3.97	3.46	3.96	2.61	4.24	3.59
C1110	FI1C	3.58	3.41	3.2	3.51	3.43	3.78	3.61	4.05	3.62	4.19	3.43	4.02	4.08	3.84	4.26	4.13	3.98	4.34	2.69	4.68	3.38
C1110	FI1D											2.95	3.21	2.9	3.23	3.5	3.71	3.6	3.14	3.11	4.32	3.57
C1110	FR	7.18	6.69	7.54	6.35	7.69	7.09	6.86	6.36	7.2	7.57	7.16	6.73	7.22	7.31	7.39	7.84	5.31	7.28	6.9	7.81	6.77	7.05
C1110	FR2	7.61	7.1	7.9	6.58	8.15	7.36	7.14	6.8	7.62	8	7.51	7.14	7.55	7.77		8.38	5.05
C1110	FR4	6.87	6.25	6.93	5.37	7.8	6.9	6.72	6.09	6.72	7.27	6.89	6.51	5.95	6.81		7.45	4.56
C1110	FR5	6.52	6.08	7.28	6.32	6.95	6.78	6.54	5.7	6.73	7.11	6.52	6	7.08	6.85		7.37	6
C1110	FR6	5.43	4.97	5.88	4.76	5.73	5.75	5.53	4.59	5.45	4.85	5.84	4.75	6.15	5.38		5.53	5.38
C1110	FR7	6.58	5.69	6.39	4.31	6.37	5.74	5.84	5.42	5.59	6.05	6.27	5.48	6.25	6.17		6	5.68
C1110	FR8	4.06	3.68	4.18	3.18	3.65	3.41	3.21	4.01	4.27	3.92	4.12	3.75	4.36	4.7		4.12	4.4
C1110	FR9
C1110	FR91
C1110	FRA
C1110	FRA2
C1110	FRA3
C1110	FRA4
C1110	FRB													7.27	7.02	7.37	7.54	4.4	7.08	6.78	7.5	5.87
C1110	FRC													6.46	6.38	6.2	7.04	4.06	6.75	6.46	6.88	5.88
C1110	FRC1	7.27	6.22	6.95	4.94	7.45	6.57	6.34	5.91	6.36	7.04	6.47	6.14	6.53	6.42	6.11	7.08	4.04	6.71	6.53	6.81	5.65
C1110	FRC2	6.9	5.87	7.16	5.41	7.8	6.59	6.61	5.88	6.15	6.95	6.78	6.54	6.11	6.17	6.62	6.86	4.15	6.95	6.1	7.26	6.98
C1110	FRD													7.99	8.16	7.96	8.77	6.22	8.33	7.62	8.86	7.54
C1110	FRD1	6.79	6.73	7.67	7.31	8.01	7.24	7.15	6.03	7.71	7.62	7.48	7.32	7.23	7.54	7.44	8.08	5.83	7.69	6.78	8.36	7.03
C1110	FRD2	7.88	7.33	8.44	7.87	8.81	7.89	7.77	7.39	9.07	8.99	8.63	8.38	8.6	8.62	8.37	9.32	6.54	8.83	8.28	9.24	7.91
C1110	FRE													8.06	8.95	8.85	9.59	5.74	8.62	8.36	9.34	8.71
C1110	FRE1	7.96	8.07	8.45	8.72	9.2	8.3	8.02	7.17	8.89	9.19	8.69	9.04	7.81	8.89	8.69	9.82	6.33	9.01	8.76	9.65	9.03
C1110	FRE2	8.17	8.21	8.55	7.82	9.05	8.01	7.98	7.5	8.87	9.06	8.3	7.82	8.2	8.99	8.93	9.47	5.42	8.42	8.15	9.17	8.53
C1110	FRF													6.84	7.52	7.79	8.34	4.91	6.96	7.26	7.66	7.78
C1110	FRF1	7.37	6.85	7.33	5.66	8.07	7.16	7.02	6.45	7.11	7.51	7.11	7.14	6.84	7.19	7.61	8.25	5.03	7.67	7.22	7.69	7.85
C1110	FRF2	8.11	7.73	8.05	6.71	8.72	7.79	7.51	7.4	7.26	8.27	7.86	7.69	7.36	7.94	8.42	8.86	5.1	7.52	7.66	8.16	8.26
C1110	FRF3	6.78	6.25	6.81	5.31	7.75	6.94	6.7	6.09	6.8	7.31	6.88	6.37	5.68	6.9	6.67	7.5	4.59	5.96	6.59	6.86	6.98
C1110	FRG													7.32	6.7	7.19	7.53	5.76	7.16	6.14	7.71	5.49
C1110	FRH													6.79	7.43	7.45	7.72	6.83	7.8	6.73	7.89	6.69
C1110	FRI													6.86	6.29	6.32	6.65	5.46	6.26	6	7.33	5.15
C1110	FRI1	5.28	4.93	6.12	5.29	5.99	6.13	5.81	4.81	5.21	5.02	6.25	5.01	6.44	5.71	5.11	5.75	5.38	6.09	5.3	7.15	4.71
C1110	FRI2	4.93	4.53	5.54	4.24	5.6	5.44	5.39	4.19	5.1	5.84	4.91	5.31	5.31	5	5.79	5.89	3.89	5.27	4.69	5.67	4.23
C1110	FRI3	6.69	5.96	7.21	6.03	6.51	6.53	6.11	5.82	6.44	6.61	6.02	4.97	7.06	6.54	6.66	6.94	5.61	6.38	6.29	7.5	5.34
C1110	FRJ													6.07	5.28	5.19	5.36	5.54	5.52	4.52	6.05	4.3
C1110	FRJ1	4.23	3.79	4.04	3.45	3.78	3.49	3.29	4.21	4.48	4.05	4.53	3.92	4.72	5.16	4.63	4.42	4.54	4.92	3.97	4.53	4.19
C1110	FRJ2	5.54	5.03	5.81	4.61	5.64	5.61	5.42	4.52	5.6	4.65	5.77	4.59	6.12	5.29	5.23	5.41	5.58	5.55	4.54	6.14	4.31
C1110	FRK													6.25	6.17	6.08	6	5.68	6.13	5.85	5.76	5.48
C1110	FRK1	6.75	5.81	6.2	4.14	6.44	5.77	5.78	5.26	5.47	6.45	6.35	5.36	6.3	6.46	6.27	5.91	5.51	5.78	5.74	5.07	5.29
C1110	FRK2	6.39	5.56	6.59	4.51	6.3	5.71	5.89	5.58	5.7	5.64	6.18	5.61	6.2	5.88	5.87	6.09	5.85	6.51	5.96	6.48	5.7
C1110	FRL													3.98	4.06	3.75	3.76	4.15	3.45	3.25	3.39	3.42
C1110	FRM													3.14	3.5	3.46	3.27	2.88	3.57	3.67	3.91	3.22
C1110	FRY
C1110	FRY1
C1110	FRY2
C1110	FRY3
C1110	FRY4
C1110	FRY5
C1110	HR	4.8	4.46	4.65	3.26	4.99	4.16	4.64	4.69	5.55	5.25	4.05	5.29	5.41	4.94	4.18	5.4	5.66	5.88	5.44	5.61	5.88	6.71
C1110	HR01											3.82	4.45
C1110	HR02											4.15	5.46	5.43	4.96	4.21	5.42	5.69	5.91	5.46	5.63	6.01
C1110	HR03											3.55	3.72	3.56	3.48	2.73	3.75	3.58	3.9	3.62	4.18	3.45
C1110	HR05														4.96	4.21	5.42	5.69	5.91	5.46	5.63	4.85
C1110	HR06														4.96	4.21	5.42	5.69	5.91	5.46	5.63	5.45
C1110	HU	3.59	4.29	3.5	2.63	5.09	4.48	4.05	3.57	4.96	3.83	3.69	4.18	3.73	4.61	4.73	5.09	5.38	5.45	5.14	5.33	5.5	5.99
C1110	HU1	3.1	3.8	2.76	1.76	4.52	4.37	4.02	2.77	4.74	3.1	3.19	4.14	2.84	4.22	4.58	4.8	4.7	5	4.76	4.84	4.64
C1110	HU11														3.98	4.12	4.55	4.37	5.41	4.85	5.22	4.04
C1110	HU12														4.25	4.64	4.83	4.75	4.95	4.75	4.79	4.64
C1110	HU2	4.05	4.47	4.2	3.03	4.93	4.69	4.54	3.89	5.21	4.38	4.12	4.51	4.13	4.96	5.36	5.41	5.95	5.53	5.46	5.78	5.9
C1110	HU21	4.1	4.4	3.96	2.55	4.82	4.76	4.58	3.6	5.09	4.01	3.97	4.38	3.52	4.67	5.06	5.34	5.78	5.1	5.4	5.47	5.42
C1110	HU22	3.64	3.9	3.73	2.98	4.73	4.28	4.15	4.13	4.78	4.28	4.22	4.53	3.99	4.67	5.19	5.15	5.62	5.13	5.08	5.73	5.85
C1110	HU23	4.36	5.01	4.84	3.49	5.19	4.99	4.86	3.92	5.63	4.78	4.16	4.61	4.79	5.46	5.73	5.7	6.34	6.17	5.81	6.06	6.31
C1110	HU3	3.33	4.24	3.11	2.44	5.26	4.34	3.72	3.44	4.82	3.55	3.43	3.93	3.54	4.41	4.3	4.88	5	5.45	4.94	5.04	5.26
C1110	HU31	2.88	4.01	2.53	2.14	4.74	4.45	3.72	3.12	4.66	3.54	3.48	3.88	3.11	4.24	4.45	4.73	5.09	5.37	4.91	5.42	5.19
C1110	HU32	3.27	4.29	2.96	2.38	5.16	4.26	3.37	3.24	4.82	3.32	3.16	3.73	3.52	4.3	4.41	4.83	4.86	5.5	4.83	5.12	5.26
C1110	HU33	3.62	4.31	3.53	2.64	5.6	4.36	4.01	3.77	4.9	3.77	3.65	4.15	3.82	4.6	4.1	5.03	5.08	5.45	5.05	4.76	5.31
C1110	IE	8.84	8.53	7.9	7.99	9.24	8.04	8.76	7.68	8.12	7.65	8.23	9.26	6.69	8.66	9.48	10	8.98	9.46	8.37	9.38	7.77	10.05
C1110	IE01											8.15	9.11	6.57	8.73	9.42	10.14	9.11
C1110	IE02											8.25	9.29	6.72	8.65	9.49	9.97	8.96
C1110	IE04														9.99	8.48	8.67	7.67	8.75	8.78	8.94	7.62
C1110	IE05														7.98	9.71	9.78	9	9.37	8.5	9.57	8.74
C1110	IE06														9.12	9.38	10.15	9.01	9.53	8.3	9.3	7.27
C1110	IS												1.2	3.86				3	4	2.67	2.5	2.58	2.85
C1110	IT	4.68	4.41	4.75	4.3	5.25	5.39	5.42	4.85	5.27	4.99	5.1	5.26	5.82	5.44	5.4	5.52	5.77	5.61	5.24	5.25	5.44	6.26
C1110	ITC	5.08	4.98	5	4.57	5.24	5.42	5.62	5.12			5.44	4.84	5.77	5.45	5.8	5.26	6.21	5.58	4.93	5.75	5.54
C1110	ITC1	4.96	4.87	4.56	4.27	4.79	5.03	5.27	5.06			5.21	4.76	5.62	5.96	5.77	5.06	6.2	4.92	4.44	5.83	5.26
C1110	ITC2											1	1	1	2		1	1	2	2	2	2
C1110	ITC3	3.3	3.21	3.3	2.97	2.97	2.97	3.63	2.97			2.61	2.37	2.21	2.56		2.39	2.65	2.56	2.81	2.71	2.81
C1110	ITC4	5.41	5.26	5.64	5.04	5.9	6.01	6.16	5.2			5.78	5.01	6.03	4.74	5.84	5.54	6.24	6.56	5.57	5.65	5.88
C1110	ITD	5.53	5.04	5.58	5.13	6.19	6.41	6.39	5.22			5.66	6	6.8	6.17	6
C1110	ITE	4.2	3.83	3.96	3.42	4.77	4.61	4.58	4.81			5.25	5.22	5.27	5.04	5.09
C1110	ITF	2.92	3.01	3.04	3.01	3.24	3.32	3.36	2.94			3.31	3.36	6.73	3.31	3.18	3.3	3.53	3.33	3.26	3.35	3.47
C1110	ITF1	3.86	4.28	3.93	4.15	4.62	4.32	4.42	3.44			4.42	4.24	4.06	4.47	4.49	4.37	4.47	4.46	3.9	4.12	4.12
C1110	ITF2	2.82	2.92	3.46	3.29	3.52	3.42	3.4	3.41			2.72	3.1					3.07	3.82	3.82	3.82	3.77
C1110	ITF3	2.93	2.78	3.21	2.9	3.22	3.33	3.46	3.26			3.05	3.19	3.79	3.59	3.13	3.92	3.67	3.31	3.57	3.35	3.85
C1110	ITF4	1.92	1.15	1.52	1.26	1.74	1.52	2.5	2.36			2.2	2.69	2.25	2.49	2.28	2.27	2.94	2.26	2.38	2.7	2.68
C1110	ITF5	1.98	1.98				3.13	2.8	2.54			2.05	2.62		2.66	2.62	2.68	2.74	2.72	2.67	2.74	2.74
C1110	ITF6	2.21	2.31	2.24	2.33	2.39	2.21	2.36	2.25			2.66	2.53	2.55	2.73	2.93	2.9	2.91	2.75	2.87	2.87	2.96
C1110	ITG	2.47					2.31	2.52				2.85	2.43	2.5			2.61	2.38	2.42	2.51	2.55	2.34
C1110	ITG1	2.47					2.31	2.52				2.85	2.43	2.5			2.42	2.42	2.47	2.47	2.54	2.59
C1110	ITG2																4.5	2.88	2	2.67	2.55	2.21
C1110	ITH																6.37	6.64	7.09	6.32	5.87	6.39
C1110	ITH1			2	2							4		3.67	4		4	4	4	4	4	3.5
C1110	ITH2																2.5	2.5	5	3.67	4	4.33
C1110	ITH3	5.95	5.32	5.29	5.03	6.09	6.5	6.8	6.14			5.89	5.83	7.06	6.77	6.55	6.64	6.46	7.36	6.45	5.65	6.59
C1110	ITH4	5.03	5.01	5.04	4.13	4.83	4.89	4.28	4.82				4.39	6.18	5.69	5.99	5.68	5.08	4.93	4.66	4.33	4.25
C1110	ITH5	5.47	4.99	5.68	5.19	6.27	6.43	6.31	4.87			5.82	6.22	6.7	5.84	5.69	6.26	6.91	7.14	6.38	6.15	6.41
C1110	ITI																5.69	4.46	3.97	4.43	4.46	4.37
C1110	ITI1	4.05	3.73	3.76	2.7	4	3.44	3.18	3.57			3.42	3.3	3.34	3.33	3.48	3.65	3.51	2.89	3.53	3.51	3.86
C1110	ITI2	4.65	4.33	4.28	3.87	5.7	5.73	5.76	6.04			6.46	6.43	6.74	6.49	6.4	6.82	5.14	4.61	5.36	5.52	4.92
C1110	ITI3	4.11	3.77	4.16	3.98	4.11	4.17	4.23	3.83			4.38	3.91	4.78	3.94	4.39	5.01	5	4.89	4.84	4.86	4.86
C1110	ITI4	3.45	2.81	3.06	1.92	3.54	3.34	3.34	3.56			2.9	3.41	3.04	2.86	3.23	4.09	4.27	4.06	4.18	3.96	3.86
C1110	LT	3.34	3.06	3.63	3.58	4.03	3.73	2.36	3.92	4.27	4.2	3.3	3.39	4.78	4.3	4.56	5.25	4.37	4.82	3.67	4.29	5.39	4.5
C1110	LT01														2.74	3.29	3.81	3.17	3.26	2.34	2.93	3.95
C1110	LT02														4.4	4.66	5.36	4.46	4.93	3.76	4.39	5.5
C1110	LV	2.7	2.71	3.38	2.79	2.94	3.61	2.78	3.59	3.86	3.63		3.06	4.37	3.89	3.75	5.03	4.3	4.79	3.43	4.81	5.34	4.48
C1110	ME								2.45	3.58	3.66	3.43	3.26	2.81	3.48	2.95	2.88	3.17	3.23	3.25	2.82	3.07
C1110	MK	2.48	2.11	2.67	2.2	3.56	3.08	3.01	2.4	3.41	3.08	3.04	3.35	2.7	3.2	3.75	2.75	3.84	2.75	3.4	3.48	3.53	3.5
C1110	MT
C1110	NL	8.16	7.78	7.63	8.54	8.71	8.46	8.26	7.04	8.53	9.07	8.66	7.53	8.41	8.54	9.03	8.91	7.82	8.9	8.61	9.38	8.56	8.02
C1110	NL1	7.81	8.04	7.13	8.1	8.1	8.39	7.68	6.95	8.23	8.83	8.51	7.26	8.43	8.21	8.87	8.53	7.84	8.76	8.38	8.8	8.31
C1110	NL11	7.93	8.18	7.32	8.26	8.33	8.39	7.91	7.11	8.59	9.13	8.65	7.68	8.46	8.34	9.15	8.71	7.88	8.84	8.52	8.9	8.48
C1110	NL12	8.52	8.32	7.24	8.16	8.26	8.39	8.11	6.91	7.9	8.78	9.32	6.41	8.27	7.96	8.43	8.23	7.98	9.16	8.78	9.4	8.29
C1110	NL13	6.59	6.97	6.01	7.05	6.63	8.39	6.11	6.2	6.66	7.12	6.67	6.13	7.04	7.83	7.67	7.77	7.34	7.62	6.99	7.14	7.08
C1110	NL2	8.28	7.63	6.57	8.6	8.33	8.39	8.28	7.27	8.57	8.99	8.72	7.7	8.68	9.09	8.63	8.66	7.87	9.07	8.73	9.31	8.65
C1110	NL21	6.66	6.11	5.76	7.09	6.59	8.4	6.54	5.82	7.14	6.99	6.46	6.29	6.38	6.36	5.4	6.85	6	6.21	6.44	7.25	6.4
C1110	NL22	7.9	6.89	6.57	7.86	13.73	8.39	7.99	6.52	8.35	8.44	8.03	7.32	8.56	8.08	8.68	7.84	6.95	8.21	7.94	8.5	8.05
C1110	NL23	8.75	8.29	6.7	9.34	5.13	8.39	8.77	7.96	8.89	9.71	9.43	8.53	9.02	9.36	9.11	9.2	8.41	9.68	9.31	9.93	9.2
C1110	NL3	8.58	7.8	8.2	8.91	9.37	8.39	8.62	7.1	8.75	9.39	8.89	7.66	8.39	8.68	9.18	9.26	7.94	9.05	8.78	9.88	8.72
C1110	NL31	7.5	6.1	6.64	9.27	8.55	8.3	7.62	5.22	8.78	8.13	8.43		5.89	3.92		7	7.58	8.47	8.06	8.86	7.96
C1110	NL32	7.92	7.74	7.69	8.38	8.71	8.39	8.26	6.58	8.48	8.79	8.48	7.35	8.05	8.52	9.18	9.07	7.76	9.29	8.38	9.25	7.87
C1110	NL33	8.44	7.75	8.21	8.75	9.21	8.4	8.45	6.74	9.08	9.33	9.13	8.26	8.04	9.4	9.24	9.57	7.99	9.5	8.8	10.01	8.84
C1110	NL34	8.83	7.87	8.39	9.18	9.69	8.39	8.85	7.48	8.67	9.63	8.89	7.62	8.2	8.51	9	9.2	7.96	8.77	8.9	10.02	8.92
C1110	NL4	7.77	7.29	7.91	8.16	8.4	8.39	8.11	6.81	8.51	8.85	8.28	7.56	8.51	8.67	8.95	9.08	7.33	8.65	8.51	9.44	8.5
C1110	NL41	7.99	7.04	7.87	8.37	8.63	8.39	8.25	6.54	8.69	9	8.54	7.53	8.28	8.39	8.77	9.14	7.9	8.98	8.68	9.65	8.45
C1110	NL42	7.47	7.74	7.99	7.77	8.01	8.39	7.89	7.26	8.18	8.69	7.79	7.6	8.98	9.09	9.27	8.98	6.4	8.12	8.22	9.08	8.58
C1110	NO	4.56	4.03	4.05	4.56	4.71	4.85	4.12	4.35	4.87		4.54	3.81	4.06	3.83	4.86	5.7	4.58	5.23	2.32	5.54	4.79
C1110	NO02															4.84	5.47	5.09		2.94		5.62
C1110	NO03															4.82	5.66	4.43		2.27
C1110	NO04																	3		0.71
C1110	NO06															3.84	4.41	3.09		3.01		3.6
C1110	NO07
C1110	NO08															5.12	6.1	4.75		1.99		4.55
C1110	NO09															5.12	6.1	4.75		1.99		5.02
C1110	NO0A																					2
C1110	NO0B
C1110	PL	3.23	3.49	3.81	3.34	4.23	3.91	3.21	3.89	4.02	4.12	4.32	4.06	4.07	4.36	4.88	4.49	4.49	4.79	3.99	4.3	5.24	4.98
C1110	PL1	2.62	3	3.16	2.99	3.59	3.31	2.72	3.4	3.44	3.57	3.56	3.48	3.4	3.6	4.02	3.33	3.47
C1110	PL2	3.04	3.01	3.3	3.13	3.66	3.5	2.64	3.48	3.68	3.43	3.3	3.74	3.72	3.62	4.23	3.82	4.2	4.34	3.94	3.95	4.57
C1110	PL21	2.9	2.77	3.11	2.89	3.36	3.4	2.47	3.29	3.44	3.23	3.14	3.46	3.55	3.31	3.83	3.51	3.85	4.03	3.73	3.78	4.21
C1110	PL22	3.29	3.46	3.66	3.58	4.21	3.65	2.93	3.82	4.08	3.76	3.51	4.14	3.97	4.05	4.76	4.27	4.69	4.74	4.22	4.21	5.11
C1110	PL3	2.75	2.88	3.28	2.99	3.37	3.19	2.55	3.25	3.6	3.35	3.5	3.38	3.43	3.42	4.11	3.93	4.25
C1110	PL4	3.3	3.92	4.03	3.04	4.66	4.18	3.35	4	3.81	4.73	4.82	3.97	4.24	5.02	5.39	4.98	4.64	4.99	3.65	4.18	5.24
C1110	PL41	3.46	4.14	4.13	3.21	4.79	4.33	3.42	4.29	3.85	4.64	4.5	4.04	3.99	4.8	5.12	4.66	4.59	4.96	3.79	4.05	5.41
C1110	PL42	3.29	3.8	4.08	3.01	4.67	4.2	3.55	3.9	3.97	4.95	5.35	4.12	4.49	5.26	5.86	5.64	4.75	5.11	3.65	4.61	5.18
C1110	PL43	2.72	3.53	3.41	2.29	4.19	3.67	2.48	3.4	3.24	4.4	4.47	3.36	4.25	5.21	5.36	4.3	4.51	4.74	3.06	3.47	4.64
C1110	PL5	4.07	4.17	4.47	3.83	5.07	4.82	3.74	4.6	4.98	4.71	5.17	5.1	4.96	5.05	5.71	5.31	5.49	5.6	4.8	5.08	5.74
C1110	PL51	3.89	3.95	4.28	3.66	4.81	4.59	3.51	4.29	4.5	4.45	5.04	4.72	4.41	4.77	5.3	5.09	5.25	5.28	4.42	4.62	5.52
C1110	PL52	4.41	4.58	4.83	4.16	5.53	5.2	4.16	5.16	5.76	5.18	5.38	5.71	5.87	5.55	6.45	5.73	5.9	6.17	5.47	5.91	6.11
C1110	PL6	3.37	3.63	4.1	3.78	4.47	4.05	3.81	4.27	4.29	4.43	4.6	4.35	4.36	4.82	5.18	4.85	4.38	4.96	3.97	4.68	5.76
C1110	PL61	3.11	3.78	4.14	3.42	4.49	3.92	3.66	4.25	4.11	4.41	4.39	4.27	4.05	4.78	5.15	4.45	4.25	4.93	3.76	4.4	5.63
C1110	PL62	3.36	3.43	3.83	4.01	4.28	3.83	3.6	4.03	4.27	4.14	4.81	4.13	4.32	4.47	4.74	4.82	4.13	4.57	3.73	4.53	5.47
C1110	PL63	3.73	3.62	4.31	4.01	4.66	4.45	4.2	4.54	4.57	4.78	4.67	4.72	4.73	5.2	5.66	5.43	4.82	5.34	4.48	5.19	6.19
C1110	PL7															4.04	3.49	3.4	3.91	3.38	3.33	4.46
C1110	PL71	2.54	2.92	3.08	2.69	3.61	3.28	2.75	3.6	3.37	3.74	3.78	3.8	3.3	3.59	4.31	3.56	3.49	4.18	3.42	3.4	5.13
C1110	PL72	2.57	2.69	3.09	2.77	3.15	2.97	2.16	3.17	3.53	3.24	2.75	3.08	3.08	3.07	3.67	3.39	3.28	3.53	3.33	3.25	3.67
C1110	PL8															4.19	4.02	4.41	4.66	4.24	4.19	5.13
C1110	PL81	2.99	2.99	3.45	3.13	3.49	3.35	2.6	3.31	3.76	3.46	3.66	3.56	3.54	3.6	4.47	4.33	4.89	5.15	4.63	4.67	5.63
C1110	PL82	2.79	2.79	3.2	2.95	3.39	3.04	2.71	3.26	3.45	3.27	3.71	3.23	3.46	3.29	3.7	3.48	3.47	3.78	3.66	3.62	3.91
C1110	PL84	1.83	2.83	2.84	2.68	3.04	3	2.43	2.92	3.06	3.05	3.28	2.99	3.2	3.24	3.55	3.19	3.18	3.38	2.82	2.95	4.32
C1110	PL9															3.82	3.18	3.46	3.61	3.14	3.42	4.31
C1110	PL91	2.68	3.06	3.22	3.2	3.57	3.33	2.69	3.27	3.49	3.45	3.4	3.16	3.46	3.6	4.05	3.37	3.67	3.61	2.9	2.74
C1110	PL92	2.68	3.06	3.22	3.2	3.57	3.33	2.69	3.27	3.49	3.45	3.4	3.16	3.46	3.6	3.79	3.16	3.43	3.61	3.17	3.5
C1110	PT	2.16	2.47	2.1	2.46	2.81	1.85	2.47	1.93	2.38	3.1	3.11	3.87	3.87	4.18	2.13	4.41	2.39	4.56	2.56	2.67	2.75	2.74
C1110	PT1	2.16		2.1				2.47	1.93	2.38						2.13		2.39		2.56	2.67	2.75
C1110	PT11	1.31	0.84	1.64	1.3	1.46	1.07	1.44	1.39	1.18	0.96	0.9	0.95	0.86	1.53	1.2	1.04	1.04	1.17	1.71	1.93	1.71
C1110	PT15
C1110	PT16	1.76	1.16	1.89	1.3	1.41	1.17	1.87	1.77	2.44	1.79	1.46	1.33	1	1.59	1.77	1.79	1.95	1.72	1.99	2.51	2.39
C1110	PT17	2.58	1.78	2.51	2.3	2.5	1.72	3.12	4.13	3.53	2.69	1.39	1.5	1.19	2.19	2.42	2.3	3.11	2.87	3.5	4.66	4.47
C1110	PT18	2.42		2.4				2.57	1.99	2.48						2.3	2.28	2.66	2.32	2.81	2.83	2.96
C1110	RO	2.29	3.04	1.92	2.34	3.4	2.97	2.75		3.4	2.42	2.69	3.66	2.65	3.47	3.59	3.78	3.95	4.89	4.8	4.75	2.96	5.3
C1110	RO1	2.15	3.04	2.82	2.51	3.64	3.13	2.67	2.44	3.37	2.49	2.85	3.64	2.84	3.6	3.78	3.83	3.54	4.26	4.26	4.07	3.82
C1110	RO11	2.06	3.04	2.82	2.61	3.81	3.17	2.78	2.38	3.44	2.23	2.93	3.62	2.97	3.82	3.85	3.9	3.38	4.27	4.28	4.04	3.81
C1110	RO12	2.27	3.04	2.82	2.4	3.42	3.09	2.54	2.52	3.28	2.79	2.76	3.66	2.65	3.31	3.7	3.74	3.8	4.26	4.21	4.1	3.83
C1110	RO2	2.06	2.47	2.09		2.83	3.01	2.98		3.48	2.26	2.72	3.64	2.35	3.21	3.45	3.53	4.05	4.88	4.85	4.44
C1110	RO21		2.89	2.69		2.34	3.02	2.92		3.21	2.62	2.69	3.37	2.31	3.17	3.34	3.03	3.6	4.31	4.13	4.03	2.93
C1110	RO22	2.18	2.29			3.18	3	3.01		3.57	2.15	2.73	3.73	2.36	3.23	3.49	3.7	4.21	5.06	5.1	4.59
C1110	RO3	2.62	3.33			3.53	2.77	2.73		3.53	2.33	2.63	3.83	2.67	3.78	3.76	4.05	4.11	5.11	4.89	5.1	2.92
C1110	RO31	2.63	3.34			3.54	2.77	2.72		3.54	2.33	2.62	3.83	2.67	3.77	3.75	4.04	4.11	5.13	4.9	5.12	2.91
C1110	RO32	2.47	3.08			3.35	2.85	3.17		3.37	2.22	3.06	3.79	2.85	4.17	4.04	4.23	4.16	4.58	4.27	4.6	3.35
C1110	RO4	2.24	3.33		2.06	3.57	3.05	2.63		3.19	2.68	2.66	3.52	2.95	3.38	3.5	3.77	3.83	4.92	4.86	4.96	3.66
C1110	RO41	2.1	3.27			3.31	2.95	2.39		4.93	2.61	2.48	3.22	2.4	2.83	3.2	3.33	3.31	4.74	4.72	4.75	3.33
C1110	RO42	2.51	3.44	2.96	3.04	4	3.25	3.11	2.74	3.44	2.81	2.99	4.03	3.87	4.34	3.98	4.45	4.66	5.28	5.1	5.25	4.37
C1110	RS								3.74	4.3	4.08	3.37	4.21	3.98	4.26	3.95	4.12	4.85	4.09	4.57	4.39	4.94	5.75
C1110	RS1																		4.63	5.32	4.94	5.17
C1110	RS11																		3.59	3.91	3.8	4.86
C1110	RS12																		4.73	5.45	5.06	5.2
C1110	RS2																		3.4	3.63	3.64	4.61
C1110	RS21																		3.65	3.98	3.82	4.79
C1110	RS22																		3.18	3.32	3.47	4.4
C1110	SE	5.91	5.81	6.16	5.49	5.98	6.35	5.46	6.26	6.11	6.09	5.4	5.36	6.25	5.78	6.81	7.21	6.33	6.99	4.35	7.41	7.16	6.31
C1110	SE1	5.35	4.94	5.57	4.72	5.82		5.34	6	5.89	5.41	4.71	4.56	5.85	4.88	6.47	6.93	6.01	6.52	4.22	7.03	7.11
C1110	SE11	5.42	4.55	5.26	4.45	5.63		5.02	5.49	5.1	4.64	3.91	3.83	5.92	3.75	6.1	6.17	5.48	5.81	3.65	6.27	6.84
C1110	SE12	5.35	4.98	5.6	4.75	5.85		5.37	6.05	5.97	5.49	4.78	4.63	5.85	4.97	6.5	6.99	6.06	6.58	4.27	7.1	7.13
C1110	SE2	6.43	6.48	6.65	6.2	6.11		5.6	6.56	6.4	6.69	5.92	6.05	6.68	6.51	7.21	7.59	6.68	7.53	4.57	7.83	7.33
C1110	SE21	5.34	4.69	5.78	4.96	5.57		4.34	5.34	5.61	5.68	4.6	4.44	6.28	5.77	6.01	6.79	6.13	6.08	3.72	5.94	6.35
C1110	SE22	7.4	7.39	7.34	7.34	6.7		5.7	7.39	7.41	8.03	6.44	7.27	7.63	7.37	8.22	8.31	7.52	8.29	4.66	8.63	8.17
C1110	SE23	5.51	5.8	5.94	4.98	5.47		5.82	5.74	5.27	5.27	5.59	5.01	5.13	5.43	6.45	6.99	5.85	7.16	4.78	7.57	6.75
C1110	SE3	3.88	3.07	4.65	4.47	4.62		4.28	4.7	4.26	3.14	4.05	3.98	3.96	3.75	4.84	5.28	4.45	4.97	2.59	5.56	4.96
C1110	SE31	3.88	3.07	4.65	4.47	4.62		4.28	4.7	4.26	3.14	4.03	4	4.05	3.77	4.92	5.33	4.51	5.02	2.59	5.63	5.04
C1110	SE32												5				3.64	3.29	3.83
C1110	SE33												2.5
C1110	SI	4.25	4.6	4.89	3.45	4.53	4.7	4.19	4.16	4.53	3.96	4.8	5.18	5.44	4.35	5.23	5.11	5.19	5.03	4.38	5.23	5.8	5.77
C1110	SI03								4.2	4.59	3.94	4.84	5.14	5.51	4.37	5.29	5.12	5.21	5.07	4.37	5.28	5.88
C1110	SI04								3.69	3.86	4.23	4.43	5.61	4.65	4.17	4.59	5.04	4.94	4.58	4.5	4.59	4.73
C1110	SK	3.09	4.04	3.83	3.02	4.78	4.28	3.82	3.82	4.86	4.03	3.46	4.5	3.3	4.58	5.47	5.52	5.86	4.8	4.79	4.82	5.55	5.59
C1110	SK01	3.16	4.21	3.55	3.06	4.82	4.09	3.67	3.58	5	3.9	3.61	4.79	2.86	4.62	5.1	5.12	5.64	3.71	4.35	4.63	5.24
C1110	SK02	3.57	4.52	4.22	3.42	5.24	4.74	4.31	4.22	5.4	4.32	3.96	5.12	3.36	5.19	5.94	6.07	6.39	5	5.23	5.19	6.13
C1110	SK03	2.54	3.39	3.11	2.42	4	3.61	3.15	3.07	4.19	3.58	2.74	3.58	3.01	3.58	4.82	4.53	4.84	4.36	4.02	4.43	4.55
C1110	SK04	2.18	3.12	3.44	2.3	4.07	3.63	2.96	3.33	3.93		2.67	3.53	3.44	3.72	4.81	4.84	5.1	4.78	4.31	4.28	4.86
C1110	TR	2.23	2.03	2.1	2.09	10	10.75	5.71	2.15	2.22		2	2.66	2.65	2.77	2.37	2.81	2.74	2.84	2.78	2.86	3.03
C1110	TR1												3.83	4.31		4.15	4.24	4.49	4.93	4.62	4.92	4.5
C1110	TR2												3.12	3.97		3.81	4.53	3.77	3.83	3.5	4	3.77
C1110	TR21												3.29	4.55		4.21	4.99	4.1	4.14	3.66	4.31	3.96
C1110	TR22												2.79	2.83		2.93	3.48	3.03	3.14	3.13	3.22	3.31
C1110	TR3												2.36	2.66		2.5	2.95	2.54	2.73	2.69	2.74	2.9
C1110	TR31												3.03	3.79		3.3	3.88	3.61	3.38	3.59	3.39	3.55
C1110	TR32												2.96	3.36		3.06	3.6	3.18	3.4	3.2	3.42	3.71
C1110	TR33												2.09	2.34		2.24	2.64	2.23	2.46	2.46	2.49	2.62
C1110	TR4												2.57	2.62		2.4	2.85	3.57	5.26	2.82	2.77	2.95
C1110	TR41												2.65	2.7		2.33	2.76	3.96	6.28	2.96	2.89	3.01
C1110	TR42												2.34	2.42		2.64	3.15	2.58	2.68	2.38	2.4	2.78
C1110	TR5												2.97	2.5		2.2	2.61	2.4	2.52	2.74	2.9	3
C1110	TR51												2.56	2.45		1.79	2.12	2.51	2.39	2.42	2.63	2.81
C1110	TR52												3.27	2.54		2.52	2.99	2.31	2.6	3.02	3.13	3.14
C1110	TR6												3.06	3.3		2.64	3.12	3.01	3.19	3.37	3.36	3.56
C1110	TR61												2.44	2.44		2.22	2.61	2.23	2.36	2.48	2.56	2.7
C1110	TR62												3.02	3.5		2.61	3.1	3.14	3.41	3.58	3.46	3.67
C1110	TR63												3.39	3.53		2.92	3.44	3.3	3.4	3.64	3.76	3.97
C1110	TR7												2.5	2.21		1.88	2.23	2.36	2.25	2.48	2.4	2.57
C1110	TR71												2.56	2.31		1.86	2.21	2.44	2.44	2.72	2.69	2.74
C1110	TR72												2.46	2.15		1.9	2.25	2.31	2.12	2.32	2.21	2.45
C1110	TR8												2.72	2.38		2.05	2.44	2.78	2.52	2.46	2.67	2.58
C1110	TR81												1.68	1.83		1.74	2.05	1.51	1.51	1.57	1.56	1.91
C1110	TR82												2.03	1.96		2.11	2.5	2.27	2.24	2.26	2.41	2.34
C1110	TR83												2.97	2.54		2.06	2.45	3.02	2.67	2.57	2.81	2.69
C1110	TR9												1.22	1.73		1.19	1.42	1.85	1.98	1.95	1.88	2.11
C1110	TRA												1.65	1.76		1.61	1.91	1.77	1.55	1.82	1.66	2.09
C1110	TRA1												1.72	1.87		1.7	2.01	1.93	1.66	2.04	1.96	2.09
C1110	TRA2												1.58	1.66		1.53	1.82	1.6	1.43	1.57	1.35	2.09
C1110	TRB												1.61	1.53		1.51	1.8	1.93	1.95	2.11	1.99	2.14
C1110	TRB1												1.94	1.8		1.51	1.8	2.61	2.02	1.87	2.47	2.46
C1110	TRB2												1.45	1.39		1.51	1.8	1.63	1.93	2.21	1.77	1.97
C1110	TRC												2.96	3.13		2.79	3.32	3.11	3.25	3.14	3.24	3.82
C1110	TRC1												3.22	3.03		2.29	2.7	2.65	3.45	3.38	3.44	3.7
C1110	TRC2												3.07	3.3		2.86	3.41	3.24	3.08	3.14	3.29	3.84
C1110	TRC3												2.6	2.93		3.01	3.57	3.15	3.5	2.99	3.03	3.83
C1110	UK	7.96	7.04	7.95	7.75	7.73	7.91	7.98	7.14	8.23	7.88	7.63	7.7	6.62	7.34	8.53	8.92	7.8	8.18	7.67	8.83	7.08
C1110	UKC											7.94	7.97	6.33	6.47	8.13	9.01	7.67	8.14	7.76	9
C1110	UKD											6.02	6.53	4.94	5.25	5.51	7.19	6.37	5.72	4.89	6.28
C1110	UKE											7.72	8.1	6.87	7.31	8.37	9.28	7.77	8.55	7.77	8.89
C1110	UKF											7.81	7.95	6.35	7.66	8.47	9.26	7.8	8.26	7.95	8.81
C1110	UKG											7.25	7.43	6.26	6.64	8.19	8.4	7.55	7.78	7.04	8.58
C1110	UKH											7.6	7.16	7.22	7.84	9.06	8.97	8.09	8.45	7.97	9.23
C1110	UKI											8.45	7.96	7.96	6.96
C1110	UKJ											7.82	8	7.02	7.22	8.74	9.03	7.71	8.33	7.97	9.17
C1110	UKK											7.24	7.98	5.53	6.73	8.01	8.04	7.44	7.79	7.65	8.29
C1110	UKL											7.12	7.38	5.66	6.56	7.76	7.1	7.39	7.44	6.77	8.03
C1110	UKM											8.22	8.07	6.62	7.46	9.02	8.37	8.32	8.06	6.74	8.62
C1110	XK								3.39	4.07	3.48	3.76	3.76	3.35	3.85	3.6	3.39	4.1	3.98	3.46	3.55	4.25
C1111	AL	3.04	2.82	3.16	2.83	3.08	3.12	2.96	3.51	3.97	3.98	3.94	4.18	4.05		4	3.95	3.9	4.04	3.69	4.07	4.33
C1111	AT	4.54	5.29	4.99	4.4	5.96	5.06	4.9	4.84	5.72	5	5.06	5.92	4.19	5.4	5.99	5.75	6.27	4.91	4.7	5.81	6.01	5.63
C1111	AT1	4.17	5.08	4.68	4.1	5.79	4.77	4.7	4.39	5.5	4.76	4.82	5.57	3.64	5.2	5.49	5.45	6.13	4.29	4.32	5.42	5.65
C1111	AT11	3.52	4.32	4.13	3.62	5.17	4.05	4.27	4.22	4.96	3.95	4.51	4.17	3.89	3.94	4.74	4.62	5.36	4.12	4	5.04	5.15
C1111	AT12	4.33	5.26	4.81	4.22	5.94	4.96	4.81	4.44	5.64	4.97	4.91	5.9	3.59	5.51	5.69	5.65	6.32	4.34	4.39	5.51	5.77
C1111	AT13	4.08	4.72	3.77	4.21	5.91	3.69	4.47	3.91	5.28	4.14	4.14	5.4	2.73	5.26	4.82	5.5	6.39	3.82	4.47	5.31	5.61
C1111	AT2	5.87	6.01	5.59	5.03	5.04	5.42	5.22	4.66	4.79	5.16	5.27	6.19	5.74	5.29	6.68	6.23	6.75	6.74	5.37	6.53	6.47
C1111	AT21	5.68	5.12	5.01	4.83	4.4	4.55	5.23	4.42	4.42	4.67	4.98	5.22	4.83	5.41	5.35	5.74	5.66	6.66	5.89	6.24	6.28
C1111	AT22	5.86	6.24	5.79	5.1	5.21	5.69	5.23	4.84	4.94	5.39	5.41	6.73	6.23	5.23	7.21	6.39	7.14	6.77	5.2	6.64	6.55
C1111	AT3	5.82	5.97	6.2	5.57	6.93	6.33	5.65	6.82	6.69	5.92	6.11	7.42	6.48	6.33	8.02	6.9	6.75	7.07	6.12	7.28	7.4
C1111	AT31	5.83	5.98	6.21	5.58	6.94	6.35	5.68	6.84	6.7	5.94	6.12	7.43	6.49	6.35	8.04	6.92	6.77	7.1	6.13	7.31	7.42
C1111	AT32	4.63	4.97	5.45	4.95	5.95	5.45	4	5.45	7.45	3	4.19	5.89	4.2	4.83	5.68	6.13	5.46	4.04	6	5.56	6.08
C1111	AT33	6.45	5.45	4.95	4.45	4	2.5	3.5	3	7	4	5.3	4.89	5.44	5	4.89	3.9	3.6	4.67	5.18	5.2	4.55
C1111	AT34	3						1			2	3.67	3.38	3.57	3.78	3.56	3.08	3.29	3.57	3.4	3.06	3.4
C1111	BA	3.28	2.38	3.04	2.27	3.71	3.09	3.2	3.54	3.74	3.84	2.65	3.57	3.73	3.95	2.49	3.54	4.35	4.25	4.09	3.88	4.66	4.91
C1111	BE	7.89	8.11	8.29	8.69	8.89	8.37	8.24	7.78	8.57	9.38	10.1	8.55	8.48	9.32	9.02	9.38	6.65	8.58	8.51	9.36	8.98	7.81
C1111	BE2	7.88	7.73	8.25	8.94	9.01	8.47	8.43	7.68	8.67	9.57		8.66	8.61	9.55	9.1	9.9	6.94	8.89	8.63	9.74	9.18
C1111	BE21	6.75	6.59	7.21	7.25	6.97	7.24	7.08	5.76	6.96	6.64		6.96	8.22	8.51	8.03	8.07	5.23	7.64	6.54	8.05	7.3
C1111	BE22	8.16	8.86	8.84	9.28	9.35	8.77	8.66	8.2	8.82	9.76		9.32	9.03	10.58	9.61	10.06	6.45	8.8	8.75	9.62	9.27
C1111	BE23	7.95	7.4	8.16	8.65	8.9	8.68	8.25	7.4	8.41	9.66		8.17	8.46	9.43	9.18	9.67	6.74	8.91	8.71	9.95	9.24
C1111	BE24	7.73	8.2	8.15	8.55	8.75	8.16	8.24	7.57	8.46	9.31		8.14	8.68	9.57	9.17	9.64	6.4	8.77	8.5	9.43	9.15
C1111	BE25	7.94	6.94	8.24	9.29	9.2	8.52	8.64	7.85	8.91	9.76		8.68	8.57	9.16	8.87	10.21	7.67	9.07	8.75	10.01	9.26
C1111	BE3	7.86	8.1	8.24	8.46	8.78	8.27	8.08	7.79	8.5	9.22			8.41	9.14	8.98	9.13	6.51	8.43	8.45	9.17	8.89
C1111	BE31	8.24	8.81	8.58	8.65	8.52	8.41	8.71	8.33	8.63	9.47		7.62	8.36	9.33	9.26	9.39	6.84	8.99	8.64	9.37	9.35
C1111	BE32	7.88	7.79	8.12	8.6	9.02	8.44	8.06	7.6	8.56	9.44		8.87	8.66	9.12	8.94	9.44	6.51	8.76	8.66	9.48	9.04
C1111	BE33	8.34	9.09	8.86	9.06	9.4	8.74	8.59	8.4	8.99	9.52		8.99	8.66	9.77	9.6	9.43	6.78	8.93	8.81	9.53	9.61
C1111	BE34	5.52	5.72	5.79	5.94	5.7	5.72	5.79	5.4	6.39	6.48		5.96	6.46	7.06	6.77	6.38	4.59	5.87	6.05	6.63	6.33
C1111	BE35	7.6	7.78	8.18	8.08	8.59	7.96	7.7	7.63	8.29	8.94		8.19	7.88	8.69	8.8	8.79	6.47	7.6	8.16	8.73	8.32
C1111	BG	3.11	3.1	3.07	2.49	3.92	3.19	3.48	2.25	4.29	3.29	3.72	4.02	3.9	4.31	4.31	4.66	4.88	5.53	4.92	5.28	4.04	6.08
C1111	BG3											3.75	5.18	4.11	4.54	4.46	4.93	5.15	5.81	5.13	5.54	4.02
C1111	BG31											3.84	4.02	3.87	4.34	4.58	4.99		5.71	5.15		5.38
C1111	BG32											4.09	4.37	4.33	5.09	4.57	5.44	5.61	6.41	5.57		4.83
C1111	BG33											4.22	4.51	4.48	4.93	4.56	5.17		6.26	5.43	5.26	2.64
C1111	BG34											3.11	3.59	3.72	3.76	4.1	4.06	4.44	4.84	4.36	4.92	3.31
C1111	BG4											3.05	3.16	2.78	3.13	3.45	3.1	3.41	3.79	3.67	3.81	4.13
C1111	BG41				2.56							2.93	3.22	2.54	2.96	3.26	2.91	3.31	3.37	3.23		3.51
C1111	BG42											3.1	3.13	2.87	3.21	3.55	3.2	3.45	3.98	3.86		4.39
C1111	CH							5.96	6.11	6.24	5.85	5.82	6.39	5.84	5.5	6.35	6.08	4.43	6.18	5.73	5.83	6.35	5.78
C1111	CH01																4.55	4.48	6.23	5.8	5.91	6.47
C1111	CH02																4.52	4.44	6.2	5.74	5.84	6.34
C1111	CH03																4.43	4.36	6.07	5.65	5.74	6.24
C1111	CH04																4.5	4.42	6.16	5.73	5.82	6.34
C1111	CH05																4.52	4.44	6.2	5.73	5.81	6.34
C1111	CH06																4.38	4.3	6.08	5.61	5.71	6.15
C1111	CH07																4.56	4.59	6.2	5.67	5.83	6.43
C1111	CY		2.04	2.29	2.07				2.12		2.66	2.48	2.31	2.75	2.26		3.01				2.62	2.56
C1111	CYZ
C1111	CYZZ
C1111	CZ	4.34	4.95	4.64	4.14	5.96	5.15	4.58	5.01	5.88	5.33	5.08	5.78	4.34	5.75	6.61	6.5	6.57	5.77	5.46	5.79	6.2	6.47
C1111	DE	7.32	7.92	6.94	6.55	8.21	7.51	7.24	6.98	8.13	7.84	7.25	7.06	7.4	8.03	8.68	8.15	7.69	7.69	6.77	7.45	7.88	7.35
C1111	DE1	6.93	6.98	6.8	5.91	7.74	6.84		7.2	7.42	7.33	6.9	6.98	6.83	7.41	8.35	7.63	6.61	7.78	7.61	7.62	8.06
C1111	DE2	6.94	7.02	6.63	5.79	8.16	6.82	6.83	7.43	7.36	6.89	6.58	7.1	7.01	7.54	8.28	7.83	7.36	7.63	7.18	7.61	8.18
C1111	DE4	5.23	6.53	5.96	3.95	6.91	6.24	5.36	5.55	6.57	6.88	6.27	5.38	5.72	7.27	7.64	7.08	6.69	6.35	5.03	5.55	6.52
C1111	DE7	7.17	8.08	7.09	7	8.55	7.35	7.56	7.2	8.46	7.84	7.73	7.48	6.65	8.35	8.46	8.06	7.29	7.46	6.92	7.79	7.83
C1111	DE9	8.22	8.87	7.1	7.33	8.45	8.23	7.97	7.21	8.91	8.45	7.93	7.72	7.66	8.72	8.96	8.81	8.33	8.24	7.05	8.26	7.98
C1111	DEA	8.08	9.17	8.23	8.02	8.75	8.53	7.81	7.28	8.91	8.63	7.79	8.13	8.44	9.15	9.08	8.8	8.07	7.94	7.98	8.17	8.66
C1111	DEB	6.67	7.19	6.85	6.01	7.53	6.33	7.01	6.34	7.42	7.47	6.98	6.07	6.56	7.77	7.22	7.41	6.57	6.9	7.43	7.33	7.65
C1111	DED	6.46	7.18	6.2	4.92	8.09	7.41	6.13	6.86	7.64	7.17	6.93	6.63	6.85	7.02	8.84	7.98	8.11	7.51	6.54	7.07	7.71
C1111	DEE	7.13	7.68	6.3	6.45	8.32	7.23	6.88	6.93	8.36	8.09	7.5	6.67	7.74	7.84	8.73	7.37	8.47	7.5	5.94	6.07	6.93
C1111	DK01							6.68	6.44	7.55	7.39	6.63	5.85	7.5	7.13	7.83	7.8	7.23	8.41	5.26	8.31	8.12
C1111	DK02							7.56	7.06	8.7	8.79	7.24	6.85	8.14	8.16	8.67	8.68	8.09	8.53	6.47	8.96	8.76
C1111	DK03							7	6.28	7.76	7.87	6.76	6.18	7.27	7.32	7.75	7.84	7.02	8.17	6.29	7.95	7.84
C1111	DK04							11	10.59	12.09	12.51	6.41	6.43	7.08	6.69	7.52	7.6	6.65	8.08	5.98	7.81	7.96
C1111	DK05							6.33	6.21	7.27	7.46	5.64	6.22	6.44	6.54	7.01	7.18	6.56	7.62	6.1	7.45	7.71
C1111	EE	2.37	2.25	2.66	1.77	2.87	3.64	2.76	4.1	3.83	3.22	2.93	3.01	4.66	3.07	4.29	5.3	2.86	4.7	3.41	5.65	5.54	4.59
C1111	EFTA
C1111	EL	2.66	2.45	3.06	2.71	3.23	2.81	2.73	2.61	3.15	2.87	2.89	3.31	3.06	3.14	3.44	2.39	3.3	2.53	2.77	3.06	3.23	3.02
C1111	EL1								2.62	3.16	3.02	3.05	3.51	3.08	3.41	3.47
C1111	EL2								2.44	2.95	2.82	2.96	2.33	2.87	3.75	3.23
C1111	EL3		1									2.83	3		3.17	2					2.16
C1111	EL4	1.52	1.38	1.73	1.52	1.8	1.59	1.54	1.47	1.73	1.72	1.83	1.78	1.71	1.74
C1111	EL41	1.71	1.53	2	1.73	2	1.78	1.79	1.69	2	1.93	2.36	2.1	2	2
C1111	EL41_42								1.43	1.73	2.05	1.9	1.7	1.71	1.75	1.88
C1111	EL42	1.1	1	1.25	1.12	1.17	1.17	1	1.08	1.36	1.27	1.4	1.4	1.4	1.4	1.01	1.25	1.26	1.21	1.2	1.2	1.21
C1111	EL43	2	2	1.67	1.33	2	2	2	1.5	1.75	1.75	2.5	2	2.33	2	2.06	1.22	1.75	2	1.94	1.84	2
C1111	EL5	2.54	2.33	2.92	2.59	3.09	2.68	2.6	2.5	3.01	2.72	2.78	3.27	2.93	3.07	3.38	2.2	3.22	2.46	2.69	3.11	3.34
C1111	EL51	2.82	2.6	3.23	2.87	3.42	2.99	2.86	2.78	3.43	2.85	1.99	3.54	3.25	3.32	3.6	2.94	3.82	3.69	2.71	3.39	3.32
C1111	EL52	2.57	2.33	2.95	2.6	3.12	2.7	2.63	2.51	2.97	2.9	2.09	3.04	2.96	3.24	3.28	1.66	2.93	1.81	2.88	2.99	3.14
C1111	EL53	2.31	2.14	2.66	2.36	2.81	2.44	2.38	2.27	2.74	2.62	4.14	3.64	2.67	3.02	3.27	2.78	3.24	2.57	2.37	3.12	3.67
C1111	EL54	1.38	1.64	1.58	1.42	1.73	1.48	1.41	1.34	1.61	1.58	2.8	2.6	1.59	2.86	2.21	2.84	3.16	3.33	3.03	3.04	3.27
C1111	EL6	3.42	3.17	3.93	3.49	4.16	3.61	3.51	3.36	4.05	3.87	3.7	3.59	3.9	3.58	3.96	3.42	3.78	3.01	3.28	2.98	2.78
C1111	EL61	3.66	3.4	4.2	3.73	4.45	3.86	3.76	3.59	4.33	4.14	4.06	3.96	4.22	3.95	4.53	3.7	4.22	3.15	3.49	3.07	2.81
C1111	EL62	2.39	2.17	2.74	2.45	2.92	2.51	2.43	2.34	2.81	2.71	3.2	3.2	2.76	3.02	2.89	3.1	2.85	2.83	2.69	2.67	2.71
C1111	EL63	2.71	2.48	3.15	2.78	3.31	2.88	2.8	2.67	3.21	3.07	2.45	3.14	3.13	2.38	2.9	2.59	2.79	2.93	3	3.01	3.13
C1111	EL64	2.66	2.45	3.05	2.71	3.22	2.82	2.74	2.6	3.15	3.01	2.23		3.07	3.06	2.58	2.49	3.24	3.05	3.18	3.03	2.96
C1111	EL65	2.52	2.32	2.89	2.59	3.07	2.68	2.59	2.47	2.99	2.85	3.19	2.24	2.6	3.32	3.17	2.89	2.17	2.19	2.4	2.38	2.32
C1111	ES	3.69	2.46	3.23	3.15	3.66	2.32	3.04	3.84	3.7	2.76	3.33	3.85	2.64	3.91	3.09	2.99	3.84	2.27	4.08	3.07	4.34	4.4
C1111	ES1	2.85	2.99	3.15	2.95	2.91	3.02	3.98				3.01	3.04	3.27	2.53	3.19	3.16	2.52	2.36	2.17	2.68	2.62
C1111	ES11	2.86	3.01	3.13	2.97	2.9	3.03	3.99				3.03	3.06	3.29	2.53	3.2	3.21	2.52	2.35	2.18	2.72	2.64
C1111	ES12	2	2				1										1.2	1.6	1.4		2	2
C1111	ES13	2.4	1.8	3.75	2.3	3.32	3.32	3.28				2.46	2.55	1.33	2.6		2.57	2.54	2.55	2.33	2.22	2.36
C1111	ES2	4.35	3.16	3.9	3.81	4.47	4.32	3.74				4.25	4.38	3.46	4.42	3.9	3.64	4.79	4.05	4.45	4.48	4.93
C1111	ES21	5.38	4.92	6.03	4.9	4.66	5.52	5.28				5.95	6.45	6.45	5.2	5.2	5.41	6.71	6.24	5.72	7.02	7.28
C1111	ES22	4.97	4.19	4.73	4.63	4.49	5.33	5.11				4.74	4.55	4.53	4.55	4.94	4.46	5.72	5.13	5.22	5.62	5.62
C1111	ES23	5.02	3.17	4.46	4.57	5.13	4.46	4.34				4.55	4.77	4.3	5.63	4.69	4.17	5.66	3.91	5.49	5.18	5.66
C1111	ES24	3.52	1.96	2.53	2.58	4.03	3.05	2.26				3.36	3.8	2.26	3.95	3.01	2.93	3.83	3.09	3.63	3.34	4.1
C1111	ES4	3.72	2.26	3.05	3.03	3.51	2.02	2.74				3.13	3.81	2.51	3.78	2.81	2.85	3.84	1.64	3.97	2.64	4.29
C1111	ES41	3.97	2.25	3.07	3.24	3.73	2.29	2.77				3.47	4.18	2.82	4.22	3.1	3.15	4.4	1.56	4.07	2.76	4.55
C1111	ES42	3.08	1.99	2.72	2.61	3.02	1.24	2.57				2.27	3.07	2.07	3.1	1.93	2.13	2.45	1.77	3.18	2.32	3.67
C1111	ES43	4.52	3.56	4.49	2.48	2.92	1.85	2.93				2.17	2.75	1.52	2.06	2.13	2.17	2.08	2.51	4.52	2.12	3.3
C1111	ES5	3.11	2.73	3.96	3.16	3.85	1.77	2.62				4.34	4.01	3.54	4.84	3.73	3.03	3.89	3.48	4.52	3.42	4.74
C1111	ES51	3.37	2.87	4.16	3.35	4.07	1.73	2.69				4.42	4.07	3.6	4.94	3.84	3.1	4.05	3.57	4.64	3.55	4.96
C1111	ES52	1.76	2.06	3.02	2.81	2.46	1.9	2.27				2.49	2.72	1.94	2.98		1.97		2.15	2.55	1.77	3.1
C1111	ES53		1.23		1.34	2.92	2.2	1.81				3.5	3.73	4.28	2.36	1.89	1.7	1.67	1.55	1.99	1.56	1.8
C1111	ES6	2.43	2.68	2.98	2.97	3.61	1.47	3.87				2.39	2.95	1.32	3.18	3.35	2.76	1.67	2.66	3.9	3.11	3.51
C1111	ES61	2.74	2.85	3.21	3.3	3.92	1.58	4				2.39	2.99	1.3	3.19	3.39	2.81	1.69	2.76	4.05	3.2	3.53
C1111	ES62		1.25			1.47		1.22				2.34	2.25	1.94	2.73	1.41	1.27		1.23		1.47	3.16
C1111	ES64
C1111	EU	6.67	6.37	6.66	6.12	6.46	5.95	5.72	5.05	6.09	5.75		5.68	5.5	5.92	6.26	6.39	5.67	6.25	5.8	6.33	5.81	6.17
C1111	EU28	5.33	5.16	5.32	4.9	6.03	5.5	4.67	5.05	6.08	5.75		5.68	5.5	5.91	6.26	6.39	5.67	6.25	5.8	6.33
C1111	FI	4.07	3.31	3.76	3.39	3.43	3.86	3.14	4.35	3.88	3.94	4.02	4.46	4.57	3.06	4.39	4.99	3.72	4.49	2.58	5.69	4.51	4.86
C1111	FI1	3.32	3.41	3.24	3.53	3.45	3.75	3.6	3.98	3.62	4.12	4	4.47	4.58	2.98	4.35	4.98	3.7	4.46	2.58	5.69	4.49
C1111	FI13	3.18	3.23	3.02	2.75	2.44	2.95	3.42	3.21	3.04	3.02	2.71	3.06	2.68	3.21	3.8
C1111	FI19		3.38	3.56	3.72	3.65	3.76	3.68	3.89	3.87	4.06	4.11	4.54	4.6	2.92	3.97	5.18	3.45	4.63	2.15	5.23	4
C1111	FI1A	5	3.63	3.69	3.4	3.45	3.47	3	3.26	2	3.18	3.32	3.46	3.38	2.37	5.8
C1111	FI1B	3.58	3.41	3.2	3.51	3.43	3.78	3.61	4.05	3.62	4.19	3.2	3.98	4.23	3.03	4.74	4.91	3.76	4.6	2.36	5.21	4.77
C1111	FI1C	3.58	3.41	3.2	3.51	3.43	3.78	3.61	4.05	3.62	4.19	4.18	4.56	4.79	3.11	4.44	4.99	3.78	4.44	2.65	5.95	4.61
C1111	FI1D											2.24	3.91	2.79	3.23	4.8	3.75	3.48	2.46	3.11	5.87	3.72
C1111	FR	7.18	6.7	7.54	6.35	7.7	7.1	6.86	6.36	7.2	7.57	7.16	6.73	7.23	7.32	7.4	7.85	5.31	7.28	6.9	7.82	6.77	7.05
C1111	FR2	7.61	7.1	7.9	6.58	8.15	7.36	7.14	6.8	7.62	8	7.52	7.15	7.56	7.77		8.38	5.05
C1111	FR4	6.87	6.25	6.93	5.37	7.8	6.9	6.72	6.09	6.72	7.27	6.89	6.51	5.97	6.84		7.47	4.56
C1111	FR5	6.52	6.08	7.28	6.32	6.95	6.78	6.54	5.7	6.73	7.11	6.52	6	7.08	6.85		7.37	6
C1111	FR6	5.43	4.97	5.88	4.76	5.73	5.75	5.53	4.59	5.45	4.85	5.85	4.75	6.16	5.38		5.53	5.38
C1111	FR7	6.58	5.69	6.39	4.31	6.37	5.74	5.84	5.43	5.59	6.06	6.27	5.49	6.26	6.17		6.01	5.69
C1111	FR8	4.06	3.68	4.18	3.18	3.65	3.41	3.21	4.02	4.28	3.94	4.14	3.76	4.35	4.7		4.12	4.42
C1111	FR9
C1111	FR91
C1111	FRA
C1111	FRA2
C1111	FRA3
C1111	FRA4
C1111	FRB													7.27	7.02	7.37	7.55	4.4	7.09	6.78	7.5	5.87
C1111	FRC													6.46	6.38	6.2	7.04	4.06	6.75	6.46	6.89	5.88
C1111	FRC1	7.27	6.22	6.95	4.94	7.45	6.57	6.34	5.91	6.36	7.04	6.47	6.14	6.53	6.42	6.11	7.08	4.04	6.71	6.53	6.81	5.65
C1111	FRC2	6.9	5.87	7.16	5.41	7.8	6.59	6.61	5.88	6.16	6.95	6.78	6.55	6.12	6.18	6.63	6.87	4.15	6.95	6.1	7.26	6.98
C1111	FRD													8	8.18	7.97	8.78	6.22	8.33	7.62	8.86	7.55
C1111	FRD1	6.79	6.73	7.67	7.31	8.01	7.24	7.15	6.04	7.72	7.64	7.51	7.34	7.24	7.58	7.45	8.09	5.84	7.69	6.78	8.36	7.04
C1111	FRD2	7.88	7.33	8.44	7.87	8.81	7.89	7.77	7.39	9.07	8.99	8.63	8.38	8.6	8.63	8.37	9.32	6.54	8.83	8.28	9.24	7.91
C1111	FRE													8.06	8.96	8.85	9.6	5.74	8.62	8.36	9.34	8.71
C1111	FRE1	7.96	8.07	8.45	8.72	9.2	8.3	8.02	7.18	8.89	9.19	8.7	9.05	7.81	8.92	8.7	9.82	6.33	9.01	8.76	9.65	9.03
C1111	FRE2	8.17	8.21	8.55	7.82	9.05	8.01	7.98	7.51	8.87	9.07	8.31	7.82	8.2	8.99	8.94	9.48	5.42	8.42	8.15	9.17	8.53
C1111	FRF													6.88	7.53	7.82	8.35	4.91	6.96	7.26	7.66	7.78
C1111	FRF1	7.37	6.85	7.33	5.66	8.07	7.16	7.02	6.45	7.11	7.51	7.12	7.14	6.85	7.19	7.62	8.26	5.03	7.67	7.22	7.69	7.85
C1111	FRF2	8.11	7.73	8.05	6.71	8.72	7.79	7.51	7.4	7.26	8.27	7.86	7.69	7.38	7.94	8.43	8.86	5.1	7.52	7.66	8.16	8.26
C1111	FRF3	6.78	6.25	6.81	5.31	7.75	6.94	6.7	6.09	6.81	7.31	6.88	6.37	5.68	6.94	6.7	7.52	4.59	5.96	6.59	6.86	6.98
C1111	FRG													7.32	6.7	7.19	7.53	5.76	7.16	6.14	7.71	5.5
C1111	FRH													6.8	7.43	7.45	7.73	6.83	7.8	6.74	7.89	6.7
C1111	FRI													6.86	6.3	6.32	6.65	5.46	6.26	6	7.34	5.15
C1111	FRI1	5.28	4.93	6.12	5.29	5.99	6.13	5.81	4.81	5.21	5.02	6.26	5.02	6.44	5.71	5.11	5.75	5.38	6.09	5.3	7.15	4.71
C1111	FRI2	4.93	4.53	5.54	4.24	5.6	5.44	5.39	4.2	5.12	5.87	4.94	5.35	5.34	5.02	5.81	5.93	3.9	5.28	4.7	5.68	4.24
C1111	FRI3	6.69	5.96	7.21	6.03	6.51	6.53	6.11	5.82	6.44	6.61	6.02	4.97	7.06	6.55	6.66	6.94	5.61	6.38	6.29	7.5	5.34
C1111	FRJ													6.07	5.28	5.2	5.36	5.54	5.53	4.52	6.05	4.31
C1111	FRJ1	4.23	3.79	4.04	3.45	3.78	3.49	3.29	4.21	4.5	4.07	4.55	3.93	4.74	5.19	4.67	4.44	4.57	4.92	3.97	4.53	4.23
C1111	FRJ2	5.54	5.03	5.81	4.61	5.64	5.61	5.42	4.52	5.6	4.65	5.77	4.59	6.12	5.29	5.23	5.41	5.58	5.55	4.54	6.14	4.31
C1111	FRK													6.26	6.17	6.09	6.01	5.69	6.14	5.86	5.78	5.5
C1111	FRK1	6.75	5.81	6.2	4.14	6.44	5.77	5.78	5.26	5.47	6.45	6.35	5.36	6.3	6.46	6.28	5.92	5.52	5.79	5.75	5.08	5.3
C1111	FRK2	6.39	5.56	6.59	4.51	6.3	5.71	5.89	5.58	5.7	5.66	6.19	5.62	6.22	5.89	5.89	6.1	5.86	6.53	5.97	6.49	5.73
C1111	FRL													3.93	4.02	3.71	3.71	4.15	3.45	3.24	3.39	3.42
C1111	FRM													3.14	3.5	3.46	3.27	2.88	3.57	3.67	3.91	3.22
C1111	FRY
C1111	FRY1
C1111	FRY2
C1111	FRY3
C1111	FRY4
C1111	FRY5
C1111	HR	4.8	4.46	4.65	3.26	4.99	4.16	4.64	4.69	5.57	5.26	4.09	5.3	5.46	4.95	4.18	5.4	5.66	5.89	5.45	5.61	5.89	6.71
C1111	HR01											3.82	4.44
C1111	HR02											4.15	5.47	5.48	4.96	4.22	5.46	5.69	5.92	5.46	5.63	6.01
C1111	HR03											3.56	3.68	3.68	3.28	2.72	3.8	3.58	3.95	3.62	4.2	3.42
C1111	HR05														4.96	4.22	5.46	5.69	5.92	5.46	5.63	4.85
C1111	HR06														4.96	4.22	5.46	5.69	5.92	5.46	5.63	5.46
C1111	HU	3.59	4.29	3.5	2.63	5.1	4.48	4.05	3.58	4.96	3.84	3.69	4.18	3.74	4.63	4.74	5.2	5.39	5.49	5.16	5.34	5.51	6
C1111	HU1	3.1	3.8	2.76	1.76	4.52	4.37	4.02	2.77	4.74	3.1	3.19	4.14	2.84	4.24	4.6	4.88	4.72	5.03	4.78	4.84	4.64
C1111	HU11	3.1	3.8	2.76	1.76	4.52	4.37	4.02	2.77	4.74	3.1	3.19	4.14	2.84	4.03	4.14	4.57	4.42	5.44	4.87	5.23	4.04
C1111	HU12	3.1	3.8	2.76	1.76	4.52	4.37	4.02	2.77	4.74	3.1	3.19	4.14	2.84	4.27	4.66	4.93	4.76	4.98	4.77	4.79	4.64
C1111	HU2	4.05	4.47	4.2	3.03	4.93	4.69	4.54	3.89	5.21	4.38	4.12	4.51	4.14	4.99	5.37	5.53	5.98	5.57	5.49	5.8	5.93
C1111	HU21	4.1	4.4	3.96	2.55	4.82	4.76	4.58	3.6	5.09	4.01	3.97	4.38	3.53	4.69	5.08	5.48	5.8	5.14	5.43	5.48	5.43
C1111	HU22	3.64	3.9	3.73	2.98	4.73	4.28	4.15	4.13	4.78	4.28	4.22	4.53	4	4.69	5.21	5.26	5.67	5.19	5.12	5.75	5.9
C1111	HU23	4.36	5.01	4.84	3.49	5.19	4.99	4.86	3.92	5.63	4.78	4.16	4.61	4.81	5.48	5.74	5.82	6.37	6.2	5.82	6.07	6.32
C1111	HU3	3.33	4.24	3.11	2.44	5.26	4.34	3.72	3.44	4.82	3.55	3.43	3.93	3.55	4.43	4.31	5	5.01	5.47	4.95	5.05	5.27
C1111	HU31	2.88	4.01	2.53	2.14	4.74	4.45	3.72	3.12	4.66	3.54	3.48	3.88	3.11	4.27	4.48	4.85	5.1	5.42	4.93	5.44	5.19
C1111	HU32	3.27	4.29	2.96	2.38	5.16	4.26	3.37	3.24	4.82	3.32	3.16	3.73	3.52	4.31	4.42	4.92	4.87	5.5	4.84	5.12	5.27
C1111	HU33	3.62	4.31	3.53	2.64	5.6	4.36	4.01	3.77	4.9	3.77	3.65	4.15	3.83	4.62	4.11	5.17	5.08	5.48	5.06	4.76	5.32
C1111	IE	9.26	9.23	8.23	8.38	9.78	8.39	9.38	7.89	8.68	8.05	8.54	9.58	6.86	8.98	9.64	10.36	9.19	9.67	8.53	9.48	8.04	10.28
C1111	IE01											8.46	9.28	6.62	8.98	9.56	10.36	9.32
C1111	IE02											8.56	9.65	6.91	8.98	9.66	10.36	9.16
C1111	IE04														11.8	8.97	9.29	7.97	9.4	9.35	9.17	7.67
C1111	IE05														7.26	9.98	10.34	9.35	9.75	8.78	9.74	9.18
C1111	IE06														10.04	9.5	10.39	9.14	9.64	8.4	9.38	7.53
C1111	IS												1.2	4.5				3	4	2.67	2.5	2.58	2.85
C1111	IT	4.73	4.46	4.81	4.35	5.32	5.45	5.48	4.91	5.33	5.05	5.16	5.33	5.89	5.44	5.4	5.52	5.77	5.61	5.24	5.26	5.44	6.27
C1111	ITC	5.08	4.98	5	4.57	5.24	5.42	5.62	5.12			5.5	4.9	5.84	5.45	5.8	5.26	6.21	5.58	4.93	5.75	5.54
C1111	ITC1	4.96	4.87	4.56	4.27	4.79	5.03	5.27	5.06			5.27	4.82	5.69	5.96	5.77	5.06	6.2	4.92	4.44	5.83	5.26
C1111	ITC2											2	2	2	2		1	1	2	2	2	2
C1111	ITC3	3.3	3.21	3.3	2.97	2.97	2.97	3.63	2.97			2.61	2.37	2.21	2.56		2.39	2.65	2.56	2.81	2.71	2.81
C1111	ITC4	5.41	5.26	5.64	5.04	5.9	6.01	6.16	5.2			5.85	5.07	6.1	4.74	5.84	5.54	6.24	6.56	5.57	5.66	5.88
C1111	ITD	5.53	5.04	5.58	5.13	6.19	6.41	6.39	5.22			5.73	6.07	6.88	6.17	6
C1111	ITE	4.2	3.83	3.96	3.42	4.77	4.61	4.58	4.81			5.31	5.28	5.34	5.04	5.09
C1111	ITF	2.92	3.01	3.04	3.01	3.24	3.32	3.36	2.94			3.35	3.4	6.81	3.31	3.18	3.3	3.53	3.33	3.26	3.35	3.47
C1111	ITF1	3.86	4.28	3.93	4.15	4.62	4.32	4.42	3.44			4.47	4.29	4.11	4.47	4.49	4.37	4.47	4.46	3.9	4.13	4.12
C1111	ITF2	2.82	2.92	3.46	3.29	3.52	3.42	3.4	3.41			2.76	3.14					3.07	3.82	3.82	3.82	3.77
C1111	ITF3	2.93	2.78	3.21	2.9	3.22	3.33	3.46	3.26			3.09	3.22	3.83	3.59	3.13	3.92	3.67	3.31	3.57	3.35	3.85
C1111	ITF4	1.92	1.15	1.52	1.26	1.74	1.52	2.5	2.36			2.22	2.72	2.27	2.49	2.28	2.27	2.94	2.26	2.38	2.71	2.68
C1111	ITF5	1.98	1.98				3.13	2.8	2.54			2.07	2.65		2.66	2.62	2.68	2.74	2.72	2.67	2.75	2.74
C1111	ITF6	2.21	2.31	2.24	2.33	2.39	2.21	2.36	2.25			2.69	2.56	2.58	2.73	2.93	2.9	2.91	2.75	2.87	2.87	2.96
C1111	ITG	2.47					2.31	2.52				2.88	2.46	2.54			2.61	2.38	2.42	2.51	2.55	2.34
C1111	ITG1	2.47					2.31	2.52				2.88	2.46	2.53	1.82		2.42	2.42	2.47	2.47	2.54	2.59
C1111	ITG2																4.5	2.88	2	2.67	2.55	2.21
C1111	ITH																6.37	6.64	7.09	6.32	5.87	6.39
C1111	ITH1			2	2							4.33		4	4		4	4	4	4	4	3.5
C1111	ITH2																2.5	2.5	5	3.67	4	4.33
C1111	ITH3	5.95	5.32	5.29	5.03	6.09	6.5	6.8	6.14			5.96	5.9	7.14	6.77	6.55	6.64	6.46	7.36	6.45	5.65	6.59
C1111	ITH4	5.03	5.01	5.04	4.13	4.83	4.89	4.28	4.82				4.44	6.26	5.69	5.99	5.68	5.08	4.93	4.66	4.33	4.25
C1111	ITH5	5.47	4.99	5.68	5.19	6.27	6.43	6.31	4.87			5.89	6.29	6.78	5.84	5.69	6.26	6.91	7.14	6.38	6.15	6.41
C1111	ITI																5.69	4.46	3.97	4.43	4.47	4.37
C1111	ITI1	4.05	3.73	3.76	2.7	4	3.44	3.18	3.57			3.46	3.34	3.37	3.33	3.48	3.65	3.51	2.89	3.53	3.51	3.86
C1111	ITI2	4.65	4.33	4.28	3.87	5.7	5.73	5.76	6.04			6.53	6.5	6.82	6.49	6.4	6.82	5.14	4.61	5.36	5.53	4.92
C1111	ITI3	4.11	3.77	4.16	3.98	4.11	4.17	4.23	3.83			4.43	3.96	4.84	3.94	4.39	5.01	5	4.89	4.84	4.87	4.86
C1111	ITI4	3.45	2.81	3.06	1.92	3.54	3.34	3.34	3.56			2.93	3.45	3.07	2.86	3.23	4.09	4.27	4.06	4.18	3.96	3.86
C1111	LT	3.56	3.17	3.84	3.61	4.12	3.85	2.46	4.16	4.76	4.4	3.4	3.32	5.17	4.56	4.81	5.73	4.75	5.23	4.3	4.53	5.65	4.8
C1111	LV	2.86	2.79	3.54	2.85	3.1	3.77	3.03	3.78	4.35	3.86		3.13	4.75	4.23	3.41	5.54	4.84	5.3	4.2	5.2	5.69	4.93
C1111	ME								2.45	3.58	3.66	3.43	3.26	2.81	3.33	3.05	2.92	3.26	3.26	3.26	2.85	3.09
C1111	MK	2.48	2.11	2.67	2.2	3.56	3.08	3.01	2.4	3.41	3.08	3.04	3.35	2.7	3.2	3.76	2.75	3.84	2.75	3.4	3.53	3.53	3.5
C1111	MT
C1111	NL	8.37	8.1	7.94	8.88	9.07	8.74	8.56	7.24	8.76	9.37	8.91	7.89	8.62	8.84	9.37	9.15	7.95	9.07	8.9	9.57	8.97	8.19
C1111	NL1	7.81	8.04	7.13	8.1	8.1	8.39	7.68	6.95	8.23	8.83	8.84	7.59	8.54	8.46	9.33	8.81	8.04	8.96	8.78	9.03	8.74
C1111	NL11	7.93	8.18	7.32	8.26	8.33	8.39	7.91	7.11	8.59	9.13	8.79	7.89	8.62	8.44	9.31	8.87	8	8.93	8.77	9.01	8.82
C1111	NL12	8.52	8.32	7.24	8.16	8.26	8.39	8.11	6.91	7.9	8.78	9.54	7.16	8.18	8.03	9.83	8.69	8.24	9.44	9.26	9.64	8.95
C1111	NL13	6.59	6.97	6.01	7.05	6.63	8.39	6.11	6.2	6.66	7.12	7.47	5.32	8.35	9.79	7.86	8.47	8.11	8.31	7.95	7.81	7.3
C1111	NL2	8.28	7.63	6.57	8.6	8.33	8.39	8.28	7.27	8.57	8.99	8.99	7.92	8.97	9.3	9.05	8.95	8.09	9.31	9.08	9.55	9.05
C1111	NL21	6.66	6.11	5.76	7.09	6.59	8.4	6.54	5.82	7.14	6.99	6.69	5.8	7.86	6.85	6.88	8.05	6.98	6	7.16	7.29	6.26
C1111	NL22	7.9	6.89	6.57	7.86	13.73	8.39	7.99	6.52	8.35	8.44	8.27	7.1	7.86	8.39	7.87	8.07	7.1	8.49	8.26	8.81	8.41
C1111	NL23	8.75	8.29	6.7	9.34	5.13	8.39	8.77	7.96	8.89	9.71	9.62	8.36	9.61	9.93	9.76	9.35	8.51	9.8	9.52	10.02	9.56
C1111	NL3	8.58	7.8	8.2	8.91	9.37	8.39	8.62	7.1	8.75	9.39	8.96	8.03	8.42	8.95	9.35	9.43	8.02	9.14	8.98	9.98	9.12
C1111	NL31	7.5	6.1	6.64	9.27	8.55	8.3	7.62	5.22	8.78	8.13	8.69		4.91	3.92		7.26	8.08	9.42	8.75	8.87	8.88
C1111	NL32	7.92	7.74	7.69	8.38	8.71	8.39	8.26	6.58	8.48	8.79	8.74	7.5	8.96	8.81	8.73	9.36	7.99	9.51	8.84	9.45	8.45
C1111	NL33	8.44	7.75	8.21	8.75	9.21	8.4	8.45	6.74	9.08	9.33	9.22	8.79	8.56	9.41	9.83	9.76	8.07	9.61	8.99	10.12	9.34
C1111	NL34	8.83	7.87	8.39	9.18	9.69	8.39	8.85	7.48	8.67	9.63	8.91	7.82	8.33	8.64	9.22	9.33	8	8.85	9	10.07	9.18
C1111	NL4	7.77	7.29	7.91	8.16	8.4	8.39	8.11	6.81	8.51	8.85	8.51	7.57	8.5	8.81	9.31	9.32	7.44	8.81	8.68	9.67	8.88
C1111	NL41	7.99	7.04	7.87	8.37	8.63	8.39	8.25	6.54	8.69	9	8.72	7.84	8.46	8.81	9.64	9.39	8.05	9.15	8.89	9.84	8.88
C1111	NL42	7.47	7.74	7.99	7.77	8.01	8.39	7.89	7.26	8.18	8.69	8.13	8.22	8.56	8.81	8.85	9.19	6.46	8.26	8.35	9.37	8.88
C1111	NO	4.61	4.07	4.1	4.61	4.77	4.91	4.17	4.4	12.53		4.54	3.81	4.06	3.83	4.86	5.7	4.58	5.23	2.32	5.54	4.79
C1111	PL	3.5	3.68	3.95	3.46	4.41	4.08	3.37	4.04	4.23	4.27	4.45	4.21	4.26	4.51	5.06	4.67	4.67	5.01	4.22	4.56	5.32	5.08
C1111	PL1	2.62	3	3.16	2.99	3.59	3.31	2.72	3.4	3.44	3.57	3.56	3.48	3.4	3.6	4.17	3.51	3.61
C1111	PL2	3.04	3.01	3.3	3.13	3.66	3.5	2.64	3.48	3.68	3.43	3.3	3.74	3.72	3.62	4.35	3.93	4.3	4.47	4.06	4.1	4.62
C1111	PL21	2.9	2.77	3.11	2.89	3.36	3.4	2.47	3.29	3.44	3.23	3.14	3.46	3.55	3.31	3.91	3.59	3.91	4.12	3.84	3.9	4.25
C1111	PL22	3.29	3.46	3.66	3.58	4.21	3.65	2.93	3.82	4.08	3.76	3.51	4.14	3.97	4.05	4.92	4.42	4.84	4.92	4.35	4.4	5.17
C1111	PL3	2.75	2.88	3.28	2.99	3.37	3.19	2.55	3.25	3.6	3.35	3.5	3.38	3.43	3.42	4.2	4.06	4.37
C1111	PL4	3.3	3.92	4.03	3.04	4.66	4.18	3.35	4	3.81	4.73	4.82	3.97	4.24	5.02	5.57	5.13	4.78	5.18	3.88	4.38	5.31
C1111	PL41	3.46	4.14	4.13	3.21	4.79	4.33	3.42	4.29	3.85	4.64	4.5	4.04	3.99	4.8	5.28	4.8	4.79	5.12	4	4.23	5.47
C1111	PL42	3.29	3.8	4.08	3.01	4.67	4.2	3.55	3.9	3.97	4.95	5.35	4.12	4.49	5.26	6.05	5.81	4.84	5.34	3.96	4.84	5.26
C1111	PL43	2.72	3.53	3.41	2.29	4.19	3.67	2.48	3.4	3.24	4.4	4.47	3.36	4.25	5.21	5.51	4.43	4.57	4.93	3.15	3.66	4.7
C1111	PL5	4.07	4.17	4.47	3.83	5.07	4.82	3.74	4.6	4.98	4.71	5.17	5.1	4.96	5.05	5.83	5.43	5.55	5.71	4.89	5.19	5.78
C1111	PL51	3.89	3.95	4.28	3.66	4.81	4.59	3.51	4.29	4.5	4.45	5.04	4.72	4.41	4.77	5.42	5.21	5.32	5.37	4.52	4.71	5.56
C1111	PL52	4.41	4.58	4.83	4.16	5.53	5.2	4.16	5.16	5.76	5.18	5.38	5.71	5.87	5.55	6.57	5.85	5.94	6.26	5.54	6.04	6.14
C1111	PL6	3.37	3.63	4.1	3.78	4.47	4.05	3.81	4.27	4.29	4.43	4.6	4.35	4.36	4.82	5.33	5	4.55	5.18	4.27	4.96	5.86
C1111	PL61	3.11	3.78	4.14	3.42	4.49	3.92	3.66	4.25	4.11	4.41	4.39	4.27	4.05	4.78	5.27	4.57	4.47	5.11	3.96	4.57	5.7
C1111	PL62	3.36	3.43	3.83	4.01	4.28	3.83	3.6	4.03	4.27	4.14	4.81	4.13	4.32	4.47	4.87	4.99	4.23	4.77	4.06	4.9	5.6
C1111	PL63	3.73	3.62	4.31	4.01	4.66	4.45	4.2	4.54	4.57	4.78	4.67	4.72	4.73	5.2	5.89	5.6	5.02	5.62	4.88	5.56	6.32
C1111	PL7															4.14	3.66	3.52	4.09	3.53	3.54	4.53
C1111	PL71	2.54	2.92	3.08	2.69	3.61	3.28	2.75	3.6	3.37	3.74	3.78	3.8	3.3	3.59	4.47	3.77	3.67	4.46	3.62	3.66	5.24
C1111	PL72	2.57	2.69	3.09	2.77	3.15	2.97	2.16	3.17	3.53	3.24	2.75	3.08	3.08	3.07	3.72	3.49	3.35	3.64	3.41	3.38	3.72
C1111	PL8															4.3	4.16	4.55	4.85	4.41	4.51	5.21
C1111	PL81	2.99	2.99	3.45	3.13	3.49	3.35	2.6	3.31	3.76	3.46	3.66	3.56	3.54	3.6	4.59	4.47	5.05	5.33	4.79	4.93	5.72
C1111	PL82	2.79	2.79	3.2	2.95	3.39	3.04	2.71	3.26	3.45	3.27	3.71	3.23	3.46	3.29	3.71	3.55	3.47	3.81	3.71	3.68	3.92
C1111	PL84	1.83	2.83	2.84	2.68	3.04	3	2.43	2.92	3.06	3.05	3.28	2.99	3.2	3.24	3.65	3.33	3.25	3.66	2.96	3.28	4.44
C1111	PL9															3.97	3.33	3.57	3.87	3.36	3.64	4.4
C1111	PL91	2.68	3.06	3.22	3.2	3.57	3.33	2.69	3.27	3.49	3.45	3.4	3.16	3.46	3.6	4.69	3.93	4.23	3.87	3.15	2.91
C1111	PL92	2.68	3.06	3.22	3.2	3.57	3.33	2.69	3.27	3.49	3.45	3.4	3.16	3.46	3.6	3.89	3.27	3.5	3.87	3.38	3.72
C1111	PT	2.16	2.47	2.1	2.46	2.81	1.85	2.47	1.93	2.38	3.1	3.11	3.87	3.87	4.18	2.13	4.41	2.39	4.56	2.56	2.67	2.75	2.74
C1111	PT1	2.16		2.1				2.47	1.93	2.38						2.13		2.39		2.56	2.67	2.75
C1111	PT11	1.31	0.84	1.64	1.3	1.46	1.07	1.44	1.39	1.18	0.96	0.9	0.95	0.86	1.53	1.2	1.04	1.04	1.17	1.71	1.93	1.71
C1111	PT15
C1111	PT16	1.76	1.16	1.89	1.3	1.41	1.17	1.87	1.77	2.44	1.79	1.46	1.33	1	1.59	1.77	1.79	1.95	1.72	1.99	2.51	2.39
C1111	PT17	2.58	1.78	2.51	2.3	2.5	1.72	3.12	4.13	3.53	2.69	1.39	1.5	1.19	2.19	2.42	2.3	3.11	2.87	3.5	4.66	4.47
C1111	PT18	2.42		2.4				2.57	1.99	2.48						2.3	2.28	2.66	2.32	2.81	2.83	2.96
C1111	RO	2.29	3.04	1.92	2.34	3.4	2.97	2.75		3.41	2.43	2.69	3.67	2.65	3.47	3.59	3.78	3.95	4.89	4.8	4.76	2.96	5.3
C1111	RS								3.74	4.3	4.08	3.37	4.21	3.98	4.26	3.95	4.12	4.85	4.09	4.54	4.39	4.96	5.76
C1111	RS1																		4.63	5.22	4.94	5.18
C1111	RS11																		3.59	3.7	3.91	4.86
C1111	RS12																		4.73	5.36	5.04	5.21
C1111	RS2																		3.4	3.65	3.63	4.62
C1111	RS21																		3.65	3.97	3.96	4.8
C1111	RS22																		3.18	3.38	3.32	4.43
C1111	SE	6.03	5.97	6.39	5.57	6.18	6.63	5.66	6.46	6.44	6.31	5.66	5.62	6.82	6.31	7.25	7.57	6.68	7.36	4.79	7.73	7.45	6.59
C1111	SE1	5.35	4.94	5.57	4.72	5.82		5.34	6	5.89	5.41	4.71	4.73	6.33	5	6.87	7.23	6.34	6.78	4.65	7.3	7.36
C1111	SE11	5.42	4.55	5.26	4.45	5.63		5.02	5.49	5.1	4.64	3.91	3.87	6.1	3.47	6.35	6.36	5.73	5.93	3.89	6.41	7.01
C1111	SE12	5.35	4.98	5.6	4.75	5.85		5.37	6.05	5.97	5.49	4.78	4.81	6.35	5.14	6.92	7.32	6.4	6.87	4.72	7.38	7.4
C1111	SE2	6.43	6.48	6.65	6.2	6.11		5.6	6.56	6.4	6.69	5.92	6.3	7.3	7.01	7.6	7.9	6.95	7.89	4.98	8.13	7.59
C1111	SE21	5.34	4.69	5.78	4.96	5.57		4.34	5.34	5.61	5.68	4.6	4.45	6.9	6.34	6.57	7.41	6.56	6.55	4.14	6.38	6.69
C1111	SE22	7.4	7.39	7.34	7.34	6.7		5.7	7.39	7.41	8.03	6.44	7.42	7.83	7.56	8.39	8.42	7.67	8.48	5	8.76	8.28
C1111	SE23	5.51	5.8	5.94	4.98	5.47		5.82	5.74	5.27	5.27	5.59	5.27	6	5.92	6.9	7.37	6.1	7.57	5.26	7.93	7.06
C1111	SE3	3.88	3.07	4.65	4.47	4.62		4.28	4.7	4.26	3.14	4.05	4.26	4.83	3.59	5.91	6.07	5.35	5.96	2.86	6.36	5.93
C1111	SE31	3.88	3.07	4.65	4.47	4.62		4.28	4.7	4.26	3.14	4.03	4.25	4.97	3.62	5.95	6.09	5.43	5.98	2.87	6.42	5.96
C1111	SE32												4				3.64	3.29	3.83
C1111	SE33												2.5
C1111	SI	4.25	4.6	4.89	3.48	4.53	4.72	4.19	4.16	4.57	3.97	4.82	5.2	5.46	4.38	5.27	5.11	5.19	5.03	4.38	5.23	5.8	5.77
C1111	SI03								4.2	4.59	3.94	4.86	5.14	5.51	4.37	5.29	5.12	5.21	5.07	4.37	5.28	5.88
C1111	SI04								3.69	3.86	4.23	4.44	5.62	4.65	4.17	4.59	5.04	4.94	4.58	4.5	4.59	4.73
C1111	SK	3.16	4.04	3.86	3.08	4.83	4.35	3.86	3.87	4.9	4.05	3.5	4.54	3.33	4.62	5.51	5.6	5.93	4.86	4.84	4.87	5.62	5.78
C1111	SK01	3.16	4.21	3.55	3.06	4.82	4.09	3.67	3.58	5	3.9	3.64	4.83	2.88	4.65	5.12	5.23	5.72	3.73	4.35	4.66	5.29
C1111	SK02	3.57	4.52	4.22	3.42	5.24	4.74	4.31	4.22	5.4	4.32	3.99	5.14	3.37	5.21	5.97	6.11	6.43	5.03	5.25	5.21	6.15
C1111	SK03	2.54	3.39	3.11	2.42	4	3.61	3.15	3.07	4.19	3.58	2.78	3.61	3.03	3.61	4.89	4.64	4.91	4.44	4.09	4.46	4.63
C1111	SK04	2.18	3.12	3.44	2.3	4.07	3.63	2.96	3.33	3.93		2.72	3.58	3.49	3.78	4.87	4.92	5.18	4.91	4.39	4.36	4.97
C1111	TR	2.23	2.03	2.1	2.09	10	10.75	5.71	2.15	2.22		2	2.66	2.65	2.77	2.37	2.81	2.74	2.84	2.78	2.86	3.03
C1111	TR1												3.83	4.31		4.15	4.24	4.49	4.93	4.62	4.92	4.5
C1111	TR2												3.12	3.97		3.81	4.53	3.77	3.83	3.5	4	3.77
C1111	TR21												3.29	4.55		4.21	4.99	4.1	4.14	3.66	4.31	3.96
C1111	TR22												2.79	2.83		2.93	3.48	3.03	3.14	3.13	3.22	3.31
C1111	TR3												2.36	2.66		2.5	2.95	2.54	2.73	2.69	2.74	2.9
C1111	TR31												3.03	3.79		3.3	3.88	3.61	3.38	3.59	3.39	3.55
C1111	TR32												2.96	3.36		3.06	3.6	3.18	3.4	3.2	3.42	3.71
C1111	TR33												2.09	2.34		2.24	2.64	2.23	2.46	2.46	2.49	2.62
C1111	TR4												2.57	2.62		2.4	2.85	3.57	5.26	2.82	2.77	2.95
C1111	TR41												2.65	2.7		2.33	2.76	3.96	6.28	2.96	2.89	3.01
C1111	TR42												2.34	2.42		2.64	3.15	2.58	2.68	2.38	2.4	2.78
C1111	TR5												2.97	2.5		2.2	2.61	2.4	2.52	2.74	2.9	3
C1111	TR51												2.56	2.45		1.79	2.12	2.51	2.39	2.42	2.63	2.81
C1111	TR52												3.27	2.54		2.52	2.99	2.31	2.6	3.02	3.13	3.14
C1111	TR6												3.06	3.3		2.64	3.12	3.01	3.19	3.37	3.36	3.56
C1111	TR61												2.44	2.44		2.22	2.61	2.23	2.36	2.48	2.56	2.7
C1111	TR62												3.02	3.5		2.61	3.1	3.14	3.41	3.58	3.46	3.67
C1111	TR63												3.39	3.53		2.92	3.44	3.3	3.4	3.64	3.76	3.97
C1111	TR7												2.5	2.21		1.88	2.23	2.36	2.25	2.48	2.4	2.57
C1111	TR71												2.56	2.31		1.86	2.21	2.44	2.44	2.72	2.69	2.74
C1111	TR72												2.46	2.15		1.9	2.25	2.31	2.12	2.32	2.21	2.45
C1111	TR8												2.72	2.38		2.05	2.44	2.78	2.52	2.46	2.67	2.58
C1111	TR81												1.68	1.83		1.74	2.05	1.51	1.51	1.57	1.56	1.91
C1111	TR82												2.03	1.96		2.11	2.5	2.27	2.24	2.26	2.41	2.34
C1111	TR83												2.97	2.54		2.06	2.45	3.02	2.67	2.57	2.81	2.69
C1111	TR9												1.22	1.73		1.19	1.42	1.85	1.98	1.95	1.88	2.11
C1111	TRA												1.65	1.76		1.61	1.91	1.77	1.55	1.82	1.66	2.09
C1111	TRA1												1.72	1.87		1.7	2.01	1.93	1.66	2.04	1.96	2.09
C1111	TRA2												1.58	1.66		1.53	1.82	1.6	1.43	1.57	1.35	2.09
C1111	TRB												1.61	1.53		1.51	1.8	1.93	1.95	2.11	1.99	2.14
C1111	TRB1												1.94	1.8		1.51	1.8	2.61	2.02	1.87	2.47	2.46
C1111	TRB2												1.45	1.39		1.51	1.8	1.63	1.93	2.21	1.77	1.97
C1111	TRC												2.96	3.13		2.79	3.32	3.11	3.25	3.14	3.24	3.82
C1111	TRC1												3.22	3.03		2.29	2.7	2.65	3.45	3.38	3.44	3.7
C1111	TRC2												3.07	3.3		2.86	3.41	3.24	3.08	3.14	3.29	3.84
C1111	TRC3												2.6	2.93		3.01	3.57	3.15	3.5	2.99	3.03	3.83
C1111	UK	7.96	7.04	7.95	7.75	7.73	7.91	7.98	7.18	8.28	7.93	7.63	7.7	6.62	7.34	8.53	8.92	7.8	8.18	7.67	8.83	7.08
C1111	UKC											7.94	7.97	6.33	6.47	8.13	9.01	7.67	8.14	7.76	9
C1111	UKD											6.02	6.53	4.94	5.25	5.51	7.19	6.37	5.72	4.89	6.28
C1111	UKE											7.72	8.1	6.87	7.31	8.37	9.28	7.77	8.55	7.77	8.89
C1111	UKF											7.81	7.95	6.35	7.66	8.47	9.26	7.8	8.26	7.95	8.81
C1111	UKG											7.25	7.43	6.26	6.64	8.19	8.4	7.55	7.78	7.04	8.58
C1111	UKH											7.6	7.16	7.22	7.84	9.06	8.97	8.09	8.45	7.97	9.23
C1111	UKI											8.45	7.96	7.96	6.96
C1111	UKJ											7.82	8	7.02	7.22	8.74	9.03	7.71	8.33	7.97	9.17
C1111	UKK											7.24	7.98	5.53	6.73	8.01	8.04	7.44	7.79	7.65	8.29
C1111	UKL											7.12	7.38	5.66	6.56	7.76	7.1	7.39	7.44	6.77	8.03
C1111	UKM											8.22	8.07	6.62	7.46	9.02	8.37	8.32	8.06	6.74	8.62
C1111	XK								3.39	4.07	3.48	3.76	3.76	3.35	3.85	3.6	3.39	4.1	3.98	3.46	3.55	4.25
C1112	AL	3.04	2.82	3.16	2.83	3.08	3.12	2.96	3.51	3.97	3.98	3.94	4.18	4.05		4	3.95	3.9	4.04	3.69	4.07	4.33
C1112	AT	4.54	4.44	4.3	4.2	4.73	4.52	4.18	3.7	4.31	4.06	4.08	4.65	4.15	3.97	4.96	4.68	4.6	4.05	3.63	4.26	4.24	4.39
C1112	BA	3.28	2.38	3.04	2.27	3.71	3.09	3.2	3.37	3.84	2.73	2.65	3.58	3.74	3.95	2.53	2.67	4.26	3.55	3.71	3.88	4.66	3.74
C1112	BE	6.32	5.2	5	6.8	10.53	5.24	6.13	5.47	7.23	7.07	8.85	6.4	6.83	7.16	5.98	6.09	4.79	5.27	5.97	6.29	5.7	5.38
C1112	BG	3.11	3.1	3.07	2.49	3.92	3.19	3.48	2.25	4.29	3.29	3.72	4.02	3.9	4.31	2.21	4.66	4.87	5.53	4.92	5.28	4.04	6.08
C1112	BG1
C1112	BG3											3.75	5.18	4.11	4.54	4.46	4.93	5.14	5.81	5.13	5.54	4.02
C1112	BG31											3.84	4.02	3.87	4.34	4.58	4.99		5.71	5.15		5.38
C1112	BG32											4.09	4.37	4.33	5.09	4.57	5.44	5.61	6.41	5.57		4.83
C1112	BG33											4.22	4.51	4.48	4.93	4.56	5.17		6.26	5.43	5.26	2.64
C1112	BG34											3.11	3.59	3.72	3.76	4.1	4.06	4.43	4.84	4.36	4.92	3.31
C1112	BG4											3.05	3.16	2.78	3.13	3.45	3.1	3.41	3.79	3.67	3.81	4.13
C1112	BG41				2.56							2.93	3.22	2.54	2.96	3.26	2.91	3.31	3.37	3.23		3.51
C1112	BG42											3.1	3.13	2.87	3.21	3.55	3.2	3.45	3.98	3.86		4.39
C1112	BGZ
C1112	BGZZ
C1112	CH							4.56	4.42	4.92	6.1	5.14	5.23	4.66	5.04	5.38	4.96	3.51	5.13	4.11	4.26	4.53	3.92
C1112	CY		2.04	2.29	2.07				2.12		2.66	2.48	2.31	2.75	2.26		3.01				2.62	2.56
C1112	CZ	2.81	3.21	3.27	3.69	4.35	3.7	3.36	2.91	3.85	3.41	3.51	4.41	4.09	4.15	4.85	4.26	4.54	4.05	4.14	3.84	4.31	4.93
C1112	DE	5.44	5.8	5.2	5.32	6.26	5.49	5.33	5.08	5.56	5.74	5.12	5.22	6.27	6.22	5.99	5.47	5.29	5.49	4.7	4.77	5.55	5.14
C1112	EE	2.02	2.22	2.03	2.39	2.36	2.92	2.3	3.1	2.76	2.88	2.6	2.66	3.1	3.39	3.65	4.09	2.66	3.45	2.45	3.77	3.73	2.54
C1112	EFTA
C1112	EL	2.66	2.45	3.06	2.71	3.23	2.81	2.73	2.61	3.15	2.87	2.89	3.31	3.06	3.14	3.44	2.39	3.3	2.53	2.77	3.06	3.23	3.02
C1112	EL1								2.62	3.16	3.02	3.05	3.51	3.08	3.41	3.47
C1112	EL2								2.44	2.95	2.82	2.96	2.33	2.87	3.75	3.23
C1112	EL3		1									2.83	3		3.17	2					2.16
C1112	EL4	1.52	1.38	1.73	1.52	1.8	1.59	1.54	1.47	1.73	1.72	1.83	1.78	1.71	1.74
C1112	EL41	1.71	1.53	2	1.73	2	1.78	1.79	1.69	2	1.93	2.36	2.1	2	2
C1112	EL41_42								1.43	1.73	2.05	1.9	1.7	1.71	1.75	1.88
C1112	EL42	1.1	1	1.25	1.12	1.17	1.17	1	1.08	1.36	1.27	1.4	1.4	1.4	1.4	1.01	1.25	1.26	1.21	1.2	1.2	1.21
C1112	EL43	2	2	1.67	1.33	2	2	2	1.5	1.75	1.75	2.5	2	2.33	2	2.06	1.22	1.75	2	1.94	1.84	2
C1112	EL5	2.54	2.33	2.92	2.59	3.09	2.68	2.6	2.5	3.01	2.72	2.78	3.27	2.93	3.07	3.38	2.2	3.22	2.46	2.69	3.11	3.34
C1112	EL51	2.82	2.6	3.23	2.87	3.42	2.99	2.86	2.78	3.43	2.85	1.99	3.54	3.25	3.32	3.6	2.94	3.82	3.69	2.71	3.39	3.32
C1112	EL52	2.57	2.33	2.95	2.6	3.12	2.7	2.63	2.51	2.97	2.9	2.09	3.04	2.96	3.24	3.28	1.66	2.93	1.81	2.88	2.99	3.14
C1112	EL53	2.31	2.14	2.66	2.36	2.81	2.44	2.38	2.27	2.74	2.62	4.14	3.64	2.67	3.02	3.27	2.78	3.24	2.57	2.37	3.12	3.67
C1112	EL54	1.38	1.64	1.58	1.42	1.73	1.48	1.41	1.34	1.61	1.58	2.8	2.6	1.59	2.86	2.21	2.84	3.16	3.33	3.03	3.04	3.27
C1112	EL6	3.42	3.17	3.93	3.49	4.16	3.61	3.51	3.36	4.05	3.87	3.7	3.59	3.9	3.58	3.96	3.42	3.78	3.01	3.28	2.98	2.78
C1112	EL61	3.66	3.4	4.2	3.73	4.45	3.86	3.76	3.59	4.33	4.14	4.06	3.96	4.22	3.95	4.53	3.7	4.22	3.15	3.49	3.07	2.81
C1112	EL62	2.39	2.17	2.74	2.45	2.92	2.51	2.43	2.34	2.81	2.71	3.2	3.2	2.76	3.02	2.89	3.1	2.85	2.83	2.69	2.67	2.71
C1112	EL63	2.71	2.48	3.15	2.78	3.31	2.88	2.8	2.67	3.21	3.07	2.46	3.14	3.13	2.38	2.9	2.59	2.79	2.93	3	3.01	3.13
C1112	EL64	2.66	2.45	3.05	2.71	3.22	2.82	2.74	2.6	3.15	3.01	2.23		3.07	3.06	2.58	2.49	3.24	3.05	3.18	3.03	2.96
C1112	EL65	2.52	2.32	2.89	2.59	3.07	2.68	2.59	2.47	2.99	2.85	3.19	2.24	2.6	3.32	3.17	2.89	2.17	2.19	2.4	2.38	2.32
C1112	ES	3.69	2.46	3.23	3.15	3.66	2.32	3.04	3.84	3.79	2.82	3.9	2.38	4.48	4.74	3.35	4.31	4.73	3.06	4.49	4.3	4.92	3.77
C1112	EU	6.67	6.37	6.66	6.12	6.46	5.95	5.72	5.05	3.42	3.76		3.44	4.09	4.13	4.15	6.25	3.93	3.79	3.3	3.76	4.33	6.03
C1112	EU28	5.33	5.16	5.32	4.9	6.03	5.5	4.67	5.05	3.42	3.76		3.44	4.08	4.13	4.15	6.25	3.93	3.79	3.3	3.76
C1112	FI	3.42	3.38	3.17	3.55	3.27	3.74	3.66	3.88	3.6	4.13	3.42	3.8	3.88	3.92	4.07	3.98	3.9	4.11	2.84	4.36	3.32	2.68
C1112	FR	5.72	5.32	6.27	5.7	6.89	5.66	6.09	5.86	6.45	6.6	6.21	5.67	7.22	6.32	6.24	6.31	4.89	6.45	6.42	6.81	6.2	6.64
C1112	HR	4.8	4.46	4.65	3.26	4.99	4.16	4.64	4.69	4.75	4.68	4.02	4.22	3.74	4.61	3.58	4.06	4.97	3.88	4.23	5.61	4.19	5.96
C1112	HR01											3.82	4.45
C1112	HR02											4.15	5.46	5.43	4.96	4.21	5.42	5.69	5.91	5.46	5.63	6.01
C1112	HR03											3.55	3.72	3.56	3.48	2.73	3.75	3.58	3.9	3.62	4.18	3.45
C1112	HU	3.59	4.29	2.86	2.32	4.18	3.39	3.21	2.59	4.12	3.22	3.67	3.77	3.18	3.21	3.61	4.03	4.35	3.66	3.06	4.04	4.11	3.79
C1112	IE	7.55	7.53	6.75	7.32	8.01	7.28	7.47	6.98	6.03	6.39	7.21	7.74	5.66	7.71	7.78	8.03	7.36	7.59	5.97	7.72	6.91	7.87
C1112	IS												1.2	3.86				3	4	2.67	2.5	2.58	2.85
C1112	IT	4.68	4.41	4.75	4.3	5.25	5.39	5.42	4.85	5.27	4.99	5.1	5.26	5.82	5.44	5.4	5.52	5.77	5.61	5.24	5.25	5.44	5.63
C1112	LT	2.62	2.6	2.82	3.4	3.45	3.24	2.08	3.07	3.01	3.41	3.06	3.47	3.89	3.71	4.31	4.22	3.42	3.51	2.73	3.15	4.04	2.97
C1112	LV	2.25	2.41	2.91	2.62	2.43	3.22	2.18	3.14	2.88	2.95		2.93	3.34	3.15	3.97	4.1	3.15	3.47	2.63	3.53	4.17	2.77
C1112	ME								2.45	3.58	3.66	3.43	3.26	2.81	3.88	2.75	2.88	3.17	3.23	3.25	2.82	3.07
C1112	MK	2.48	2.11	2.67	2.2	3.56	3.08	3.01	2.4	3.41	3.08	3.04	3.34	2.7	3.2	3.76	2.75	3.82	2.75	3.41	2.62	3.52	3.51
C1112	MT
C1112	NL	6.66	6.73	6.09	7.06	6.71	6.83	6.44	5.59	6.45	7.35	6.89	6.53	6.65	7.19	6.94	6.84	6.3	6.78	6.88	6.93	6.24	8.02
C1112	NO	4.56	4.03	4.05	4.56	4.71	4.85	4.12	4.35	4.87		4.54	3.81	4.06	3.83	4.86	5.7	4.58	5.23	2.32	5.54	4.79
C1112	PL	2.45	2.91	3.18	2.88	3.42	3.07	2.46	3.11	2.87	3.23	3.35	3.22	3.73	3.36	3.88	3.29	3.8	3.78	3.09	3.2	4.1	3.88
C1112	PT	2.16	2.47	2.1	2.46	2.81	1.85	2.47	1.93	2.38	3.1	3.11	3.87	3.87	4.18	2.13	4.41	2.39	4.56	2.56	2.67	2.75	2.74
C1112	PT1	2.16		2.1				2.47	1.93	2.38						2.13		2.39		2.56	2.67	2.75
C1112	PT11	1.31	0.84	1.64	1.3	1.46	1.07	1.44	1.39	1.18	0.96	0.9	0.95	0.86	1.53	1.2	1.04	1.04	1.17	1.71	1.93	1.71
C1112	PT15
C1112	PT16	1.76	1.16	1.89	1.3	1.41	1.17	1.87	1.77	2.44	1.79	1.46	1.33	1	1.59	1.77	1.79	1.95	1.72	1.99	2.51	2.39
C1112	PT17	2.58	1.78	2.51	2.3	2.5	1.72	3.12	4.13	3.53	2.69	1.39	1.5	1.19	2.19	2.42	2.3	3.11	2.87	3.5	4.66	4.47
C1112	PT18	2.42		2.4				2.57	1.99	2.48						2.3	2.28	2.66	2.32	2.81	2.83	2.96
C1112	RO	2.29	2.24	1.75	2.34	3.16	2.79	1.83	2.27	2.39	1.85	2.22	3.21	2.11	3.15	3.54	2.9	3.96	3.87	3.68	3.68	2.82	4.12
C1112	RS								3.74	4.3	4.08	3.37	4.21	3.98	4.26	3.95	4.12	4.85	4.09	6.7	4.38	3.96	4.53
C1112	SE	5.03	4.59	4.91	4.9	4.74	4.91	4.02	4.48	4.03	4.57	4.07	3.98	4.29	4.8	4.53	5	4.54	4.64	2.76	4.52	4.67	3.52
C1112	SI	4.25	4.6	4.89	2.35	4.53	4.06	4.19	4.16	3.07	3.96	2.46	2.52	2.38	2.16	2.4	5.11	5.19	5.03	4.38	5.23	5.8	5.77
C1112	SK	3.09	4	2.4	2.12	3.32	2.76	2.62	2.32	3.23	3.04	2.3	3.27	2.58	2.79	3.67	3.81	8.75	3.74	3.38	3.29	3.44	3.74
C1112	TR	2.23	2.03	2.1	2.09	10	10.75	5.71	2.15	2.22		2	2.66	2.65	2.77	2.37	2.81	2.74	2.84	2.78	2.86	3.03
C1112	TR1												3.83	4.31		4.15	4.24	4.49	4.93	4.62	4.92	4.5
C1112	TR2												3.12	3.97		3.81	4.53	3.77	3.83	3.5	4	3.77
C1112	TR21												3.29	4.55		4.21	4.99	4.1	4.14	3.66	4.31	3.96
C1112	TR22												2.79	2.83		2.93	3.48	3.03	3.14	3.13	3.22	3.31
C1112	TR3												2.36	2.66		2.5	2.95	2.54	2.73	2.69	2.74	2.9
C1112	TR31												3.03	3.79		3.3	3.88	3.61	3.38	3.59	3.39	3.55
C1112	TR32												2.96	3.36		3.06	3.6	3.18	3.4	3.2	3.42	3.71
C1112	TR33												2.09	2.34		2.24	2.64	2.23	2.46	2.46	2.49	2.62
C1112	TR4												2.57	2.62		2.4	2.85	3.57	5.26	2.82	2.77	2.95
C1112	TR41												2.65	2.7		2.33	2.76	3.96	6.28	2.96	2.89	3.01
C1112	TR42												2.34	2.42		2.64	3.15	2.58	2.68	2.38	2.4	2.78
C1112	TR5												2.97	2.5		2.2	2.61	2.4	2.52	2.74	2.9	3
C1112	TR51												2.56	2.45		1.79	2.12	2.51	2.39	2.42	2.63	2.81
C1112	TR52												3.27	2.54		2.52	2.99	2.31	2.6	3.02	3.13	3.14
C1112	TR6												3.06	3.3		2.64	3.12	3.01	3.19	3.37	3.36	3.56
C1112	TR61												2.44	2.44		2.22	2.61	2.23	2.36	2.48	2.56	2.7
C1112	TR62												3.02	3.5		2.61	3.1	3.14	3.41	3.58	3.46	3.67
C1112	TR63												3.39	3.53		2.92	3.44	3.3	3.4	3.64	3.76	3.97
C1112	TR7												2.5	2.21		1.88	2.23	2.36	2.25	2.48	2.4	2.57
C1112	TR71												2.56	2.31		1.86	2.21	2.44	2.44	2.72	2.69	2.74
C1112	TR72												2.46	2.15		1.9	2.25	2.31	2.12	2.32	2.21	2.45
C1112	TR8												2.72	2.38		2.05	2.44	2.78	2.52	2.46	2.67	2.58
C1112	TR81												1.68	1.83		1.74	2.05	1.51	1.51	1.57	1.56	1.91
C1112	TR82												2.03	1.96		2.11	2.5	2.27	2.24	2.26	2.41	2.34
C1112	TR83												2.97	2.54		2.06	2.45	3.02	2.67	2.57	2.81	2.69
C1112	TR9												1.22	1.73		1.19	1.42	1.85	1.98	1.95	1.88	2.11
C1112	TRA												1.65	1.76		1.61	1.91	1.77	1.55	1.82	1.66	2.09
C1112	TRA1												1.72	1.87		1.7	2.01	1.93	1.66	2.04	1.96	2.09
C1112	TRA2												1.58	1.66		1.53	1.82	1.6	1.43	1.57	1.35	2.09
C1112	TRB												1.61	1.53		1.51	1.8	1.93	1.95	2.11	1.99	2.14
C1112	TRB1												1.94	1.8		1.51	1.8	2.61	2.02	1.87	2.47	2.46
C1112	TRB2												1.45	1.39		1.51	1.8	1.63	1.93	2.21	1.77	1.97
C1112	TRC												2.96	3.13		2.79	3.32	3.11	3.25	3.14	3.24	3.82
C1112	TRC1												3.22	3.03		2.29	2.7	2.65	3.45	3.38	3.44	3.7
C1112	TRC2												3.07	3.3		2.86	3.41	3.24	3.08	3.14	3.29	3.84
C1112	TRC3												2.6	2.93		3.01	3.57	3.15	3.5	2.99	3.03	3.83
C1112	UK	7.96	7.04	7.95	7.75	7.73	7.91	7.98	7.14	8.23	7.88	7.63	7.7	6.62	7.34	8.53	8.92	7.8	8.18	7.67	8.83	7.08
C1112	UKC											7.94	7.97	6.33	6.47	8.13	9.01	7.67	8.14	7.76	9
C1112	UKC1
C1112	UKC2
C1112	UKD											6.02	6.53	4.94	5.25	5.51	7.19	6.37	5.72	4.89	6.28
C1112	UKD1
C1112	UKD3
C1112	UKD4
C1112	UKD6
C1112	UKD7
C1112	UKE											7.72	8.1	6.87	7.31	8.37	9.28	7.77	8.55	7.77	8.89
C1112	UKE1
C1112	UKE2
C1112	UKE3
C1112	UKE4
C1112	UKF											7.81	7.95	6.35	7.66	8.47	9.26	7.8	8.26	7.95	8.81
C1112	UKF1
C1112	UKF2
C1112	UKF3
C1112	UKG											7.25	7.43	6.26	6.64	8.19	8.4	7.55	7.78	7.04	8.58
C1112	UKG1
C1112	UKG2
C1112	UKG3
C1112	UKH											7.6	7.16	7.22	7.84	9.06	8.97	8.09	8.45	7.97	9.23
C1112	UKH1
C1112	UKH2
C1112	UKH3
C1112	UKI											8.45	7.96	7.96	6.96
C1112	UKI3
C1112	UKI4
C1112	UKI5
C1112	UKI6
C1112	UKI7
C1112	UKJ											7.82	8	7.02	7.22	8.74	9.03	7.71	8.33	7.97	9.17
C1112	UKJ1
C1112	UKJ2
C1112	UKJ3
C1112	UKJ4
C1112	UKK											7.24	7.98	5.53	6.73	8.01	8.04	7.44	7.79	7.65	8.29
C1112	UKK1
C1112	UKK2
C1112	UKK3
C1112	UKK4
C1112	UKL											7.12	7.38	5.66	6.56	7.76	7.1	7.39	7.44	6.77	8.03
C1112	UKL1
C1112	UKL2
C1112	UKM											8.22	8.07	6.62	7.46	9.02	8.37	8.32	8.06	6.74	8.62
C1112	UKM5
C1112	UKM6
C1112	UKM7
C1112	UKM8
C1112	UKM9
C1112	XK								3.39	4.07	3.48	3.76	3.76	3.35	3.85	3.6	3.39	4.1	3.98	3.46	3.55	4.25
C1120	AL	3.04	2.82	3.16	2.83	3.08	3.12	2.96	3.51	3.97	3.98	3.94	4.18	4.05		4.89	3.91	3.86		3.65	4.07	4.33
C1120	AT	2.77	3.82	3.91	3.8	4.98	4.02	4.79	3.43	5.07	3.95	4.5	5.09	3.07	5.11	4.76	4.61	5.3	3.98	4.15	4.8	4.78	4.54
C1120	AT1	2.77	3.82	3.9	3.8	4.98	4.04	4.79	3.43	5.07	3.96	4.5	5.1	3.06	5.12	4.78	4.61	5.31	3.96	4.14	4.79	4.75
C1120	AT11	2.82	3.32	3.01	3.8	4.8	3.4	4.53	3.06	4.47	3.42	4.31	4.99	3.15	4.9	4.52	4.58	4.83	3.84	3.29	4.14	4.15
C1120	AT12	2.77	4	4.2	3.8	5.03	4.24	4.9	3.55	5.26	4.1	4.55	5.14	3.04	5.17	4.86	4.61	5.46	4	4.37	4.97	4.93
C1120	AT13	1.5	3	5	3.5	4.45	2.5	6	3	3.5	5	4.45	5	2.93	5.26	4.67	4.87	5.24	4	3.68	4.43	4
C1120	AT2											4	3	4	4	3.14	4.57	4.57	5.44	4.38	5.28	5.78
C1120	AT21													2	3	3	5.17	5.2	4.33	4.5	4.86	5.75
C1120	AT22											3	5	2	6	3.2	4.12	4.62	5.14	5	5.08	5.86
C1120	AT3											4	3.83	3.8	3.8	3.17	4.62	4.46	5.58	5	5.59	5.5
C1120	AT31											3.5	3.8	4	4	2.83	4.62	4.6	5.56	5.23	5.46	5.37
C1120	AT32																3.5	3.5	6	5	6	8
C1120	AT33												4	3	3		3		5	3.5	6	5
C1120	AT34																	4
C1120	BA	3.28	2.38	3.04	2.27	3.71	3.09	3.2	3.49	3.75	3.8	2.66	3.57	3.73	3.95	2.53	3.48	4.34	4.21	4.07	3.88	4.66	4.88
C1120	BE	7.87	8	8.22	8.63	8.9	8.33	8.22	7.75	8.56	9.34	8.85	8.36	8.39	9.15	8.98	9.33	6.64	8.56	8.49	9.34	8.95	7.78
C1120	BE2
C1120	BE21
C1120	BE22
C1120	BE23
C1120	BE24
C1120	BE25
C1120	BE3
C1120	BE31
C1120	BE32
C1120	BE33
C1120	BE34
C1120	BE35
C1120	BEZ
C1120	BEZZ
C1120	BG	2.72	2.84	2.72	1.99	3.27	4.3	3.48	2.6	4.56	3.02	3.4	4.47	2.77	3.31	3.78	3.41	4.12	4.3	4.09	4.24	3.87	5.6
C1120	BG3													3.88	3.69	3.77	4.08	4.51	4.69	4.44	4.09	3.62
C1120	BG31											3.59	3.38	5.17	4.32				5.18	6.26
C1120	BG32											2.5	3.5	3.43	2.67			4	6.57	2.69
C1120	BG33											4.06	5.16	3.81	3.94		5		5.69	4.61	4.54	1.9
C1120	BG34											3.31	3.4	3.83	3.66	4.14	4.07	4.56	4.53	4.26	3.99	3.73
C1120	BG4											3.02	5.22	2.19	3.05	3.78	2.23	3.46	3.65	3.39	4.68	4.52
C1120	BG41				2.79							2.79	2	1.27	2.94	2.58	2.05	2.4	2	2.81		2.8
C1120	BG42											3.05	5.23	2.44	3.15	3.98	2.25	3.47	3.66	3.42		4.54
C1120	CH							5.93	6.04	6.23	6.1	5.83	6.38	5.83	5.5	6.31	6.06	4.42	6.16	5.72	5.82	4.67	4.01
C1120	CH01																					4.76
C1120	CH02																					4.6
C1120	CH03																					4.86
C1120	CH04																					4.67
C1120	CH05																					4.86
C1120	CH06																					4.5
C1120	CH07
C1120	CY	1.69	2.04	2.29	2.07		1.84		2.12		2.66	2.48	2.31	2.75	2.26		3.02		2.01	1.6	2.89	2.6	2.07
C1120	CZ	4.21	4.85	4.56	4.07	5.84	5.05	4.49	4.86	5.77	5.24	4.99	5.69	4.32	5.67	6.51	6.36	6.5	5.67	5.39	5.73	6.14	6.32
C1120	CZ01
C1120	CZ02
C1120	CZ03
C1120	CZ04
C1120	CZ05
C1120	CZ06
C1120	CZ07
C1120	CZ08
C1120	DE	5.05	5.06	5.38	4.75	6.11	4.93	5.3	5	5.95	5.79	5.31	4.75	4.91	6.13	6.51	4.64	5.32	5.76	4.57	4.91	5.38	5.52
C1120	DE1	5.22	5.75	5.2	4.2	6.67	5.45		4.88	7	5.5	5.34						4.37				6.64
C1120	DE11				4.5
C1120	DE12				5
C1120	DE13
C1120	DE14
C1120	DE2	5.1	5.29	5.44	4.5	6.69	5.27	5.47	5	5.67	5.4	5.25			4			5.07		5.28		6.06
C1120	DE21				4
C1120	DE22
C1120	DE23
C1120	DE24
C1120	DE25				5.5
C1120	DE26				4.43
C1120	DE27				3
C1120	DE4						3
C1120	DE7	4.62	4.67	6.2	3.6	6	5.2	5	4.8	6	5.29
C1120	DE71				4
C1120	DE72				4
C1120	DE73				3
C1120	DE9
C1120	DE91
C1120	DE92
C1120	DE93
C1120	DE94
C1120	DEA								5
C1120	DEA1
C1120	DEA2
C1120	DEA3
C1120	DEA4
C1120	DEA5
C1120	DEB	5.53	5.78	5.56	5.08	5.77	5.24	5.87	5.07	6.3	6	6.39						3.7	5.16	5.16	5.12	5.13
C1120	DEB1				5
C1120	DEB2
C1120	DEB3				5
C1120	DED	4	3	2							8	5.24	5		4	6.5	5	5.57	5	4.17	5.14	5.28
C1120	DED2
C1120	DEE	4.6	4.94	5.08	4.8	5.69	4.47	4.65	4.86	6.13	5.78	5.37	4.78	5.19	6.6	6.96	4.1	5.73	5.24	3.31	3.59	4.42
C1120	DK01
C1120	DK02
C1120	DK03
C1120	DK04
C1120	DK05
C1120	EE	2.13	2.26	2.33	2.18	2.51	3.08	2.42	3.47	3.18	3.01	2.74	2.81	3.9	3.28	3.99	4.79	2.77	4.2	2.91	5.07	5	4.09
C1120	EFTA
C1120	EL	2.26	1.96	1.93	1.88	2.09	2.03	2.3	1.96	3.06	2.86	3.29	3.64	2.84	2.87	3.05	2.46	3.02	2.43	2.61	2.69	3.02	2.6
C1120	EL1								2.19	3.05	2.64	2.55	3.16	2.84	3.14	3.08
C1120	EL2								2.42	3.38	2.92	2.89	3.47	3.14	3.4	3.41
C1120	EL3	1.92	1.07	1.07	1.02	1.13	1.13	1.25	1.19	1.66	1.43	1.84	2.56	1.54	1.73	1.97	4.76	2.3	2.48	1.16	2.48	2.48
C1120	EL4	1.39	1.21	1.21	1.16	1.29	1.29	1.42	1.36	1.88	1.63	1.62	2.42	1.76	1.69				1.49		1.7
C1120	EL41	1.64	1.44	1.44	1.38	1.54	1.53	1.68	1.62	2.26	1.95	2.24	2.04	2.09	1.86	1.62	1.01	1.01	1.57	0.96	1.64	0.93
C1120	EL41_42								1.35	1.88	1.63	1.48	2.4	1.75	1.67	1.89
C1120	EL42	1.29	1.12	1.12	1.07	1.19	1.19	1.31	1.25	1.74	1.51		3.05	1.62	1.62						1.6
C1120	EL43	3	2.5	2.5	2.5	3	3	4	4	5	5	4	4	4	5	4	4.67	5.64	3.83	5.11	5.17	3.4
C1120	EL5	1.91	1.66	1.6	1.59	1.77	1.76	1.95	1.65	2.59	2.59	2.77	3.46	2.41	2.41	2.68	1.83	2.5	2.11	2.1	2.48	2.75
C1120	EL51	2.37	2.05	1.82	1.97	2.2	2.2	2.42	2.17	3.25	3.15	2.58	4.21	2.99	3.16	3.21	2.22	3.31	3.92	2.11	3.37	3.63
C1120	EL52	1.78	1.55	1.54	1.49	1.65	1.65	1.82	1.62	2.41	2.29	2.41	2.66	2.25	2.41	2.45	1.48	2.18	1.32	2.22	2.29	2.41
C1120	EL53	1.8	1.57	1.54	1.5	1.67	1.61	1.83	1.71	2.44	2.08	2.74	3.57	2.27	2.79	2.76	2.8	2.58	2.3	1.69	2.21	2.77
C1120	EL54	2	1	1	1	1	1	2	2	2		2	2	2	2.64	2.67	2.6	1.4	2.67	1.86	2.43	2.33
C1120	EL6	2.91	2.53	2.53	2.43	2.69	2.51	2.97	2.54	3.95	3.51	4.04	3.94	3.67	3.68	3.73	3.3	3.75	2.8	3.29	2.96	3.42
C1120	EL61	3.09	2.7	2.7	2.58	2.87	2.72	3.15	2.89	4.2	3.7	3.88	4.26	3.9	3.86	4.1	3.37	4.06	2.71	3.34	2.99	3.65
C1120	EL62	1.3	1.12	1.12	1.09	1.21	1.21	1.36	1.29	1.77	1.53	2.35	2.29	1.65	2.1	1.72	1.94	2.14	2.41	3.42	2.88	4.11
C1120	EL63	1.61	1.4	1.4	1.34	1.49	1.49	1.64	1.56	2.18	1.88	2.67	2.1	2.03	2.07	2.01	1.94	1.69	2.25	1.24	2.16	1.89
C1120	EL64	2.67	2.33	2.33	2.23	2.48	2.16	2.73	2.35	3.63	3.14	3.14	3.68	3.38	3.57	3.57	3.21	3.21	3.04	3.29	2.98	2.97
C1120	EL65	1.68	1.46	1.46	1.4	1.55	1.56	1.71	1.62	2.28	1.97	2.16	2.06	2.12	2.48	1.77	2.66	2.35	2.21	2.25	2.14	2.34
C1120	ES	2.29	2.2	2.38	2.23	2.92	1.81	2.74	3.04	2.28	2.6	2.1	2.49	2.43	2.84	2.91	2.78	2.47	2.66	3.58	2.76	3.28	2.61
C1120	ES1					1								1.3							3	2.5
C1120	ES11																				3	2.5
C1120	ES12					1
C1120	ES13													1.3
C1120	ES2				1.23	2.33		1.69				1.8	7.02		2.56	1.89	1.98	2.95	2	2.22	1.87	3.06
C1120	ES21																		2
C1120	ES22				2	2.31	1.7						7.02		2.46	2.41	3.46	4.24	3.79	3.81	3	3.63
C1120	ES23	4.1	3.05	4.1	3.1		2					4.2		3.58	5	2.83	4.67	5.4	5.75	5.2	5	6
C1120	ES24				1.18	2.33		1.71				1.81			2.56	1.89	1.98	2.94	1.98	2.2	1.87	3.06
C1120	ES4	3.08	2.4	2.8	2.29	2.28		2.16				2.06	5.5	1.68	2.83	2.02	2.21	3.38	2.7	4.13	2.62	3.63
C1120	ES41	2.71	1.58	2.15	2.03	2.38		1.99				2.92	5.5	2.69	4.11	3.09	3.48	4.82	2.49	4.63	3.71	4.95
C1120	ES42	2.35	1.44	1.81	1.24	1.74		1.65				1.76	5.51	1.87	2.83	1.76	1.97	3.77	3.21	3.84	2.21	3.93
C1120	ES43	3.55	3.1	3.4	2.88	2.57		2.49				2.04			2.44	1.82	2.12	2.35	2.31	4.09	2.28	3.06
C1120	ES5	2.03	1.39	1.64	1.53	2.98	3.07	1.55				3.82	3.91	3.52	4.86	2.96	3.45	3.04	2.79	3.54	2.26	4.07
C1120	ES51	2.55	2.05	3.1	2	3.13	7.2	2				3.83	4.09	3.55	5.05	3.94	4.94	5.04	3.48	4.7	2.77	4.54
C1120	ES52			1.64	1.44							3.7		3.33	3.33		2.1		1.78	1.88		3.45
C1120	ES53		1.23	1.27									3.75		1	1.67		1.5	1
C1120	ES6	2.55	2.66	2.94	2.69	3.42		3.41				2.25	2.86		2.99	3.4	3.16	2.19	2.98	4.16	3.17	3.34
C1120	ES61	2.55	2.66	2.94	2.69	3.42		3.41				2.25	3.01		3	3.42	3.17	2.19	2.98	4.16	3.17	3.34
C1120	ES62				1.22	1.84		1.8				3.55	2.26	1.94	1.91					1.82		2.33
C1120	ES64
C1120	EU	2.62	2.27	2.5	2.26	3.03	2.48	3.06	2.89	3.26	3.13	3.27	3.44	3.24	3.43	3.45	3.51	3.58	3.54	3.61	3.56	3.59	3.62
C1120	EU28	2.62	2.28	2.51	2.26	3.03	2.49	4.67	2.89	3.26	3.13	3.27	3.44	3.24	3.43	3.45	3.51	3.58	3.54	3.61	3.56
C1120	FI	3.58	3.36	3.25	3.52	3.3	3.75	3.6	3.96	3.63	4.12	3.48	3.9	3.95	3.87	4.13	4.16	3.88	4.18	2.82	4.63	3.45	3.24
C1120	FI1
C1120	FI13
C1120	FI19
C1120	FI1A
C1120	FI1B
C1120	FI1C
C1120	FI1D
C1120	FR	4.93	4.36	4.75	4	5.07	4.78	4.58	4.32	4.86	5	4.97	4.79	5.39	5.24	5.12	5.6	4.16	5.66	5.01	6.31	5.19	5.35
C1120	FR2	6.59	5.97	6.98	5.05	6.85	6.34	5.63	5.56	6.46	6.76	5.73	6.15	5.97	6.33		7.1	2.29
C1120	FR4											4.67	4.95	4.94	4.95		4.75	3.6
C1120	FR5	5.88	5.45	6.66	5.88	6.36	6.43	5.74	5.01	5.72	6.45	5.05	5.43	6.56	5.99		6.77	4.65
C1120	FR6	5.16	4.8	4.91	4.08	5.19	5.03	4.88	3.84	4.92	4.24	5.34	4.44	5.7	4.65		5.24	5.56
C1120	FR7	4.56	3.97	4.78	2.88	3.92	4.47	4.25	4.15	4.07	3.8	4.89	3.79	5.18	5.29		5.33	5.36
C1120	FR8	3.88	3.28	3.71	3.1	3.81	3.46	2.96	3.47	3.55	3.33	3.77	3.52	3.69	4.37		3.79	4.2
C1120	FR9
C1120	FR91
C1120	FRA
C1120	FRA2
C1120	FRA3
C1120	FRA4
C1120	FRB													6	6.38	6.8	7.13	2.26	6.36	6.8	7.58	6.27
C1120	FRC													5.53	4.65	4.85	5.05	3.72	6.12	6.05	6	4.31
C1120	FRC1	5.9	5.9	6.9	3.95	5.45	3.95		4.15	4.16	6.66	5.73	5.93	5.53	4.65	4.85	5.05	3.7	6.16	6.04	5.98	4.05
C1120	FRC2																	3.75	5.71	5.78	6.04	5.64
C1120	FRD													4.77	5.63	5.79	5.75	4.24	5.82	5.62	5.88	4.59
C1120	FRD1	4.45	4.2	5.95	5.93	5.93	4.93	4.6	4.92	6	5.78	5.61	4.73	4.65	5.62	5.34	5.43	2.96	5.51	5.44	5.95	4.35
C1120	FRD2	6.9	6.9	4	3			4	5.5	6.32	6.43	6.38	5.86	4.85	5.64	6.14	6.14	5.46	5.91	5.71	5.88	4.79
C1120	FRE													6.02	5.88	5.93	5.88	5.5	5.97	5.97	6.86	6.09
C1120	FRE1																6.08	5.91	5.94	5.92	6.71	6.05
C1120	FRE2	6.04	5.27	5.93	6.18	6.6	4.45	6.4	6.4	6.5	6.38	6.14	5.68	6.02	5.88	5.93	5.64	5.21	6.1	6.05	6.67	5.94
C1120	FRF													5.01	5.44	5.25	5	4.07	5.82	5.24	5.73	5.49
C1120	FRF1																					5.94
C1120	FRF2	5.6	4.94	5.34	4.34	7.7	7.18	6.68	5.43	5.6	5.61	4.89	4.88	5.04	5.78	5.6	5.28	4.09	5.79	5.3	5.73	5.19
C1120	FRF3											4.67	4.95	4.94	4.95	4.84	3.5	4	6	4.8
C1120	FRG													7	6.37	6.59	6.86	4.95	6.46	6.32	7.41	5.1
C1120	FRH																				5.03	4.58
C1120	FRI													6.26	5.92	6.17	6.65	4.49	5.96	5.81	7.31	5.51
C1120	FRI1	4.27	3.63	6.6	4.6	5.2	5.27	4.94	4.79	4.74	4.96	5.47	4.13	5.55	4.88	4.8	5.37	4.81	5.68	5.06	6.07	4.44
C1120	FRI2																	3.65	5.03	4.62	4.58	4
C1120	FRI3	5.88	5.74	6.3	5.2	5.89	6.09	5.51	5.13	5.74	6.15	5.25	4.9	6.29	5.98	6.27	6.71	4.47	5.99	5.85	7.37	5.57
C1120	FRJ													4.97	4.59	4.25	4.69	4.9	5.24	3.74	5.46	4.35
C1120	FRJ1	4.04	3.4	3.93	3.48	4.11	3.52	3.25	3.51	3.53	3.47	3.86	3.6	3.84	4.52	3.45	3.99	3.94	4.52	3.38	4.42	3.96
C1120	FRJ2	5.17	4.79	4.9	4.08	5.2	5.03	4.88	3.84	4.92	4.23	5.34	4.45	5.7	4.64	5.13	5.24	5.59	5.69	3.96	6.2	4.61
C1120	FRK													5.18	5.29	4.65	5.33	5.36	6.13	5	5.34	5.26
C1120	FRK1																4.94	4.94	5.3	5.44	4.65	4.94
C1120	FRK2	4.56	3.97	4.78	2.88	3.92	4.47	4.25	4.15	4.07	3.8	4.89	3.79	5.18	5.29	4.65	5.34	5.37	6.16	4.99	5.36	5.26
C1120	FRL													3.46	4.15	3.17	3.46	4.44	4.26	3.33	3.35	3.46
C1120	FRM															2	2	2	3	3	3	2.5
C1120	FRY
C1120	FRY1
C1120	FRY2
C1120	FRY3
C1120	FRY4
C1120	FRY5
C1120	HR	4.8	4.46	4.65	3.26	4.99	4.16	4.64	4.69	5.01	4.61	3.6	4.74	5.51	4.49	5.35	6.61	4.98	5.2	4.2	4.52	4.28	4.77
C1120	HR01											3.72	4.55
C1120	HR02											3.94	4.96	5.7	4.53	5.54	6.6	4.98	5.42	4.27	4.59	4.26
C1120	HR03											1.53	3.94	3.5	5		3		3	2.5	5.5	2.75
C1120	HR05														4.53	5.54	6.6	4.98	5.42	4.27	4.59	2
C1120	HR06														4.53	5.54	6.6	4.98	5.42	4.27	4.59	4.72
C1120	HU	2.99	3.54	3.92	2.13	4.47	4.31	4.08	3.67	4.28	3.62	3.25	4.06	3.72	4.42	4.64	4.88	5.03	4.74	4.72	4.4	4.47	5.42
C1120	HU1	2.98	3.35	2.27	1.36	4.4	5.3	2.98	4.18	4.63	2.86	3.58	4.12	2.86	3.49	4.36	4.4	4.85	5.38	4.95	3.99	3.48
C1120	HU11														3.36	3	4.33	7	4	3.62	5.25
C1120	HU12														3.51	4.39	4.4	4.86	5.42	4.99	3.97	3.48
C1120	HU2	3.23	3.77	4.21	2.5	4.6	4.56	4.17	3.69	4.39	3.77	3.6	4.07	3.57	4.3	5.47	5.08	5.22	4.37	4.61	4.47	4.5
C1120	HU21	3.07	3.15	4	2.67	2.47	3.5	4.15	3.63	3.18	3.22	3.59	3.79	3.78	4.09	5.39	5.18	5.49	4.3	4.83	4.28	4.11
C1120	HU22	2.85	3.22	3.18	2.21	5.41	3.6	3.68	3.48	3.57	3.67	3.16	3.88	3	3.91	5.5	4.82	4.82	3.84	4.34	4.33	4.31
C1120	HU23	3.5	4.22	4.43	2.58	4.64	4.88	4.36	3.77	5.17	4.2	3.89	4.27	3.72	4.56	5.52	5.15	5.37	5.07	4.76	4.9	5.34
C1120	HU3	2.87	3.43	4.02	2	4.39	3.9	4.12	3.69	4.25	3.62	3	4.05	3.86	4.57	4.2	4.8	4.88	5.02	4.76	4.43	4.59
C1120	HU31	2.52	3.06	1.99	1		3		2		3.97	2.96	3.19	3.28	4.06	4.47	4.5	4.62	3.31	4.63	4.29	4.19
C1120	HU32	2.86	3.41	2.35	1.32	4.15	4.09	2.33	2	3.98	3.36	2.38	3.7	3.62	4.84	3.61	4.54	4.4	4.96	4.32	5.04	4.52
C1120	HU33	2.95	3.53	5.06	2.13	4.44	3.88	4.23	3.81	4.31	3.71	3.2	4.19	4.12	4.58	4.36	5.11	5.08	5.46	4.91	4.25	4.65
C1120	IE	8.81	8.59	7.92	7.99	9.24	8.04	8.76	7.68	8.12	7.65	8.23	9.26	6.69	8.66	9.48	10	8.98	9.46	8.37	9.38	7.77	10.05
C1120	IE01
C1120	IE02
C1120	IE04
C1120	IE05
C1120	IE06
C1120	IS												1	3.86				3	4	2.67	2.5	2.58	2.85
C1120	IT	2.56	2.15	2.43	2.18	3.09	2.88	2.94	2.69	3.18	2.86	3.01	3.14	3.26	3.24	3.25	3.39	3.79	3.35	3.37	3.27	3.33	3.44
C1120	ITC	5.4	4.99	5.19	4.97	5.58	5.65	5.73	4.76			5.31	4.95	5.57	4.97		5.5	5.91	6.26	5.12	4.65	4.9
C1120	ITC1	5.27	4.48	4.72	4.69	5.77	6.04	5.66	4.54			4.37	4.41	2.3	6.72		4.15	5.46	4.2	3.38	6.06	4.24
C1120	ITC2
C1120	ITC3											3.5
C1120	ITC4	5.47	5.71	5.52	5.16	5.54	5.7	5.83	4.83			5.47	5.16	5.98	4.75	5.92	5.67	5.97	6.52	5.38	4.49	5.05
C1120	ITD	5.13	4.92	5.14	5.09	6.15	6.5	5.97	4.78			5.06	5.84	6.04	5.23	6.02
C1120	ITE	3.45	2.81	3.25	2.58	3.87	3.73	3.6	3.54			3.48	3.75	3.78	3.69	3.75
C1120	ITF	2.4	1.92	2.61	1.89	2.87	2.82	2.8	2.24			2.69	2.88	3.9	3.15	3.05	3.01	3.52	2.95	3.02	3.01	3.07
C1120	ITF1	3.85	3.78	3.64	2.89	3.64	3.56	3.63	3.14			3.77	3.62	3.74	4.25	3.9	3.91	4.01	3.97	3.62	3.69	3.86
C1120	ITF2	2.52	2.57	2.7	2.6	2.64	2.43	2.96	2.96			3.4	2.99	2.77	2.9	2.9	2.87	2.91	3.63	3.58	3.63	3.73
C1120	ITF3	2.79	2.59	3.08	2.57	3.03	3.07	2.96	2.58			2.41	2.71	3.33	3.25	2.3	3.29	3.31	3.18	3.4	2.95	3.5
C1120	ITF4	2.62	1.54	2.72	1.7	2.94	2.59	2.64	1.82			2.46	2.84	2.6	3.06	3.09	2.86	3.76	2.73	2.85	2.89	2.87
C1120	ITF5	1.64	1.7	1.93	1.58	2.65	3.21	2.89	2.58			2.83	2.9	4.02	3.24	3.21	3.19	3.23	2.9	2.94	2.93	2.93
C1120	ITF6	1.9	2.19	2.56	1.93	2.57	2.94	2.82	2.46			2.96	2.42	2.49	2.97	2.81	2.76	2.87	2.75	2.78	2.8	2.85
C1120	ITG	1.95	1.93	1.16	2.2	2.59	2.1	2.37	2.55			2.54	2.59	2.8	2.61	2.74	2.9	2.86	2.88	2.86	2.78	2.81
C1120	ITG1	2.22	2.04	1.19	2.47	2.68	2.28	2.57	2.77			2.64	2.67	2.74	2.68	2.8	2.91	2.83	2.9	2.85	2.78	2.82
C1120	ITG2	0.9	1.46	1.09	1.2	2.25	1.51	1.56	1.69			1.77	1.9	2.38	2.11	2.32	2.79	3.09	2.71	2.89	2.77	2.66
C1120	ITH																6.17	6.43	6.94	5.97	5.2	6.02
C1120	ITH1
C1120	ITH2																				4	3
C1120	ITH3	4.94	4.66	4.56	4.18	5.93	6.13	6.54	3.44			5.54	5.5	6.44	5.07	6.28	6.34	5.75	6.83	6.13	4.68	5.95
C1120	ITH4	6.9	3.95	5.9	4.12	6.12	6.18	4.2	4.03				4.25	4.24	4.45		5.17	5.48	5.3	4.88	4.24	3.67
C1120	ITH5	5.13	4.95	5.18	5.15	6.19	6.52	5.97	4.87			4.98	5.93	6.01	5.26	6.03	6.14	6.59	6.97	5.94	5.33	6.03
C1120	ITI																4.03	4.19	3.53	3.79	3.86	3.92
C1120	ITI1	3.05	2.43	2.93	1.95	3.55	3.44	3	3.26			2.98	3.26	3.14	3.33	3.53	3.33	3.49	2.59	3.28	3.39	3.76
C1120	ITI2	3.92	3.36	4.05	3.01	4.42	4.48	4.51	4.78			5.49	5.54	5.79	5.82	5.73	5.69	4.96	4.23	4.66	4.75	4.58
[truncated: 19,537 more rows]
