# Supplementary material
Source: MDPI journal article supplement (https://www.mdpi.com/2076-3417/13/10/6349)
Supplement: s1 [file s1 › DataProcessing/CountryCodes.csv]

Country ID	Country Name
AT	Austria
BE	Belgium
BG	Bulgaria
HR	Croatia
CY	Cyprus
CZ	Czechia
DK	Denmark
EE	Estonia
FI	Finland
FR	France
DE	Germany
GR	Greece
HU	Hungary
IE	Ireland
IT	Italy
LV	Latvia
LT	Lithuania
LU	Luxembourg
MT	Malta
NL	Netherlands
PL	Poland
PT	Portugal
RO	Romania
SK	Slovakia
SI	Slovenia
ES	Spain
SE	Sweden
AL	Albania
AD	Andorra
AM	Armenia
BY	Belarus
BA	Bosnia and Herzegovina
FO	Faroe Islands
GE	Georgia
GI	Gibraltar
IS	Iceland
IM	Isle of Man
XK	Kosovo
LI	Liechtenstein
MK	Macedonia
MD	Moldova
MC	Monaco
ME	Montenegro
NO	Norway
RU	Russian Federation
SM	San Marino
RS	Serbia
CH	Switzerland
TR	Turkey
UA	Ukraine
UK	UK
GB	UK
VA	Vatican City State
