# Supplementary material
Source: MDPI journal article supplement (https://www.mdpi.com/2076-3417/13/10/6349)
Supplement: s1 [file s1 › DataProcessing/NUTS2_ChangeCompilation_1999-2021.xlsx]

## Sheet: All
Index	Period	Code_OLD	Code_NEW	Label	Change	Explanation
0	1999-2003	BE1	BE10	Région de Bruxelles-Capitale / Brussels Hoofdstedelijk Gewest	Code change
1	1999-2003		BEZZ	Extra-Regio	New region
2	1999-2003	DK	DK00	Danmark	Code change
3	1999-2003		DKZZ	Extra-Regio	New region
4	1999-2003	DE3	DE30	Berlin	Code change
5	1999-2003	DE4		Brandenburg	Split
6	1999-2003	DE4 (part)	DE41	Brandenburg - Nordost	New region
7	1999-2003	DE4 (part)	DE42	Brandenburg - Südwest	New region
8	1999-2003	DE5	DE50	Bremen	Code change
9	1999-2003	DE6	DE60	Hamburg	Code change
10	1999-2003	DE8	DE80	Mecklenburg-Vorpommern	Code change
11	1999-2003	DEC	DEC0	Saarland	Code change
12	1999-2003	DEF	DEF0	Schleswig-Holstein	Code change
13	1999-2003	DEG	DEG0	Thüringen	Code change
14	1999-2003		DEZZ	Extra-Regio	New region
15	1999-2003	GR3	GR30	Aττική	Code change
16	1999-2003		GRZZ	Extra-Regio	New region
17	1999-2003	ES3	ES30	Comunidad de Madrid	Code change
18	1999-2003	ES63		Ceuta y Melilla	Split
19	1999-2003	ES63 (part)	ES63	Ciudad Autónoma de Ceuta	New region
20	1999-2003	ES63 (part)	ES64	Ciudad Autónoma de Melilla	New region
21	1999-2003	ES7	ES70	Canarias	Code change
22	1999-2003		ESZZ	Extra-Regio	New region
23	1999-2003	FR1	FR10	Île de France	Code change
24	1999-2003	FR3	FR30	Nord - Pas-de-Calais	Code change
25	1999-2003		FRZZ	Extra-Regio	New region
26	1999-2003		IEZZ	Extra-Regio	New region
27	1999-2003	IT11	ITC1	Piemonte	Code change
28	1999-2003	IT12	ITC2	Valle d'Aosta/Vallée d'Aoste	Code change
29	1999-2003	IT13	ITC3	Liguria	Code change
30	1999-2003	IT2	ITC4	Lombardia	Code change
31	1999-2003	IT31		Trentino-Alto Adige	Split
32	1999-2003	IT31 (part)	ITD1	Provincia Autonoma Bolzano/Bozen	New region
33	1999-2003	IT31 (part)	ITD2	Provincia Autonoma Trento	New region
34	1999-2003	IT32	ITD3	Veneto	Code change
35	1999-2003	IT33	ITD4	Friuli-Venezia Giulia	Code change
36	1999-2003	IT4	ITD5	Emilia-Romagna	Code change
37	1999-2003	IT51	ITE1	Toscana	Code change
38	1999-2003	IT52	ITE2	Umbria	Code change
39	1999-2003	IT53	ITE3	Marche	Code change
40	1999-2003	IT6	ITE4	Lazio	Code change
41	1999-2003	IT71	ITF1	Abruzzo	Code change
42	1999-2003	IT72	ITF2	Molise	Code change
43	1999-2003	IT8	ITF3	Campania	Code change
44	1999-2003	IT91	ITF4	Puglia	Code change
45	1999-2003	IT92	ITF5	Basilicata	Code change
46	1999-2003	IT93	ITF6	Calabria	Code change
47	1999-2003	ITA	ITG1	Sicilia	Code change
48	1999-2003	ITB	ITG2	Sardegna	Code change
49	1999-2003		ITZZ	Extra-Regio	New region
50	1999-2003	LU	LU00	Luxembourg (Grand-Duché)	Code change
51	1999-2003		LUZZ	Extra-Regio	New region
52	1999-2003		NLZZ	Extra-Regio	New region
53	1999-2003		ATZZ	Extra-Regio	New region
54	1999-2003	PT12	PT16 (part)	Centro (P)	Merged
55	1999-2003		PT16	Centro (P)	New region
56	1999-2003	PT13		Lisboa e Vale do Tejo	Split
57	1999-2003		PT17	Lisboa	New region
58	1999-2003	PT14	PT18 (part)	Alentejo	Merged
59	1999-2003		PT18	Alentejo	New region
60	1999-2003	PT2	PT20	Região Autónoma dos Açores	Code change
61	1999-2003	PT3	PT30	Região Autónoma da Madeira	Code change
62	1999-2003		PTZZ	Extra-Regio	New region
63	1999-2003	FI16	FI18 (part)	Uusimaa	Merged
64	1999-2003		FI18	Etelä-Suomi	New region
65	1999-2003	FI17		Etelä-Suomi	Split
66	1999-2003		FI19	Länsi-Suomi	New region
67	1999-2003	FI14		Väli-Suomi	Split
68	1999-2003	FI15	FI1A (part)	Pohjois-Suomi	Merged
69	1999-2003		FI1A	Pohjois-Suomi	New region
70	1999-2003	FI2	FI20	Åland	Code change
71	1999-2003		FIZZ	Extra-Regio	New region
72	1999-2003		SEZZ	Extra-Regio	New region
73	1999-2003	UKN	UKN0	Northern Ireland	Code change
74	1999-2003		UKZZ	Extra-Regio	New region
75	2003-2006	BG11		Северозападен	Boundary shift
76	2003-2006		BG31	Северозападен	New region
77	2003-2006	BG12		Северен централен	Boundary shift
78	2003-2006		BG32	Северен централен	New region
79	2003-2006	BG13		Североизточен	Boundary shift
80	2003-2006		BG33	Североизточен	New region
81	2003-2006		BG34	Югоизточен	New region
82	2003-2006	BG23		Югозападен	Boundary shift
83	2003-2006	BG22		Южен централен	Boundary shift
84	2003-2006	BG21	BG41	Югозападен	Code change
85	2003-2006		BG42	Южен централен	New region
86	2003-2006	DK00		Danmark	Split
87	2003-2006	DK00 (part)	DK01	Hovedstaden	New region
88	2003-2006	DK00 (part)	DK02	Sjælland	New region
89	2003-2006	DK00 (part)	DK03	Syddanmark	New region
90	2003-2006	DK00 (part)	DK04	Midtjylland	New region
91	2003-2006	DK00 (part)	DK05	Nordjylland	New region
92	2003-2006	DEE1	DEE0 (part)	Dessau	Merged
93	2003-2006	DEE2	DEE0 (part)	Halle	Merged
94	2003-2006	DEE3	DEE0 (part)	Magdeburg	Merged
95	2003-2006		DEE0	Sachsen-Anhalt	New region
96	2003-2006	NL12	NL12	Friesland (NL)	Name change
97	2003-2006	AT11	AT11	Burgenland (A)	Name change
98	2003-2006	RO06	RO11	Nord-Vest	Code change
99	2003-2006	RO07	RO12	Centru	Code change
100	2003-2006	RO01	RO21	Nord-Est	Code change
101	2003-2006	RO02	RO22	Sud-Est	Code change
102	2003-2006	RO03	RO31	Sud - Muntenia	Code change, name changes
103	2003-2006	RO08	RO32	Bucureşti - Ilfov	Code change, name changes
104	2003-2006	RO04	RO41	Sud-Vest Oltenia	Code change, name changes
105	2003-2006	RO05	RO42	Vest	Code change
106	2003-2006	SI00		Slovenija	Split
107	2003-2006	SI00 (part)	SI01	Vzhodna Slovenija	New region
108	2003-2006	SI00 (part)	SI02	Zahodna Slovenija	New region
109	2003-2006	SE01	SE11	Stockholm	Code change
110	2003-2006	SE02	SE12	Östra Mellansverige	Code change
111	2003-2006	SE09	SE21	Småland med öarna	Code change
112	2003-2006	SE04	SE22	Sydsverige	Code change
113	2003-2006	SE0A	SE23	Västsverige	Code change
114	2003-2006	SE06	SE31	Norra Mellansverige	Code change
115	2003-2006	SE07	SE32	Mellersta Norrland	Code change
116	2003-2006	SE08	SE33	Övre Norrland	Code change
117	2003-2006	UKE1	UKE1	East Yorkshire and Northern Lincolnshire	Name change
118	2003-2006	UKK1	UKK1	Gloucestershire, Wiltshire and Bristol/Bath area	Name change
119	2003-2006	UKM1		North Eastern Scotland	Boundary shift
120	2003-2006		UKM5	North Eastern Scotland	New region
121	2003-2006	UKM4		Highlands and Islands	Boundary shift
122	2003-2006		UKM6	Highlands and Islands	New region
123	2006-2010	DE41	DE40 (part)	Brandenburg - Nordost	Merged
124	2006-2010	DE42	DE40 (part)	Brandenburg - Südwest	Merged
125	2006-2010		DE40	Brandenburg	New region	DE40 = DE41 + DE42
126	2006-2010	DED1		Chemnitz	Boundary shift
127	2006-2010		DED4	Chemnitz	New region	recalculation by NSI
128	2006-2010	DED3		Leipzig	Boundary shift
129	2006-2010		DED5	Leipzig	New region	recalculation by NSI
130	2006-2010	GR11	EL11	Aνατολική Μακεδονία, Θράκη	Code change	EL11 = GR11
131	2006-2010	GR12	EL12	Κεντρική Μακεδονία	Code change	EL12 = GR12
132	2006-2010	GR13	EL13	Δυτική Μακεδονία	Code change	EL13 = GR13
133	2006-2010	GR14	EL14	Θεσσαλία	Code change	EL14 = GR14
134	2006-2010	GR21	EL21	Ήπειρος	Code change	EL21 = GR21
135	2006-2010	GR22	EL22	Ιόνια Νησιά	Code change	EL22 = GR22
136	2006-2010	GR23	EL23	Δυτική Ελλάδα	Code change	EL23 = GR23
137	2006-2010	GR24	EL24	Στερεά Ελλάδα	Code change	EL24 = GR24
138	2006-2010	GR25	EL25	Πελοπόννησος	Code change	EL25 = GR25
139	2006-2010	GR30	EL30	Aττική	Code change	EL30 = GR30
140	2006-2010	GR41	EL41	Βόρειο Αιγαίο	Code change	EL41 = GR41
141	2006-2010	GR42	EL42	Νότιο Αιγαίο	Code change	EL42 = GR42
142	2006-2010	GR43	EL43	Κρήτη	Code change	EL43 = GR43
143	2006-2010	GRZZ	ELZZ	Extra-Regio NUTS 2	Code change, label change	ELZZ = GRZZ
144	2006-2010	ITD1	ITH1	Provincia Autonoma di Bolzano/Bozen	Code change, label change	ITH1 = ITD1
145	2006-2010	ITD2	ITH2	Provincia Autonoma di Trento	Code change, label change	ITH2 = ITD2
146	2006-2010	ITD3	ITH3	Veneto	Code change	ITH3 = ITD3
147	2006-2010	ITD4	ITH4	Friuli-Venezia Giulia	Code change	ITH4 = ITD4
148	2006-2010	ITE4	ITI4	Lazio	Code change	ITI4 = ITE4
149	2006-2010	ITE1	ITI1	Toscana	Code change	ITI1 = ITE1
150	2006-2010	ITE2	ITI2	Umbria	Code change	ITI2 = ITE2
151	2006-2010	ITD5	ITH5	Emilia-Romagna	Code change	Actually a boundary shift, over-written
152	2006-2010	ITE3	ITI3	Marche	Code change	Actually a boundary shift, over-written
153	2006-2010	FI13	FI1D (part)	Itä-Suomi	Merged
154	2006-2010	FI1A	FI1D (part)	Pohjois-Suomi	Merged
155	2006-2010		FI1D	Pohjois- ja Itä-Suomi	New region	FI1D = FI13 + FI1A
156	2006-2010	FI18		Etelä-Suomi	Split
157	2006-2010	FI18 (part)	FI1B	Helsinki-Uusimaa	New region	FI1B + FI1C = FI18, recalculation by NSI
158	2006-2010	FI18 (part)	FI1C	Etelä-Suomi	New region	FI1B + FI1C = FI18, recalculation by NSI
159	2006-2010	UKD2		Cheshire	Boundary shift
160	2006-2010	UKD5		Merseyside	Boundary shift
161	2006-2010		UKD6	Cheshire	New region	recalculation by NSI
162	2006-2010		UKD7	Merseyside	New region	recalculation by NSI
163	2010-2013	EL11	EL51	Aνατολική Μακεδονία, Θράκη	Code change	EL51 = EL11
164	2010-2013	EL12	EL52	Κεντρική Μακεδονία	Code change	EL52 = EL12
165	2010-2013	EL13	EL53	Δυτική Μακεδονία	Code change	EL53 = EL13
166	2010-2013	EL21	EL54	Ήπειρος	Code change	EL54 = EL21
167	2010-2013	EL14	EL61	Θεσσαλία	Code change	EL61 = EL14
168	2010-2013	EL22	EL62	Ιόνια Νησιά	Code change	EL62 = EL22
169	2010-2013	EL23	EL63	Δυτική Ελλάδα	Code change	EL63 = EL23
170	2010-2013	EL24	EL64	Στερεά Ελλάδα	Code change	EL64 = EL24
171	2010-2013	EL25	EL65	Πελοπόννησος	Code change	EL65 = EL25
172	2010-2013	FR91		Guadeloupe	Boundary shift
173	2010-2013		FRA1	Guadeloupe	New region	recalculation by NSI
174	2010-2013	FR92	FRA2	Martinique	Code change	FRA2 = FR92
175	2010-2013	FR93	FRA3	Guyane	Code change	FRA3 = FR93
176	2010-2013	FR94	FRA4	La Réunion	Name change	FRA4 = FR94
177	2010-2013		FRA5	Mayotte	New region
178	2010-2013	PT17	PT17	Área Metropolitana de Lisboa	Name change	n.a.
179	2010-2013	SI01		Vzhodna Slovenija	Boundary shift
180	2010-2013		SI03	Vzhodna Slovenija	New region	recalculation by NSI
181	2010-2013	SI02		Zahodna Slovenija	Boundary shift
182	2010-2013		SI04	Zahodna Slovenija	New region	recalculation by NSI
183	2010-2013	UKI1		Inner London	Split
184	2010-2013	UKI1 (part)	UKI3	Inner London - West	New region	UKI3 + UKI4 = UKI1, recalculation by NSI
185	2010-2013	UKI1 (part)	UKI4	Inner London - East	New region	UKI3 + UKI4 = UKI1, recalculation by NSI
186	2010-2013	UKI2		Outer London	Split
187	2010-2013	UKI2 (part)	UKI5	Outer London - East and North East	New region	UKI5 + UKI6 + UKI7 = UKI2, recalculation by NSI
188	2010-2013	UKI2 (part)	UKI6	Outer London - South	New region	UKI5 + UKI6 + UKI7 = UKI2, recalculation by NSI
189	2010-2013	UKI2 (part)	UKI7	Outer London - West and North West	New region	UKI5 + UKI6 + UKI7 = UKI2, recalculation by NSI
190	2013-2016	IE01		Border, Midland and Western	discontinued
191	2013-2016		IE04	Northern and Western	new region
192	2013-2016	IE02		Southern and Eastern	discontinued
193	2013-2016		IE05	Southern	new region, made from ex-IE023, IE024 and IE025	IE05=IE023+IE024+IE025
194	2013-2016		IE06	Eastern and Midland	new region
195	2013-2016	FR24	FRB0	Centre — Val de Loire	recoded and relabelled	FRB0=FR24
196	2013-2016	FR26	FRC1	Bourgogne	recoded	FRC1=FR26
197	2013-2016	FR43	FRC2	Franche-Comté	recoded	FRC2=FR43
198	2013-2016	FR25	FRD1	Basse-Normandie	recoded	FRD1=FRFR25
199	2013-2016	FR23	FRD2	Haute-Normandie	recoded	FRD2=FR23
200	2013-2016	FR30	FRE1	Nord-Pas de Calais	recoded	FRE1=FR30
201	2013-2016	FR22	FRE2	Picardie	recoded	FRE2=FR22
202	2013-2016	FR42	FRF1	Alsace	recoded	FRF1=FR42
203	2013-2016	FR21	FRF2	Champagne-Ardenne	recoded	FRF2=FR21
204	2013-2016	FR41	FRF3	Lorraine	recoded	FRF3=FR41
205	2013-2016	FR51	FRG0	Pays de la Loire	recoded	FRG0=FR51
206	2013-2016	FR52	FRH0	Bretagne	recoded	FRH0=FR52
207	2013-2016	FR61	FRI1	Aquitaine	recoded	FRI1=FR61
208	2013-2016	FR63	FRI2	Limousin	recoded	FRI2=FR63
209	2013-2016	FR53	FRI3	Poitou-Charentes	recoded	FRI3=FR53
210	2013-2016	FR81	FRJ1	Languedoc-Roussillon	recoded	FRJ1=FR81
211	2013-2016	FR62	FRJ2	Midi-Pyrénées	recoded	FRJ2=FR62
212	2013-2016	FR72	FRK1	Auvergne	recoded	FRK1=FR72
213	2013-2016	FR71	FRK2	Rhône-Alpes	recoded	FRK2=FR71
214	2013-2016	FR82	FRL0	Provence-Alpes-Côte d’Azur	recoded	FRL0=FR82
215	2013-2016	FR83	FRM0	Corse	recoded	FRM0=FR83
216	2013-2016	FRA1	FRY1	Guadeloupe	recoded	FRY1=FRA1
217	2013-2016	FRA2	FRY2	Martinique	recoded	FRY2=FRA2
218	2013-2016	FRA3	FRY3	Guyane	recoded	FRY3=FRA3
219	2013-2016	FRA4	FRY4	La Réunion	recoded	FRY4=FRA4
220	2013-2016	FRA5	FRY5	Mayotte	recoded	FRY5=FRA5
221	2013-2016	LT00		Lietuva	split into new LT01 and LT02
222	2013-2016		LT01	Sostinės regionas	new region, equals ex-NUTS 3 region LT00A	LT01=LT00A
223	2013-2016		LT02	Vidurio ir vakarų Lietuvos regionas	new region, ex-LT00 minus ex-LT00A	LT02=LT00-LT00A
224	2013-2016	HU10		Közép-Magyarország	discontinued; split into new HU11 and HU12
225	2013-2016		HU11	Budapest	new region, equals ex-NUTS 3 region HU101	HU11=HU101
226	2013-2016		HU12	Pest	new region, equals ex-NUTS 3 region HU102	HU12=HU102
227	2013-2016	PL11	PL71	Łódzkie	recoded	PL71=PL11
228	2013-2016	PL33	PL72	Świętokrzyskie	recoded	PL72=PL33
229	2013-2016	PL31	PL81	Lubelskie	recoded	PL81=PL31
230	2013-2016	PL32	PL82	Podkarpackie	recoded	PL82=PL32
231	2013-2016	PL34	PL84	Podlaskie	recoded	PL84=PL34
232	2013-2016	PL12		Mazowieckie	discontinued; split into new PL91 and PL92
233	2013-2016		PL91	Warszawski stołeczny	new region, equals ex-PL127, PL129 and PL12A minus new PL926	PL91=PL127+PL129+PL12A-newPL926
234	2013-2016		PL92	Mazowiecki regionalny	new region, made from ex-PL128, PL12B, PL12C, PL12D, PL12E plus new PL926	PL92=PL128+PL12B+PL12C+PL12D+PL12E+new PL926
235	2013-2016	UKM2	UKM7	Eastern Scotland	boundary shift; lost ex-UKM24	UKM7=UKM2-UKM24
236	2013-2016	UKM3		South Western Scotland	discontinued; split into new UKM8 and UKM9
237	2013-2016		UKM8	West Central Scotland	new region, made from ex-UKM31, UKM34, UKM35 and UKM36	UKM8=UKM31+UKM34+UKM35+UKM36
238	2013-2016		UKM9	Southern Scotland	new region, made from ex-UKM24, UKM32, UKM33, UKM37 and UKM38	UKM9=UKM24+UKM32+UKM33+UKM37+UKM38
239	2016-2021	ES52	ES52	Comunitat Valenciana	name change
240	2016-2021	ES63	ES63	Ciudad de Ceuta	name change
241	2016-2021	ES64	ES64	Ciudad de Melilla	name change
242	2016-2021	HR04		Kontinentalna Hrvatska	discontinued; split into new HR02, HR05 and HR06
243	2016-2021		HR05	Grad Zagreb	new	HR05 = HR041
244	2016-2021		HR06	Sjeverna Hrvatska	new	HR06 = HR046 + HR044 + HR045 + HR043 + HR042
245	2016-2021		HR02	Panonska Hrvatska	new	HR02 = HR047 + HR048 + HR049 + HR04A + HR04B + HR04C + HR04D + HR04E
246	2016-2021	NO01		Oslo og Akershus	discontinued
247	2016-2021		NO08	Oslo og Viken	new
248	2016-2021	NO02	NO02	Innlandet	renamed
249	2016-2021		NO09	Agder og Sør-Østlandet	new
250	2016-2021	NO05	NO0A	Vestlandet	recoded (boundary change)
251	2016-2021	NO03		Sør-Østlandet	discontinued
252	2016-2021	NO04		Agder og Rogaland	discontinued
253	2016-2021		NO0B	Jan Mayen and Svalbard	new

## Sheet: Note
New region
Split
Merged
Boundary shift
Name change
discontinued
new region, made from ex-IE023, IE024 and IE025
split into new LT01 and LT02
new region, equals ex-NUTS 3 region LT00A
new region, ex-LT00 minus ex-LT00A
discontinued; split into new HU11 and HU12
new region, equals ex-NUTS 3 region HU101
new region, equals ex-NUTS 3 region HU102
discontinued; split into new PL91 and PL92
new region, equals ex-PL127, PL129 and PL12A minus new PL926
new region, made from ex-PL128, PL12B, PL12C, PL12D, PL12E plus new PL926
boundary shift; lost ex-UKM24
discontinued; split into new UKM8 and UKM9
new region, made from ex-UKM31, UKM34, UKM35 and UKM36
new region, made from ex-UKM24, UKM32, UKM33, UKM37 and UKM38
discontinued; split into new HR02, HR05 and HR06
new
renamed
Manual: copy All, cut out easy replacements, manually do old and new columns
changelist = ["code change","recoded","code change, name changes","code change, label change","recoded and relabelled","recoded (boundary change)","name change","renamed"]
Drop extra regio
There should be a way to automate, but faster to just do it by hand
All splits -> back-fill with parent
All boundary change -> fill with same-name region
Index	Period	Code_OLD	Code_NEW	Label	Change	Explanation
48	1999-2003	PT12	PT16 (part)	Centro (P)	Merged
49	1999-2003		PT16	Centro (P)	New region
50	1999-2003	PT13		Lisboa e Vale do Tejo	Split
51	1999-2003		PT17	Lisboa	New region
52	1999-2003	PT14	PT18 (part)	Alentejo	Merged
53	1999-2003		PT18	Alentejo	New region
54	1999-2003	FI16	FI18 (part)	Uusimaa	Merged
55	1999-2003		FI18	Etelä-Suomi	New region
56	1999-2003	FI17		Etelä-Suomi	Split
57	1999-2003		FI19	Länsi-Suomi	New region
58	1999-2003	FI14		Väli-Suomi	Split
59	1999-2003	FI15	FI1A (part)	Pohjois-Suomi	Merged
60	1999-2003		FI1A	Pohjois-Suomi	New region
61	2003-2006	DEE1	DEE0 (part)	Dessau	Merged
62	2003-2006	DEE2	DEE0 (part)	Halle	Merged
63	2003-2006	DEE3	DEE0 (part)	Magdeburg	Merged
64	2003-2006		DEE0	Sachsen-Anhalt	New region
65	2006-2010	DE41	DE40 (part)	Brandenburg - Nordost	Merged
66	2006-2010	DE42	DE40 (part)	Brandenburg - Südwest	Merged
67	2006-2010		DE40	Brandenburg	New region	DE40 = DE41 + DE42
68	2006-2010	FI13	FI1D (part)	Itä-Suomi	Merged
69	2006-2010	FI1A	FI1D (part)	Pohjois-Suomi	Merged
70	2006-2010		FI1D	Pohjois- ja Itä-Suomi	New region	FI1D = FI13 + FI1A
71	2010-2013		FRA5	Mayotte	New region
72	2013-2016	IE01		Border, Midland and Western	discontinued
73	2013-2016		IE04	Northern and Western	new region
74	2013-2016	IE02		Southern and Eastern	discontinued
75	2013-2016		IE05	Southern	new region, made from ex-IE023, IE024 and IE025	IE05=IE023+IE024+IE025
76	2013-2016		IE06	Eastern and Midland	new region
77	2016-2021	NO03		Sør-Østlandet	discontinued
78	2016-2021	NO04		Agder og Rogaland	discontinued
79	2016-2021		NO0B	Jan Mayen and Svalbard	new

## Sheet: ManualRaw
Index	Period	Code_OLD	Code_NEW	Label	Change	Explanation
0	1999-2003	DE4		Brandenburg	Split
1	1999-2003	DE4 (part)	DE41	Brandenburg - Nordost	New region
2	1999-2003	DE4 (part)	DE42	Brandenburg - Südwest	New region
3	1999-2003	ES63		Ceuta y Melilla	Split
4	1999-2003	ES63 (part)	ES63	Ciudad Autónoma de Ceuta	New region
5	1999-2003	ES63 (part)	ES64	Ciudad Autónoma de Melilla	New region
6	1999-2003	IT31		Trentino-Alto Adige	Split
7	1999-2003	IT31 (part)	ITD1	Provincia Autonoma Bolzano/Bozen	New region
8	1999-2003	IT31 (part)	ITD2	Provincia Autonoma Trento	New region
9	1999-2003	PT12	PT16 (part)	Centro (P)	Merged
10	1999-2003		PT16	Centro (P)	New region
11	1999-2003	PT13		Lisboa e Vale do Tejo	Split
12	1999-2003		PT17	Lisboa	New region
13	1999-2003	PT14	PT18 (part)	Alentejo	Merged
14	1999-2003		PT18	Alentejo	New region
15	1999-2003	FI16	FI18 (part)	Uusimaa	Merged
16	1999-2003		FI18	Etelä-Suomi	New region
17	1999-2003	FI17		Etelä-Suomi	Split
18	1999-2003		FI19	Länsi-Suomi	New region
19	1999-2003	FI14		Väli-Suomi	Split
20	1999-2003	FI15	FI1A (part)	Pohjois-Suomi	Merged
21	1999-2003		FI1A	Pohjois-Suomi	New region
22	2003-2006	BG11		Северозападен	Boundary shift
23	2003-2006		BG31	Северозападен	New region
24	2003-2006	BG12		Северен централен	Boundary shift
25	2003-2006		BG32	Северен централен	New region
26	2003-2006	BG13		Североизточен	Boundary shift
27	2003-2006		BG33	Североизточен	New region
28	2003-2006		BG34	Югоизточен	New region
29	2003-2006	BG23		Югозападен	Boundary shift
30	2003-2006	BG22		Южен централен	Boundary shift
31	2003-2006		BG42	Южен централен	New region
32	2003-2006	DK00		Danmark	Split
33	2003-2006	DK00 (part)	DK01	Hovedstaden	New region
34	2003-2006	DK00 (part)	DK02	Sjælland	New region
35	2003-2006	DK00 (part)	DK03	Syddanmark	New region
36	2003-2006	DK00 (part)	DK04	Midtjylland	New region
37	2003-2006	DK00 (part)	DK05	Nordjylland	New region
38	2003-2006	DEE1	DEE0 (part)	Dessau	Merged
39	2003-2006	DEE2	DEE0 (part)	Halle	Merged
40	2003-2006	DEE3	DEE0 (part)	Magdeburg	Merged
41	2003-2006		DEE0	Sachsen-Anhalt	New region
42	2003-2006	SI00		Slovenija	Split
43	2003-2006	SI00 (part)	SI01	Vzhodna Slovenija	New region
44	2003-2006	SI00 (part)	SI02	Zahodna Slovenija	New region
45	2003-2006	UKM1		North Eastern Scotland	Boundary shift
46	2003-2006		UKM5	North Eastern Scotland	New region
47	2003-2006	UKM4		Highlands and Islands	Boundary shift
48	2003-2006		UKM6	Highlands and Islands	New region
49	2006-2010	DE41	DE40 (part)	Brandenburg - Nordost	Merged
50	2006-2010	DE42	DE40 (part)	Brandenburg - Südwest	Merged
51	2006-2010		DE40	Brandenburg	New region	DE40 = DE41 + DE42
52	2006-2010	DED1		Chemnitz	Boundary shift
53	2006-2010		DED4	Chemnitz	New region	recalculation by NSI
54	2006-2010	DED3		Leipzig	Boundary shift
55	2006-2010		DED5	Leipzig	New region	recalculation by NSI
56	2006-2010	ITD5		Emilia-Romagna	Boundary shift
57	2006-2010		ITH5	Emilia-Romagna	New region	recalculation by NSI
58	2006-2010	ITE3		Marche	Boundary shift
59	2006-2010		ITI3	Marche	New region	recalculation by NSI
60	2006-2010	FI13	FI1D (part)	Itä-Suomi	Merged
61	2006-2010	FI1A	FI1D (part)	Pohjois-Suomi	Merged
62	2006-2010		FI1D	Pohjois- ja Itä-Suomi	New region	FI1D = FI13 + FI1A
63	2006-2010	FI18		Etelä-Suomi	Split
64	2006-2010	FI18 (part)	FI1B	Helsinki-Uusimaa	New region	FI1B + FI1C = FI18, recalculation by NSI
65	2006-2010	FI18 (part)	FI1C	Etelä-Suomi	New region	FI1B + FI1C = FI18, recalculation by NSI
66	2006-2010	UKD2		Cheshire	Boundary shift
67	2006-2010	UKD5		Merseyside	Boundary shift
68	2006-2010		UKD6	Cheshire	New region	recalculation by NSI
69	2006-2010		UKD7	Merseyside	New region	recalculation by NSI
70	2010-2013	FR91		Guadeloupe	Boundary shift
71	2010-2013		FRA1	Guadeloupe	New region	recalculation by NSI
72	2010-2013		FRA5	Mayotte	New region
73	2010-2013	SI01		Vzhodna Slovenija	Boundary shift
74	2010-2013		SI03	Vzhodna Slovenija	New region	recalculation by NSI
75	2010-2013	SI02		Zahodna Slovenija	Boundary shift
76	2010-2013		SI04	Zahodna Slovenija	New region	recalculation by NSI
77	2010-2013	UKI1		Inner London	Split
78	2010-2013	UKI1 (part)	UKI3	Inner London - West	New region	UKI3 + UKI4 = UKI1, recalculation by NSI
79	2010-2013	UKI1 (part)	UKI4	Inner London - East	New region	UKI3 + UKI4 = UKI1, recalculation by NSI
80	2010-2013	UKI2		Outer London	Split
81	2010-2013	UKI2 (part)	UKI5	Outer London - East and North East	New region	UKI5 + UKI6 + UKI7 = UKI2, recalculation by NSI
82	2010-2013	UKI2 (part)	UKI6	Outer London - South	New region	UKI5 + UKI6 + UKI7 = UKI2, recalculation by NSI
83	2010-2013	UKI2 (part)	UKI7	Outer London - West and North West	New region	UKI5 + UKI6 + UKI7 = UKI2, recalculation by NSI
84	2013-2016	IE01		Border, Midland and Western	discontinued
85	2013-2016		IE04	Northern and Western	new region
86	2013-2016	IE02		Southern and Eastern	discontinued
87	2013-2016		IE05	Southern	new region, made from ex-IE023, IE024 and IE025	IE05=IE023+IE024+IE025
88	2013-2016		IE06	Eastern and Midland	new region
89	2013-2016	LT00		Lietuva	split into new LT01 and LT02
90	2013-2016		LT01	Sostinės regionas	new region, equals ex-NUTS 3 region LT00A	LT01=LT00A
91	2013-2016		LT02	Vidurio ir vakarų Lietuvos regionas	new region, ex-LT00 minus ex-LT00A	LT02=LT00-LT00A
92	2013-2016	HU10		Közép-Magyarország	discontinued; split into new HU11 and HU12
93	2013-2016		HU11	Budapest	new region, equals ex-NUTS 3 region HU101	HU11=HU101
94	2013-2016		HU12	Pest	new region, equals ex-NUTS 3 region HU102	HU12=HU102
95	2013-2016	PL12		Mazowieckie	discontinued; split into new PL91 and PL92
96	2013-2016		PL91	Warszawski stołeczny	new region, equals ex-PL127, PL129 and PL12A minus new PL926	PL91=PL127+PL129+PL12A-newPL926
97	2013-2016		PL92	Mazowiecki regionalny	new region, made from ex-PL128, PL12B, PL12C, PL12D, PL12E plus new PL926	PL92=PL128+PL12B+PL12C+PL12D+PL12E+new PL926
98	2013-2016	UKM2	UKM7	Eastern Scotland	boundary shift; lost ex-UKM24	UKM7=UKM2-UKM24
99	2013-2016	UKM3		South Western Scotland	discontinued; split into new UKM8 and UKM9
100	2013-2016		UKM8	West Central Scotland	new region, made from ex-UKM31, UKM34, UKM35 and UKM36	UKM8=UKM31+UKM34+UKM35+UKM36
101	2013-2016		UKM9	Southern Scotland	new region, made from ex-UKM24, UKM32, UKM33, UKM37 and UKM38	UKM9=UKM24+UKM32+UKM33+UKM37+UKM38
102	2016-2021	HR04		Kontinentalna Hrvatska	discontinued; split into new HR02, HR05 and HR06
103	2016-2021		HR05	Grad Zagreb	new	HR05 = HR041
104	2016-2021		HR06	Sjeverna Hrvatska	new	HR06 = HR046 + HR044 + HR045 + HR043 + HR042
105	2016-2021		HR02	Panonska Hrvatska	new	HR02 = HR047 + HR048 + HR049 + HR04A + HR04B + HR04C + HR04D + HR04E
106	2016-2021	NO01		Oslo og Akershus	discontinued
107	2016-2021		NO08	Oslo og Viken	new
108	2016-2021		NO09	Agder og Sør-Østlandet	new
109	2016-2021	NO03		Sør-Østlandet	discontinued
110	2016-2021	NO04		Agder og Rogaland	discontinued
111	2016-2021		NO0B	Jan Mayen and Svalbard	new

## Sheet: YieldMerge
Index	Period	Code_OLD	Code_NEW	Label	Change	Explanation
0	1999-2003	DE4	DE41	Brandenburg - Nordost	New region
1	1999-2003	DE4	DE42	Brandenburg - Südwest	New region
2	1999-2003	ES63	ES64	Ciudad Autónoma de Melilla	New region
3	1999-2003	IT31	ITD1	Provincia Autonoma Bolzano/Bozen	New region
4	1999-2003	IT31	ITD2	Provincia Autonoma Trento	New region
5	2003-2006	BG11	BG31	Северозападен	Boundary shift
6	2003-2006	BG12	BG32	Северен централен	Boundary shift
7	2003-2006	BG13	BG33	Североизточен	Boundary shift
8	2003-2006	BG23	BG34	Югозападен	Boundary shift
9	2003-2006	BG22	BG42	Южен централен	Boundary shift
10	2003-2006	DK00	DK01	Hovedstaden	New region
11	2003-2006	DK00	DK02	Sjælland	New region
12	2003-2006	DK00	DK03	Syddanmark	New region
13	2003-2006	DK00	DK04	Midtjylland	New region
14	2003-2006	DK00	DK05	Nordjylland	New region
15	2003-2006	SI00	SI01	Vzhodna Slovenija	New region
16	2003-2006	SI00	SI02	Zahodna Slovenija	New region
17	2003-2006	UKM1	UKM5	North Eastern Scotland	Boundary shift
18	2003-2006	UKM4	UKM6	Highlands and Islands	Boundary shift
19	2006-2010	DED1	DED4	Chemnitz	Boundary shift	recalculation by NSI
20	2006-2010	DED3	DED5	Leipzig	Boundary shift	recalculation by NSI
21	2006-2010	ITD5	ITH5	Emilia-Romagna	Boundary shift	recalculation by NSI
22	2006-2010	ITE3	ITI3	Marche	Boundary shift	recalculation by NSI
23	2006-2010	FI18	FI1B	Helsinki-Uusimaa	New region	FI1B + FI1C = FI18, recalculation by NSI
24	2006-2010	FI18	FI1C	Etelä-Suomi	New region	FI1B + FI1C = FI18, recalculation by NSI
25	2006-2010	UKD2	UKD6	Cheshire	Boundary shift
26	2006-2010	UKD5	UKD7	Merseyside	Boundary shift
27	2010-2013	FR91	FRA1	Guadeloupe	Boundary shift
28	2010-2013	SI01	SI03	Vzhodna Slovenija	Boundary shift	recalculation by NSI
29	2010-2013	SI02	SI04	Zahodna Slovenija	Boundary shift	recalculation by NSI
30	2010-2013	UKI1	UKI3	Inner London - West	New region	UKI3 + UKI4 = UKI1, recalculation by NSI
31	2010-2013	UKI1	UKI4	Inner London - East	New region	UKI3 + UKI4 = UKI1, recalculation by NSI
32	2010-2013	UKI2	UKI5	Outer London - East and North East	New region	UKI5 + UKI6 + UKI7 = UKI2, recalculation by NSI
33	2010-2013	UKI2	UKI6	Outer London - South	New region	UKI5 + UKI6 + UKI7 = UKI2, recalculation by NSI
34	2010-2013	UKI2	UKI7	Outer London - West and North West	New region	UKI5 + UKI6 + UKI7 = UKI2, recalculation by NSI
35	2013-2016	LT00	LT01	Sostinės regionas	New region	LT01=LT00A
36	2013-2016	LT00	LT02	Vidurio ir vakarų Lietuvos regionas	New region	LT02=LT00-LT00A
37	2013-2016	HU10	HU11	Budapest	New region	HU11=HU101
38	2013-2016	HU10	HU12	Pest	New region	HU12=HU102
39	2013-2016	PL12	PL91	Warszawski stołeczny	New region	PL91=PL127+PL129+PL12A-newPL926
40	2013-2016	PL12	PL92	Mazowiecki regionalny	New region	PL92=PL128+PL12B+PL12C+PL12D+PL12E+new PL926
41	2013-2016	UKM2	UKM7	Eastern Scotland	Boundary shift	UKM7=UKM2-UKM24
42	2013-2016	UKM3	UKM8	West Central Scotland	New region	UKM8=UKM31+UKM34+UKM35+UKM36
43	2013-2016	UKM3	UKM9	Southern Scotland	New region	UKM9=UKM24+UKM32+UKM33+UKM37+UKM38
44	2016-2021	HR04	HR05	Grad Zagreb	New region	HR05 = HR041
45	2016-2021	HR04	HR06	Sjeverna Hrvatska	New region	HR06 = HR046 + HR044 + HR045 + HR043 + HR042
46	2016-2021	HR04	HR02	Panonska Hrvatska	New region	HR02 = HR047 + HR048 + HR049 + HR04A + HR04B + HR04C + HR04D + HR04E
47	2016-2021	NO01	NO08	Oslo og Viken	New region
48	2016-2021	NO01	NO09	Agder og Sør-Østlandet	New region
