# Supplementary material
Source: MDPI journal article supplement (https://www.mdpi.com/2076-3417/13/10/6349)
Supplement: s1 [file s1 › DataProcessing/NUTS2021.xlsx]

## Sheet: Version Date
Version	Date	Change log
1.0	28.10.2019	Original
1.1	28.11.2019	Changes in Norway added
1.2	24.03.2020	Jan Mayen and Svalbard in Norway added
1.3	19.08.2020	Typologies added
1.4	25.09.2020	Minor corrections (country order of TR extra regios, spelling, few items moved to correct column)
1.5	10.02.2021	Minor corrections
1.6	09.03.2021	Correction: typing error on tab 'Changes NUTS-3' (code NO023 changed to NO020)
1.7	17.03.2021	Correction: description of NUTS changes in Italian region Sardinia (ITG2) (on tabs: 'Changes detailed NUTS 2016-2021' and 'Changes NUTS-3')
1.8	26.03.2021	Explanation on 'recode' changes of 3 HR NUTS-2 regions and 11 HR, 7 UK and 3 NO NUTS-3 regions added on tabs: 'Changes NUTS-2' and 'Changes NUTS-3'
1.9	20.05.2021	Adding tabs: 'Mountain regions', 'Border regions', 'Island regions' and 'Urban-rural remoteness'; Adding Metro labels to the tab "Metropolitan"

## Sheet: NUTS & SR 2021
Code 2021	Country	NUTS level 1	NUTS level 2	NUTS level 3	NUTS level	Country order	Region order
BE	Belgique/België				0	1	1
BE1		Région de Bruxelles-Capitale/Brussels Hoofdstedelijk Gewest			1	1	2
BE10			Région de Bruxelles-Capitale/ Brussels Hoofdstedelijk Gewest		2	1	3
BE100				Arr. de Bruxelles-Capitale/Arr. Brussel-Hoofdstad	3	1	4
BE2		Vlaams Gewest			1	1	5
BE21			Prov. Antwerpen		2	1	6
BE211				Arr. Antwerpen	3	1	7
BE212				Arr. Mechelen	3	1	8
BE213				Arr. Turnhout	3	1	9
BE22			Prov. Limburg (BE)		2	1	10
BE223				Arr. Tongeren	3	1	11
BE224				Arr. Hasselt	3	1	12
BE225				Arr. Maaseik	3	1	13
BE23			Prov. Oost-Vlaanderen		2	1	14
BE231				Arr. Aalst	3	1	15
BE232				Arr. Dendermonde	3	1	16
BE233				Arr. Eeklo	3	1	17
BE234				Arr. Gent	3	1	18
BE235				Arr. Oudenaarde	3	1	19
BE236				Arr. Sint-Niklaas	3	1	20
BE24			Prov. Vlaams-Brabant		2	1	21
BE241				Arr. Halle-Vilvoorde	3	1	22
BE242				Arr. Leuven	3	1	23
BE25			Prov. West-Vlaanderen		2	1	24
BE251				Arr. Brugge	3	1	25
BE252				Arr. Diksmuide	3	1	26
BE253				Arr. Ieper	3	1	27
BE254				Arr. Kortrijk	3	1	28
BE255				Arr. Oostende	3	1	29
BE256				Arr. Roeselare	3	1	30
BE257				Arr. Tielt	3	1	31
BE258				Arr. Veurne	3	1	32
BE3		Région wallonne			1	1	33
BE31			Prov. Brabant Wallon		2	1	34
BE310				Arr. Nivelles	3	1	35
BE32			Prov. Hainaut		2	1	36
BE323				Arr. Mons	3	1	37
BE328				Arr. Tournai-Mouscron	3	1	38
BE329				Arr. La Louvière	3	1	39
BE32A				Arr. Ath	3	1	40
BE32B				Arr. Charleroi	3	1	41
BE32C				Arr. Soignies	3	1	42
BE32D				Arr. Thuin	3	1	43
BE33			Prov. Liège		2	1	44
BE331				Arr. Huy	3	1	45
BE332				Arr. Liège	3	1	46
BE334				Arr. Waremme	3	1	47
BE335				Arr. Verviers — communes francophones	3	1	48
BE336				Bezirk Verviers — Deutschsprachige Gemeinschaft	3	1	49
BE34			Prov. Luxembourg (BE)		2	1	50
BE341				Arr. Arlon	3	1	51
BE342				Arr. Bastogne	3	1	52
BE343				Arr. Marche-en-Famenne	3	1	53
BE344				Arr. Neufchâteau	3	1	54
BE345				Arr. Virton	3	1	55
BE35			Prov. Namur		2	1	56
BE351				Arr. Dinant	3	1	57
BE352				Arr. Namur	3	1	58
BE353				Arr. Philippeville	3	1	59
BEZ		Extra-Regio NUTS 1			1	1	60
BEZZ			Extra-Regio NUTS 2		2	1	61
BEZZZ				Extra-Regio NUTS 3	3	1	62
BG	България				0	2	63		BG	Bulgaria
BG3		Северна и Югоизточна България			1	2	64		BG3	Severna i Yugoiztochna Bulgaria
BG31			Северозападен		2	2	65		BG31		Severozapaden
BG311				Видин	3	2	66		BG311			Vidin
BG312				Монтана	3	2	67		BG312			Montana
BG313				Враца	3	2	68		BG313			Vratsa
BG314				Плевен	3	2	69		BG314			Pleven
BG315				Ловеч	3	2	70		BG315			Lovech
BG32			Северен централен		2	2	71		BG32		Severen tsentralen
BG321				Велико Търново	3	2	72		BG321			Veliko Tarnovo
BG322				Габрово	3	2	73		BG322			Gabrovo
BG323				Русе	3	2	74		BG323			Ruse
BG324				Разград	3	2	75		BG324			Razgrad
BG325				Силистра	3	2	76		BG325			Silistra
BG33			Североизточен		2	2	77		BG33		Severoiztochen
BG331				Варна	3	2	78		BG331			Varna
BG332				Добрич	3	2	79		BG332			Dobrich
BG333				Шумен	3	2	80		BG333			Shumen
BG334				Търговище	3	2	81		BG334			Targovishte
BG34			Югоизточен		2	2	82		BG34		Yugoiztochen
BG341				Бургас	3	2	83		BG341			Burgas
BG342				Сливен	3	2	84		BG342			Sliven
BG343				Ямбол	3	2	85		BG343			Yambol
BG344				Стара Загора	3	2	86		BG344			Stara Zagora
BG4		Югозападна и Южна централна България			1	2	87		BG4	Yugozapadna i Yuzhna tsentralna Bulgaria
BG41			Югозападен		2	2	88		BG41		Yugozapaden
BG411				София (столица)	3	2	89		BG411			Sofia (stolitsa)
BG412				София	3	2	90		BG412			Sofia
BG413				Благоевград	3	2	91		BG413			Blagoevgrad
BG414				Перник	3	2	92		BG414			Pernik
BG415				Кюстендил	3	2	93		BG415			Kyustendil
BG42			Южен централен		2	2	94		BG42		Yuzhen tsentralen
BG421				Пловдив	3	2	95		BG421			Plovdiv
BG422				Хасково	3	2	96		BG422			Haskovo
BG423				Пазарджик	3	2	97		BG423			Pazardzhik
BG424				Смолян	3	2	98		BG424			Smolyan
BG425				Кърджали	3	2	99		BG425			Kardzhali
BGZ		Extra-Regio NUTS 1			1	2	100		BGZ	Extra-Regio NUTS 1
BGZZ			Extra-Regio NUTS 2		2	2	101		BGZZ		Extra-Regio NUTS 2
BGZZZ				Extra-Regio NUTS 3	3	2	102		BGZZZ			Extra-Regio NUTS 3
CZ	Česko				0	3	103
CZ0		Česko			1	3	104		The version in Latin characters is not official. It is included here only for the sake of comprehension.
CZ01			Praha		2	3	105
CZ010				Hlavní město Praha	3	3	106
CZ02			Střední Čechy		2	3	107
CZ020				Středočeský kraj	3	3	108
CZ03			Jihozápad		2	3	109
CZ031				Jihočeský kraj	3	3	110
CZ032				Plzeňský kraj	3	3	111
CZ04			Severozápad		2	3	112
CZ041				Karlovarský kraj	3	3	113
CZ042				Ústecký kraj	3	3	114
CZ05			Severovýchod		2	3	115
CZ051				Liberecký kraj	3	3	116
CZ052				Královéhradecký kraj	3	3	117
CZ053				Pardubický kraj	3	3	118
CZ06			Jihovýchod		2	3	119
CZ063				Kraj Vysočina	3	3	120
CZ064				Jihomoravský kraj	3	3	121
CZ07			Střední Morava		2	3	122
CZ071				Olomoucký kraj	3	3	123
CZ072				Zlínský kraj	3	3	124
CZ08			Moravskoslezsko		2	3	125
CZ080				Moravskoslezský kraj	3	3	126
CZZ		Extra-Regio NUTS 1			1	3	127
CZZZ			Extra-Regio NUTS 2		2	3	128
CZZZZ				Extra-Regio NUTS 3	3	3	129
DK	Danmark				0	4	130
DK0		Danmark			1	4	131
DK01			Hovedstaden		2	4	132
DK011				Byen København	3	4	133
DK012				Københavns omegn	3	4	134
DK013				Nordsjælland	3	4	135
DK014				Bornholm	3	4	136
DK02			Sjælland		2	4	137
DK021				Østsjælland	3	4	138
DK022				Vest- og Sydsjælland	3	4	139
DK03			Syddanmark		2	4	140
DK031				Fyn	3	4	141
DK032				Sydjylland	3	4	142
DK04			Midtjylland		2	4	143
DK041				Vestjylland	3	4	144
DK042				Østjylland	3	4	145
DK05			Nordjylland		2	4	146
DK050				Nordjylland	3	4	147
DKZ		Extra-Regio NUTS 1			1	4	148
DKZZ			Extra-Regio NUTS 2		2	4	149
DKZZZ				Extra-Regio NUTS 3	3	4	150
DE	Deutschland				0	5	151
DE1		Baden-Württemberg			1	5	152
DE11			Stuttgart		2	5	153
DE111				Stuttgart, Stadtkreis	3	5	154
DE112				Böblingen	3	5	155
DE113				Esslingen	3	5	156
DE114				Göppingen	3	5	157
DE115				Ludwigsburg	3	5	158
DE116				Rems-Murr-Kreis	3	5	159
DE117				Heilbronn, Stadtkreis	3	5	160
DE118				Heilbronn, Landkreis	3	5	161
DE119				Hohenlohekreis	3	5	162
DE11A				Schwäbisch Hall	3	5	163
DE11B				Main-Tauber-Kreis	3	5	164
DE11C				Heidenheim	3	5	165
DE11D				Ostalbkreis	3	5	166
DE12			Karlsruhe		2	5	167
DE121				Baden-Baden, Stadtkreis	3	5	168
DE122				Karlsruhe, Stadtkreis	3	5	169
DE123				Karlsruhe, Landkreis	3	5	170
DE124				Rastatt	3	5	171
DE125				Heidelberg, Stadtkreis	3	5	172
DE126				Mannheim, Stadtkreis	3	5	173
DE127				Neckar-Odenwald-Kreis	3	5	174
DE128				Rhein-Neckar-Kreis	3	5	175
DE129				Pforzheim, Stadtkreis	3	5	176
DE12A				Calw	3	5	177
DE12B				Enzkreis	3	5	178
DE12C				Freudenstadt	3	5	179
DE13			Freiburg		2	5	180
DE131				Freiburg im Breisgau, Stadtkreis	3	5	181
DE132				Breisgau-Hochschwarzwald	3	5	182
DE133				Emmendingen	3	5	183
DE134				Ortenaukreis	3	5	184
DE135				Rottweil	3	5	185
DE136				Schwarzwald-Baar-Kreis	3	5	186
DE137				Tuttlingen	3	5	187
DE138				Konstanz	3	5	188
DE139				Lörrach	3	5	189
DE13A				Waldshut	3	5	190
DE14			Tübingen		2	5	191
DE141				Reutlingen	3	5	192
DE142				Tübingen, Landkreis	3	5	193
DE143				Zollernalbkreis	3	5	194
DE144				Ulm, Stadtkreis	3	5	195
DE145				Alb-Donau-Kreis	3	5	196
DE146				Biberach	3	5	197
DE147				Bodenseekreis	3	5	198
DE148				Ravensburg	3	5	199
DE149				Sigmaringen	3	5	200
DE2		Bayern			1	5	201
DE21			Oberbayern		2	5	202
DE211				Ingolstadt, Kreisfreie Stadt	3	5	203
DE212				München, Kreisfreie Stadt	3	5	204
DE213				Rosenheim, Kreisfreie Stadt	3	5	205
DE214				Altötting	3	5	206
DE215				Berchtesgadener Land	3	5	207
DE216				Bad Tölz-Wolfratshausen	3	5	208
DE217				Dachau	3	5	209
DE218				Ebersberg	3	5	210
DE219				Eichstätt	3	5	211
DE21A				Erding	3	5	212
DE21B				Freising	3	5	213
DE21C				Fürstenfeldbruck	3	5	214
DE21D				Garmisch-Partenkirchen	3	5	215
DE21E				Landsberg am Lech	3	5	216
DE21F				Miesbach	3	5	217
DE21G				Mühldorf a. Inn	3	5	218
DE21H				München, Landkreis	3	5	219
DE21I				Neuburg-Schrobenhausen	3	5	220
DE21J				Pfaffenhofen a. d. Ilm	3	5	221
DE21K				Rosenheim, Landkreis	3	5	222
DE21L				Starnberg	3	5	223
DE21M				Traunstein	3	5	224
DE21N				Weilheim-Schongau	3	5	225
DE22			Niederbayern		2	5	226
DE221				Landshut, Kreisfreie Stadt	3	5	227
DE222				Passau, Kreisfreie Stadt	3	5	228
DE223				Straubing, Kreisfreie Stadt	3	5	229
DE224				Deggendorf	3	5	230
DE225				Freyung-Grafenau	3	5	231
DE226				Kelheim	3	5	232
DE227				Landshut, Landkreis	3	5	233
DE228				Passau, Landkreis	3	5	234
DE229				Regen	3	5	235
DE22A				Rottal-Inn	3	5	236
DE22B				Straubing-Bogen	3	5	237
DE22C				Dingolfing-Landau	3	5	238
DE23			Oberpfalz		2	5	239
DE231				Amberg, Kreisfreie Stadt	3	5	240
DE232				Regensburg, Kreisfreie Stadt	3	5	241
DE233				Weiden i. d. Opf, Kreisfreie Stadt	3	5	242
DE234				Amberg-Sulzbach	3	5	243
DE235				Cham	3	5	244
DE236				Neumarkt i. d. OPf.	3	5	245
DE237				Neustadt a. d. Waldnaab	3	5	246
DE238				Regensburg, Landkreis	3	5	247
DE239				Schwandorf	3	5	248
DE23A				Tirschenreuth	3	5	249
DE24			Oberfranken		2	5	250
DE241				Bamberg, Kreisfreie Stadt	3	5	251
DE242				Bayreuth, Kreisfreie Stadt	3	5	252
DE243				Coburg, Kreisfreie Stadt	3	5	253
DE244				Hof, Kreisfreie Stadt	3	5	254
DE245				Bamberg, Landkreis	3	5	255
DE246				Bayreuth, Landkreis	3	5	256
DE247				Coburg, Landkreis	3	5	257
DE248				Forchheim	3	5	258
DE249				Hof, Landkreis	3	5	259
DE24A				Kronach	3	5	260
DE24B				Kulmbach	3	5	261
DE24C				Lichtenfels	3	5	262
DE24D				Wunsiedel i. Fichtelgebirge	3	5	263
DE25			Mittelfranken		2	5	264
DE251				Ansbach, Kreisfreie Stadt	3	5	265
DE252				Erlangen, Kreisfreie Stadt	3	5	266
DE253				Fürth, Kreisfreie Stadt	3	5	267
DE254				Nürnberg, Kreisfreie Stadt	3	5	268
DE255				Schwabach, Kreisfreie Stadt	3	5	269
DE256				Ansbach, Landkreis	3	5	270
DE257				Erlangen-Höchstadt	3	5	271
DE258				Fürth, Landkreis	3	5	272
DE259				Nürnberger Land	3	5	273
DE25A				Neustadt a. d. Aisch-Bad Windsheim	3	5	274
DE25B				Roth	3	5	275
DE25C				Weißenburg-Gunzenhausen	3	5	276
DE26			Unterfranken		2	5	277
DE261				Aschaffenburg, Kreisfreie Stadt	3	5	278
DE262				Schweinfurt, Kreisfreie Stadt	3	5	279
DE263				Würzburg, Kreisfreie Stadt	3	5	280
DE264				Aschaffenburg, Landkreis	3	5	281
DE265				Bad Kissingen	3	5	282
DE266				Rhön-Grabfeld	3	5	283
DE267				Haßberge	3	5	284
DE268				Kitzingen	3	5	285
DE269				Miltenberg	3	5	286
DE26A				Main-Spessart	3	5	287
DE26B				Schweinfurt, Landkreis	3	5	288
DE26C				Würzburg, Landkreis	3	5	289
DE27			Schwaben		2	5	290
DE271				Augsburg, Kreisfreie Stadt	3	5	291
DE272				Kaufbeuren, Kreisfreie Stadt	3	5	292
DE273				Kempten (Allgäu), Kreisfreie Stadt	3	5	293
DE274				Memmingen, Kreisfreie Stadt	3	5	294
DE275				Aichach-Friedberg	3	5	295
DE276				Augsburg, Landkreis	3	5	296
DE277				Dillingen a.d. Donau	3	5	297
DE278				Günzburg	3	5	298
DE279				Neu-Ulm	3	5	299
DE27A				Lindau (Bodensee)	3	5	300
DE27B				Ostallgäu	3	5	301
DE27C				Unterallgäu	3	5	302
DE27D				Donau-Ries	3	5	303
DE27E				Oberallgäu	3	5	304
DE3		Berlin			1	5	305
DE30			Berlin		2	5	306
DE300				Berlin	3	5	307
DE4		Brandenburg			1	5	308
DE40			Brandenburg		2	5	309
DE401				Brandenburg an der Havel, Kreisfreie Stadt	3	5	310
DE402				Cottbus, Kreisfreie Stadt	3	5	311
DE403				Frankfurt (Oder), Kreisfreie Stadt	3	5	312
DE404				Potsdam, Kreisfreie Stadt	3	5	313
DE405				Barnim	3	5	314
DE406				Dahme-Spreewald	3	5	315
DE407				Elbe-Elster	3	5	316
DE408				Havelland	3	5	317
DE409				Märkisch-Oderland	3	5	318
DE40A				Oberhavel	3	5	319
DE40B				Oberspreewald-Lausitz	3	5	320
DE40C				Oder-Spree	3	5	321
DE40D				Ostprignitz-Ruppin	3	5	322
DE40E				Potsdam-Mittelmark	3	5	323
DE40F				Prignitz	3	5	324
DE40G				Spree-Neiße	3	5	325
DE40H				Teltow-Fläming	3	5	326
DE40I				Uckermark	3	5	327
DE5		Bremen			1	5	328
DE50			Bremen		2	5	329
DE501				Bremen, Kreisfreie Stadt	3	5	330
DE502				Bremerhaven, Kreisfreie Stadt	3	5	331
DE6		Hamburg			1	5	332
DE60			Hamburg		2	5	333
DE600				Hamburg	3	5	334
DE7		Hessen			1	5	335
DE71			Darmstadt		2	5	336
DE711				Darmstadt, Kreisfreie Stadt	3	5	337
DE712				Frankfurt am Main, Kreisfreie Stadt	3	5	338
DE713				Offenbach am Main, Kreisfreie Stadt	3	5	339
DE714				Wiesbaden, Kreisfreie Stadt	3	5	340
DE715				Bergstraße	3	5	341
DE716				Darmstadt-Dieburg	3	5	342
DE717				Groß-Gerau	3	5	343
DE718				Hochtaunuskreis	3	5	344
DE719				Main-Kinzig-Kreis	3	5	345
DE71A				Main-Taunus-Kreis	3	5	346
DE71B				Odenwaldkreis	3	5	347
DE71C				Offenbach, Landkreis	3	5	348
DE71D				Rheingau-Taunus-Kreis	3	5	349
DE71E				Wetteraukreis	3	5	350
DE72			Gießen		2	5	351
DE721				Gießen, Landkreis	3	5	352
DE722				Lahn-Dill-Kreis	3	5	353
DE723				Limburg-Weilburg	3	5	354
DE724				Marburg-Biedenkopf	3	5	355
DE725				Vogelsbergkreis	3	5	356
DE73			Kassel		2	5	357
DE731				Kassel, Kreisfreie Stadt	3	5	358
DE732				Fulda	3	5	359
DE733				Hersfeld-Rotenburg	3	5	360
DE734				Kassel, Landkreis	3	5	361
DE735				Schwalm-Eder-Kreis	3	5	362
DE736				Waldeck-Frankenberg	3	5	363
DE737				Werra-Meißner-Kreis	3	5	364
DE8		Mecklenburg-Vorpommern			1	5	365
DE80			Mecklenburg-Vorpommern		2	5	366
DE803				Rostock, Kreisfreie Stadt	3	5	367
DE804				Schwerin, Kreisfreie Stadt	3	5	368
DE80J				Mecklenburgische Seenplatte	3	5	369
DE80K				Landkreis Rostock	3	5	370
DE80L				Vorpommern-Rügen	3	5	371
DE80M				Nordwestmecklenburg	3	5	372
DE80N				Vorpommern-Greifswald	3	5	373
DE80O				Ludwigslust-Parchim	3	5	374
DE9		Niedersachsen			1	5	375
DE91			Braunschweig		2	5	376
DE911				Braunschweig, Kreisfreie Stadt	3	5	377
DE912				Salzgitter, Kreisfreie Stadt	3	5	378
DE913				Wolfsburg, Kreisfreie Stadt	3	5	379
DE914				Gifhorn	3	5	380
DE916				Goslar	3	5	381
DE917				Helmstedt	3	5	382
DE918				Northeim	3	5	383
DE91A				Peine	3	5	384
DE91B				Wolfenbüttel	3	5	385
DE91C				Göttingen	3	5	386
DE92			Hannover		2	5	387
DE922				Diepholz	3	5	388
DE923				Hameln-Pyrmont	3	5	389
DE925				Hildesheim	3	5	390
DE926				Holzminden	3	5	391
DE927				Nienburg (Weser)	3	5	392
DE928				Schaumburg	3	5	393
DE929				Region Hannover	3	5	394
DE93			Lüneburg		2	5	395
DE931				Celle	3	5	396
DE932				Cuxhaven	3	5	397
DE933				Harburg	3	5	398
DE934				Lüchow-Dannenberg	3	5	399
DE935				Lüneburg, Landkreis	3	5	400
DE936				Osterholz	3	5	401
DE937				Rotenburg (Wümme)	3	5	402
DE938				Heidekreis	3	5	403
DE939				Stade	3	5	404
DE93A				Uelzen	3	5	405
DE93B				Verden	3	5	406
DE94			Weser-Ems		2	5	407
DE941				Delmenhorst, Kreisfreie Stadt	3	5	408
DE942				Emden, Kreisfreie Stadt	3	5	409
DE943				Oldenburg (Oldenburg), Kreisfreie Stadt	3	5	410
DE944				Osnabrück, Kreisfreie Stadt	3	5	411
DE945				Wilhelmshaven, Kreisfreie Stadt	3	5	412
DE946				Ammerland	3	5	413
DE947				Aurich	3	5	414
DE948				Cloppenburg	3	5	415
DE949				Emsland	3	5	416
DE94A				Friesland (DE)	3	5	417
DE94B				Grafschaft Bentheim	3	5	418
DE94C				Leer	3	5	419
DE94D				Oldenburg, Landkreis	3	5	420
DE94E				Osnabrück, Landkreis	3	5	421
DE94F				Vechta	3	5	422
DE94G				Wesermarsch	3	5	423
DE94H				Wittmund	3	5	424
DEA		Nordrhein-Westfalen			1	5	425
DEA1			Düsseldorf		2	5	426
DEA11				Düsseldorf, Kreisfreie Stadt	3	5	427
DEA12				Duisburg, Kreisfreie Stadt	3	5	428
DEA13				Essen, Kreisfreie Stadt	3	5	429
DEA14				Krefeld, Kreisfreie Stadt	3	5	430
DEA15				Mönchengladbach, Kreisfreie Stadt	3	5	431
DEA16				Mülheim an der Ruhr, Kreisfreie Stadt	3	5	432
DEA17				Oberhausen, Kreisfreie Stadt	3	5	433
DEA18				Remscheid, Kreisfreie Stadt	3	5	434
DEA19				Solingen, Kreisfreie Stadt	3	5	435
DEA1A				Wuppertal, Kreisfreie Stadt	3	5	436
DEA1B				Kleve	3	5	437
DEA1C				Mettmann	3	5	438
DEA1D				Rhein-Kreis Neuss	3	5	439
DEA1E				Viersen	3	5	440
DEA1F				Wesel	3	5	441
DEA2			Köln		2	5	442
DEA22				Bonn, Kreisfreie Stadt	3	5	443
DEA23				Köln, Kreisfreie Stadt	3	5	444
DEA24				Leverkusen, Kreisfreie Stadt	3	5	445
DEA26				Düren	3	5	446
DEA27				Rhein-Erft-Kreis	3	5	447
DEA28				Euskirchen	3	5	448
DEA29				Heinsberg	3	5	449
DEA2A				Oberbergischer Kreis	3	5	450
DEA2B				Rheinisch-Bergischer Kreis	3	5	451
DEA2C				Rhein-Sieg-Kreis	3	5	452
DEA2D				Städteregion Aachen	3	5	453
DEA3			Münster		2	5	454
DEA31				Bottrop, Kreisfreie Stadt	3	5	455
DEA32				Gelsenkirchen, Kreisfreie Stadt	3	5	456
DEA33				Münster, Kreisfreie Stadt	3	5	457
DEA34				Borken	3	5	458
DEA35				Coesfeld	3	5	459
DEA36				Recklinghausen	3	5	460
DEA37				Steinfurt	3	5	461
DEA38				Warendorf	3	5	462
DEA4			Detmold		2	5	463
DEA41				Bielefeld, Kreisfreie Stadt	3	5	464
DEA42				Gütersloh	3	5	465
DEA43				Herford	3	5	466
DEA44				Höxter	3	5	467
DEA45				Lippe	3	5	468
DEA46				Minden-Lübbecke	3	5	469
DEA47				Paderborn	3	5	470
DEA5			Arnsberg		2	5	471
DEA51				Bochum, Kreisfreie Stadt	3	5	472
DEA52				Dortmund, Kreisfreie Stadt	3	5	473
DEA53				Hagen, Kreisfreie Stadt	3	5	474
DEA54				Hamm, Kreisfreie Stadt	3	5	475
DEA55				Herne, Kreisfreie Stadt	3	5	476
DEA56				Ennepe-Ruhr-Kreis	3	5	477
DEA57				Hochsauerlandkreis	3	5	478
DEA58				Märkischer Kreis	3	5	479
DEA59				Olpe	3	5	480
DEA5A				Siegen-Wittgenstein	3	5	481
DEA5B				Soest	3	5	482
DEA5C				Unna	3	5	483
DEB		Rheinland-Pfalz			1	5	484
DEB1			Koblenz		2	5	485
DEB11				Koblenz, Kreisfreie Stadt	3	5	486
DEB12				Ahrweiler	3	5	487
DEB13				Altenkirchen (Westerwald)	3	5	488
DEB14				Bad Kreuznach	3	5	489
DEB15				Birkenfeld	3	5	490
DEB17				Mayen-Koblenz	3	5	491
DEB18				Neuwied	3	5	492
DEB1A				Rhein-Lahn-Kreis	3	5	493
DEB1B				Westerwaldkreis	3	5	494
DEB1C				Cochem-Zell	3	5	495
DEB1D				Rhein-Hunsrück-Kreis	3	5	496
DEB2			Trier		2	5	497
DEB21				Trier, Kreisfreie Stadt	3	5	498
DEB22				Bernkastel-Wittlich	3	5	499
DEB23				Eifelkreis Bitburg-Prüm	3	5	500
DEB24				Vulkaneifel	3	5	501
DEB25				Trier-Saarburg	3	5	502
DEB3			Rheinhessen-Pfalz		2	5	503
DEB31				Frankenthal (Pfalz), Kreisfreie Stadt	3	5	504
DEB32				Kaiserslautern, Kreisfreie Stadt	3	5	505
DEB33				Landau in der Pfalz, Kreisfreie Stadt	3	5	506
DEB34				Ludwigshafen am Rhein, Kreisfreie Stadt	3	5	507
DEB35				Mainz, Kreisfreie Stadt	3	5	508
DEB36				Neustadt an der Weinstraße, Kreisfreie Stadt	3	5	509
DEB37				Pirmasens, Kreisfreie Stadt	3	5	510
DEB38				Speyer, Kreisfreie Stadt	3	5	511
DEB39				Worms, Kreisfreie Stadt	3	5	512
DEB3A				Zweibrücken, Kreisfreie Stadt	3	5	513
DEB3B				Alzey-Worms	3	5	514
DEB3C				Bad Dürkheim	3	5	515
DEB3D				Donnersbergkreis	3	5	516
DEB3E				Germersheim	3	5	517
DEB3F				Kaiserslautern, Landkreis	3	5	518
DEB3G				Kusel	3	5	519
DEB3H				Südliche Weinstraße	3	5	520
DEB3I				Rhein-Pfalz-Kreis	3	5	521
DEB3J				Mainz-Bingen	3	5	522
DEB3K				Südwestpfalz	3	5	523
DEC		Saarland			1	5	524
DEC0			Saarland		2	5	525
DEC01				Regionalverband Saarbrücken	3	5	526
DEC02				Merzig-Wadern	3	5	527
DEC03				Neunkirchen	3	5	528
DEC04				Saarlouis	3	5	529
DEC05				Saarpfalz-Kreis	3	5	530
DEC06				St. Wendel	3	5	531
DED		Sachsen			1	5	532
DED2			Dresden		2	5	533
DED21				Dresden, Kreisfreie Stadt	3	5	534
DED2C				Bautzen	3	5	535
DED2D				Görlitz	3	5	536
DED2E				Meißen	3	5	537
DED2F				Sächsische Schweiz-Osterzgebirge	3	5	538
DED4			Chemnitz		2	5	539
DED41				Chemnitz, Kreisfreie Stadt	3	5	540
DED42				Erzgebirgskreis	3	5	541
DED43				Mittelsachsen	3	5	542
DED44				Vogtlandkreis	3	5	543
DED45				Zwickau	3	5	544
DED5			Leipzig		2	5	545
DED51				Leipzig, Kreisfreie Stadt	3	5	546
DED52				Leipzig	3	5	547
DED53				Nordsachsen	3	5	548
DEE		Sachsen-Anhalt			1	5	549
DEE0			Sachsen-Anhalt		2	5	550
DEE01				Dessau-Roßlau, Kreisfreie Stadt	3	5	551
DEE02				Halle (Saale), Kreisfreie Stadt	3	5	552
DEE03				Magdeburg, Kreisfreie Stadt	3	5	553
DEE04				Altmarkkreis Salzwedel	3	5	554
DEE05				Anhalt-Bitterfeld	3	5	555
DEE06				Jerichower Land	3	5	556
DEE07				Börde	3	5	557
DEE08				Burgenlandkreis	3	5	558
DEE09				Harz	3	5	559
DEE0A				Mansfeld-Südharz	3	5	560
DEE0B				Saalekreis	3	5	561
DEE0C				Salzlandkreis	3	5	562
DEE0D				Stendal	3	5	563
DEE0E				Wittenberg	3	5	564
DEF		Schleswig-Holstein			1	5	565
DEF0			Schleswig-Holstein		2	5	566
DEF01				Flensburg, Kreisfreie Stadt	3	5	567
DEF02				Kiel, Kreisfreie Stadt	3	5	568
DEF03				Lübeck, Kreisfreie Stadt	3	5	569
DEF04				Neumünster, Kreisfreie Stadt	3	5	570
DEF05				Dithmarschen	3	5	571
DEF06				Herzogtum Lauenburg	3	5	572
DEF07				Nordfriesland	3	5	573
DEF08				Ostholstein	3	5	574
DEF09				Pinneberg	3	5	575
DEF0A				Plön	3	5	576
DEF0B				Rendsburg-Eckernförde	3	5	577
DEF0C				Schleswig-Flensburg	3	5	578
DEF0D				Segeberg	3	5	579
DEF0E				Steinburg	3	5	580
DEF0F				Stormarn	3	5	581
DEG		Thüringen			1	5	582
DEG0			Thüringen		2	5	583
DEG01				Erfurt, Kreisfreie Stadt	3	5	584
DEG02				Gera, Kreisfreie Stadt	3	5	585
DEG03				Jena, Kreisfreie Stadt	3	5	586
DEG04				Suhl, Kreisfreie Stadt	3	5	587
DEG05				Weimar, Kreisfreie Stadt	3	5	588
DEG06				Eichsfeld	3	5	589
DEG07				Nordhausen	3	5	590
DEG09				Unstrut-Hainich-Kreis	3	5	591
DEG0A				Kyffhäuserkreis	3	5	592
DEG0B				Schmalkalden-Meiningen	3	5	593
DEG0C				Gotha	3	5	594
DEG0D				Sömmerda	3	5	595
DEG0E				Hildburghausen	3	5	596
DEG0F				Ilm-Kreis	3	5	597
DEG0G				Weimarer Land	3	5	598
DEG0H				Sonneberg	3	5	599
DEG0I				Saalfeld-Rudolstadt	3	5	600
DEG0J				Saale-Holzland-Kreis	3	5	601
DEG0K				Saale-Orla-Kreis	3	5	602
DEG0L				Greiz	3	5	603
DEG0M				Altenburger Land	3	5	604
DEG0N				Eisenach, Kreisfreie Stadt	3	5	605
DEG0P				Wartburgkreis	3	5	606
DEZ		Extra-Regio NUTS 1			1	5	607
DEZZ			Extra-Regio NUTS 2		2	5	608
DEZZZ				Extra-Regio NUTS 3	3	5	609
EE	Eesti				0	6	610
EE0		Eesti			1	6	611
EE00			Eesti		2	6	612
EE001				Põhja-Eesti	3	6	613
EE004				Lääne-Eesti	3	6	614
EE008				Lõuna-Eesti	3	6	615
EE009				Kesk-Eesti	3	6	616
EE00A				Kirde-Eesti	3	6	617
EEZ		Extra-Regio NUTS 1			1	6	618
EEZZ			Extra-Regio NUTS 2		2	6	619
EEZZZ				Extra-Regio NUTS 3	3	6	620
IE	Éire/Ireland				0	7	621
IE0		Ireland			1	7	622
IE04			Northern and Western		2	7	623
IE041				Border	3	7	624
IE042				West	3	7	625
IE05			Southern		2	7	626
IE051				Mid-West	3	7	627
IE052				South-East	3	7	628
IE053				South-West	3	7	629
IE06			Eastern and Midland		2	7	630
IE061				Dublin	3	7	631
IE062				Mid-East	3	7	632
IE063				Midland	3	7	633
IEZ		Extra-Regio NUTS 1			1	7	634
IEZZ			Extra-Regio NUTS 2		2	7	635
IEZZZ				Extra-Regio NUTS 3	3	7	636
EL	Ελλάδα				0	8	637		EL	Elláda
EL3		Αττική			1	8	638		EL3	Attiki
EL30			Aττική		2	8	639		EL30		Attiki
EL301				Βόρειος Τομέας Αθηνών	3	8	640		EL301			Voreios Tomeas Athinon
EL302				Δυτικός Τομέας Αθηνών	3	8	641		EL302			Dytikos Tomeas Athinon
EL303				Κεντρικός Τομέας Αθηνών	3	8	642		EL303			Kentrikos Tomeas Athinon
EL304				Νότιος Τομέας Αθηνών	3	8	643		EL304			Notios Tomeas Athinon
EL305				Ανατολική Αττική	3	8	644		EL305			Anatoliki Attiki
EL306				Δυτική Αττική	3	8	645		EL306			Dytiki Attiki
EL307				Πειραιάς, Νήσοι	3	8	646		EL307			Peiraias, Nisoi
EL4		Νησιά Αιγαίου, Κρήτη			1	8	647		EL4	Nisia Aigaiou, Kriti
EL41			Βόρειο Αιγαίο		2	8	648		EL41		Voreio Aigaio
EL411				Λέσβος, Λήμνος	3	8	649		EL411			Lesvos, Limnos
EL412				Ικαρία, Σάμος	3	8	650		EL412			Ikaria, Samos
EL413				Χίος	3	8	651		EL413			Chios
EL42			Νότιο Αιγαίο		2	8	652		EL42		Notio Aigaio
EL421				Κάλυμνος, Κάρπαθος – Ηρωική Νήσος Κάσος, Κως, Ρόδος	3	8	653		EL421			Kalymnos, Karpathos, Kasos, Kos, Rodos
EL422				Άνδρος, Θήρα, Κέα, Μήλος, Μύκονος, Νάξος, Πάρος, Σύρος, Τήνος	3	8	654		EL422			Andros, Thira, Kea, Milos, Mykonos, Naxos, Paros, Syros, Tinos
EL43			Κρήτη		2	8	655		EL43		Kriti
EL431				Ηράκλειο	3	8	656		EL431			Irakleio
EL432				Λασίθι	3	8	657		EL432			Lasithi
EL433				Ρέθυμνο	3	8	658		EL433			Rethymni
EL434				Χανιά	3	8	659		EL434			Chania
EL5		Βόρεια Ελλάδα			1	8	660		EL5	Voreia Elláda
EL51			Aνατολική Μακεδονία, Θράκη		2	8	661		EL51		Anatoliki Makedonia, Thraki
EL511				Έβρος	3	8	662		EL511			Evros
EL512				Ξάνθη	3	8	663		EL512			Xanthi
EL513				Ροδόπη	3	8	664		EL513			Rodopi
EL514				Δράμα	3	8	665		EL514			Drama
EL515				Θάσος, Καβάλα	3	8	666		EL515			Thasos, Kavala
EL52			Κεντρική Μακεδονία		2	8	667		EL52		Kentriki Makedonia
EL521				Ημαθία	3	8	668		EL521			Imathia
EL522				Θεσσαλονίκη	3	8	669		EL522			Thessaloniki
EL523				Κιλκίς	3	8	670		EL523			Kilkis
EL524				Πέλλα	3	8	671		EL524			Pella
EL525				Πιερία	3	8	672		EL525			Pieria
EL526				Σέρρες	3	8	673		EL526			Serres
EL527				Χαλκιδική	3	8	674		EL527			Chalkidiki
EL53			Δυτική Μακεδονία		2	8	675		EL53		Dytiki Makedonia
EL531				Γρεβενά, Κοζάνη	3	8	676		EL531			Grevena, Kozani
EL532				Καστοριά	3	8	677		EL532			Kastoria
EL533				Φλώρινα	3	8	678		EL533			Florina
EL54			Ήπειρος		2	8	679		EL54		Ipeiros
EL541				Άρτα, Πρέβεζα	3	8	680		EL541			Arta, Preveza
EL542				Θεσπρωτία	3	8	681		EL542			Thesprotia
EL543				Ιωάννινα	3	8	682		EL543			Ioannina
EL6		Κεντρική Ελλάδα			1	8	683		EL6	Kentriki Elláda
EL61			Θεσσαλία		2	8	684		EL61		Thessalia
EL611				Καρδίτσα, Τρίκαλα	3	8	685		EL611			Karditsa, Trikala
EL612				Λάρισα	3	8	686		EL612			Larisa
EL613				Μαγνησία, Σποράδες	3	8	687		EL613			Magnisia, Sporades
EL62			Ιόνια Νησιά		2	8	688		EL62		Ionia Nisia
EL621				Ζάκυνθος	3	8	689		EL621			Zakynthos
EL622				Κέρκυρα	3	8	690		EL622			Kerkyra
EL623				Ιθάκη, Κεφαλληνία	3	8	691		EL623			Ithaki, Kefallinia
EL624				Λευκάδα	3	8	692		EL624			Lefkada
EL63			Δυτική Ελλάδα		2	8	693		EL63		Dytiki Elláda
EL631				Αιτωλοακαρνανία	3	8	694		EL631			Aitoloakarnania
EL632				Αχαΐα	3	8	695		EL632			Achaia
EL633				Ηλεία	3	8	696		EL633			Ileia
EL64			Στερεά Ελλάδα		2	8	697		EL64		Sterea Elláda
EL641				Βοιωτία	3	8	698		EL641			Voiotia
EL642				Εύβοια	3	8	699		EL642			Evvoia
EL643				Ευρυτανία	3	8	700		EL643			Evrytania
EL644				Φθιώτιδα	3	8	701		EL644			Fthiotida
EL645				Φωκίδα	3	8	702		EL645			Fokida
EL65			Πελοπόννησος		2	8	703		EL65		Peloponnisos
EL651				Αργολίδα, Αρκαδία	3	8	704		EL651			Argolida, Arkadia
EL652				Κορινθία	3	8	705		EL652			Korinthia
EL653				Λακωνία, Μεσσηνία	3	8	706		EL653			Lakonia, Messinia
ELZ		Extra-Regio NUTS 1			1	8	707		ELZ	Extra-Regio NUTS 1
ELZZ			Extra-Regio NUTS 2		2	8	708		ELZZ		Extra-Regio NUTS 2
ELZZZ				Extra-Regio NUTS 3	3	8	709		ELZZZ			Extra-Regio NUTS 3
ES	España				0	9	710
ES1		Noroeste			1	9	711		The version in Latin characters is not official. It is included here only for the sake of comprehension.
ES11			Galicia		2	9	712
ES111				A Coruña	3	9	713
ES112				Lugo	3	9	714
ES113				Ourense	3	9	715
ES114				Pontevedra	3	9	716
ES12			Principado de Asturias		2	9	717
ES120				Asturias	3	9	718
ES13			Cantabria		2	9	719
ES130				Cantabria	3	9	720
ES2		Noreste			1	9	721
ES21			País Vasco		2	9	722
ES211				Araba/Álava	3	9	723
ES212				Gipuzkoa	3	9	724
ES213				Bizkaia	3	9	725
ES22			Comunidad Foral de Navarra		2	9	726
ES220				Navarra	3	9	727
ES23			La Rioja		2	9	728
ES230				La Rioja	3	9	729
ES24			Aragón		2	9	730
ES241				Huesca	3	9	731
ES242				Teruel	3	9	732
ES243				Zaragoza	3	9	733
ES3		Comunidad de Madrid			1	9	734
ES30			Comunidad de Madrid		2	9	735
ES300				Madrid	3	9	736
ES4		Centro (ES)			1	9	737
ES41			Castilla y León		2	9	738
ES411				Ávila	3	9	739
ES412				Burgos	3	9	740
ES413				León	3	9	741
ES414				Palencia	3	9	742
ES415				Salamanca	3	9	743
ES416				Segovia	3	9	744
ES417				Soria	3	9	745
ES418				Valladolid	3	9	746
ES419				Zamora	3	9	747
ES42			Castilla-La Mancha		2	9	748
ES421				Albacete	3	9	749
ES422				Ciudad Real	3	9	750
ES423				Cuenca	3	9	751
ES424				Guadalajara	3	9	752
ES425				Toledo	3	9	753
ES43			Extremadura		2	9	754
ES431				Badajoz	3	9	755
ES432				Cáceres	3	9	756
ES5		Este			1	9	757
ES51			Cataluña		2	9	758
ES511				Barcelona	3	9	759
ES512				Girona	3	9	760
ES513				Lleida	3	9	761
ES514				Tarragona	3	9	762
ES52			Comunitat Valenciana		2	9	763
ES521				Alicante/Alacant	3	9	764
ES522				Castellón/Castelló	3	9	765
ES523				Valencia/València	3	9	766
ES53			Illes Balears		2	9	767
ES531				Eivissa y Formentera	3	9	768
ES532				Mallorca	3	9	769
ES533				Menorca	3	9	770
ES6		Sur			1	9	771
ES61			Andalucía		2	9	772
ES611				Almería	3	9	773
ES612				Cádiz	3	9	774
ES613				Córdoba	3	9	775
ES614				Granada	3	9	776
ES615				Huelva	3	9	777
ES616				Jaén	3	9	778
ES617				Málaga	3	9	779
ES618				Sevilla	3	9	780
ES62			Región de Murcia		2	9	781
ES620				Murcia	3	9	782
ES63			Ciudad de Ceuta		2	9	783
ES630				Ceuta	3	9	784
ES64			Ciudad de Melilla		2	9	785
ES640				Melilla	3	9	786
ES7		Canarias			1	9	787
ES70			Canarias		2	9	788
ES703				El Hierro	3	9	789
ES704				Fuerteventura	3	9	790
ES705				Gran Canaria	3	9	791
ES706				La Gomera	3	9	792
ES707				La Palma	3	9	793
ES708				Lanzarote	3	9	794
ES709				Tenerife	3	9	795
ESZ		Extra-Regio NUTS 1			1	9	796
ESZZ			Extra-Regio NUTS 2		2	9	797
ESZZZ				Extra-Regio NUTS 3	3	9	798
FR	France				0	10	799
FR1		Ile-de-France			1	10	800
FR10			Ile-de-France		2	10	801
FR101				Paris	3	10	802
FR102				Seine-et-Marne	3	10	803
FR103				Yvelines	3	10	804
FR104				Essonne	3	10	805
FR105				Hauts-de-Seine	3	10	806
FR106				Seine-Saint-Denis	3	10	807
FR107				Val-de-Marne	3	10	808
FR108				Val-d’Oise	3	10	809
FRB		Centre — Val de Loire			1	10	810
FRB0			Centre — Val de Loire		2	10	811
FRB01				Cher	3	10	812
FRB02				Eure-et-Loir	3	10	813
FRB03				Indre	3	10	814
FRB04				Indre-et-Loire	3	10	815
FRB05				Loir-et-Cher	3	10	816
FRB06				Loiret	3	10	817
FRC		Bourgogne-Franche-Comté			1	10	818
FRC1			Bourgogne		2	10	819
FRC11				Côte-d’Or	3	10	820
FRC12				Nièvre	3	10	821
FRC13				Saône-et-Loire	3	10	822
FRC14				Yonne	3	10	823
FRC2			Franche-Comté		2	10	824
FRC21				Doubs	3	10	825
FRC22				Jura	3	10	826
FRC23				Haute-Saône	3	10	827
FRC24				Territoire de Belfort	3	10	828
FRD		Normandie			1	10	829
FRD1			Basse-Normandie		2	10	830
FRD11				Calvados	3	10	831
FRD12				Manche	3	10	832
FRD13				Orne	3	10	833
FRD2			Haute-Normandie		2	10	834
FRD21				Eure	3	10	835
FRD22				Seine-Maritime	3	10	836
FRE		Hauts-de-France			1	10	837
FRE1			Nord-Pas de Calais		2	10	838
FRE11				Nord	3	10	839
FRE12				Pas-de-Calais	3	10	840
FRE2			Picardie		2	10	841
FRE21				Aisne	3	10	842
FRE22				Oise	3	10	843
FRE23				Somme	3	10	844
FRF		Grand Est			1	10	845
FRF1			Alsace		2	10	846
FRF11				Bas-Rhin	3	10	847
FRF12				Haut-Rhin	3	10	848
FRF2			Champagne-Ardenne		2	10	849
FRF21				Ardennes	3	10	850
FRF22				Aube	3	10	851
FRF23				Marne	3	10	852
FRF24				Haute-Marne	3	10	853
FRF3			Lorraine		2	10	854
FRF31				Meurthe-et-Moselle	3	10	855
FRF32				Meuse	3	10	856
FRF33				Moselle	3	10	857
FRF34				Vosges	3	10	858
FRG		Pays de la Loire			1	10	859
FRG0			Pays de la Loire		2	10	860
FRG01				Loire-Atlantique	3	10	861
FRG02				Maine-et-Loire	3	10	862
FRG03				Mayenne	3	10	863
FRG04				Sarthe	3	10	864
FRG05				Vendée	3	10	865
FRH		Bretagne			1	10	866
FRH0			Bretagne		2	10	867
FRH01				Côtes-d’Armor	3	10	868
FRH02				Finistère	3	10	869
FRH03				Ille-et-Vilaine	3	10	870
FRH04				Morbihan	3	10	871
FRI		Nouvelle-Aquitaine			1	10	872
FRI1			Aquitaine		2	10	873
FRI11				Dordogne	3	10	874
FRI12				Gironde	3	10	875
FRI13				Landes	3	10	876
FRI14				Lot-et-Garonne	3	10	877
FRI15				Pyrénées-Atlantiques	3	10	878
FRI2			Limousin		2	10	879
FRI21				Corrèze	3	10	880
FRI22				Creuse	3	10	881
FRI23				Haute-Vienne	3	10	882
FRI3			Poitou-Charentes		2	10	883
FRI31				Charente	3	10	884
FRI32				Charente-Maritime	3	10	885
FRI33				Deux-Sèvres	3	10	886
FRI34				Vienne	3	10	887
FRJ		Occitanie			1	10	888
FRJ1			Languedoc-Roussillon		2	10	889
FRJ11				Aude	3	10	890
FRJ12				Gard	3	10	891
FRJ13				Hérault	3	10	892
FRJ14				Lozère	3	10	893
FRJ15				Pyrénées-Orientales	3	10	894
FRJ2			Midi-Pyrénées		2	10	895
FRJ21				Ariège	3	10	896
FRJ22				Aveyron	3	10	897
FRJ23				Haute-Garonne	3	10	898
FRJ24				Gers	3	10	899
FRJ25				Lot	3	10	900
FRJ26				Hautes-Pyrénées	3	10	901
FRJ27				Tarn	3	10	902
FRJ28				Tarn-et-Garonne	3	10	903
FRK		Auvergne-Rhône-Alpes			1	10	904
FRK1			Auvergne		2	10	905
FRK11				Allier	3	10	906
FRK12				Cantal	3	10	907
FRK13				Haute-Loire	3	10	908
FRK14				Puy-de-Dôme	3	10	909
FRK2			Rhône-Alpes		2	10	910
FRK21				Ain	3	10	911
FRK22				Ardèche	3	10	912
FRK23				Drôme	3	10	913
FRK24				Isère	3	10	914
FRK25				Loire	3	10	915
FRK26				Rhône	3	10	916
FRK27				Savoie	3	10	917
FRK28				Haute-Savoie	3	10	918
FRL		Provence-Alpes-Côte d’Azur			1	10	919
FRL0			Provence-Alpes-Côte d’Azur		2	10	920
FRL01				Alpes-de-Haute-Provence	3	10	921
FRL02				Hautes-Alpes	3	10	922
FRL03				Alpes-Maritimes	3	10	923
FRL04				Bouches-du-Rhône	3	10	924
FRL05				Var	3	10	925
FRL06				Vaucluse	3	10	926
FRM		Corse			1	10	927
FRM0			Corse		2	10	928
FRM01				Corse-du-Sud	3	10	929
FRM02				Haute-Corse	3	10	930
FRY		RUP FR — Régions Ultrapériphériques Françaises			1	10	931
FRY1			Guadeloupe		2	10	932
FRY10				Guadeloupe	3	10	933
FRY2			Martinique		2	10	934
FRY20				Martinique	3	10	935
FRY3			Guyane		2	10	936
FRY30				Guyane	3	10	937
FRY4			La Réunion		2	10	938
FRY40				La Réunion	3	10	939
FRY5			Mayotte		2	10	940
FRY50				Mayotte	3	10	941
FRZ		Extra-Regio NUTS 1			1	10	942
FRZZ			Extra-Regio NUTS 2		2	10	943
FRZZZ				Extra-Regio NUTS 3	3	10	944
HR	Hrvatska				0	11	945
HR0		Hrvatska			1	11	946
HR02			Panonska Hrvatska		2	11	947
HR021				Bjelovarsko-bilogorska županija	3	11	948
HR022				Virovitičko-podravska županija	3	11	949
HR023				Požeško-slavonska županija	3	11	950
HR024				Brodsko-posavska županija	3	11	951
HR025				Osječko-baranjska županija	3	11	952
HR026				Vukovarsko-srijemska županija	3	11	953
HR027				Karlovačka županija	3	11	954
HR028				Sisačko-moslavačka županija	3	11	955
HR03			Jadranska Hrvatska		2	11	956
HR031				Primorsko-goranska županija	3	11	957
HR032				Ličko-senjska županija	3	11	958
HR033				Zadarska županija	3	11	959
HR034				Šibensko-kninska županija	3	11	960
HR035				Splitsko-dalmatinska županija	3	11	961
HR036				Istarska županija	3	11	962
HR037				Dubrovačko-neretvanska županija	3	11	963
HR05			Grad Zagreb		2	11	964
HR050				Grad Zagreb	3	11	965
HR06			Sjeverna Hrvatska		2	11	966
HR061				Međimurska županija	3	11	967
HR062				Varaždinska županija	3	11	968
HR063				Koprivničko-križevačka županija	3	11	969
HR064				Krapinsko-zagorska županija	3	11	970
HR065				Zagrebačka županija	3	11	971
HRZ		Extra-Regio NUTS 1			1	11	972
HRZZ			Extra-Regio NUTS 2		2	11	973
HRZZZ				Extra-Regio NUTS 3	3	11	974
IT	Italia				0	12	975
ITC		Nord-Ovest			1	12	976
ITC1			Piemonte		2	12	977
ITC11				Torino	3	12	978
ITC12				Vercelli	3	12	979
ITC13				Biella	3	12	980
ITC14				Verbano-Cusio-Ossola	3	12	981
ITC15				Novara	3	12	982
ITC16				Cuneo	3	12	983
ITC17				Asti	3	12	984
ITC18				Alessandria	3	12	985
ITC2			Valle d’Aosta/Vallée d’Aoste		2	12	986
ITC20				Valle d’Aosta/Vallée d’Aoste	3	12	987
ITC3			Liguria		2	12	988
ITC31				Imperia	3	12	989
ITC32				Savona	3	12	990
ITC33				Genova	3	12	991
ITC34				La Spezia	3	12	992
ITC4			Lombardia		2	12	993
ITC41				Varese	3	12	994
ITC42				Como	3	12	995
ITC43				Lecco	3	12	996
ITC44				Sondrio	3	12	997
ITC46				Bergamo	3	12	998
ITC47				Brescia	3	12	999
ITC48				Pavia	3	12	1000
ITC49				Lodi	3	12	1001
ITC4A				Cremona	3	12	1002
ITC4B				Mantova	3	12	1003
ITC4C				Milano	3	12	1004
ITC4D				Monza e della Brianza	3	12	1005
ITF		Sud			1	12	1006
ITF1			Abruzzo		2	12	1007
ITF11				L’Aquila	3	12	1008
ITF12				Teramo	3	12	1009
ITF13				Pescara	3	12	1010
ITF14				Chieti	3	12	1011
ITF2			Molise		2	12	1012
ITF21				Isernia	3	12	1013
ITF22				Campobasso	3	12	1014
ITF3			Campania		2	12	1015
ITF31				Caserta	3	12	1016
ITF32				Benevento	3	12	1017
ITF33				Napoli	3	12	1018
ITF34				Avellino	3	12	1019
ITF35				Salerno	3	12	1020
ITF4			Puglia		2	12	1021
ITF43				Taranto	3	12	1022
ITF44				Brindisi	3	12	1023
ITF45				Lecce	3	12	1024
ITF46				Foggia	3	12	1025
ITF47				Bari	3	12	1026
ITF48				Barletta-Andria-Trani	3	12	1027
ITF5			Basilicata		2	12	1028
ITF51				Potenza	3	12	1029
ITF52				Matera	3	12	1030
ITF6			Calabria		2	12	1031
ITF61				Cosenza	3	12	1032
ITF62				Crotone	3	12	1033
ITF63				Catanzaro	3	12	1034
ITF64				Vibo Valentia	3	12	1035
ITF65				Reggio di Calabria	3	12	1036
ITG		Isole			1	12	1037
ITG1			Sicilia		2	12	1038
ITG11				Trapani	3	12	1039
ITG12				Palermo	3	12	1040
ITG13				Messina	3	12	1041
ITG14				Agrigento	3	12	1042
ITG15				Caltanissetta	3	12	1043
ITG16				Enna	3	12	1044
ITG17				Catania	3	12	1045
ITG18				Ragusa	3	12	1046
ITG19				Siracusa	3	12	1047
ITG2			Sardegna		2	12	1048
ITG2D				Sassari	3	12	1049
ITG2E				Nuoro	3	12	1050
ITG2F				Cagliari	3	12	1051
ITG2G				Oristano	3	12	1052
ITG2H				Sud Sardegna	3	12	1053
ITH		Nord-Est			1	12	1054
ITH1			Provincia Autonoma di Bolzano/Bozen		2	12	1055
ITH10				Bolzano-Bozen	3	12	1056
ITH2			Provincia Autonoma di Trento		2	12	1057
ITH20				Trento	3	12	1058
ITH3			Veneto		2	12	1059
ITH31				Verona	3	12	1060
ITH32				Vicenza	3	12	1061
ITH33				Belluno	3	12	1062
ITH34				Treviso	3	12	1063
ITH35				Venezia	3	12	1064
ITH36				Padova	3	12	1065
ITH37				Rovigo	3	12	1066
ITH4			Friuli-Venezia Giulia		2	12	1067
ITH41				Pordenone	3	12	1068
ITH42				Udine	3	12	1069
ITH43				Gorizia	3	12	1070
ITH44				Trieste	3	12	1071
ITH5			Emilia-Romagna		2	12	1072
ITH51				Piacenza	3	12	1073
ITH52				Parma	3	12	1074
ITH53				Reggio nell’Emilia	3	12	1075
ITH54				Modena	3	12	1076
ITH55				Bologna	3	12	1077
ITH56				Ferrara	3	12	1078
ITH57				Ravenna	3	12	1079
ITH58				Forlì-Cesena	3	12	1080
ITH59				Rimini	3	12	1081
ITI		Centro (IT)			1	12	1082
ITI1			Toscana		2	12	1083
ITI11				Massa-Carrara	3	12	1084
ITI12				Lucca	3	12	1085
ITI13				Pistoia	3	12	1086
ITI14				Firenze	3	12	1087
ITI15				Prato	3	12	1088
ITI16				Livorno	3	12	1089
ITI17				Pisa	3	12	1090
ITI18				Arezzo	3	12	1091
ITI19				Siena	3	12	1092
ITI1A				Grosseto	3	12	1093
ITI2			Umbria		2	12	1094
ITI21				Perugia	3	12	1095
ITI22				Terni	3	12	1096
ITI3			Marche		2	12	1097
ITI31				Pesaro e Urbino	3	12	1098
ITI32				Ancona	3	12	1099
ITI33				Macerata	3	12	1100
ITI34				Ascoli Piceno	3	12	1101
ITI35				Fermo	3	12	1102
ITI4			Lazio		2	12	1103
ITI41				Viterbo	3	12	1104
ITI42				Rieti	3	12	1105
ITI43				Roma	3	12	1106
ITI44				Latina	3	12	1107
ITI45				Frosinone	3	12	1108
ITZ		Extra-Regio NUTS 1			1	12	1109
ITZZ			Extra-Regio NUTS 2		2	12	1110
ITZZZ				Extra-Regio NUTS 3	3	12	1111
CY	Κύπρος				0	13	1112		CY	Kýpros
CY0		Κύπρος			1	13	1113		CY0	Kýpros
CY00			Κύπρος		2	13	1114		CY00		Kýpros
CY000				Κύπρος	3	13	1115		CY000			Kýpros
CYZ		Extra-Regio NUTS 1			1	13	1116		CYZ	EXTRA-REGIO NUTS 1
CYZZ			Extra-Regio NUTS 2		2	13	1117		CYZZ		Extra-Regio NUTS 2
CYZZZ				Extra-Regio NUTS 3	3	13	1118		CYZZZ			Extra-Regio NUTS 3
LV	Latvija				0	14	1119
LV0		Latvija			1	14	1120		The version in Latin characters is not official. It is included here only for the sake of comprehension.
LV00			Latvija		2	14	1121
LV003				Kurzeme	3	14	1122
LV005				Latgale	3	14	1123
LV006				Rīga	3	14	1124
LV007				Pierīga	3	14	1125
LV008				Vidzeme	3	14	1126
LV009				Zemgale	3	14	1127
LVZ		Extra-Regio NUTS 1			1	14	1128
LVZZ			Extra-Regio NUTS 2		2	14	1129
LVZZZ				Extra-Regio NUTS 3	3	14	1130
LT	Lietuva				0	15	1131
LT0		Lietuva			1	15	1132
LT01			Sostinės regionas		2	15	1133
LT011				Vilniaus apskritis	3	15	1134
LT02			Vidurio ir vakarų Lietuvos regionas		2	15	1135
LT021				Alytaus apskritis	3	15	1136
LT022				Kauno apskritis	3	15	1137
LT023				Klaipėdos apskritis	3	15	1138
LT024				Marijampolės apskritis	3	15	1139
LT025				Panevėžio apskritis	3	15	1140
LT026				Šiaulių apskritis	3	15	1141
LT027				Tauragės apskritis	3	15	1142
LT028				Telšių apskritis	3	15	1143
LT029				Utenos apskritis	3	15	1144
LTZ		Extra-Regio NUTS 1			1	15	1145
LTZZ			Extra-Regio NUTS 2		2	15	1146
LTZZZ				Extra-Regio NUTS 3	3	15	1147
LU	Luxembourg				0	16	1148
LU0		Luxembourg			1	16	1149
LU00			Luxembourg		2	16	1150
LU000				Luxembourg	3	16	1151
LUZ		Extra-Regio NUTS 1			1	16	1152
LUZZ			Extra-Regio NUTS 2		2	16	1153
LUZZZ				Extra-Regio NUTS 3	3	16	1154
HU	Magyarország				0	17	1155
HU1		Közép-Magyarország			1	17	1156
HU11			Budapest		2	17	1157
HU110				Budapest	3	17	1158
HU12			Pest		2	17	1159
HU120				Pest	3	17	1160
HU2		Dunántúl			1	17	1161
HU21			Közép-Dunántúl		2	17	1162
HU211				Fejér	3	17	1163
HU212				Komárom-Esztergom	3	17	1164
HU213				Veszprém	3	17	1165
HU22			Nyugat-Dunántúl		2	17	1166
HU221				Győr-Moson-Sopron	3	17	1167
HU222				Vas	3	17	1168
HU223				Zala	3	17	1169
HU23			Dél-Dunántúl		2	17	1170
HU231				Baranya	3	17	1171
HU232				Somogy	3	17	1172
HU233				Tolna	3	17	1173
HU3		Alföld és Észak			1	17	1174
HU31			Észak-Magyarország		2	17	1175
HU311				Borsod-Abaúj-Zemplén	3	17	1176
HU312				Heves	3	17	1177
HU313				Nógrád	3	17	1178
HU32			Észak-Alföld		2	17	1179
HU321				Hajdú-Bihar	3	17	1180
HU322				Jász-Nagykun-Szolnok	3	17	1181
HU323				Szabolcs-Szatmár-Bereg	3	17	1182
HU33			Dél-Alföld		2	17	1183
HU331				Bács-Kiskun	3	17	1184
HU332				Békés	3	17	1185
HU333				Csongrád	3	17	1186
HUZ		Extra-Regio NUTS 1			1	17	1187
HUZZ			Extra-Regio NUTS 2		2	17	1188
HUZZZ				Extra-Regio NUTS 3	3	17	1189
MT	Malta				0	18	1190
MT0		Malta			1	18	1191
MT00			Malta		2	18	1192
MT001				Malta	3	18	1193
MT002				Gozo and Comino/Għawdex u Kemmuna	3	18	1194
MTZ		Extra-Regio NUTS 1			1	18	1195
MTZZ			Extra-Regio NUTS 2		2	18	1196
MTZZZ				Extra-Regio NUTS 3	3	18	1197
NL	Nederland				0	19	1198
NL1		Noord-Nederland			1	19	1199
NL11			Groningen		2	19	1200
NL111				Oost-Groningen	3	19	1201
NL112				Delfzijl en omgeving	3	19	1202
NL113				Overig Groningen	3	19	1203
NL12			Friesland (NL)		2	19	1204
NL124				Noord-Friesland	3	19	1205
NL125				Zuidwest-Friesland	3	19	1206
NL126				Zuidoost-Friesland	3	19	1207
NL13			Drenthe		2	19	1208
NL131				Noord-Drenthe	3	19	1209
NL132				Zuidoost-Drenthe	3	19	1210
NL133				Zuidwest-Drenthe	3	19	1211
NL2		Oost-Nederland			1	19	1212
NL21			Overijssel		2	19	1213
NL211				Noord-Overijssel	3	19	1214
NL212				Zuidwest-Overijssel	3	19	1215
NL213				Twente	3	19	1216
NL22			Gelderland		2	19	1217
NL221				Veluwe	3	19	1218
NL224				Zuidwest-Gelderland	3	19	1219
NL225				Achterhoek	3	19	1220
NL226				Arnhem/Nijmegen	3	19	1221
NL23			Flevoland		2	19	1222
NL230				Flevoland	3	19	1223
NL3		West-Nederland			1	19	1224
NL31			Utrecht		2	19	1225
NL310				Utrecht	3	19	1226
NL32			Noord-Holland		2	19	1227
NL321				Kop van Noord-Holland	3	19	1228
NL323				IJmond	3	19	1229
NL324				Agglomeratie Haarlem	3	19	1230
NL325				Zaanstreek	3	19	1231
NL327				Het Gooi en Vechtstreek	3	19	1232
NL328				Alkmaar en omgeving	3	19	1233
NL329				Groot-Amsterdam	3	19	1234
NL33			Zuid-Holland		2	19	1235
NL332				Agglomeratie ’s-Gravenhage	3	19	1236
NL333				Delft en Westland	3	19	1237
NL337				Agglomeratie Leiden en Bollenstreek	3	19	1238
NL33A				Zuidoost-Zuid-Holland	3	19	1239
NL33B				Oost-Zuid-Holland	3	19	1240
NL33C				Groot-Rijnmond	3	19	1241
NL34			Zeeland		2	19	1242
NL341				Zeeuwsch-Vlaanderen	3	19	1243
NL342				Overig Zeeland	3	19	1244
NL4		Zuid-Nederland			1	19	1245
NL41			Noord-Brabant		2	19	1246
NL411				West-Noord-Brabant	3	19	1247
NL412				Midden-Noord-Brabant	3	19	1248
NL413				Noordoost-Noord-Brabant	3	19	1249
NL414				Zuidoost-Noord-Brabant	3	19	1250
NL42			Limburg (NL)		2	19	1251
NL421				Noord-Limburg	3	19	1252
NL422				Midden-Limburg	3	19	1253
NL423				Zuid-Limburg	3	19	1254
NLZ		Extra-Regio NUTS 1			1	19	1255
NLZZ			Extra-Regio NUTS 2		2	19	1256
NLZZZ				Extra-Regio NUTS 3	3	19	1257
AT	Österreich				0	20	1258
AT1		Ostösterreich			1	20	1259
AT11			Burgenland		2	20	1260
AT111				Mittelburgenland	3	20	1261
AT112				Nordburgenland	3	20	1262
AT113				Südburgenland	3	20	1263
AT12			Niederösterreich		2	20	1264
AT121				Mostviertel-Eisenwurzen	3	20	1265
AT122				Niederösterreich-Süd	3	20	1266
AT123				Sankt Pölten	3	20	1267
AT124				Waldviertel	3	20	1268
AT125				Weinviertel	3	20	1269
AT126				Wiener Umland/Nordteil	3	20	1270
AT127				Wiener Umland/Südteil	3	20	1271
AT13			Wien		2	20	1272
AT130				Wien	3	20	1273
AT2		Südösterreich			1	20	1274
AT21			Kärnten		2	20	1275
AT211				Klagenfurt-Villach	3	20	1276
AT212				Oberkärnten	3	20	1277
AT213				Unterkärnten	3	20	1278
AT22			Steiermark		2	20	1279
AT221				Graz	3	20	1280
AT222				Liezen	3	20	1281
AT223				Östliche Obersteiermark	3	20	1282
AT224				Oststeiermark	3	20	1283
AT225				West- und Südsteiermark	3	20	1284
AT226				Westliche Obersteiermark	3	20	1285
AT3		Westösterreich			1	20	1286
AT31			Oberösterreich		2	20	1287
AT311				Innviertel	3	20	1288
AT312				Linz-Wels	3	20	1289
AT313				Mühlviertel	3	20	1290
AT314				Steyr-Kirchdorf	3	20	1291
AT315				Traunviertel	3	20	1292
AT32			Salzburg		2	20	1293
AT321				Lungau	3	20	1294
AT322				Pinzgau-Pongau	3	20	1295
AT323				Salzburg und Umgebung	3	20	1296
AT33			Tirol		2	20	1297
AT331				Außerfern	3	20	1298
AT332				Innsbruck	3	20	1299
AT333				Osttirol	3	20	1300
AT334				Tiroler Oberland	3	20	1301
AT335				Tiroler Unterland	3	20	1302
AT34			Vorarlberg		2	20	1303
AT341				Bludenz-Bregenzer Wald	3	20	1304
AT342				Rheintal-Bodenseegebiet	3	20	1305
ATZ		Extra-Regio NUTS 1			1	20	1306
ATZZ			Extra-Regio NUTS 2		2	20	1307
ATZZZ				Extra-Regio NUTS 3	3	20	1308
PL	Polska				0	21	1309
PL2		Makroregion południowy			1	21	1310
PL21			Małopolskie		2	21	1311
PL213				Miasto Kraków	3	21	1312
PL214				Krakowski	3	21	1313
PL217				Tarnowski	3	21	1314
PL218				Nowosądecki	3	21	1315
PL219				Nowotarski	3	21	1316
PL21A				Oświęcimski	3	21	1317
PL22			Śląskie		2	21	1318
PL224				Częstochowski	3	21	1319
PL225				Bielski	3	21	1320
PL227				Rybnicki	3	21	1321
PL228				Bytomski	3	21	1322
PL229				Gliwicki	3	21	1323
PL22A				Katowicki	3	21	1324
PL22B				Sosnowiecki	3	21	1325
PL22C				Tyski	3	21	1326
PL4		Makroregion północno-zachodni			1	21	1327
PL41			Wielkopolskie		2	21	1328
PL411				Pilski	3	21	1329
PL414				Koniński	3	21	1330
PL415				Miasto Poznań	3	21	1331
PL416				Kaliski	3	21	1332
PL417				Leszczyński	3	21	1333
PL418				Poznański	3	21	1334
PL42			Zachodniopomorskie		2	21	1335
PL424				Miasto Szczecin	3	21	1336
PL426				Koszaliński	3	21	1337
PL427				Szczecinecko-pyrzycki	3	21	1338
PL428				Szczeciński	3	21	1339
PL43			Lubuskie		2	21	1340
PL431				Gorzowski	3	21	1341
PL432				Zielonogórski	3	21	1342
PL5		Makroregion południowo-zachodni			1	21	1343
PL51			Dolnośląskie		2	21	1344
PL514				Miasto Wrocław	3	21	1345
PL515				Jeleniogórski	3	21	1346
PL516				Legnicko-głogowski	3	21	1347
PL517				Wałbrzyski	3	21	1348
PL518				Wrocławski	3	21	1349
PL52			Opolskie		2	21	1350
PL523				Nyski	3	21	1351
PL524				Opolski	3	21	1352
PL6		Makroregion północny			1	21	1353
PL61			Kujawsko-pomorskie		2	21	1354
PL613				Bydgosko-toruński	3	21	1355
PL616				Grudziądzki	3	21	1356
PL617				Inowrocławski	3	21	1357
PL618				Świecki	3	21	1358
PL619				Włocławski	3	21	1359
PL62			Warmińsko-mazurskie		2	21	1360
PL621				Elbląski	3	21	1361
PL622				Olsztyński	3	21	1362
PL623				Ełcki	3	21	1363
PL63			Pomorskie		2	21	1364
PL633				Trójmiejski	3	21	1365
PL634				Gdański	3	21	1366
PL636				Słupski	3	21	1367
PL637				Chojnicki	3	21	1368
PL638				Starogardzki	3	21	1369
PL7		Makroregion centralny			1	21	1370
PL71			Łódzkie		2	21	1371
PL711				Miasto Łódź	3	21	1372
PL712				Łódzki	3	21	1373
PL713				Piotrkowski	3	21	1374
PL714				Sieradzki	3	21	1375
PL715				Skierniewicki	3	21	1376
PL72			Świętokrzyskie		2	21	1377
PL721				Kielecki	3	21	1378
PL722				Sandomiersko-jędrzejowski	3	21	1379
PL8		Makroregion wschodni			1	21	1380
PL81			Lubelskie		2	21	1381
PL811				Bialski	3	21	1382
PL812				Chełmsko-zamojski	3	21	1383
PL814				Lubelski	3	21	1384
PL815				Puławski	3	21	1385
PL82			Podkarpackie		2	21	1386
PL821				Krośnieński	3	21	1387
PL822				Przemyski	3	21	1388
PL823				Rzeszowski	3	21	1389
PL824				Tarnobrzeski	3	21	1390
PL84			Podlaskie		2	21	1391
PL841				Białostocki	3	21	1392
PL842				Łomżyński	3	21	1393
PL843				Suwalski	3	21	1394
PL9		Makroregion województwo mazowieckie			1	21	1395
PL91			Warszawski stołeczny		2	21	1396
PL911				Miasto Warszawa	3	21	1397
PL912				Warszawski wschodni	3	21	1398
PL913				Warszawski zachodni	3	21	1399
PL92			Mazowiecki regionalny		2	21	1400
PL921				Radomski	3	21	1401
PL922				Ciechanowski	3	21	1402
PL923				Płocki	3	21	1403
PL924				Ostrołęcki	3	21	1404
PL925				Siedlecki	3	21	1405
PL926				Żyrardowski	3	21	1406
PLZ		Extra-Regio NUTS 1			1	21	1407
PLZZ			Extra-Regio NUTS 2		2	21	1408
PLZZZ				Extra-Regio NUTS 3	3	21	1409
PT	Portugal				0	22	1410
PT1		Continente			1	22	1411
PT11			Norte		2	22	1412
PT111				Alto Minho	3	22	1413
PT112				Cávado	3	22	1414
PT119				Ave	3	22	1415
PT11A				Área Metropolitana do Porto	3	22	1416
PT11B				Alto Tâmega	3	22	1417
PT11C				Tâmega e Sousa	3	22	1418
PT11D				Douro	3	22	1419
PT11E				Terras de Trás-os-Montes	3	22	1420
PT15			Algarve		2	22	1421
PT150				Algarve	3	22	1422
PT16			Centro (PT)		2	22	1423
PT16B				Oeste	3	22	1424
PT16D				Região de Aveiro	3	22	1425
PT16E				Região de Coimbra	3	22	1426
PT16F				Região de Leiria	3	22	1427
PT16G				Viseu Dão Lafões	3	22	1428
PT16H				Beira Baixa	3	22	1429
PT16I				Médio Tejo	3	22	1430
PT16J				Beiras e Serra da Estrela	3	22	1431
PT17			Área Metropolitana de Lisboa		2	22	1432
PT170				Área Metropolitana de Lisboa	3	22	1433
PT18			Alentejo		2	22	1434
PT181				Alentejo Litoral	3	22	1435
PT184				Baixo Alentejo	3	22	1436
PT185				Lezíria do Tejo	3	22	1437
PT186				Alto Alentejo	3	22	1438
PT187				Alentejo Central	3	22	1439
PT2		Região Autónoma dos Açores			1	22	1440
PT20			Região Autónoma dos Açores		2	22	1441
PT200				Região Autónoma dos Açores	3	22	1442
PT3		Região Autónoma da Madeira			1	22	1443
PT30			Região Autónoma da Madeira		2	22	1444
PT300				Região Autónoma da Madeira	3	22	1445
PTZ		Extra-Regio NUTS 1			1	22	1446
PTZZ			Extra-Regio NUTS 2		2	22	1447
PTZZZ				Extra-Regio NUTS 3	3	22	1448
RO	România				0	23	1449
RO1		Macroregiunea Unu			1	23	1450
RO11			Nord-Vest		2	23	1451
RO111				Bihor	3	23	1452
RO112				Bistriţa-Năsăud	3	23	1453
RO113				Cluj	3	23	1454
RO114				Maramureş	3	23	1455
RO115				Satu Mare	3	23	1456
RO116				Sălaj	3	23	1457
RO12			Centru		2	23	1458
RO121				Alba	3	23	1459
RO122				Braşov	3	23	1460
RO123				Covasna	3	23	1461
RO124				Harghita	3	23	1462
RO125				Mureş	3	23	1463
RO126				Sibiu	3	23	1464
RO2		Macroregiunea Doi			1	23	1465
RO21			Nord-Est		2	23	1466
RO211				Bacău	3	23	1467
RO212				Botoşani	3	23	1468
RO213				Iaşi	3	23	1469
RO214				Neamţ	3	23	1470
RO215				Suceava	3	23	1471
RO216				Vaslui	3	23	1472
RO22			Sud-Est		2	23	1473
RO221				Brăila	3	23	1474
RO222				Buzău	3	23	1475
RO223				Constanţa	3	23	1476
RO224				Galaţi	3	23	1477
RO225				Tulcea	3	23	1478
RO226				Vrancea	3	23	1479
RO3		Macroregiunea Trei			1	23	1480
RO31			Sud-Muntenia		2	23	1481
RO311				Argeş	3	23	1482
RO312				Călăraşi	3	23	1483
RO313				Dâmboviţa	3	23	1484
RO314				Giurgiu	3	23	1485
RO315				Ialomiţa	3	23	1486
RO316				Prahova	3	23	1487
RO317				Teleorman	3	23	1488
RO32			Bucureşti-Ilfov		2	23	1489
RO321				Bucureşti	3	23	1490
RO322				Ilfov	3	23	1491
RO4		Macroregiunea Patru			1	23	1492
RO41			Sud-Vest Oltenia		2	23	1493
RO411				Dolj	3	23	1494
RO412				Gorj	3	23	1495
RO413				Mehedinţi	3	23	1496
RO414				Olt	3	23	1497
RO415				Vâlcea	3	23	1498
RO42			Vest		2	23	1499
RO421				Arad	3	23	1500
RO422				Caraş-Severin	3	23	1501
RO423				Hunedoara	3	23	1502
RO424				Timiş	3	23	1503
ROZ		Extra-Regio NUTS 1			1	23	1504
ROZZ			Extra-Regio NUTS 2		2	23	1505
ROZZZ				Extra-Regio NUTS 3	3	23	1506
SI	Slovenija				0	24	1507
SI0		Slovenija			1	24	1508
SI03			Vzhodna Slovenija		2	24	1509
SI031				Pomurska	3	24	1510
SI032				Podravska	3	24	1511
SI033				Koroška	3	24	1512
SI034				Savinjska	3	24	1513
SI035				Zasavska	3	24	1514
SI036				Posavska	3	24	1515
SI037				Jugovzhodna Slovenija	3	24	1516
SI038				Primorsko-notranjska	3	24	1517
SI04			Zahodna Slovenija		2	24	1518
SI041				Osrednjeslovenska	3	24	1519
SI042				Gorenjska	3	24	1520
SI043				Goriška	3	24	1521
SI044				Obalno-kraška	3	24	1522
SIZ		Extra-Regio NUTS 1			1	24	1523
SIZZ			Extra-Regio NUTS 2		2	24	1524
SIZZZ				Extra-Regio NUTS 3	3	24	1525
SK	Slovensko				0	25	1526
SK0		Slovensko			1	25	1527
SK01			Bratislavský kraj		2	25	1528
SK010				Bratislavský kraj	3	25	1529
SK02			Západné Slovensko		2	25	1530
SK021				Trnavský kraj	3	25	1531
SK022				Trenčiansky kraj	3	25	1532
SK023				Nitriansky kraj	3	25	1533
SK03			Stredné Slovensko		2	25	1534
SK031				Žilinský kraj	3	25	1535
SK032				Banskobystrický kraj	3	25	1536
SK04			Východné Slovensko		2	25	1537
SK041				Prešovský kraj	3	25	1538
SK042				Košický kraj	3	25	1539
SKZ		Extra-Regio NUTS 1			1	25	1540
SKZZ			Extra-Regio NUTS 2		2	25	1541
SKZZZ				Extra-Regio NUTS 3	3	25	1542
FI	Suomi/Finland				0	26	1543
FI1		Manner-Suomi			1	26	1544
FI19			Länsi-Suomi		2	26	1545
FI193				Keski-Suomi	3	26	1546
FI194				Etelä-Pohjanmaa	3	26	1547
FI195				Pohjanmaa	3	26	1548
FI196				Satakunta	3	26	1549
FI197				Pirkanmaa	3	26	1550
FI1B			Helsinki-Uusimaa		2	26	1551
FI1B1				Helsinki-Uusimaa	3	26	1552
FI1C			Etelä-Suomi		2	26	1553
FI1C1				Varsinais-Suomi	3	26	1554
FI1C2				Kanta-Häme	3	26	1555
FI1C3				Päijät-Häme	3	26	1556
FI1C4				Kymenlaakso	3	26	1557
FI1C5				Etelä-Karjala	3	26	1558
FI1D			Pohjois- ja Itä-Suomi		2	26	1559
FI1D1				Etelä-Savo	3	26	1560
FI1D2				Pohjois-Savo	3	26	1561
FI1D3				Pohjois-Karjala	3	26	1562
FI1D5				Keski-Pohjanmaa	3	26	1563
FI1D7				Lappi	3	26	1564
FI1D8				Kainuu	3	26	1565
FI1D9				Pohjois-Pohjanmaa	3	26	1566
FI2		Åland			1	26	1567
FI20			Åland		2	26	1568
FI200				Åland	3	26	1569
FIZ		Extra-Regio NUTS 1			1	26	1570
FIZZ			Extra-Regio NUTS 2		2	26	1571
FIZZZ				Extra-Regio NUTS 3	3	26	1572
SE	Sverige				0	27	1573
SE1		Östra Sverige			1	27	1574
SE11			Stockholm		2	27	1575
SE110				Stockholms län	3	27	1576
SE12			Östra Mellansverige		2	27	1577
SE121				Uppsala län	3	27	1578
SE122				Södermanlands län	3	27	1579
SE123				Östergötlands län	3	27	1580
SE124				Örebro län	3	27	1581
SE125				Västmanlands län	3	27	1582
SE2		Södra Sverige			1	27	1583
SE21			Småland med öarna		2	27	1584
SE211				Jönköpings län	3	27	1585
SE212				Kronobergs län	3	27	1586
SE213				Kalmar län	3	27	1587
SE214				Gotlands län	3	27	1588
SE22			Sydsverige		2	27	1589
SE221				Blekinge län	3	27	1590
SE224				Skåne län	3	27	1591
SE23			Västsverige		2	27	1592
SE231				Hallands län	3	27	1593
SE232				Västra Götalands län	3	27	1594
SE3		Norra Sverige			1	27	1595
SE31			Norra Mellansverige		2	27	1596
SE311				Värmlands län	3	27	1597
SE312				Dalarnas län	3	27	1598
SE313				Gävleborgs län	3	27	1599
SE32			Mellersta Norrland		2	27	1600
SE321				Västernorrlands län	3	27	1601
SE322				Jämtlands län	3	27	1602
SE33			Övre Norrland		2	27	1603
SE331				Västerbottens län	3	27	1604
SE332				Norrbottens län	3	27	1605
SEZ		Extra-Regio NUTS 1			1	27	1606
SEZZ			Extra-Regio NUTS 2		2	27	1607
SEZZZ				Extra-Regio NUTS 3	3	27	1608
UK	United Kingdom				0	28	1609
UKC		North East (England)			1	28	1610
UKC1			Tees Valley and Durham		2	28	1611
UKC11				Hartlepool and Stockton-on-Tees	3	28	1612
UKC12				South Teesside	3	28	1613
UKC13				Darlington	3	28	1614
UKC14				Durham CC	3	28	1615
UKC2			Northumberland and Tyne and Wear		2	28	1616
UKC21				Northumberland	3	28	1617
UKC22				Tyneside	3	28	1618
UKC23				Sunderland	3	28	1619
UKD		North West (England)			1	28	1620
UKD1			Cumbria		2	28	1621
UKD11				West Cumbria	3	28	1622
UKD12				East Cumbria	3	28	1623
UKD3			Greater Manchester		2	28	1624
UKD33				Manchester	3	28	1625
UKD34				Greater Manchester South West	3	28	1626
UKD35				Greater Manchester South East	3	28	1627
UKD36				Greater Manchester North West	3	28	1628
UKD37				Greater Manchester North East	3	28	1629
UKD4			Lancashire		2	28	1630
UKD41				Blackburn with Darwen	3	28	1631
UKD42				Blackpool	3	28	1632
UKD44				Lancaster and Wyre	3	28	1633
UKD45				Mid Lancashire	3	28	1634
UKD46				East Lancashire	3	28	1635
UKD47				Chorley and West Lancashire	3	28	1636
UKD6			Cheshire		2	28	1637
UKD61				Warrington	3	28	1638
UKD62				Cheshire East	3	28	1639
UKD63				Cheshire West and Chester	3	28	1640
UKD7			Merseyside		2	28	1641
UKD71				East Merseyside	3	28	1642
UKD72				Liverpool	3	28	1643
UKD73				Sefton	3	28	1644
UKD74				Wirral	3	28	1645
UKE		Yorkshire and the Humber			1	28	1646
UKE1			East Yorkshire and Northern Lincolnshire		2	28	1647
UKE11				Kingston upon Hull, City of	3	28	1648
UKE12				East Riding of Yorkshire	3	28	1649
UKE13				North and North East Lincolnshire	3	28	1650
UKE2			North Yorkshire		2	28	1651
UKE21				York	3	28	1652
UKE22				North Yorkshire CC	3	28	1653
UKE3			South Yorkshire		2	28	1654
UKE31				Barnsley, Doncaster and Rotherham	3	28	1655
UKE32				Sheffield	3	28	1656
UKE4			West Yorkshire		2	28	1657
UKE41				Bradford	3	28	1658
UKE42				Leeds	3	28	1659
UKE44				Calderdale and Kirklees	3	28	1660
UKE45				Wakefield	3	28	1661
UKF		East Midlands (England)			1	28	1662
UKF1			Derbyshire and Nottinghamshire		2	28	1663
UKF11				Derby	3	28	1664
UKF12				East Derbyshire	3	28	1665
UKF13				South and West Derbyshire	3	28	1666
UKF14				Nottingham	3	28	1667
UKF15				North Nottinghamshire	3	28	1668
UKF16				South Nottinghamshire	3	28	1669
UKF2			Leicestershire, Rutland and Northamptonshire		2	28	1670
UKF21				Leicester	3	28	1671
UKF22				Leicestershire CC and Rutland	3	28	1672
UKF24				West Northamptonshire	3	28	1673
UKF25				North Northamptonshire	3	28	1674
UKF3			Lincolnshire		2	28	1675
UKF30				Lincolnshire	3	28	1676
UKG		West Midlands (England)			1	28	1677
UKG1			Herefordshire, Worcestershire and Warwickshire		2	28	1678
UKG11				Herefordshire, County of	3	28	1679
UKG12				Worcestershire	3	28	1680
UKG13				Warwickshire	3	28	1681
UKG2			Shropshire and Staffordshire		2	28	1682
UKG21				Telford and Wrekin	3	28	1683
UKG22				Shropshire CC	3	28	1684
UKG23				Stoke-on-Trent	3	28	1685
UKG24				Staffordshire CC	3	28	1686
UKG3			West Midlands		2	28	1687
UKG31				Birmingham	3	28	1688
UKG32				Solihull	3	28	1689
UKG33				Coventry	3	28	1690
UKG36				Dudley	3	28	1691
UKG37				Sandwell	3	28	1692
UKG38				Walsall	3	28	1693
UKG39				Wolverhampton	3	28	1694
UKH		East of England			1	28	1695
UKH1			East Anglia		2	28	1696
UKH11				Peterborough	3	28	1697
UKH12				Cambridgeshire CC	3	28	1698
UKH14				Suffolk	3	28	1699
UKH15				Norwich and East Norfolk	3	28	1700
UKH16				North and West Norfolk	3	28	1701
UKH17				Breckland and South Norfolk	3	28	1702
UKH2			Bedfordshire and Hertfordshire		2	28	1703
UKH21				Luton	3	28	1704
UKH23				Hertfordshire	3	28	1705
UKH24				Bedford	3	28	1706
UKH25				Central Bedfordshire	3	28	1707
UKH3			Essex		2	28	1708
UKH31				Southend-on-Sea	3	28	1709
UKH32				Thurrock	3	28	1710
UKH34				Essex Haven Gateway	3	28	1711
UKH35				West Essex	3	28	1712
UKH36				Heart of Essex	3	28	1713
UKH37				Essex Thames Gateway	3	28	1714
UKI		London			1	28	1715
UKI3			Inner London — West		2	28	1716
UKI31				Camden and City of London	3	28	1717
UKI32				Westminster	3	28	1718
UKI33				Kensington & Chelsea and Hammersmith & Fulham	3	28	1719
UKI34				Wandsworth	3	28	1720
UKI4			Inner London — East		2	28	1721
UKI41				Hackney and Newham	3	28	1722
UKI42				Tower Hamlets	3	28	1723
UKI43				Haringey and Islington	3	28	1724
UKI44				Lewisham and Southwark	3	28	1725
UKI45				Lambeth	3	28	1726
UKI5			Outer London — East and North East		2	28	1727
UKI51				Bexley and Greenwich	3	28	1728
UKI52				Barking & Dagenham and Havering	3	28	1729
UKI53				Redbridge and Waltham Forest	3	28	1730
UKI54				Enfield	3	28	1731
UKI6			Outer London — South		2	28	1732
UKI61				Bromley	3	28	1733
UKI62				Croydon	3	28	1734
UKI63				Merton, Kingston upon Thames and Sutton	3	28	1735
UKI7			Outer London — West and North West		2	28	1736
UKI71				Barnet	3	28	1737
UKI72				Brent	3	28	1738
UKI73				Ealing	3	28	1739
UKI74				Harrow and Hillingdon	3	28	1740
UKI75				Hounslow and Richmond upon Thames	3	28	1741
UKJ		South East (England)			1	28	1742
UKJ1			Berkshire, Buckinghamshire and Oxfordshire		2	28	1743
UKJ11				Berkshire	3	28	1744
UKJ12				Milton Keynes	3	28	1745
UKJ13				Buckinghamshire CC	3	28	1746
UKJ14				Oxfordshire	3	28	1747
UKJ2			Surrey, East and West Sussex		2	28	1748
UKJ21				Brighton and Hove	3	28	1749
UKJ22				East Sussex CC	3	28	1750
UKJ25				West Surrey	3	28	1751
UKJ26				East Surrey	3	28	1752
UKJ27				West Sussex (South West)	3	28	1753
UKJ28				West Sussex (North East)	3	28	1754
UKJ3			Hampshire and Isle of Wight		2	28	1755
UKJ31				Portsmouth	3	28	1756
UKJ32				Southampton	3	28	1757
UKJ34				Isle of Wight	3	28	1758
UKJ35				South Hampshire	3	28	1759
UKJ36				Central Hampshire	3	28	1760
UKJ37				North Hampshire	3	28	1761
UKJ4			Kent		2	28	1762
UKJ41				Medway	3	28	1763
UKJ43				Kent Thames Gateway	3	28	1764
UKJ44				East Kent	3	28	1765
UKJ45				Mid Kent	3	28	1766
UKJ46				West Kent	3	28	1767
UKK		South West (England)			1	28	1768
UKK1			Gloucestershire, Wiltshire and Bristol/Bath area		2	28	1769
UKK11				Bristol, City of	3	28	1770
UKK12				Bath and North East Somerset, North Somerset and South Gloucestershire	3	28	1771
UKK13				Gloucestershire	3	28	1772
UKK14				Swindon	3	28	1773
UKK15				Wiltshire CC	3	28	1774
UKK2			Dorset and Somerset		2	28	1775
UKK23				Somerset	3	28	1776
UKK24				Bournemouth, Christchurch and Poole	3	28	1777
UKK25				Dorset	3	28	1778
UKK3			Cornwall and Isles of Scilly		2	28	1779
UKK30				Cornwall and Isles of Scilly	3	28	1780
UKK4			Devon		2	28	1781
UKK41				Plymouth	3	28	1782
UKK42				Torbay	3	28	1783
UKK43				Devon CC	3	28	1784
UKL		Wales			1	28	1785
UKL1			West Wales and The Valleys		2	28	1786
UKL11				Isle of Anglesey	3	28	1787
UKL12				Gwynedd	3	28	1788
UKL13				Conwy and Denbighshire	3	28	1789
UKL14				South West Wales	3	28	1790
UKL15				Central Valleys	3	28	1791
UKL16				Gwent Valleys	3	28	1792
UKL17				Bridgend and Neath Port Talbot	3	28	1793
UKL18				Swansea	3	28	1794
UKL2			East Wales		2	28	1795
UKL21				Monmouthshire and Newport	3	28	1796
UKL22				Cardiff and Vale of Glamorgan	3	28	1797
UKL23				Flintshire and Wrexham	3	28	1798
UKL24				Powys	3	28	1799
UKM		Scotland			1	28	1800
UKM5			North Eastern Scotland		2	28	1801
UKM50				Aberdeen City and Aberdeenshire	3	28	1802
UKM6			Highlands and Islands		2	28	1803
UKM61				Caithness & Sutherland and Ross & Cromarty	3	28	1804
UKM62				Inverness & Nairn and Moray, Badenoch & Strathspey	3	28	1805
UKM63				Lochaber, Skye & Lochalsh, Arran & Cumbrae and Argyll & Bute	3	28	1806
UKM64				Na h-Eileanan Siar (Western Isles)	3	28	1807
UKM65				Orkney Islands	3	28	1808
UKM66				Shetland Islands	3	28	1809
UKM7			Eastern Scotland		2	28	1810
UKM71				Angus and Dundee City	3	28	1811
UKM72				Clackmannanshire and Fife	3	28	1812
UKM73				East Lothian and Midlothian	3	28	1813
UKM75				Edinburgh, City of	3	28	1814
UKM76				Falkirk	3	28	1815
UKM77				Perth & Kinross and Stirling	3	28	1816
UKM78				West Lothian	3	28	1817
UKM8			West Central Scotland		2	28	1818
UKM81				East Dunbartonshire, West Dunbartonshire and Helensburgh & Lomond	3	28	1819
UKM82				Glasgow City	3	28	1820
UKM83				Inverclyde, East Renfrewshire and Renfrewshire	3	28	1821
UKM84				North Lanarkshire	3	28	1822
UKM9			Southern Scotland		2	28	1823
UKM91				Scottish Borders	3	28	1824
UKM92				Dumfries & Galloway	3	28	1825
UKM93				East Ayrshire and North Ayrshire mainland	3	28	1826
UKM94				South Ayrshire	3	28	1827
UKM95				South Lanarkshire	3	28	1828
UKN		Northern Ireland			1	28	1829
UKN0			Northern Ireland		2	28	1830
UKN06				Belfast	3	28	1831
UKN07				Armagh City, Banbridge and Craigavon	3	28	1832
UKN08				Newry, Mourne and Down	3	28	1833
UKN09				Ards and North Down	3	28	1834
UKN0A				Derry City and Strabane	3	28	1835
UKN0B				Mid Ulster	3	28	1836
UKN0C				Causeway Coast and Glens	3	28	1837
UKN0D				Antrim and Newtownabbey	3	28	1838
UKN0E				Lisburn and Castlereagh	3	28	1839
UKN0F				Mid and East Antrim	3	28	1840
UKN0G				Fermanagh and Omagh	3	28	1841
UKZ		Extra-Regio NUTS 1			1	28	1842
UKZZ			Extra-Regio NUTS 2		2	28	1843
UKZZZ				Extra-Regio NUTS 3	3	28	1844
Statistical regions (EFTA countries, candidate countries, potential candidates, other partners (Eastern Partnership etc.):
IS	Ísland				0	29	1845
IS0		Ísland			1	29	1846
IS00			Ísland		2	29	1847
IS001				Höfuðborgarsvæði	3	29	1848
IS002				Landsbyggð	3	29	1849
ISZ		Extra-Regio NUTS 1			1	29	1850
ISZZ			Extra-Regio NUTS 2		2	29	1851
ISZZZ				Extra-Regio NUTS 3	3	29	1852
LI	Liechtenstein				0	30	1853
LI0		Liechtenstein			1	30	1854
LI00			Liechtenstein		2	30	1855
LI000				Liechtenstein	3	30	1856
LIZ		Extra-Regio NUTS 1			1	30	1857
LIZZ			Extra-Regio NUTS 2		2	30	1858
LIZZZ				Extra-Regio NUTS 3	3	30	1859
NO	Norge				0	31	1860
NO0		Norge			1	31	1861
NO02			Innlandet		2	31	1862
NO020				Innlandet	3	31	1863
NO06			Trøndelag		2	31	1864
NO060				Trøndelag	3	31	1865
NO07			Nord-Norge		2	31	1866
NO071				Nordland	3	31	1867
NO074				Troms og Finnmark	3	31	1868
NO08			Oslo og Viken		2	31	1869
NO081				Oslo	3	31	1870
NO082				Viken	3	31	1871
NO09			Agder og Sør-Østlandet		2	31	1872
NO091				Vestfold og Telemark	3	31	1873
NO092				Agder	3	31	1874
NO0A			Vestlandet		2	31	1875
NO0A1				Rogaland	3	31	1876
NO0A2				Vestland	3	31	1877
NO0A3				Møre og Romsdal	3	31	1878
NO0B			Svalbard og Jan Mayen		2	31	1879
NO0B1				Jan Mayen	3	31	1880
NO0B2				Svalbard	3	31	1881
NOZ		Extra-Regio NUTS 1			1	31	1882
NOZZ			Extra-Regio NUTS 2		2	31	1883
NOZZZ				Extra-Regio NUTS 3	3	31	1884
CH	Schweiz/Suisse/Svizzera				0	32	1885
CH0		Schweiz/Suisse/Svizzera			1	32	1886
CH01			Région lémanique		2	32	1887
CH011				Vaud	3	32	1888
CH012				Valais / Wallis	3	32	1889
CH013				Genève	3	32	1890
CH02			Espace Mittelland		2	32	1891
CH021				Bern / Berne	3	32	1892
CH022				Fribourg / Freiburg	3	32	1893
CH023				Solothurn	3	32	1894
CH024				Neuchâtel	3	32	1895
CH025				Jura	3	32	1896
CH03			Nordwestschweiz		2	32	1897
CH031				Basel-Stadt	3	32	1898
CH032				Basel-Landschaft	3	32	1899
CH033				Aargau	3	32	1900
CH04			Zürich		2	32	1901
CH040				Zürich	3	32	1902
CH05			Ostschweiz		2	32	1903
CH051				Glarus	3	32	1904
CH052				Schaffhausen	3	32	1905
CH053				Appenzell Ausserrhoden	3	32	1906
CH054				Appenzell Innerrhoden	3	32	1907
CH055				St. Gallen	3	32	1908
CH056				Graubünden / Grigioni / Grischun	3	32	1909
CH057				Thurgau	3	32	1910
CH06			Zentralschweiz		2	32	1911
CH061				Luzern	3	32	1912
CH062				Uri	3	32	1913
CH063				Schwyz	3	32	1914
CH064				Obwalden	3	32	1915
CH065				Nidwalden	3	32	1916
CH066				Zug	3	32	1917
CH07			Ticino		2	32	1918
CH070				Ticino	3	32	1919
CHZ		Extra-Regio NUTS 1			1	32	1920
CHZZ			Extra-Regio NUTS 2		2	32	1921
CHZZZ				Extra-Regio NUTS 3	3	32	1922
ME	Црна Гора				0	33	1923		ME	Crna Gora
ME0		Црна Гора			1	33	1924		ME0	Crna Gora
ME00			Црна Гора		2	33	1925		ME00		Crna Gora
ME000				Црна Гора	3	33	1926		ME000			Crna Gora
MEZ		Extra-Regio NUTS 1			1	33	1927		MEZ	Extra-Regio NUTS 1
MEZZ			Extra-Regio NUTS 2		2	33	1928		MEZZ		Extra-Regio NUTS 2
MEZZZ				Extra-Regio NUTS 3	3	33	1929		MEZZZ			Extra-Regio NUTS 3
MK	Северна Македонија				0	34	1930		MK	Severna Makedonija
MK0		Северна Македонија			1	34	1931		MK0		Severna Makedonija
MK00			Северна Македонија		2	34	1932		MK00			Severna Makedonija
MK001				Вардарски	3	34	1933		MK001				Vardarski
MK002				Источен	3	34	1934		MK002				Istočen
MK003				Југозападен	3	34	1935		MK003				Jugozapaden
MK004				Југоисточен	3	34	1936		MK004				Jugoistočen
MK005				Пелагониски	3	34	1937		MK005				Pelagoniski
MK006				Полошки	3	34	1938		MK006				Pološki
MK007				Североисточен	3	34	1939		MK007				Severoistočen
MK008				Скопски	3	34	1940		MK008				Skopski
MKZ		Extra-Regio NUTS 1			1	34	1941		MKZ		Extra-Regio NUTS 1
MKZZ			Extra-Regio NUTS 2		2	34	1942		MKZZ			Extra-Regio NUTS 2
MKZZZ				Extra-Regio NUTS 3	3	34	1943		MKZZZ				Extra-Regio NUTS 3
AL	Shqipëria				0	35	1944
AL0		Shqipëria			1	35	1945		The versions in Latin characters is not official. It is included here only for the sake of comprehension.
AL01			Veri		2	35	1946
AL011				Dibër	3	35	1947
AL012				Durrës	3	35	1948
AL013				Kukës	3	35	1949
AL014				Lezhë	3	35	1950
AL015				Shkodër	3	35	1951
AL02			Qender		2	35	1952
AL021				Elbasan	3	35	1953
AL022				Tiranë	3	35	1954
AL03			Jug		2	35	1955
AL031				Berat	3	35	1956
AL032				Fier	3	35	1957
AL033				Gjirokastër	3	35	1958
AL034				Korcë	3	35	1959
AL035				Vlorë	3	35	1960
ALZ		Extra-Regio NUTS 1			1	35	1961
ALZZ			Extra-Regio NUTS 2		2	35	1962
ALZZZ				Extra-Regio NUTS 3	3	35	1963
RS	Srbija/Сpбија				0	36	1964		RS	Serbia
RS1		Србија - север			1	36	1965		RS1	Serbia - sever
RS11			Београдски регион		2	36	1966		RS11		City of Belgrade
RS110				Београдска област	3	36	1967		RS110			City of Belgrade
RS12			Регион Војводине		2	36	1968		RS12		Autonomous Province of Vojvodina
RS121				Западнобачка област	3	36	1969		RS121			Zapadnobačka oblast
RS122				Јужнобанатска област	3	36	1970		RS122			Južnobanatska oblast
RS123				Јужнобачка област	3	36	1971		RS123			Južnobačka oblast
RS124				Севернобанатска област	3	36	1972		RS124			Severnobanatska oblast
RS125				Севернобачка област	3	36	1973		RS125			Severnobačka oblast
RS126				Средњобанатска област	3	36	1974		RS126			Srednjobanatska oblast
RS127				Сремска област	3	36	1975		RS127			Sremska oblast
RS2		Србија - југ			1	36	1976		RS2	Serbia - jug
RS21			Регион Шумадије и Западне Србије		2	36	1977		RS21		Region Šumadije i Zapadne Srbije
RS211				Златиборска област	3	36	1978		RS211			Zlatiborska oblast
RS212				Колубарска област	3	36	1979		RS212			Kolubarska oblast
RS213				Мачванска област	3	36	1980		RS213			Mačvanska oblast
RS214				Моравичка област	3	36	1981		RS214			Moravička oblast
RS215				Поморавска област	3	36	1982		RS215			Pomoravska oblast
RS216				Расинска област	3	36	1983		RS216			Rasinska oblast
RS217				Рашка област	3	36	1984		RS217			Raška oblast
RS218				Шумадијска област	3	36	1985		RS218			Šumadijska oblast
RS22			Регион Јужне и Источне Србије		2	36	1986		RS22		Region Južne i Istočne Srbije
RS221				Борска област	3	36	1987		RS221			Borska oblast
RS222				Браничевска област	3	36	1988		RS222			Braničevska oblast
RS223				Зајечарска област	3	36	1989		RS223			Zaječarska oblast
RS224				Јабланичка област	3	36	1990		RS224			Jablanička oblast
RS225				Нишавска област	3	36	1991		RS225			Nišavska oblast
RS226				Пиротска област	3	36	1992		RS226			Pirotska oblast
RS227				Подунавска област	3	36	1993		RS227			Podunavska oblast
RS228				Пчињска област	3	36	1994		RS228			Pčinjska oblast
RS229				Топличка област	3	36	1995		RS229			Toplička oblast
RSZ		Extra-Regio NUTS 1			1	36	1996		RSZ	Extra-Regio NUTS 1
RSZZ			Extra-Regio NUTS 2		2	36	1997		RSZZ		Extra-Regio NUTS 2
RSZZZ				Extra-Regio NUTS 3	3	36	1998		RSZZZ			Extra-Regio NUTS 3
[truncated: 123 more rows]

## Sheet: Changes overview NUTS 2016-2021
	Changes from NUTS 2016 to NUTS 2021, overview
	Country	NUTS 1	NUTS 2	NUTS 3
	BE	one region name slightly changed		NUTS 3 regions of BE32 modified (2 suppressed, 2 newly created, 4 boundary changes)
	CZ	name "Česká republika" changed into "Česko"
	EE			EE006 and EE007 recoded into EE009 and EE00A (boundary changes)
	ES		several region names changed
	FR	several region names updated
	HR		one region (HR03) discontinued, three new created	NUTS 3 regions of ex-HR03 rearranged to newly created NUTS 2 regions
	IT			Sardinia (ITG2) rearranged: 4 regions discontinued, 4 with boundary changes, 1 newly created
	UK			UKK21 and 22 recoded and renamed due to boundary change, UKN10-UKN16 recoded into UKN0A-UKN0G
	all	new spelling of NUTS 1 names: instead of capital letters only now in normal writing language
	NO		7 regions modified into 6, large revamp; 1 new	18 regions modified into 11, large revamp; 2 new

## Sheet: Changes detailed NUTS 2016-2021
Code 2016	Code 2021	Country	NUTS level 1 (italics: NUTS 2016 else NUTS 2021)	NUTS level 2 (italics: NUTS 2016 else NUTS 2021)	NUTS level 3 (italics: NUTS 2016 else NUTS 2021)	Change codes*	Change comments	NUTS level	Country order	Region order (NUTS 2016)	Region order (NUTS 2021)			* Change codes:
BE	BE	Belgique/België						0	1	1	1			1: renamed
BE1	BE1		Région de Bruxelles-Capitale/Brussels Hoofdstedelijk Gewest					1	1	2	2			2: recoded
BE10	BE10			Région de Bruxelles-Capitale/ Brussels Hoofdstedelijk Gewest				2	1	3	3			3: boundary change, recode
BE100	BE100				Arr. de Bruxelles-Capitale/Arr. Brussel-Hoofdstad	1	renamed	3	1	4	4			4: boundary change, recode, rename
BE2	BE2		Vlaams Gewest					1	1	5	5			5: discontinued
BE21	BE21			Prov. Antwerpen				2	1	6	6			6: new
BE211	BE211				Arr. Antwerpen			3	1	7	7
BE212	BE212				Arr. Mechelen			3	1	8	8
BE213	BE213				Arr. Turnhout			3	1	9	9
BE22	BE22			Prov. Limburg (BE)				2	1	10	10
BE223	BE223				Arr. Tongeren			3	1	13	11
BE221	BE224				Arr. Hasselt	3	boundary change, recode	3	1	11	12
BE222	BE225				Arr. Maaseik	3	boundary change, recode	3	1	12	13
BE23	BE23			Prov. Oost-Vlaanderen				2	1	14	14
BE231	BE231				Arr. Aalst			3	1	15	15
BE232	BE232				Arr. Dendermonde			3	1	16	16
BE233	BE233				Arr. Eeklo			3	1	17	17
BE234	BE234				Arr. Gent			3	1	18	18
BE235	BE235				Arr. Oudenaarde			3	1	19	19
BE236	BE236				Arr. Sint-Niklaas			3	1	20	20
BE24	BE24			Prov. Vlaams-Brabant				2	1	21	21
BE241	BE241				Arr. Halle-Vilvoorde			3	1	22	22
BE242	BE242				Arr. Leuven			3	1	23	23
BE25	BE25			Prov. West-Vlaanderen				2	1	24	24
BE251	BE251				Arr. Brugge			3	1	25	25
BE252	BE252				Arr. Diksmuide			3	1	26	26
BE253	BE253				Arr. Ieper			3	1	27	27
BE254	BE254				Arr. Kortrijk			3	1	28	28
BE255	BE255				Arr. Oostende			3	1	29	29
BE256	BE256				Arr. Roeselare			3	1	30	30
BE257	BE257				Arr. Tielt			3	1	31	31
BE258	BE258				Arr. Veurne			3	1	32	32
BE3	BE3		Région wallonne			1	renamed	1	1	33	33
BE31	BE31			Prov. Brabant Wallon				2	1	34	34
BE310	BE310				Arr. Nivelles			3	1	35	35
BE32	BE32			Prov. Hainaut				2	1	36	36
BE323	BE323				Arr. Mons			3	1	39	37
BE324					Arr. Mouscron	5	discontinued; merged with ex-BE327	3	1	40
BE327					Arr. Tournai	5	discontinued; merged with ex-BE324	3	1	43
	BE328				Arr. Tournai-Mouscron	6	new; merge of ex-BE327 and BE324				38
	BE329				Arr. La Louvière	6	new; made from parts of ex-BE321, BE322, BE325, BE326				39
BE321	BE32A				Arr. Ath	3	boundary change, recode	3	1	37	40
BE322	BE32B				Arr. Charleroi	3	boundary change, recode	3	1	38	41
BE325	BE32C				Arr. Soignies	3	boundary change, recode	3	1	41	42
BE326	BE32D				Arr. Thuin	3	boundary change, recode	3	1	42	43
BE33	BE33			Prov. Liège				2	1	44	44
BE331	BE331				Arr. Huy			3	1	45	45
BE332	BE332				Arr. Liège			3	1	46	46
BE334	BE334				Arr. Waremme			3	1	47	47
BE335	BE335				Arr. Verviers — communes francophones			3	1	48	48
BE336	BE336				Bezirk Verviers — Deutschsprachige Gemeinschaft			3	1	49	49
BE34	BE34			Prov. Luxembourg (BE)				2	1	50	50
BE341	BE341				Arr. Arlon			3	1	51	51
BE342	BE342				Arr. Bastogne			3	1	52	52
BE343	BE343				Arr. Marche-en-Famenne			3	1	53	53
BE344	BE344				Arr. Neufchâteau			3	1	54	54
BE345	BE345				Arr. Virton			3	1	55	55
BE35	BE35			Prov. Namur				2	1	56	56
BE351	BE351				Arr. Dinant			3	1	57	57
BE352	BE352				Arr. Namur			3	1	58	58
BE353	BE353				Arr. Philippeville			3	1	59	59
BEZ	BEZ		Extra-Regio NUTS 1					1	1	60	60
BEZZ	BEZZ			Extra-Regio NUTS 2				2	1	61	61
BEZZZ	BEZZZ				Extra-Regio NUTS 3			3	1	62	62
BG	BG	България						0	2	63	63
BG3	BG3		Северна и югоизточна България					1	2	64	64
BG31	BG31			Северозападен				2	2	65	65
BG311	BG311				Видин			3	2	66	66
BG312	BG312				Монтана			3	2	67	67
BG313	BG313				Враца			3	2	68	68
BG314	BG314				Плевен			3	2	69	69
BG315	BG315				Ловеч			3	2	70	70
BG32	BG32			Северен централен				2	2	71	71
BG321	BG321				Велико Търново			3	2	72	72
BG322	BG322				Габрово			3	2	73	73
BG323	BG323				Русе			3	2	74	74
BG324	BG324				Разград			3	2	75	75
BG325	BG325				Силистра			3	2	76	76
BG33	BG33			Североизточен				2	2	77	77
BG331	BG331				Варна			3	2	78	78
BG332	BG332				Добрич			3	2	79	79
BG333	BG333				Шумен			3	2	80	80
BG334	BG334				Търговище			3	2	81	81
BG34	BG34			Югоизточен				2	2	82	82
BG341	BG341				Бургас			3	2	83	83
BG342	BG342				Сливен			3	2	84	84
BG343	BG343				Ямбол			3	2	85	85
BG344	BG344				Стара Загора			3	2	86	86
BG4	BG4		Югозападна и южна централна България					1	2	87	87
BG41	BG41			Югозападен				2	2	88	88
BG411	BG411				София (столица)			3	2	89	89
BG412	BG412				София			3	2	90	90
BG413	BG413				Благоевград			3	2	91	91
BG414	BG414				Перник			3	2	92	92
BG415	BG415				Кюстендил			3	2	93	93
BG42	BG42			Южен централен				2	2	94	94
BG421	BG421				Пловдив			3	2	95	95
BG422	BG422				Хасково			3	2	96	96
BG423	BG423				Пазарджик			3	2	97	97
BG424	BG424				Смолян			3	2	98	98
BG425	BG425				Кърджали			3	2	99	99
BGZ	BGZ		Extra-Regio NUTS 1					1	2	100	100
BGZZ	BGZZ			Extra-Regio NUTS 2				2	2	101	101
BGZZZ	BGZZZ				Extra-Regio NUTS 3			3	2	102	102
CZ	CZ	Česko				1	renamed	0	3	103	103
CZ0	CZ0		Česko			1	renamed	1	3	104	104
CZ01	CZ01			Praha				2	3	105	105
CZ010	CZ010				Hlavní město Praha			3	3	106	106
CZ02	CZ02			Střední Čechy				2	3	107	107
CZ020	CZ020				Středočeský kraj			3	3	108	108
CZ03	CZ03			Jihozápad				2	3	109	109
CZ031	CZ031				Jihočeský kraj			3	3	110	110
CZ032	CZ032				Plzeňský kraj			3	3	111	111
CZ04	CZ04			Severozápad				2	3	112	112
CZ041	CZ041				Karlovarský kraj			3	3	113	113
CZ042	CZ042				Ústecký kraj			3	3	114	114
CZ05	CZ05			Severovýchod				2	3	115	115
CZ051	CZ051				Liberecký kraj			3	3	116	116
CZ052	CZ052				Královéhradecký kraj			3	3	117	117
CZ053	CZ053				Pardubický kraj			3	3	118	118
CZ06	CZ06			Jihovýchod				2	3	119	119
CZ063	CZ063				Kraj Vysočina			3	3	120	120
CZ064	CZ064				Jihomoravský kraj			3	3	121	121
CZ07	CZ07			Střední Morava				2	3	122	122
CZ071	CZ071				Olomoucký kraj			3	3	123	123
CZ072	CZ072				Zlínský kraj			3	3	124	124
CZ08	CZ08			Moravskoslezsko				2	3	125	125
CZ080	CZ080				Moravskoslezský kraj			3	3	126	126
CZZ	CZZ		Extra-Regio NUTS 1					1	3	127	127
CZZZ	CZZZ			Extra-Regio NUTS 2				2	3	128	128
CZZZZ	CZZZZ				Extra-Regio NUTS 3			3	3	129	129
DK	DK	Danmark						0	4	130	130
DK0	DK0		Danmark					1	4	131	131
DK01	DK01			Hovedstaden				2	4	132	132
DK011	DK011				Byen København			3	4	133	133
DK012	DK012				Københavns omegn			3	4	134	134
DK013	DK013				Nordsjælland			3	4	135	135
DK014	DK014				Bornholm			3	4	136	136
DK02	DK02			Sjælland				2	4	137	137
DK021	DK021				Østsjælland			3	4	138	138
DK022	DK022				Vest- og Sydsjælland			3	4	139	139
DK03	DK03			Syddanmark				2	4	140	140
DK031	DK031				Fyn			3	4	141	141
DK032	DK032				Sydjylland			3	4	142	142
DK04	DK04			Midtjylland				2	4	143	143
DK041	DK041				Vestjylland			3	4	144	144
DK042	DK042				Østjylland			3	4	145	145
DK05	DK05			Nordjylland				2	4	146	146
DK050	DK050				Nordjylland			3	4	147	147
DKZ	DKZ		Extra-Regio NUTS 1					1	4	148	148
DKZZ	DKZZ			Extra-Regio NUTS 2				2	4	149	149
DKZZZ	DKZZZ				Extra-Regio NUTS 3			3	4	150	150
DE	DE	Deutschland						0	5	151	151
DE1	DE1		Baden-Württemberg					1	5	152	152
DE11	DE11			Stuttgart				2	5	153	153
DE111	DE111				Stuttgart, Stadtkreis			3	5	154	154
DE112	DE112				Böblingen			3	5	155	155
DE113	DE113				Esslingen			3	5	156	156
DE114	DE114				Göppingen			3	5	157	157
DE115	DE115				Ludwigsburg			3	5	158	158
DE116	DE116				Rems-Murr-Kreis			3	5	159	159
DE117	DE117				Heilbronn, Stadtkreis			3	5	160	160
DE118	DE118				Heilbronn, Landkreis			3	5	161	161
DE119	DE119				Hohenlohekreis			3	5	162	162
DE11A	DE11A				Schwäbisch Hall			3	5	163	163
DE11B	DE11B				Main-Tauber-Kreis			3	5	164	164
DE11C	DE11C				Heidenheim			3	5	165	165
DE11D	DE11D				Ostalbkreis			3	5	166	166
DE12	DE12			Karlsruhe				2	5	167	167
DE121	DE121				Baden-Baden, Stadtkreis			3	5	168	168
DE122	DE122				Karlsruhe, Stadtkreis			3	5	169	169
DE123	DE123				Karlsruhe, Landkreis			3	5	170	170
DE124	DE124				Rastatt			3	5	171	171
DE125	DE125				Heidelberg, Stadtkreis			3	5	172	172
DE126	DE126				Mannheim, Stadtkreis			3	5	173	173
DE127	DE127				Neckar-Odenwald-Kreis			3	5	174	174
DE128	DE128				Rhein-Neckar-Kreis			3	5	175	175
DE129	DE129				Pforzheim, Stadtkreis			3	5	176	176
DE12A	DE12A				Calw			3	5	177	177
DE12B	DE12B				Enzkreis			3	5	178	178
DE12C	DE12C				Freudenstadt			3	5	179	179
DE13	DE13			Freiburg				2	5	180	180
DE131	DE131				Freiburg im Breisgau, Stadtkreis			3	5	181	181
DE132	DE132				Breisgau-Hochschwarzwald			3	5	182	182
DE133	DE133				Emmendingen			3	5	183	183
DE134	DE134				Ortenaukreis			3	5	184	184
DE135	DE135				Rottweil			3	5	185	185
DE136	DE136				Schwarzwald-Baar-Kreis			3	5	186	186
DE137	DE137				Tuttlingen			3	5	187	187
DE138	DE138				Konstanz			3	5	188	188
DE139	DE139				Lörrach			3	5	189	189
DE13A	DE13A				Waldshut			3	5	190	190
DE14	DE14			Tübingen				2	5	191	191
DE141	DE141				Reutlingen			3	5	192	192
DE142	DE142				Tübingen, Landkreis			3	5	193	193
DE143	DE143				Zollernalbkreis			3	5	194	194
DE144	DE144				Ulm, Stadtkreis			3	5	195	195
DE145	DE145				Alb-Donau-Kreis			3	5	196	196
DE146	DE146				Biberach			3	5	197	197
DE147	DE147				Bodenseekreis			3	5	198	198
DE148	DE148				Ravensburg			3	5	199	199
DE149	DE149				Sigmaringen			3	5	200	200
DE2	DE2		Bayern					1	5	201	201
DE21	DE21			Oberbayern				2	5	202	202
DE211	DE211				Ingolstadt, Kreisfreie Stadt			3	5	203	203
DE212	DE212				München, Kreisfreie Stadt			3	5	204	204
DE213	DE213				Rosenheim, Kreisfreie Stadt			3	5	205	205
DE214	DE214				Altötting			3	5	206	206
DE215	DE215				Berchtesgadener Land			3	5	207	207
DE216	DE216				Bad Tölz-Wolfratshausen			3	5	208	208
DE217	DE217				Dachau			3	5	209	209
DE218	DE218				Ebersberg			3	5	210	210
DE219	DE219				Eichstätt			3	5	211	211
DE21A	DE21A				Erding			3	5	212	212
DE21B	DE21B				Freising			3	5	213	213
DE21C	DE21C				Fürstenfeldbruck			3	5	214	214
DE21D	DE21D				Garmisch-Partenkirchen			3	5	215	215
DE21E	DE21E				Landsberg am Lech			3	5	216	216
DE21F	DE21F				Miesbach			3	5	217	217
DE21G	DE21G				Mühldorf a. Inn			3	5	218	218
DE21H	DE21H				München, Landkreis			3	5	219	219
DE21I	DE21I				Neuburg-Schrobenhausen			3	5	220	220
DE21J	DE21J				Pfaffenhofen a. d. Ilm			3	5	221	221
DE21K	DE21K				Rosenheim, Landkreis			3	5	222	222
DE21L	DE21L				Starnberg			3	5	223	223
DE21M	DE21M				Traunstein			3	5	224	224
DE21N	DE21N				Weilheim-Schongau			3	5	225	225
DE22	DE22			Niederbayern				2	5	226	226
DE221	DE221				Landshut, Kreisfreie Stadt			3	5	227	227
DE222	DE222				Passau, Kreisfreie Stadt			3	5	228	228
DE223	DE223				Straubing, Kreisfreie Stadt			3	5	229	229
DE224	DE224				Deggendorf			3	5	230	230
DE225	DE225				Freyung-Grafenau			3	5	231	231
DE226	DE226				Kelheim			3	5	232	232
DE227	DE227				Landshut, Landkreis			3	5	233	233
DE228	DE228				Passau, Landkreis			3	5	234	234
DE229	DE229				Regen			3	5	235	235
DE22A	DE22A				Rottal-Inn			3	5	236	236
DE22B	DE22B				Straubing-Bogen			3	5	237	237
DE22C	DE22C				Dingolfing-Landau			3	5	238	238
DE23	DE23			Oberpfalz				2	5	239	239
DE231	DE231				Amberg, Kreisfreie Stadt			3	5	240	240
DE232	DE232				Regensburg, Kreisfreie Stadt			3	5	241	241
DE233	DE233				Weiden i. d. Opf, Kreisfreie Stadt			3	5	242	242
DE234	DE234				Amberg-Sulzbach			3	5	243	243
DE235	DE235				Cham			3	5	244	244
DE236	DE236				Neumarkt i. d. OPf.			3	5	245	245
DE237	DE237				Neustadt a. d. Waldnaab			3	5	246	246
DE238	DE238				Regensburg, Landkreis			3	5	247	247
DE239	DE239				Schwandorf			3	5	248	248
DE23A	DE23A				Tirschenreuth			3	5	249	249
DE24	DE24			Oberfranken				2	5	250	250
DE241	DE241				Bamberg, Kreisfreie Stadt			3	5	251	251
DE242	DE242				Bayreuth, Kreisfreie Stadt			3	5	252	252
DE243	DE243				Coburg, Kreisfreie Stadt			3	5	253	253
DE244	DE244				Hof, Kreisfreie Stadt			3	5	254	254
DE245	DE245				Bamberg, Landkreis			3	5	255	255
DE246	DE246				Bayreuth, Landkreis			3	5	256	256
DE247	DE247				Coburg, Landkreis			3	5	257	257
DE248	DE248				Forchheim			3	5	258	258
DE249	DE249				Hof, Landkreis			3	5	259	259
DE24A	DE24A				Kronach			3	5	260	260
DE24B	DE24B				Kulmbach			3	5	261	261
DE24C	DE24C				Lichtenfels			3	5	262	262
DE24D	DE24D				Wunsiedel i. Fichtelgebirge			3	5	263	263
DE25	DE25			Mittelfranken				2	5	264	264
DE251	DE251				Ansbach, Kreisfreie Stadt			3	5	265	265
DE252	DE252				Erlangen, Kreisfreie Stadt			3	5	266	266
DE253	DE253				Fürth, Kreisfreie Stadt			3	5	267	267
DE254	DE254				Nürnberg, Kreisfreie Stadt			3	5	268	268
DE255	DE255				Schwabach, Kreisfreie Stadt			3	5	269	269
DE256	DE256				Ansbach, Landkreis			3	5	270	270
DE257	DE257				Erlangen-Höchstadt			3	5	271	271
DE258	DE258				Fürth, Landkreis			3	5	272	272
DE259	DE259				Nürnberger Land			3	5	273	273
DE25A	DE25A				Neustadt a. d. Aisch-Bad Windsheim			3	5	274	274
DE25B	DE25B				Roth			3	5	275	275
DE25C	DE25C				Weißenburg-Gunzenhausen			3	5	276	276
DE26	DE26			Unterfranken				2	5	277	277
DE261	DE261				Aschaffenburg, Kreisfreie Stadt			3	5	278	278
DE262	DE262				Schweinfurt, Kreisfreie Stadt			3	5	279	279
DE263	DE263				Würzburg, Kreisfreie Stadt			3	5	280	280
DE264	DE264				Aschaffenburg, Landkreis			3	5	281	281
DE265	DE265				Bad Kissingen			3	5	282	282
DE266	DE266				Rhön-Grabfeld			3	5	283	283
DE267	DE267				Haßberge			3	5	284	284
DE268	DE268				Kitzingen			3	5	285	285
DE269	DE269				Miltenberg			3	5	286	286
DE26A	DE26A				Main-Spessart			3	5	287	287
DE26B	DE26B				Schweinfurt, Landkreis			3	5	288	288
DE26C	DE26C				Würzburg, Landkreis			3	5	289	289
DE27	DE27			Schwaben				2	5	290	290
DE271	DE271				Augsburg, Kreisfreie Stadt			3	5	291	291
DE272	DE272				Kaufbeuren, Kreisfreie Stadt			3	5	292	292
DE273	DE273				Kempten (Allgäu), Kreisfreie Stadt			3	5	293	293
DE274	DE274				Memmingen, Kreisfreie Stadt			3	5	294	294
DE275	DE275				Aichach-Friedberg			3	5	295	295
DE276	DE276				Augsburg, Landkreis			3	5	296	296
DE277	DE277				Dillingen a.d. Donau			3	5	297	297
DE278	DE278				Günzburg			3	5	298	298
DE279	DE279				Neu-Ulm			3	5	299	299
DE27A	DE27A				Lindau (Bodensee)			3	5	300	300
DE27B	DE27B				Ostallgäu			3	5	301	301
DE27C	DE27C				Unterallgäu			3	5	302	302
DE27D	DE27D				Donau-Ries			3	5	303	303
DE27E	DE27E				Oberallgäu			3	5	304	304
DE3	DE3		Berlin					1	5	305	305
DE30	DE30			Berlin				2	5	306	306
DE300	DE300				Berlin			3	5	307	307
DE4	DE4		Brandenburg					1	5	308	308
DE40	DE40			Brandenburg				2	5	309	309
DE401	DE401				Brandenburg an der Havel, Kreisfreie Stadt			3	5	310	310
DE402	DE402				Cottbus, Kreisfreie Stadt			3	5	311	311
DE403	DE403				Frankfurt (Oder), Kreisfreie Stadt			3	5	312	312
DE404	DE404				Potsdam, Kreisfreie Stadt			3	5	313	313
DE405	DE405				Barnim			3	5	314	314
DE406	DE406				Dahme-Spreewald			3	5	315	315
DE407	DE407				Elbe-Elster			3	5	316	316
DE408	DE408				Havelland			3	5	317	317
DE409	DE409				Märkisch-Oderland			3	5	318	318
DE40A	DE40A				Oberhavel			3	5	319	319
DE40B	DE40B				Oberspreewald-Lausitz			3	5	320	320
DE40C	DE40C				Oder-Spree			3	5	321	321
DE40D	DE40D				Ostprignitz-Ruppin			3	5	322	322
DE40E	DE40E				Potsdam-Mittelmark			3	5	323	323
DE40F	DE40F				Prignitz			3	5	324	324
DE40G	DE40G				Spree-Neiße			3	5	325	325
DE40H	DE40H				Teltow-Fläming			3	5	326	326
DE40I	DE40I				Uckermark			3	5	327	327
DE5	DE5		Bremen					1	5	328	328
DE50	DE50			Bremen				2	5	329	329
DE501	DE501				Bremen, Kreisfreie Stadt			3	5	330	330
DE502	DE502				Bremerhaven, Kreisfreie Stadt			3	5	331	331
DE6	DE6		Hamburg					1	5	332	332
DE60	DE60			Hamburg				2	5	333	333
DE600	DE600				Hamburg			3	5	334	334
DE7	DE7		Hessen					1	5	335	335
DE71	DE71			Darmstadt				2	5	336	336
DE711	DE711				Darmstadt, Kreisfreie Stadt			3	5	337	337
DE712	DE712				Frankfurt am Main, Kreisfreie Stadt			3	5	338	338
DE713	DE713				Offenbach am Main, Kreisfreie Stadt			3	5	339	339
DE714	DE714				Wiesbaden, Kreisfreie Stadt			3	5	340	340
DE715	DE715				Bergstraße			3	5	341	341
DE716	DE716				Darmstadt-Dieburg			3	5	342	342
DE717	DE717				Groß-Gerau			3	5	343	343
DE718	DE718				Hochtaunuskreis			3	5	344	344
DE719	DE719				Main-Kinzig-Kreis			3	5	345	345
DE71A	DE71A				Main-Taunus-Kreis			3	5	346	346
DE71B	DE71B				Odenwaldkreis			3	5	347	347
DE71C	DE71C				Offenbach, Landkreis			3	5	348	348
DE71D	DE71D				Rheingau-Taunus-Kreis			3	5	349	349
DE71E	DE71E				Wetteraukreis			3	5	350	350
DE72	DE72			Gießen				2	5	351	351
DE721	DE721				Gießen, Landkreis			3	5	352	352
DE722	DE722				Lahn-Dill-Kreis			3	5	353	353
DE723	DE723				Limburg-Weilburg			3	5	354	354
DE724	DE724				Marburg-Biedenkopf			3	5	355	355
DE725	DE725				Vogelsbergkreis			3	5	356	356
DE73	DE73			Kassel				2	5	357	357
DE731	DE731				Kassel, Kreisfreie Stadt			3	5	358	358
DE732	DE732				Fulda			3	5	359	359
DE733	DE733				Hersfeld-Rotenburg			3	5	360	360
DE734	DE734				Kassel, Landkreis			3	5	361	361
DE735	DE735				Schwalm-Eder-Kreis			3	5	362	362
DE736	DE736				Waldeck-Frankenberg			3	5	363	363
DE737	DE737				Werra-Meißner-Kreis			3	5	364	364
DE8	DE8		Mecklenburg-Vorpommern					1	5	365	365
DE80	DE80			Mecklenburg-Vorpommern				2	5	366	366
DE803	DE803				Rostock, Kreisfreie Stadt			3	5	367	367
DE804	DE804				Schwerin, Kreisfreie Stadt			3	5	368	368
DE80J	DE80J				Mecklenburgische Seenplatte			3	5	369	369
DE80K	DE80K				Landkreis Rostock			3	5	371	371
DE80L	DE80L				Vorpommern-Rügen			3	5	372	372
DE80M	DE80M				Nordwestmecklenburg			3	5	373	373
DE80N	DE80N				Vorpommern-Greifswald			3	5	370	370
DE80O	DE80O				Ludwigslust-Parchim			3	5	374	374
DE9	DE9		Niedersachsen					1	5	375	375
DE91	DE91			Braunschweig				2	5	376	376
DE911	DE911				Braunschweig, Kreisfreie Stadt			3	5	377	377
DE912	DE912				Salzgitter, Kreisfreie Stadt			3	5	378	378
DE913	DE913				Wolfsburg, Kreisfreie Stadt			3	5	379	379
DE914	DE914				Gifhorn			3	5	380	380
DE916	DE916				Goslar			3	5	381	381
DE917	DE917				Helmstedt			3	5	382	382
DE918	DE918				Northeim			3	5	383	383
DE91A	DE91A				Peine			3	5	384	384
DE91B	DE91B				Wolfenbüttel			3	5	385	385
DE91C	DE91C				Göttingen			3	5	386	386
DE92	DE92			Hannover				2	5	387	387
DE922	DE922				Diepholz			3	5	388	388
DE923	DE923				Hameln-Pyrmont			3	5	389	389
DE925	DE925				Hildesheim			3	5	390	390
DE926	DE926				Holzminden			3	5	391	391
DE927	DE927				Nienburg (Weser)			3	5	392	392
DE928	DE928				Schaumburg			3	5	393	393
DE929	DE929				Region Hannover			3	5	394	394
DE93	DE93			Lüneburg				2	5	395	395
DE931	DE931				Celle			3	5	396	396
DE932	DE932				Cuxhaven			3	5	397	397
DE933	DE933				Harburg			3	5	398	398
DE934	DE934				Lüchow-Dannenberg			3	5	399	399
DE935	DE935				Lüneburg, Landkreis			3	5	400	400
DE936	DE936				Osterholz			3	5	401	401
DE937	DE937				Rotenburg (Wümme)			3	5	402	402
DE938	DE938				Heidekreis			3	5	403	403
DE939	DE939				Stade			3	5	404	404
DE93A	DE93A				Uelzen			3	5	405	405
DE93B	DE93B				Verden			3	5	406	406
DE94	DE94			Weser-Ems				2	5	407	407
DE941	DE941				Delmenhorst, Kreisfreie Stadt			3	5	408	408
DE942	DE942				Emden, Kreisfreie Stadt			3	5	409	409
DE943	DE943				Oldenburg (Oldenburg), Kreisfreie Stadt			3	5	410	410
DE944	DE944				Osnabrück, Kreisfreie Stadt			3	5	411	411
DE945	DE945				Wilhelmshaven, Kreisfreie Stadt			3	5	412	412
DE946	DE946				Ammerland			3	5	413	413
DE947	DE947				Aurich			3	5	414	414
DE948	DE948				Cloppenburg			3	5	415	415
DE949	DE949				Emsland			3	5	416	416
DE94A	DE94A				Friesland (DE)			3	5	417	417
DE94B	DE94B				Grafschaft Bentheim			3	5	418	418
DE94C	DE94C				Leer			3	5	419	419
DE94D	DE94D				Oldenburg, Landkreis			3	5	420	420
DE94E	DE94E				Osnabrück, Landkreis			3	5	421	421
DE94F	DE94F				Vechta			3	5	422	422
DE94G	DE94G				Wesermarsch			3	5	423	423
DE94H	DE94H				Wittmund			3	5	424	424
DEA	DEA		Nordrhein-Westfalen					1	5	425	425
DEA1	DEA1			Düsseldorf				2	5	426	426
DEA11	DEA11				Düsseldorf, Kreisfreie Stadt			3	5	427	427
DEA12	DEA12				Duisburg, Kreisfreie Stadt			3	5	428	428
DEA13	DEA13				Essen, Kreisfreie Stadt			3	5	429	429
DEA14	DEA14				Krefeld, Kreisfreie Stadt			3	5	430	430
DEA15	DEA15				Mönchengladbach, Kreisfreie Stadt			3	5	431	431
DEA16	DEA16				Mülheim an der Ruhr, Kreisfreie Stadt			3	5	432	432
DEA17	DEA17				Oberhausen, Kreisfreie Stadt			3	5	433	433
DEA18	DEA18				Remscheid, Kreisfreie Stadt			3	5	434	434
DEA19	DEA19				Solingen, Kreisfreie Stadt			3	5	435	435
DEA1A	DEA1A				Wuppertal, Kreisfreie Stadt			3	5	436	436
DEA1B	DEA1B				Kleve			3	5	437	437
DEA1C	DEA1C				Mettmann			3	5	438	438
DEA1D	DEA1D				Rhein-Kreis Neuss			3	5	439	439
DEA1E	DEA1E				Viersen			3	5	440	440
DEA1F	DEA1F				Wesel			3	5	441	441
DEA2	DEA2			Köln				2	5	442	442
DEA22	DEA22				Bonn, Kreisfreie Stadt			3	5	443	443
DEA23	DEA23				Köln, Kreisfreie Stadt			3	5	444	444
DEA24	DEA24				Leverkusen, Kreisfreie Stadt			3	5	445	445
DEA26	DEA26				Düren			3	5	446	446
DEA27	DEA27				Rhein-Erft-Kreis			3	5	447	447
DEA28	DEA28				Euskirchen			3	5	448	448
DEA29	DEA29				Heinsberg			3	5	449	449
DEA2A	DEA2A				Oberbergischer Kreis			3	5	450	450
DEA2B	DEA2B				Rheinisch-Bergischer Kreis			3	5	451	451
DEA2C	DEA2C				Rhein-Sieg-Kreis			3	5	452	452
DEA2D	DEA2D				Städteregion Aachen			3	5	453	453
DEA3	DEA3			Münster				2	5	454	454
DEA31	DEA31				Bottrop, Kreisfreie Stadt			3	5	455	455
DEA32	DEA32				Gelsenkirchen, Kreisfreie Stadt			3	5	456	456
DEA33	DEA33				Münster, Kreisfreie Stadt			3	5	457	457
DEA34	DEA34				Borken			3	5	458	458
DEA35	DEA35				Coesfeld			3	5	459	459
DEA36	DEA36				Recklinghausen			3	5	460	460
DEA37	DEA37				Steinfurt			3	5	461	461
DEA38	DEA38				Warendorf			3	5	462	462
DEA4	DEA4			Detmold				2	5	463	463
DEA41	DEA41				Bielefeld, Kreisfreie Stadt			3	5	464	464
DEA42	DEA42				Gütersloh			3	5	465	465
DEA43	DEA43				Herford			3	5	466	466
DEA44	DEA44				Höxter			3	5	467	467
DEA45	DEA45				Lippe			3	5	468	468
DEA46	DEA46				Minden-Lübbecke			3	5	469	469
DEA47	DEA47				Paderborn			3	5	470	470
DEA5	DEA5			Arnsberg				2	5	471	471
DEA51	DEA51				Bochum, Kreisfreie Stadt			3	5	472	472
DEA52	DEA52				Dortmund, Kreisfreie Stadt			3	5	473	473
DEA53	DEA53				Hagen, Kreisfreie Stadt			3	5	474	474
DEA54	DEA54				Hamm, Kreisfreie Stadt			3	5	475	475
DEA55	DEA55				Herne, Kreisfreie Stadt			3	5	476	476
DEA56	DEA56				Ennepe-Ruhr-Kreis			3	5	477	477
DEA57	DEA57				Hochsauerlandkreis			3	5	478	478
DEA58	DEA58				Märkischer Kreis			3	5	479	479
DEA59	DEA59				Olpe			3	5	480	480
DEA5A	DEA5A				Siegen-Wittgenstein			3	5	481	481
DEA5B	DEA5B				Soest			3	5	482	482
DEA5C	DEA5C				Unna			3	5	483	483
DEB	DEB		Rheinland-Pfalz					1	5	484	484
DEB1	DEB1			Koblenz				2	5	485	485
DEB11	DEB11				Koblenz, Kreisfreie Stadt			3	5	486	486
DEB12	DEB12				Ahrweiler			3	5	487	487
DEB13	DEB13				Altenkirchen (Westerwald)			3	5	488	488
DEB14	DEB14				Bad Kreuznach			3	5	489	489
DEB15	DEB15				Birkenfeld			3	5	490	490
DEB17	DEB17				Mayen-Koblenz			3	5	491	491
DEB18	DEB18				Neuwied			3	5	492	492
DEB1A	DEB1A				Rhein-Lahn-Kreis			3	5	493	493
DEB1B	DEB1B				Westerwaldkreis			3	5	494	494
DEB1C	DEB1C				Cochem-Zell			3	5	495	495
DEB1D	DEB1D				Rhein-Hunsrück-Kreis			3	5	496	496
DEB2	DEB2			Trier				2	5	497	497
DEB21	DEB21				Trier, Kreisfreie Stadt			3	5	498	498
DEB22	DEB22				Bernkastel-Wittlich			3	5	499	499
DEB23	DEB23				Eifelkreis Bitburg-Prüm			3	5	500	500
DEB24	DEB24				Vulkaneifel			3	5	501	501
DEB25	DEB25				Trier-Saarburg			3	5	502	502
DEB3	DEB3			Rheinhessen-Pfalz				2	5	503	503
DEB31	DEB31				Frankenthal (Pfalz), Kreisfreie Stadt			3	5	504	504
DEB32	DEB32				Kaiserslautern, Kreisfreie Stadt			3	5	505	505
DEB33	DEB33				Landau in der Pfalz, Kreisfreie Stadt			3	5	506	506
DEB34	DEB34				Ludwigshafen am Rhein, Kreisfreie Stadt			3	5	507	507
DEB35	DEB35				Mainz, Kreisfreie Stadt			3	5	508	508
DEB36	DEB36				Neustadt an der Weinstraße, Kreisfreie Stadt			3	5	509	509
DEB37	DEB37				Pirmasens, Kreisfreie Stadt			3	5	510	510
DEB38	DEB38				Speyer, Kreisfreie Stadt			3	5	511	511
DEB39	DEB39				Worms, Kreisfreie Stadt			3	5	512	512
DEB3A	DEB3A				Zweibrücken, Kreisfreie Stadt			3	5	513	513
DEB3B	DEB3B				Alzey-Worms			3	5	514	514
DEB3C	DEB3C				Bad Dürkheim			3	5	515	515
DEB3D	DEB3D				Donnersbergkreis			3	5	516	516
DEB3E	DEB3E				Germersheim			3	5	517	517
DEB3F	DEB3F				Kaiserslautern, Landkreis			3	5	518	518
DEB3G	DEB3G				Kusel			3	5	519	519
DEB3H	DEB3H				Südliche Weinstraße			3	5	520	520
DEB3I	DEB3I				Rhein-Pfalz-Kreis			3	5	521	521
DEB3J	DEB3J				Mainz-Bingen			3	5	522	522
DEB3K	DEB3K				Südwestpfalz			3	5	523	523
DEC	DEC		Saarland					1	5	524	524
DEC0	DEC0			Saarland				2	5	525	525
DEC01	DEC01				Regionalverband Saarbrücken			3	5	526	526
DEC02	DEC02				Merzig-Wadern			3	5	527	527
DEC03	DEC03				Neunkirchen			3	5	528	528
DEC04	DEC04				Saarlouis			3	5	529	529
DEC05	DEC05				Saarpfalz-Kreis			3	5	530	530
DEC06	DEC06				St. Wendel			3	5	531	531
DED	DED		Sachsen					1	5	532	532
DED2	DED2			Dresden				2	5	533	533
DED21	DED21				Dresden, Kreisfreie Stadt			3	5	534	534
DED2C	DED2C				Bautzen			3	5	535	535
DED2D	DED2D				Görlitz			3	5	536	536
DED2E	DED2E				Meißen			3	5	537	537
DED2F	DED2F				Sächsische Schweiz-Osterzgebirge			3	5	538	538
DED4	DED4			Chemnitz				2	5	539	539
DED41	DED41				Chemnitz, Kreisfreie Stadt			3	5	540	540
DED42	DED42				Erzgebirgskreis			3	5	541	541
DED43	DED43				Mittelsachsen			3	5	542	542
DED44	DED44				Vogtlandkreis			3	5	543	543
DED45	DED45				Zwickau			3	5	544	544
DED5	DED5			Leipzig				2	5	545	545
DED51	DED51				Leipzig, Kreisfreie Stadt			3	5	546	546
DED52	DED52				Leipzig			3	5	547	547
DED53	DED53				Nordsachsen			3	5	548	548
DEE	DEE		Sachsen-Anhalt					1	5	549	549
DEE0	DEE0			Sachsen-Anhalt				2	5	550	550
DEE01	DEE01				Dessau-Roßlau, Kreisfreie Stadt			3	5	551	551
DEE02	DEE02				Halle (Saale), Kreisfreie Stadt			3	5	552	552
DEE03	DEE03				Magdeburg, Kreisfreie Stadt			3	5	553	553
DEE04	DEE04				Altmarkkreis Salzwedel			3	5	554	554
DEE05	DEE05				Anhalt-Bitterfeld			3	5	555	555
DEE06	DEE06				Jerichower Land			3	5	556	556
DEE07	DEE07				Börde			3	5	557	557
DEE08	DEE08				Burgenlandkreis			3	5	558	558
DEE09	DEE09				Harz			3	5	559	559
DEE0A	DEE0A				Mansfeld-Südharz			3	5	560	560
DEE0B	DEE0B				Saalekreis			3	5	561	561
DEE0C	DEE0C				Salzlandkreis			3	5	562	562
DEE0D	DEE0D				Stendal			3	5	563	563
DEE0E	DEE0E				Wittenberg			3	5	564	564
DEF	DEF		Schleswig-Holstein					1	5	565	565
DEF0	DEF0			Schleswig-Holstein				2	5	566	566
DEF01	DEF01				Flensburg, Kreisfreie Stadt			3	5	567	567
DEF02	DEF02				Kiel, Kreisfreie Stadt			3	5	568	568
DEF03	DEF03				Lübeck, Kreisfreie Stadt			3	5	569	569
DEF04	DEF04				Neumünster, Kreisfreie Stadt			3	5	570	570
DEF05	DEF05				Dithmarschen			3	5	571	571
DEF06	DEF06				Herzogtum Lauenburg			3	5	572	572
DEF07	DEF07				Nordfriesland			3	5	573	573
DEF08	DEF08				Ostholstein			3	5	574	574
DEF09	DEF09				Pinneberg			3	5	575	575
DEF0A	DEF0A				Plön			3	5	576	576
DEF0B	DEF0B				Rendsburg-Eckernförde			3	5	577	577
DEF0C	DEF0C				Schleswig-Flensburg			3	5	578	578
DEF0D	DEF0D				Segeberg			3	5	579	579
DEF0E	DEF0E				Steinburg			3	5	580	580
DEF0F	DEF0F				Stormarn			3	5	581	581
DEG	DEG		Thüringen					1	5	582	582
DEG0	DEG0			Thüringen				2	5	583	583
DEG01	DEG01				Erfurt, Kreisfreie Stadt			3	5	584	584
DEG02	DEG02				Gera, Kreisfreie Stadt			3	5	585	585
DEG03	DEG03				Jena, Kreisfreie Stadt			3	5	586	586
DEG04	DEG04				Suhl, Kreisfreie Stadt			3	5	587	587
DEG05	DEG05				Weimar, Kreisfreie Stadt			3	5	588	588
DEG06	DEG06				Eichsfeld			3	5	589	589
DEG07	DEG07				Nordhausen			3	5	590	590
DEG09	DEG09				Unstrut-Hainich-Kreis			3	5	591	591
DEG0A	DEG0A				Kyffhäuserkreis			3	5	592	592
DEG0B	DEG0B				Schmalkalden-Meiningen			3	5	593	593
DEG0C	DEG0C				Gotha			3	5	594	594
DEG0D	DEG0D				Sömmerda			3	5	595	595
DEG0E	DEG0E				Hildburghausen			3	5	596	596
DEG0F	DEG0F				Ilm-Kreis			3	5	597	597
DEG0G	DEG0G				Weimarer Land			3	5	598	598
DEG0H	DEG0H				Sonneberg			3	5	599	599
DEG0I	DEG0I				Saalfeld-Rudolstadt			3	5	600	600
DEG0J	DEG0J				Saale-Holzland-Kreis			3	5	601	601
DEG0K	DEG0K				Saale-Orla-Kreis			3	5	602	602
DEG0L	DEG0L				Greiz			3	5	603	603
DEG0M	DEG0M				Altenburger Land			3	5	604	604
DEG0N	DEG0N				Eisenach, Kreisfreie Stadt			3	5	605	605
DEG0P	DEG0P				Wartburgkreis			3	5	606	606
DEZ	DEZ		Extra-Regio NUTS 1					1	5	607	607
DEZZ	DEZZ			Extra-Regio NUTS 2				2	5	608	608
DEZZZ	DEZZZ				Extra-Regio NUTS 3			3	5	609	609
EE	EE	Eesti						0	6	610	610
EE0	EE0		Eesti					1	6	611	611
EE00	EE00			Eesti				2	6	612	612
EE001	EE001				Põhja-Eesti			3	6	613	613
EE004	EE004				Lääne-Eesti			3	6	614	614
EE008	EE008				Lõuna-Eesti			3	6	617	615
EE006	EE009				Kesk-Eesti	3	recode, boundary change	3	6	615	616
EE007	EE00A				Kirde-Eesti	3	recode, boundary change	3	6	616	617
EEZ	EEZ		Extra-Regio NUTS 1					1	6	618	618
EEZZ	EEZZ			Extra-Regio NUTS 2				2	6	619	619
EEZZZ	EEZZZ				Extra-Regio NUTS 3			3	6	620	620
IE	IE	Éire/Ireland						0	7	621	621
IE0	IE0		Ireland					1	7	622	622
IE04	IE04			Northern and Western				2	7	623	623
IE041	IE041				Border			3	7	624	624
IE042	IE042				West			3	7	625	625
IE05	IE05			Southern				2	7	626	626
IE051	IE051				Mid-West			3	7	627	627
IE052	IE052				South-East			3	7	628	628
IE053	IE053				South-West			3	7	629	629
IE06	IE06			Eastern and Midland				2	7	630	630
IE061	IE061				Dublin			3	7	631	631
IE062	IE062				Mid-East			3	7	632	632
IE063	IE063				Midland			3	7	633	633
IEZ	IEZ		Extra-Regio NUTS 1					1	7	634	634
IEZZ	IEZZ			Extra-Regio NUTS 2				2	7	635	635
IEZZZ	IEZZZ				Extra-Regio NUTS 3			3	7	636	636
EL	EL	Ελλάδα						0	8	637	637
EL3	EL3		Αττική					1	8	638	638
EL30	EL30			Aττική				2	8	639	639
EL301	EL301				Βόρειος Τομέας Αθηνών			3	8	640	640
EL302	EL302				Δυτικός Τομέας Αθηνών			3	8	641	641
EL303	EL303				Κεντρικός Τομέας Αθηνών			3	8	642	642
EL304	EL304				Νότιος Τομέας Αθηνών			3	8	643	643
EL305	EL305				Ανατολική Αττική			3	8	644	644
EL306	EL306				Δυτική Αττική			3	8	645	645
EL307	EL307				Πειραιάς, Νήσοι			3	8	646	646
EL4	EL4		Νησιά Αιγαίου, Κρήτη					1	8	647	647
EL41	EL41			Βόρειο Αιγαίο				2	8	648	648
EL411	EL411				Λέσβος, Λήμνος			3	8	649	649
EL412	EL412				Ικαρία, Σάμος			3	8	650	650
EL413	EL413				Χίος			3	8	651	651
EL42	EL42			Νότιο Αιγαίο				2	8	652	652
EL421	EL421				Κάλυμνος, Κάρπαθος – Ηρωική Νήσος Κάσος, Κως, Ρόδος	1	name change	3	8	653	653
EL422	EL422				Άνδρος, Θήρα, Κέα, Μήλος, Μύκονος, Νάξος, Πάρος, Σύρος, Τήνος			3	8	654	654
EL43	EL43			Κρήτη				2	8	655	655
EL431	EL431				Ηράκλειο			3	8	656	656
EL432	EL432				Λασίθι			3	8	657	657
EL433	EL433				Ρέθυμνο			3	8	658	658
EL434	EL434				Χανιά			3	8	659	659
EL5	EL5		Βόρεια Ελλάδα					1	8	660	660
EL51	EL51			Aνατολική Μακεδονία, Θράκη				2	8	661	661
EL511	EL511				Έβρος			3	8	662	662
EL512	EL512				Ξάνθη			3	8	663	663
EL513	EL513				Ροδόπη			3	8	664	664
EL514	EL514				Δράμα			3	8	665	665
EL515	EL515				Θάσος, Καβάλα			3	8	666	666
EL52	EL52			Κεντρική Μακεδονία				2	8	667	667
EL521	EL521				Ημαθία			3	8	668	668
EL522	EL522				Θεσσαλονίκη			3	8	669	669
EL523	EL523				Κιλκίς			3	8	670	670
EL524	EL524				Πέλλα			3	8	671	671
EL525	EL525				Πιερία			3	8	672	672
EL526	EL526				Σέρρες			3	8	673	673
EL527	EL527				Χαλκιδική			3	8	674	674
EL53	EL53			Δυτική Μακεδονία				2	8	675	675
EL531	EL531				Γρεβενά, Κοζάνη			3	8	676	676
EL532	EL532				Καστοριά			3	8	677	677
EL533	EL533				Φλώρινα			3	8	678	678
EL54	EL54			Ήπειρος				2	8	679	679
EL541	EL541				Άρτα, Πρέβεζα			3	8	680	680
EL542	EL542				Θεσπρωτία			3	8	681	681
EL543	EL543				Ιωάννινα			3	8	682	682
EL6	EL6		Κεντρική Ελλάδα					1	8	683	683
EL61	EL61			Θεσσαλία				2	8	684	684
EL611	EL611				Καρδίτσα, Τρίκαλα			3	8	685	685
EL612	EL612				Λάρισα			3	8	686	686
EL613	EL613				Μαγνησία, Σποράδες			3	8	687	687
EL62	EL62			Ιόνια Νησιά				2	8	688	688
EL621	EL621				Ζάκυνθος			3	8	689	689
EL622	EL622				Κέρκυρα			3	8	690	690
EL623	EL623				Ιθάκη, Κεφαλληνία			3	8	691	691
EL624	EL624				Λευκάδα			3	8	692	692
EL63	EL63			Δυτική Ελλάδα				2	8	693	693
EL631	EL631				Αιτωλοακαρνανία			3	8	694	694
EL632	EL632				Αχαΐα			3	8	695	695
EL633	EL633				Ηλεία			3	8	696	696
EL64	EL64			Στερεά Ελλάδα				2	8	697	697
EL641	EL641				Βοιωτία			3	8	698	698
EL642	EL642				Εύβοια			3	8	699	699
EL643	EL643				Ευρυτανία			3	8	700	700
EL644	EL644				Φθιώτιδα			3	8	701	701
EL645	EL645				Φωκίδα			3	8	702	702
EL65	EL65			Πελοπόννησος				2	8	703	703
EL651	EL651				Αργολίδα, Αρκαδία			3	8	704	704
EL652	EL652				Κορινθία			3	8	705	705
EL653	EL653				Λακωνία, Μεσσηνία			3	8	706	706
ELZ	ELZ		Extra-Regio NUTS 1					1	8	707	707
ELZZ	ELZZ			Extra-Regio NUTS 2				2	8	708	708
ELZZZ	ELZZZ				Extra-Regio NUTS 3			3	8	709	709
ES	ES	España						0	9	710	710
ES1	ES1		Noroeste					1	9	711	711
ES11	ES11			Galicia				2	9	712	712
ES111	ES111				A Coruña			3	9	713	713
ES112	ES112				Lugo			3	9	714	714
ES113	ES113				Ourense			3	9	715	715
ES114	ES114				Pontevedra			3	9	716	716
ES12	ES12			Principado de Asturias				2	9	717	717
ES120	ES120				Asturias			3	9	718	718
ES13	ES13			Cantabria				2	9	719	719
ES130	ES130				Cantabria			3	9	720	720
ES2	ES2		Noreste					1	9	721	721
ES21	ES21			País Vasco				2	9	722	722
ES211	ES211				Araba/Álava			3	9	723	723
ES212	ES212				Gipuzkoa			3	9	724	724
ES213	ES213				Bizkaia			3	9	725	725
ES22	ES22			Comunidad Foral de Navarra				2	9	726	726
ES220	ES220				Navarra			3	9	727	727
ES23	ES23			La Rioja				2	9	728	728
ES230	ES230				La Rioja			3	9	729	729
ES24	ES24			Aragón				2	9	730	730
ES241	ES241				Huesca			3	9	731	731
ES242	ES242				Teruel			3	9	732	732
ES243	ES243				Zaragoza			3	9	733	733
ES3	ES3		Comunidad de Madrid					1	9	734	734
ES30	ES30			Comunidad de Madrid				2	9	735	735
ES300	ES300				Madrid			3	9	736	736
ES4	ES4		Centro (ES)					1	9	737	737
ES41	ES41			Castilla y León				2	9	738	738
ES411	ES411				Ávila			3	9	739	739
ES412	ES412				Burgos			3	9	740	740
ES413	ES413				León			3	9	741	741
ES414	ES414				Palencia			3	9	742	742
ES415	ES415				Salamanca			3	9	743	743
ES416	ES416				Segovia			3	9	744	744
ES417	ES417				Soria			3	9	745	745
ES418	ES418				Valladolid			3	9	746	746
ES419	ES419				Zamora			3	9	747	747
ES42	ES42			Castilla-La Mancha				2	9	748	748
ES421	ES421				Albacete			3	9	749	749
ES422	ES422				Ciudad Real			3	9	750	750
ES423	ES423				Cuenca			3	9	751	751
ES424	ES424				Guadalajara			3	9	752	752
ES425	ES425				Toledo			3	9	753	753
ES43	ES43			Extremadura				2	9	754	754
ES431	ES431				Badajoz			3	9	755	755
ES432	ES432				Cáceres			3	9	756	756
ES5	ES5		Este					1	9	757	757
ES51	ES51			Cataluña				2	9	758	758
ES511	ES511				Barcelona			3	9	759	759
ES512	ES512				Girona			3	9	760	760
ES513	ES513				Lleida			3	9	761	761
ES514	ES514				Tarragona			3	9	762	762
ES52	ES52			Comunitat Valenciana		1	name change	2	9	763	763
ES521	ES521				Alicante/Alacant			3	9	764	764
ES522	ES522				Castellón/Castelló			3	9	765	765
ES523	ES523				Valencia/València			3	9	766	766
ES53	ES53			Illes Balears				2	9	767	767
ES531	ES531				Eivissa y Formentera			3	9	768	768
ES532	ES532				Mallorca			3	9	769	769
ES533	ES533				Menorca			3	9	770	770
ES6	ES6		Sur					1	9	771	771
ES61	ES61			Andalucía				2	9	772	772
ES611	ES611				Almería			3	9	773	773
ES612	ES612				Cádiz			3	9	774	774
ES613	ES613				Córdoba			3	9	775	775
ES614	ES614				Granada			3	9	776	776
ES615	ES615				Huelva			3	9	777	777
ES616	ES616				Jaén			3	9	778	778
ES617	ES617				Málaga			3	9	779	779
ES618	ES618				Sevilla			3	9	780	780
ES62	ES62			Región de Murcia				2	9	781	781
ES620	ES620				Murcia			3	9	782	782
ES63	ES63			Ciudad de Ceuta		1	name change	2	9	783	783
ES630	ES630				Ceuta			3	9	784	784
ES64	ES64			Ciudad de Melilla		1	name change	2	9	785	785
ES640	ES640				Melilla			3	9	786	786
ES7	ES7		Canarias					1	9	787	787
ES70	ES70			Canarias				2	9	788	788
ES703	ES703				El Hierro			3	9	789	789
ES704	ES704				Fuerteventura			3	9	790	790
ES705	ES705				Gran Canaria			3	9	791	791
ES706	ES706				La Gomera			3	9	792	792
ES707	ES707				La Palma			3	9	793	793
ES708	ES708				Lanzarote			3	9	794	794
ES709	ES709				Tenerife			3	9	795	795
ESZ	ESZ		Extra-Regio NUTS 1					1	9	796	796
ESZZ	ESZZ			Extra-Regio NUTS 2				2	9	797	797
ESZZZ	ESZZZ				Extra-Regio NUTS 3			3	9	798	798
FR	FR	France						0	10	799	799
FR1	FR1		Ile-de-France					1	10	800	800
FR10	FR10			Ile-de-France				2	10	801	801
FR101	FR101				Paris			3	10	802	802
FR102	FR102				Seine-et-Marne			3	10	803	803
FR103	FR103				Yvelines			3	10	804	804
FR104	FR104				Essonne			3	10	805	805
FR105	FR105				Hauts-de-Seine			3	10	806	806
FR106	FR106				Seine-Saint-Denis			3	10	807	807
FR107	FR107				Val-de-Marne			3	10	808	808
FR108	FR108				Val-d’Oise			3	10	809	809
FRB	FRB		Centre — Val de Loire					1	10	810	810
FRB0	FRB0			Centre — Val de Loire				2	10	811	811
FRB01	FRB01				Cher			3	10	812	812
FRB02	FRB02				Eure-et-Loir			3	10	813	813
FRB03	FRB03				Indre			3	10	814	814
FRB04	FRB04				Indre-et-Loire			3	10	815	815
FRB05	FRB05				Loir-et-Cher			3	10	816	816
FRB06	FRB06				Loiret			3	10	817	817
FRC	FRC		Bourgogne-Franche-Comté					1	10	818	818
FRC1	FRC1			Bourgogne				2	10	819	819
FRC11	FRC11				Côte-d’Or			3	10	820	820
FRC12	FRC12				Nièvre			3	10	821	821
FRC13	FRC13				Saône-et-Loire			3	10	822	822
FRC14	FRC14				Yonne			3	10	823	823
FRC2	FRC2			Franche-Comté				2	10	824	824
FRC21	FRC21				Doubs			3	10	825	825
FRC22	FRC22				Jura			3	10	826	826
FRC23	FRC23				Haute-Saône			3	10	827	827
FRC24	FRC24				Territoire de Belfort			3	10	828	828
FRD	FRD		Normandie					1	10	829	829
FRD1	FRD1			Basse-Normandie				2	10	830	830
FRD11	FRD11				Calvados			3	10	831	831
FRD12	FRD12				Manche			3	10	832	832
FRD13	FRD13				Orne			3	10	833	833
FRD2	FRD2			Haute-Normandie				2	10	834	834
FRD21	FRD21				Eure			3	10	835	835
FRD22	FRD22				Seine-Maritime			3	10	836	836
FRE	FRE		Hauts-de-France			1	name change	1	10	837	837
FRE1	FRE1			Nord-Pas de Calais				2	10	838	838
FRE11	FRE11				Nord			3	10	839	839
FRE12	FRE12				Pas-de-Calais			3	10	840	840
FRE2	FRE2			Picardie				2	10	841	841
FRE21	FRE21				Aisne			3	10	842	842
FRE22	FRE22				Oise			3	10	843	843
FRE23	FRE23				Somme			3	10	844	844
FRF	FRF		Grand Est			1	name change	1	10	845	845
FRF1	FRF1			Alsace				2	10	846	846
FRF11	FRF11				Bas-Rhin			3	10	847	847
FRF12	FRF12				Haut-Rhin			3	10	848	848
FRF2	FRF2			Champagne-Ardenne				2	10	849	849
FRF21	FRF21				Ardennes			3	10	850	850
FRF22	FRF22				Aube			3	10	851	851
FRF23	FRF23				Marne			3	10	852	852
FRF24	FRF24				Haute-Marne			3	10	853	853
FRF3	FRF3			Lorraine				2	10	854	854
FRF31	FRF31				Meurthe-et-Moselle			3	10	855	855
FRF32	FRF32				Meuse			3	10	856	856
FRF33	FRF33				Moselle			3	10	857	857
FRF34	FRF34				Vosges			3	10	858	858
FRG	FRG		Pays de la Loire					1	10	859	859
FRG0	FRG0			Pays de la Loire				2	10	860	860
FRG01	FRG01				Loire-Atlantique			3	10	861	861
FRG02	FRG02				Maine-et-Loire			3	10	862	862
FRG03	FRG03				Mayenne			3	10	863	863
FRG04	FRG04				Sarthe			3	10	864	864
FRG05	FRG05				Vendée			3	10	865	865
FRH	FRH		Bretagne					1	10	866	866
FRH0	FRH0			Bretagne				2	10	867	867
FRH01	FRH01				Côtes-d’Armor			3	10	868	868
FRH02	FRH02				Finistère			3	10	869	869
FRH03	FRH03				Ille-et-Vilaine			3	10	870	870
FRH04	FRH04				Morbihan			3	10	871	871
FRI	FRI		Nouvelle-Aquitaine			1	name change	1	10	872	872
FRI1	FRI1			Aquitaine				2	10	873	873
FRI11	FRI11				Dordogne			3	10	874	874
FRI12	FRI12				Gironde			3	10	875	875
FRI13	FRI13				Landes			3	10	876	876
FRI14	FRI14				Lot-et-Garonne			3	10	877	877
FRI15	FRI15				Pyrénées-Atlantiques			3	10	878	878
FRI2	FRI2			Limousin				2	10	879	879
FRI21	FRI21				Corrèze			3	10	880	880
FRI22	FRI22				Creuse			3	10	881	881
FRI23	FRI23				Haute-Vienne			3	10	882	882
FRI3	FRI3			Poitou-Charentes				2	10	883	883
FRI31	FRI31				Charente			3	10	884	884
FRI32	FRI32				Charente-Maritime			3	10	885	885
FRI33	FRI33				Deux-Sèvres			3	10	886	886
FRI34	FRI34				Vienne			3	10	887	887
FRJ	FRJ		Occitanie			1	name change	1	10	888	888
FRJ1	FRJ1			Languedoc-Roussillon				2	10	889	889
FRJ11	FRJ11				Aude			3	10	890	890
FRJ12	FRJ12				Gard			3	10	891	891
FRJ13	FRJ13				Hérault			3	10	892	892
FRJ14	FRJ14				Lozère			3	10	893	893
FRJ15	FRJ15				Pyrénées-Orientales			3	10	894	894
FRJ2	FRJ2			Midi-Pyrénées				2	10	895	895
FRJ21	FRJ21				Ariège			3	10	896	896
FRJ22	FRJ22				Aveyron			3	10	897	897
FRJ23	FRJ23				Haute-Garonne			3	10	898	898
FRJ24	FRJ24				Gers			3	10	899	899
FRJ25	FRJ25				Lot			3	10	900	900
FRJ26	FRJ26				Hautes-Pyrénées			3	10	901	901
FRJ27	FRJ27				Tarn			3	10	902	902
FRJ28	FRJ28				Tarn-et-Garonne			3	10	903	903
FRK	FRK		Auvergne-Rhône-Alpes					1	10	904	904
FRK1	FRK1			Auvergne				2	10	905	905
FRK11	FRK11				Allier			3	10	906	906
FRK12	FRK12				Cantal			3	10	907	907
FRK13	FRK13				Haute-Loire			3	10	908	908
FRK14	FRK14				Puy-de-Dôme			3	10	909	909
FRK2	FRK2			Rhône-Alpes				2	10	910	910
FRK21	FRK21				Ain			3	10	911	911
FRK22	FRK22				Ardèche			3	10	912	912
FRK23	FRK23				Drôme			3	10	913	913
FRK24	FRK24				Isère			3	10	914	914
FRK25	FRK25				Loire			3	10	915	915
FRK26	FRK26				Rhône			3	10	916	916
FRK27	FRK27				Savoie			3	10	917	917
FRK28	FRK28				Haute-Savoie			3	10	918	918
FRL	FRL		Provence-Alpes-Côte d’Azur					1	10	919	919
FRL0	FRL0			Provence-Alpes-Côte d’Azur				2	10	920	920
FRL01	FRL01				Alpes-de-Haute-Provence			3	10	921	921
FRL02	FRL02				Hautes-Alpes			3	10	922	922
FRL03	FRL03				Alpes-Maritimes			3	10	923	923
FRL04	FRL04				Bouches-du-Rhône			3	10	924	924
FRL05	FRL05				Var			3	10	925	925
FRL06	FRL06				Vaucluse			3	10	926	926
FRM	FRM		Corse					1	10	927	927
FRM0	FRM0			Corse				2	10	928	928
FRM01	FRM01				Corse-du-Sud			3	10	929	929
FRM02	FRM02				Haute-Corse			3	10	930	930
FRY	FRY		RUP FR — Régions Ultrapériphériques Françaises					1	10	931	931
FRY1	FRY1			Guadeloupe				2	10	932	932
FRY10	FRY10				Guadeloupe			3	10	933	933
FRY2	FRY2			Martinique				2	10	934	934
FRY20	FRY20				Martinique			3	10	935	935
FRY3	FRY3			Guyane				2	10	936	936
FRY30	FRY30				Guyane			3	10	937	937
FRY4	FRY4			La Réunion				2	10	938	938
FRY40	FRY40				La Réunion			3	10	939	939
FRY5	FRY5			Mayotte				2	10	940	940
FRY50	FRY50				Mayotte			3	10	941	941
FRZ	FRZ		Extra-Regio NUTS 1					1	10	942	942
FRZZ	FRZZ			Extra-Regio NUTS 2				2	10	943	943
FRZZZ	FRZZZ				Extra-Regio NUTS 3			3	10	944	944
HR	HR	Hrvatska						0	11	945	945
HR0	HR0		Hrvatska					1	11	946	946
HR03	HR03			Jadranska Hrvatska				2	11	947	947
HR031	HR031				Primorsko-goranska županija			3	11	948	948
HR032	HR032				Ličko-senjska županija			3	11	949	949
HR033	HR033				Zadarska županija			3	11	950	950
HR034	HR034				Šibensko-kninska županija			3	11	951	951
HR035	HR035				Splitsko-dalmatinska županija			3	11	952	952
HR036	HR036				Istarska županija			3	11	953	953
HR037	HR037				Dubrovačko-neretvanska županija			3	11	954	954
HR04				Kontinentalna Hrvatska		5	discontinued; split into new HR02, HR05 and HR06	2	11	955	955
	HR05			Grad Zagreb		6	new	2	11		956
HR041	HR050				Grad Zagreb	2	recoded (reassignment)	3	11	956	957
	HR06			Sjeverna Hrvatska		6	new	2	11		958
HR046	HR061				Međimurska županija	2	recoded (reassignment)	3	11	961	959
HR044	HR062				Varaždinska županija	2	recoded (reassignment)	3	11	959	960
HR045	HR063				Koprivničko-križevačka županija	2	recoded (reassignment)	3	11	960	961
HR043	HR064				Krapinsko-zagorska županija	2	recoded (reassignment)	3	11	958	962
HR042	HR065				Zagrebačka županija	2	recoded (reassignment)	3	11	957	963
	HR02			Panonska Hrvatska		6	new	2	11		964
HR047	HR021				Bjelovarsko-bilogorska županija	2	recoded (reassignment)	3	11	962	965
HR048	HR022				Virovitičko-podravska županija	2	recoded (reassignment)	3	11	963	966
HR049	HR023				Požeško-slavonska županija	2	recoded (reassignment)	3	11	964	967
HR04A	HR024				Brodsko-posavska županija	2	recoded (reassignment)	3	11	965	968
HR04B	HR025				Osječko-baranjska županija	2	recoded (reassignment)	3	11	966	969
HR04C	HR026				Vukovarsko-srijemska županija	2	recoded (reassignment)	3	11	967	970
HR04D	HR027				Karlovačka županija	2	recoded (reassignment)	3	11	968	971
HR04E	HR028				Sisačko-moslavačka županija	2	recoded (reassignment)	3	11	969	972
HRZ	HRZ		Extra-Regio NUTS 1					1	11	970	973
HRZZ	HRZZ			Extra-Regio NUTS 2				2	11	971	974
HRZZZ	HRZZZ				Extra-Regio NUTS 3			3	11	972	974
IT	IT	Italia						0	12	973	975
ITC	ITC		Nord-Ovest					1	12	974	976
ITC1	ITC1			Piemonte				2	12	975	977
ITC11	ITC11				Torino			3	12	976	978
ITC12	ITC12				Vercelli			3	12	977	979
ITC13	ITC13				Biella			3	12	978	980
ITC14	ITC14				Verbano-Cusio-Ossola			3	12	979	981
ITC15	ITC15				Novara			3	12	980	982
ITC16	ITC16				Cuneo			3	12	981	983
ITC17	ITC17				Asti			3	12	982	984
ITC18	ITC18				Alessandria			3	12	983	985
ITC2	ITC2			Valle d’Aosta/Vallée d’Aoste				2	12	984	986
ITC20	ITC20				Valle d’Aosta/Vallée d’Aoste			3	12	985	987
ITC3	ITC3			Liguria				2	12	986	988
ITC31	ITC31				Imperia			3	12	987	989
ITC32	ITC32				Savona			3	12	988	990
ITC33	ITC33				Genova			3	12	989	991
ITC34	ITC34				La Spezia			3	12	990	992
ITC4	ITC4			Lombardia				2	12	991	993
ITC41	ITC41				Varese			3	12	992	994
ITC42	ITC42				Como			3	12	993	995
ITC43	ITC43				Lecco			3	12	994	996
ITC44	ITC44				Sondrio			3	12	995	997
ITC46	ITC46				Bergamo			3	12	996	998
ITC47	ITC47				Brescia			3	12	997	999
ITC48	ITC48				Pavia			3	12	998	1000
ITC49	ITC49				Lodi			3	12	999	1001
ITC4A	ITC4A				Cremona			3	12	1000	1002
ITC4B	ITC4B				Mantova			3	12	1001	1003
ITC4C	ITC4C				Milano			3	12	1002	1004
ITC4D	ITC4D				Monza e della Brianza			3	12	1003	1005
ITF	ITF		Sud					1	12	1004	1006
ITF1	ITF1			Abruzzo				2	12	1005	1007
ITF11	ITF11				L’Aquila			3	12	1006	1008
ITF12	ITF12				Teramo			3	12	1007	1009
ITF13	ITF13				Pescara			3	12	1008	1010
ITF14	ITF14				Chieti			3	12	1009	1011
ITF2	ITF2			Molise				2	12	1010	1012
ITF21	ITF21				Isernia			3	12	1011	1013
ITF22	ITF22				Campobasso			3	12	1012	1014
ITF3	ITF3			Campania				2	12	1013	1015
ITF31	ITF31				Caserta			3	12	1014	1016
ITF32	ITF32				Benevento			3	12	1015	1017
ITF33	ITF33				Napoli			3	12	1016	1018
ITF34	ITF34				Avellino			3	12	1017	1019
ITF35	ITF35				Salerno			3	12	1018	1020
ITF4	ITF4			Puglia				2	12	1019	1021
ITF43	ITF43				Taranto			3	12	1020	1022
ITF44	ITF44				Brindisi			3	12	1021	1023
ITF45	ITF45				Lecce			3	12	1022	1024
ITF46	ITF46				Foggia			3	12	1023	1025
ITF47	ITF47				Bari			3	12	1024	1026
ITF48	ITF48				Barletta-Andria-Trani			3	12	1025	1027
ITF5	ITF5			Basilicata				2	12	1026	1028
ITF51	ITF51				Potenza			3	12	1027	1029
ITF52	ITF52				Matera			3	12	1028	1030
ITF6	ITF6			Calabria				2	12	1029	1031
ITF61	ITF61				Cosenza			3	12	1030	1032
ITF62	ITF62				Crotone			3	12	1031	1033
ITF63	ITF63				Catanzaro			3	12	1032	1034
ITF64	ITF64				Vibo Valentia			3	12	1033	1035
ITF65	ITF65				Reggio di Calabria			3	12	1034	1036
ITG	ITG		Isole					1	12	1035	1037
ITG1	ITG1			Sicilia				2	12	1036	1038
ITG11	ITG11				Trapani			3	12	1037	1039
ITG12	ITG12				Palermo			3	12	1038	1040
ITG13	ITG13				Messina			3	12	1039	1041
ITG14	ITG14				Agrigento			3	12	1040	1042
ITG15	ITG15				Caltanissetta			3	12	1041	1043
ITG16	ITG16				Enna			3	12	1042	1044
ITG17	ITG17				Catania			3	12	1043	1045
ITG18	ITG18				Ragusa			3	12	1044	1046
ITG19	ITG19				Siracusa			3	12	1045	1047
ITG2	ITG2			Sardegna				2	12	1046	1048
ITG29					Olbia-Tempio	5	discontinued	3	12	1051
ITG2A					Ogliastra	5	discontinued	3	12	1052
ITG2B					Medio Campidano	5	discontinued	3	12	1053
ITG2C					Carbonia-Iglesias	5	discontinued	3	12	1054
ITG25	ITG2D				Sassari	3	recode, boundary change: merge of ex-ITG25 and ex-ITG29	3	12	1047	1049
ITG26	ITG2E				Nuoro	3	recode, boundary change: merge of ex-ITG26 plus most parts of ex-ITG2A	3	12	1048	1050
ITG27	ITG2F				Cagliari	3	recode, boundary change: made of smaller part of ex-ITG27	3	12	1049	1051
ITG28	ITG2G				Oristano	3	recode, boundary change: lost small part to new ITG2H	3	12	1050	1052
	ITG2H				Sud Sardegna	6	new region, made of most parts of ex-ITG27, small part of ex-ITG28, small part of ex-ITG2A, ex-ITG2B and ex-ITG2C	3	12		1053
ITH	ITH		Nord-Est					1	12	1055	1054
ITH1	ITH1			Provincia Autonoma di Bolzano/Bozen				2	12	1056	1055
ITH10	ITH10				Bolzano-Bozen			3	12	1057	1056
ITH2	ITH2			Provincia Autonoma di Trento				2	12	1058	1057
ITH20	ITH20				Trento			3	12	1059	1058
ITH3	ITH3			Veneto				2	12	1060	1059
ITH31	ITH31				Verona			3	12	1061	1060
ITH32	ITH32				Vicenza			3	12	1062	1061
ITH33	ITH33				Belluno			3	12	1063	1062
ITH34	ITH34				Treviso			3	12	1064	1063
ITH35	ITH35				Venezia			3	12	1065	1064
ITH36	ITH36				Padova			3	12	1066	1065
ITH37	ITH37				Rovigo			3	12	1067	1066
ITH4	ITH4			Friuli-Venezia Giulia				2	12	1068	1067
ITH41	ITH41				Pordenone			3	12	1069	1068
ITH42	ITH42				Udine			3	12	1070	1069
ITH43	ITH43				Gorizia			3	12	1071	1070
ITH44	ITH44				Trieste			3	12	1072	1071
ITH5	ITH5			Emilia-Romagna				2	12	1073	1072
ITH51	ITH51				Piacenza			3	12	1074	1073
ITH52	ITH52				Parma			3	12	1075	1074
ITH53	ITH53				Reggio nell’Emilia			3	12	1076	1075
ITH54	ITH54				Modena			3	12	1077	1076
ITH55	ITH55				Bologna			3	12	1078	1077
ITH56	ITH56				Ferrara			3	12	1079	1078
ITH57	ITH57				Ravenna			3	12	1080	1079
ITH58	ITH58				Forlì-Cesena			3	12	1081	1080
ITH59	ITH59				Rimini			3	12	1082	1081
ITI	ITI		Centro (IT)					1	12	1083	1082
ITI1	ITI1			Toscana				2	12	1084	1083
ITI11	ITI11				Massa-Carrara			3	12	1085	1084
ITI12	ITI12				Lucca			3	12	1086	1085
ITI13	ITI13				Pistoia			3	12	1087	1086
ITI14	ITI14				Firenze			3	12	1088	1087
ITI15	ITI15				Prato			3	12	1089	1088
ITI16	ITI16				Livorno			3	12	1090	1089
ITI17	ITI17				Pisa			3	12	1091	1090
ITI18	ITI18				Arezzo			3	12	1092	1091
ITI19	ITI19				Siena			3	12	1093	1092
ITI1A	ITI1A				Grosseto			3	12	1094	1093
ITI2	ITI2			Umbria				2	12	1095	1094
ITI21	ITI21				Perugia			3	12	1096	1095
ITI22	ITI22				Terni			3	12	1097	1096
ITI3	ITI3			Marche				2	12	1098	1097
ITI31	ITI31				Pesaro e Urbino			3	12	1099	1098
ITI32	ITI32				Ancona			3	12	1100	1099
ITI33	ITI33				Macerata			3	12	1101	1100
ITI34	ITI34				Ascoli Piceno			3	12	1102	1101
ITI35	ITI35				Fermo			3	12	1103	1102
ITI4	ITI4			Lazio				2	12	1104	1103
ITI41	ITI41				Viterbo			3	12	1105	1104
ITI42	ITI42				Rieti			3	12	1106	1105
ITI43	ITI43				Roma			3	12	1107	1106
ITI44	ITI44				Latina			3	12	1108	1107
ITI45	ITI45				Frosinone			3	12	1109	1108
ITZ	ITZ		Extra-Regio NUTS 1					1	12	1110	1109
ITZZ	ITZZ			Extra-Regio NUTS 2				2	12	1111	1110
ITZZZ	ITZZZ				Extra-Regio NUTS 3			3	12	1112	1111
CY	CY	Κύπρος						0	13	1113	1112
CY0	CY0		Κύπρος					1	13	1114	1113
CY00	CY00			Κύπρος				2	13	1115	1114
CY000	CY000				Κύπρος			3	13	1116	1115
CYZ	CYZ		Extra-Regio NUTS 1					1	13	1117	1116
CYZZ	CYZZ			Extra-Regio NUTS 2				2	13	1118	1117
CYZZZ	CYZZZ				Extra-Regio NUTS 3			3	13	1119	1118
LV	LV	Latvija						0	14	1120	1119
LV0	LV0		Latvija					1	14	1121	1120
LV00	LV00			Latvija				2	14	1122	1121
LV003	LV003				Kurzeme			3	14	1123	1122
LV005	LV005				Latgale			3	14	1124	1123
LV006	LV006				Rīga			3	14	1125	1124
LV007	LV007				Pierīga			3	14	1126	1125
LV008	LV008				Vidzeme			3	14	1127	1126
LV009	LV009				Zemgale			3	14	1128	1127
LVZ	LVZ		Extra-Regio NUTS 1					1	14	1129	1128
LVZZ	LVZZ			Extra-Regio NUTS 2				2	14	1130	1129
LVZZZ	LVZZZ				Extra-Regio NUTS 3			3	14	1131	1130
LT	LT	Lietuva						0	15	1132	1131
LT0	LT0		Lietuva					1	15	1133	1132
LT01	LT01			Sostinės regionas				2	15	1134	1133
LT011	LT011				Vilniaus apskritis			3	15	1135	1134
LT02	LT02			Vidurio ir vakarų Lietuvos regionas				2	15	1136	1135
LT021	LT021				Alytaus apskritis			3	15	1137	1136
LT022	LT022				Kauno apskritis			3	15	1138	1137
LT023	LT023				Klaipėdos apskritis			3	15	1139	1138
LT024	LT024				Marijampolės apskritis			3	15	1140	1139
LT025	LT025				Panevėžio apskritis			3	15	1141	1140
LT026	LT026				Šiaulių apskritis			3	15	1142	1141
LT027	LT027				Tauragės apskritis			3	15	1143	1142
LT028	LT028				Telšių apskritis			3	15	1144	1143
LT029	LT029				Utenos apskritis			3	15	1145	1144
LTZ	LTZ		Extra-Regio NUTS 1					1	15	1146	1145
LTZZ	LTZZ			Extra-Regio NUTS 2				2	15	1147	1146
LTZZZ	LTZZZ				Extra-Regio NUTS 3			3	15	1148	1147
LU	LU	Luxembourg						0	16	1149	1148
LU0	LU0		Luxembourg					1	16	1150	1149
LU00	LU00			Luxembourg				2	16	1151	1150
LU000	LU000				Luxembourg			3	16	1152	1151
LUZ	LUZ		Extra-Regio NUTS 1					1	16	1153	1152
LUZZ	LUZZ			Extra-Regio NUTS 2				2	16	1154	1153
LUZZZ	LUZZZ				Extra-Regio NUTS 3			3	16	1155	1154
HU	HU	Magyarország						0	17	1156	1155
HU1	HU1		Közép-Magyarország					1	17	1157	1156
HU11	HU11			Budapest				2	17	1158	1157
HU110	HU110				Budapest			3	17	1159	1158
HU12	HU12			Pest				2	17	1160	1159
HU120	HU120				Pest			3	17	1161	1160
HU2	HU2		Dunántúl					1	17	1162	1161
HU21	HU21			Közép-Dunántúl				2	17	1163	1162
HU211	HU211				Fejér			3	17	1164	1163
HU212	HU212				Komárom-Esztergom			3	17	1165	1164
HU213	HU213				Veszprém			3	17	1166	1165
HU22	HU22			Nyugat-Dunántúl				2	17	1167	1166
HU221	HU221				Győr-Moson-Sopron			3	17	1168	1167
HU222	HU222				Vas			3	17	1169	1168
HU223	HU223				Zala			3	17	1170	1169
HU23	HU23			Dél-Dunántúl				2	17	1171	1170
HU231	HU231				Baranya			3	17	1172	1171
HU232	HU232				Somogy			3	17	1173	1172
HU233	HU233				Tolna			3	17	1174	1173
HU3	HU3		Alföld és Észak					1	17	1175	1174
HU31	HU31			Észak-Magyarország				2	17	1176	1175
HU311	HU311				Borsod-Abaúj-Zemplén			3	17	1177	1176
HU312	HU312				Heves			3	17	1178	1177
HU313	HU313				Nógrád			3	17	1179	1178
HU32	HU32			Észak-Alföld				2	17	1180	1179
HU321	HU321				Hajdú-Bihar			3	17	1181	1180
HU322	HU322				Jász-Nagykun-Szolnok			3	17	1182	1181
HU323	HU323				Szabolcs-Szatmár-Bereg			3	17	1183	1182
HU33	HU33			Dél-Alföld				2	17	1184	1183
HU331	HU331				Bács-Kiskun			3	17	1185	1184
HU332	HU332				Békés			3	17	1186	1185
HU333	HU333				Csongrád			3	17	1187	1186
HUZ	HUZ		Extra-Regio NUTS 1					1	17	1188	1187
HUZZ	HUZZ			Extra-Regio NUTS 2				2	17	1189	1188
HUZZZ	HUZZZ				Extra-Regio NUTS 3			3	17	1190	1189
MT	MT	Malta						0	18	1191	1190
MT0	MT0		Malta					1	18	1192	1191
MT00	MT00			Malta				2	18	1193	1192
MT001	MT001				Malta			3	18	1194	1193
MT002	MT002				Gozo and Comino/Għawdex u Kemmuna			3	18	1195	1194
MTZ	MTZ		Extra-Regio NUTS 1					1	18	1196	1195
MTZZ	MTZZ			Extra-Regio NUTS 2				2	18	1197	1196
MTZZZ	MTZZZ				Extra-Regio NUTS 3			3	18	1198	1197
NL	NL	Nederland						0	19	1199	1198
NL1	NL1		Noord-Nederland					1	19	1200	1199
NL11	NL11			Groningen				2	19	1201	1200
NL111	NL111				Oost-Groningen			3	19	1202	1201
NL112	NL112				Delfzijl en omgeving			3	19	1203	1202
NL113	NL113				Overig Groningen			3	19	1204	1203
NL12	NL12			Friesland (NL)				2	19	1205	1204
NL124	NL124				Noord-Friesland			3	19	1206	1205
NL125	NL125				Zuidwest-Friesland			3	19	1207	1206
NL126	NL126				Zuidoost-Friesland			3	19	1208	1207
NL13	NL13			Drenthe				2	19	1209	1208
NL131	NL131				Noord-Drenthe			3	19	1210	1209
NL132	NL132				Zuidoost-Drenthe			3	19	1211	1210
NL133	NL133				Zuidwest-Drenthe			3	19	1212	1211
NL2	NL2		Oost-Nederland					1	19	1213	1212
NL21	NL21			Overijssel				2	19	1214	1213
NL211	NL211				Noord-Overijssel			3	19	1215	1214
NL212	NL212				Zuidwest-Overijssel			3	19	1216	1215
NL213	NL213				Twente			3	19	1217	1216
NL22	NL22			Gelderland				2	19	1218	1217
NL221	NL221				Veluwe			3	19	1219	1218
NL224	NL224				Zuidwest-Gelderland			3	19	1220	1219
NL225	NL225				Achterhoek			3	19	1221	1220
NL226	NL226				Arnhem/Nijmegen			3	19	1222	1221
NL23	NL23			Flevoland				2	19	1223	1222
NL230	NL230				Flevoland			3	19	1224	1223
NL3	NL3		West-Nederland					1	19	1225	1224
NL31	NL31			Utrecht				2	19	1226	1225
NL310	NL310				Utrecht			3	19	1227	1226
NL32	NL32			Noord-Holland				2	19	1228	1227
NL321	NL321				Kop van Noord-Holland			3	19	1229	1228
NL323	NL323				IJmond			3	19	1230	1229
NL324	NL324				Agglomeratie Haarlem			3	19	1231	1230
NL325	NL325				Zaanstreek			3	19	1232	1231
NL327	NL327				Het Gooi en Vechtstreek			3	19	1233	1232
NL328	NL328				Alkmaar en omgeving			3	19	1234	1233
NL329	NL329				Groot-Amsterdam			3	19	1235	1234
NL33	NL33			Zuid-Holland				2	19	1236	1235
NL332	NL332				Agglomeratie ’s-Gravenhage			3	19	1237	1236
NL333	NL333				Delft en Westland			3	19	1238	1237
NL337	NL337				Agglomeratie Leiden en Bollenstreek			3	19	1239	1238
NL33A	NL33A				Zuidoost-Zuid-Holland			3	19	1240	1239
NL33B	NL33B				Oost-Zuid-Holland			3	19	1241	1240
NL33C	NL33C				Groot-Rijnmond			3	19	1242	1241
NL34	NL34			Zeeland				2	19	1243	1242
NL341	NL341				Zeeuwsch-Vlaanderen			3	19	1244	1243
NL342	NL342				Overig Zeeland			3	19	1245	1244
NL4	NL4		Zuid-Nederland					1	19	1246	1245
NL41	NL41			Noord-Brabant				2	19	1247	1246
NL411	NL411				West-Noord-Brabant			3	19	1248	1247
NL412	NL412				Midden-Noord-Brabant			3	19	1249	1248
NL413	NL413				Noordoost-Noord-Brabant			3	19	1250	1249
NL414	NL414				Zuidoost-Noord-Brabant			3	19	1251	1250
NL42	NL42			Limburg (NL)				2	19	1252	1251
NL421	NL421				Noord-Limburg			3	19	1253	1252
NL422	NL422				Midden-Limburg			3	19	1254	1253
NL423	NL423				Zuid-Limburg			3	19	1255	1254
NLZ	NLZ		Extra-Regio NUTS 1					1	19	1256	1255
NLZZ	NLZZ			Extra-Regio NUTS 2				2	19	1257	1256
NLZZZ	NLZZZ				Extra-Regio NUTS 3			3	19	1258	1257
AT	AT	Österreich						0	20	1259	1258
AT1	AT1		Ostösterreich					1	20	1260	1259
AT11	AT11			Burgenland				2	20	1261	1260
AT111	AT111				Mittelburgenland			3	20	1262	1261
AT112	AT112				Nordburgenland			3	20	1263	1262
AT113	AT113				Südburgenland			3	20	1264	1263
AT12	AT12			Niederösterreich				2	20	1265	1264
AT121	AT121				Mostviertel-Eisenwurzen			3	20	1266	1265
AT122	AT122				Niederösterreich-Süd			3	20	1267	1266
AT123	AT123				Sankt Pölten			3	20	1268	1267
AT124	AT124				Waldviertel			3	20	1269	1268
AT125	AT125				Weinviertel			3	20	1270	1269
AT126	AT126				Wiener Umland/Nordteil			3	20	1271	1270
AT127	AT127				Wiener Umland/Südteil			3	20	1272	1271
AT13	AT13			Wien				2	20	1273	1272
AT130	AT130				Wien			3	20	1274	1273
AT2	AT2		Südösterreich					1	20	1275	1274
AT21	AT21			Kärnten				2	20	1276	1275
AT211	AT211				Klagenfurt-Villach			3	20	1277	1276
AT212	AT212				Oberkärnten			3	20	1278	1277
AT213	AT213				Unterkärnten			3	20	1279	1278
AT22	AT22			Steiermark				2	20	1280	1279
AT221	AT221				Graz			3	20	1281	1280
AT222	AT222				Liezen			3	20	1282	1281
AT223	AT223				Östliche Obersteiermark			3	20	1283	1282
AT224	AT224				Oststeiermark			3	20	1284	1283
AT225	AT225				West- und Südsteiermark			3	20	1285	1284
AT226	AT226				Westliche Obersteiermark			3	20	1286	1285
AT3	AT3		Westösterreich					1	20	1287	1286
AT31	AT31			Oberösterreich				2	20	1288	1287
AT311	AT311				Innviertel			3	20	1289	1288
AT312	AT312				Linz-Wels			3	20	1290	1289
AT313	AT313				Mühlviertel			3	20	1291	1290
AT314	AT314				Steyr-Kirchdorf			3	20	1292	1291
AT315	AT315				Traunviertel			3	20	1293	1292
AT32	AT32			Salzburg				2	20	1294	1293
AT321	AT321				Lungau			3	20	1295	1294
AT322	AT322				Pinzgau-Pongau			3	20	1296	1295
AT323	AT323				Salzburg und Umgebung			3	20	1297	1296
AT33	AT33			Tirol				2	20	1298	1297
AT331	AT331				Außerfern			3	20	1299	1298
AT332	AT332				Innsbruck			3	20	1300	1299
AT333	AT333				Osttirol			3	20	1301	1300
AT334	AT334				Tiroler Oberland			3	20	1302	1301
AT335	AT335				Tiroler Unterland			3	20	1303	1302
AT34	AT34			Vorarlberg				2	20	1304	1303
AT341	AT341				Bludenz-Bregenzer Wald			3	20	1305	1304
AT342	AT342				Rheintal-Bodenseegebiet			3	20	1306	1305
ATZ	ATZ		Extra-Regio NUTS 1					1	20	1307	1306
ATZZ	ATZZ			Extra-Regio NUTS 2				2	20	1308	1307
ATZZZ	ATZZZ				Extra-Regio NUTS 3			3	20	1309	1308
PL	PL	Polska						0	21	1310	1309
PL2	PL2		Makroregion południowy					1	21	1311	1310
PL21	PL21			Małopolskie				2	21	1312	1311
PL213	PL213				Miasto Kraków			3	21	1313	1312
PL214	PL214				Krakowski			3	21	1314	1313
PL217	PL217				Tarnowski			3	21	1315	1314
PL218	PL218				Nowosądecki			3	21	1316	1315
PL219	PL219				Nowotarski			3	21	1317	1316
PL21A	PL21A				Oświęcimski			3	21	1318	1317
PL22	PL22			Śląskie				2	21	1319	1318
PL224	PL224				Częstochowski			3	21	1320	1319
PL225	PL225				Bielski			3	21	1321	1320
PL227	PL227				Rybnicki			3	21	1322	1321
PL228	PL228				Bytomski			3	21	1323	1322
PL229	PL229				Gliwicki			3	21	1324	1323
PL22A	PL22A				Katowicki			3	21	1325	1324
PL22B	PL22B				Sosnowiecki			3	21	1326	1325
PL22C	PL22C				Tyski			3	21	1327	1326
PL4	PL4		Makroregion północno-zachodni					1	21	1328	1327
PL41	PL41			Wielkopolskie				2	21	1329	1328
PL411	PL411				Pilski			3	21	1330	1329
PL414	PL414				Koniński			3	21	1331	1330
PL415	PL415				Miasto Poznań			3	21	1332	1331
PL416	PL416				Kaliski			3	21	1333	1332
PL417	PL417				Leszczyński			3	21	1334	1333
PL418	PL418				Poznański			3	21	1335	1334
PL42	PL42			Zachodniopomorskie				2	21	1336	1335
PL424	PL424				Miasto Szczecin			3	21	1337	1336
PL426	PL426				Koszaliński			3	21	1338	1337
PL427	PL427				Szczecinecko-pyrzycki			3	21	1339	1338
PL428	PL428				Szczeciński			3	21	1340	1339
PL43	PL43			Lubuskie				2	21	1341	1340
PL431	PL431				Gorzowski			3	21	1342	1341
PL432	PL432				Zielonogórski			3	21	1343	1342
PL5	PL5		Makroregion południowo-zachodni					1	21	1344	1343
PL51	PL51			Dolnośląskie				2	21	1345	1344
PL514	PL514				Miasto Wrocław			3	21	1346	1345
PL515	PL515				Jeleniogórski			3	21	1347	1346
PL516	PL516				Legnicko-głogowski			3	21	1348	1347
PL517	PL517				Wałbrzyski			3	21	1349	1348
PL518	PL518				Wrocławski			3	21	1350	1349
PL52	PL52			Opolskie				2	21	1351	1350
PL523	PL523				Nyski			3	21	1352	1351
PL524	PL524				Opolski			3	21	1353	1352
PL6	PL6		Makroregion północny					1	21	1354	1353
PL61	PL61			Kujawsko-pomorskie				2	21	1355	1354
PL613	PL613				Bydgosko-toruński			3	21	1356	1355
PL616	PL616				Grudziądzki			3	21	1357	1356
PL617	PL617				Inowrocławski			3	21	1358	1357
PL618	PL618				Świecki			3	21	1359	1358
PL619	PL619				Włocławski			3	21	1360	1359
PL62	PL62			Warmińsko-mazurskie				2	21	1361	1360
PL621	PL621				Elbląski			3	21	1362	1361
PL622	PL622				Olsztyński			3	21	1363	1362
PL623	PL623				Ełcki			3	21	1364	1363
PL63	PL63			Pomorskie				2	21	1365	1364
PL633	PL633				Trójmiejski			3	21	1366	1365
PL634	PL634				Gdański			3	21	1367	1366
PL636	PL636				Słupski			3	21	1368	1367
PL637	PL637				Chojnicki			3	21	1369	1368
PL638	PL638				Starogardzki			3	21	1370	1369
PL7	PL7		Makroregion centralny					1	21	1371	1370
PL71	PL71			Łódzkie				2	21	1372	1371
PL711	PL711				Miasto Łódź			3		1373	1372
PL712	PL712				Łódzki			3	21	1374	1373
PL713	PL713				Piotrkowski			3	21	1375	1374
PL714	PL714				Sieradzki			3	21	1376	1375
PL715	PL715				Skierniewicki			3	21	1377	1376
PL72	PL72			Świętokrzyskie				2	21	1378	1377
PL721	PL721				Kielecki			3	21	1379	1378
PL722	PL722				Sandomiersko-jędrzejowski			3	21	1380	1379
PL8	PL8		Makroregion wschodni					1	21	1381	1380
PL81	PL81			Lubelskie				2	21	1382	1381
PL811	PL811				Bialski			3	21	1383	1382
PL812	PL812				Chełmsko-zamojski			3	21	1384	1383
PL814	PL814				Lubelski			3	21	1385	1384
PL815	PL815				Puławski			3	21	1386	1385
PL82	PL82			Podkarpackie				2	21	1387	1386
PL821	PL821				Krośnieński			3	21	1388	1387
PL822	PL822				Przemyski			3	21	1389	1388
PL823	PL823				Rzeszowski			3	21	1390	1389
PL824	PL824				Tarnobrzeski			3	21	1391	1390
PL84	PL84			Podlaskie				2	21	1392	1391
PL841	PL841				Białostocki			3	21	1393	1392
PL842	PL842				Łomżyński			3	21	1394	1393
PL843	PL843				Suwalski			3	21	1395	1394
PL9	PL9		Makroregion województwo mazowieckie					1	21	1396	1395
PL91	PL91			Warszawski stołeczny				2	21	1397	1396
PL911	PL911				Miasto Warszawa			3	21	1398	1397
PL912	PL912				Warszawski wschodni			3	21	1399	1398
PL913	PL913				Warszawski zachodni			3	21	1400	1399
PL92	PL92			Mazowiecki regionalny				2	21	1401	1400
PL921	PL921				Radomski			3	21	1402	1401
PL922	PL922				Ciechanowski			3	21	1403	1402
PL923	PL923				Płocki			3	21	1404	1403
PL924	PL924				Ostrołęcki			3	21	1405	1404
PL925	PL925				Siedlecki			3	21	1406	1405
PL926	PL926				Żyrardowski			3	21	1407	1406
PLZ	PLZ		Extra-Regio NUTS 1					1	21	1408	1407
PLZZ	PLZZ			Extra-Regio NUTS 2				2	21	1409	1408
PLZZZ	PLZZZ				Extra-Regio NUTS 3			3	21	1410	1409
PT	PT	Portugal						0	22	1411	1410
PT1	PT1		Continente					1	22	1412	1411
PT11	PT11			Norte				2	22	1413	1412
PT111	PT111				Alto Minho			3	22	1414	1413
PT112	PT112				Cávado			3	22	1415	1414
PT119	PT119				Ave			3	22	1416	1415
PT11A	PT11A				Área Metropolitana do Porto			3	22	1417	1416
PT11B	PT11B				Alto Tâmega			3	22	1418	1417
PT11C	PT11C				Tâmega e Sousa			3	22	1419	1418
PT11D	PT11D				Douro			3	22	1420	1419
PT11E	PT11E				Terras de Trás-os-Montes			3	22	1421	1420
PT15	PT15			Algarve				2	22	1422	1421
PT150	PT150				Algarve			3	22	1423	1422
PT16	PT16			Centro (PT)				2	22	1424	1423
PT16B	PT16B				Oeste			3	22	1425	1424
PT16D	PT16D				Região de Aveiro			3	22	1426	1425
PT16E	PT16E				Região de Coimbra			3	22	1427	1426
PT16F	PT16F				Região de Leiria			3	22	1428	1427
PT16G	PT16G				Viseu Dão Lafões			3	22	1429	1428
PT16H	PT16H				Beira Baixa			3	22	1430	1429
PT16I	PT16I				Médio Tejo			3	22	1431	1430
PT16J	PT16J				Beiras e Serra da Estrela			3	22	1432	1431
PT17	PT17			Área Metropolitana de Lisboa				2	22	1433	1432
PT170	PT170				Área Metropolitana de Lisboa			3	22	1434	1433
PT18	PT18			Alentejo				2	22	1435	1434
PT181	PT181				Alentejo Litoral			3	22	1436	1435
PT184	PT184				Baixo Alentejo			3	22	1437	1436
PT185	PT185				Lezíria do Tejo			3	22	1438	1437
PT186	PT186				Alto Alentejo			3	22	1439	1438
PT187	PT187				Alentejo Central			3	22	1440	1439
PT2	PT2		Região Autónoma dos Açores					1	22	1441	1440
PT20	PT20			Região Autónoma dos Açores				2	22	1442	1441
PT200	PT200				Região Autónoma dos Açores			3	22	1443	1442
PT3	PT3		Região Autónoma da Madeira					1	22	1444	1443
PT30	PT30			Região Autónoma da Madeira				2	22	1445	1444
PT300	PT300				Região Autónoma da Madeira			3	22	1446	1445
PTZ	PTZ		Extra-Regio NUTS 1					1	22	1447	1446
PTZZ	PTZZ			Extra-Regio NUTS 2				2	22	1448	1447
PTZZZ	PTZZZ				Extra-Regio NUTS 3			3	22	1449	1448
RO	RO	România						0	23	1450	1449
RO1	RO1		Macroregiunea Unu					1	23	1451	1450
RO11	RO11			Nord-Vest				2	23	1452	1451
RO111	RO111				Bihor			3	23	1453	1452
RO112	RO112				Bistriţa-Năsăud			3	23	1454	1453
RO113	RO113				Cluj			3	23	1455	1454
RO114	RO114				Maramureş			3	23	1456	1455
RO115	RO115				Satu Mare			3	23	1457	1456
RO116	RO116				Sălaj			3	23	1458	1457
RO12	RO12			Centru				2	23	1459	1458
RO121	RO121				Alba			3	23	1460	1459
RO122	RO122				Braşov			3	23	1461	1460
RO123	RO123				Covasna			3	23	1462	1461
RO124	RO124				Harghita			3	23	1463	1462
RO125	RO125				Mureş			3	23	1464	1463
RO126	RO126				Sibiu			3	23	1465	1464
RO2	RO2		Macroregiunea Doi					1	23	1466	1465
RO21	RO21			Nord-Est				2	23	1467	1466
RO211	RO211				Bacău			3	23	1468	1467
RO212	RO212				Botoşani			3	23	1469	1468
RO213	RO213				Iaşi			3	23	1470	1469
RO214	RO214				Neamţ			3	23	1471	1470
RO215	RO215				Suceava			3	23	1472	1471
RO216	RO216				Vaslui			3	23	1473	1472
RO22	RO22			Sud-Est				2	23	1474	1473
RO221	RO221				Brăila			3	23	1475	1474
RO222	RO222				Buzău			3	23	1476	1475
RO223	RO223				Constanţa			3	23	1477	1476
RO224	RO224				Galaţi			3	23	1478	1477
RO225	RO225				Tulcea			3	23	1479	1478
RO226	RO226				Vrancea			3	23	1480	1479
RO3	RO3		Macroregiunea Trei					1	23	1481	1480
RO31	RO31			Sud-Muntenia				2	23	1482	1481
RO311	RO311				Argeş			3	23	1483	1482
RO312	RO312				Călăraşi			3	23	1484	1483
RO313	RO313				Dâmboviţa			3	23	1485	1484
RO314	RO314				Giurgiu			3	23	1486	1485
RO315	RO315				Ialomiţa			3	23	1487	1486
RO316	RO316				Prahova			3	23	1488	1487
RO317	RO317				Teleorman			3	23	1489	1488
RO32	RO32			Bucureşti-Ilfov				2	23	1490	1489
RO321	RO321				Bucureşti			3	23	1491	1490
RO322	RO322				Ilfov			3	23	1492	1491
RO4	RO4		Macroregiunea Patru					1	23	1493	1492
RO41	RO41			Sud-Vest Oltenia				2	23	1494	1493
RO411	RO411				Dolj			3	23	1495	1494
RO412	RO412				Gorj			3	23	1496	1495
RO413	RO413				Mehedinţi			3	23	1497	1496
RO414	RO414				Olt			3	23	1498	1497
RO415	RO415				Vâlcea			3	23	1499	1498
RO42	RO42			Vest				2	23	1500	1499
RO421	RO421				Arad			3	23	1501	1500
RO422	RO422				Caraş-Severin			3	23	1502	1501
RO423	RO423				Hunedoara			3	23	1503	1502
RO424	RO424				Timiş			3	23	1504	1503
ROZ	ROZ		Extra-Regio NUTS 1					1	23	1505	1504
ROZZ	ROZZ			Extra-Regio NUTS 2				2	23	1506	1505
ROZZZ	ROZZZ				Extra-Regio NUTS 3			3	23	1507	1506
SI	SI	Slovenija						0	24	1508	1507
SI0	SI0		Slovenija					1	24	1509	1508
SI03	SI03			Vzhodna Slovenija				2	24	1510	1509
SI031	SI031				Pomurska			3	24	1511	1510
SI032	SI032				Podravska			3	24	1512	1511
SI033	SI033				Koroška			3	24	1513	1512
SI034	SI034				Savinjska			3	24	1514	1513
SI035	SI035				Zasavska			3	24	1515	1514
SI036	SI036				Posavska			3	24	1516	1515
SI037	SI037				Jugovzhodna Slovenija			3	24	1517	1516
SI038	SI038				Primorsko-notranjska			3	24	1518	1517
SI04	SI04			Zahodna Slovenija				2	24	1519	1518
SI041	SI041				Osrednjeslovenska			3	24	1520	1519
SI042	SI042				Gorenjska			3	24	1521	1520
SI043	SI043				Goriška			3	24	1522	1521
SI044	SI044				Obalno-kraška			3	24	1523	1522
SIZ	SIZ		Extra-Regio NUTS 1					1	24	1524	1523
SIZZ	SIZZ			Extra-Regio NUTS 2				2	24	1525	1524
SIZZZ	SIZZZ				Extra-Regio NUTS 3			3	24	1526	1525
SK	SK	Slovensko				1	renamed	0	25	1527	1526
SK0	SK0		Slovensko					1	25	1528	1527
SK01	SK01			Bratislavský kraj				2	25	1529	1528
SK010	SK010				Bratislavský kraj			3	25	1530	1529
SK02	SK02			Západné Slovensko				2	25	1531	1530
SK021	SK021				Trnavský kraj			3	25	1532	1531
SK022	SK022				Trenčiansky kraj			3	25	1533	1532
SK023	SK023				Nitriansky kraj			3	25	1534	1533
SK03	SK03			Stredné Slovensko				2	25	1535	1534
SK031	SK031				Žilinský kraj			3	25	1536	1535
SK032	SK032				Banskobystrický kraj			3	25	1537	1536
SK04	SK04			Východné Slovensko				2	25	1538	1537
SK041	SK041				Prešovský kraj			3	25	1539	1538
SK042	SK042				Košický kraj			3	25	1540	1539
SKZ	SKZ		Extra-Regio NUTS 1					1	25	1541	1540
SKZZ	SKZZ			Extra-Regio NUTS 2				2	25	1542	1541
SKZZZ	SKZZZ				Extra-Regio NUTS 3			3	25	1543	1542
FI	FI	Suomi/Finland						0	26	1544	1543
FI1	FI1		Manner-Suomi					1	26	1545	1544
FI19	FI19			Länsi-Suomi				2	26	1546	1545
FI193	FI193				Keski-Suomi			3	26	1547	1546
FI194	FI194				Etelä-Pohjanmaa			3	26	1548	1547
FI195	FI195				Pohjanmaa			3	26	1549	1548
FI196	FI196				Satakunta			3	26	1550	1549
FI197	FI197				Pirkanmaa			3	26	1551	1550
FI1B	FI1B			Helsinki-Uusimaa				2	26	1552	1551
FI1B1	FI1B1				Helsinki-Uusimaa			3	26	1553	1552
FI1C	FI1C			Etelä-Suomi				2	26	1554	1553
FI1C1	FI1C1				Varsinais-Suomi			3	26	1555	1554
FI1C2	FI1C2				Kanta-Häme			3	26	1556	1555
FI1C3	FI1C3				Päijät-Häme			3	26	1557	1556
FI1C4	FI1C4				Kymenlaakso			3	26	1558	1557
FI1C5	FI1C5				Etelä-Karjala			3	26	1559	1558
FI1D	FI1D			Pohjois- ja Itä-Suomi				2	26	1560	1559
FI1D1	FI1D1				Etelä-Savo			3	26	1561	1560
FI1D2	FI1D2				Pohjois-Savo			3	26	1562	1561
FI1D3	FI1D3				Pohjois-Karjala			3	26	1563	1562
FI1D5	FI1D5				Keski-Pohjanmaa			3	26	1564	1563
FI1D7	FI1D7				Lappi			3	26	1565	1564
FI1D8	FI1D8				Kainuu			3	26	1566	1565
FI1D9	FI1D9				Pohjois-Pohjanmaa			3	26	1567	1566
FI2	FI2		Åland					1	26	1568	1567
FI20	FI20			Åland				2	26	1569	1568
FI200	FI200				Åland			3	26	1570	1569
FIZ	FIZ		Extra-Regio NUTS 1					1	26	1571	1570
FIZZ	FIZZ			Extra-Regio NUTS 2				2	26	1572	1571
FIZZZ	FIZZZ				Extra-Regio NUTS 3			3	26	1573	1572
SE	SE	Sverige						0	27	1574	1573
SE1	SE1		Östra Sverige					1	27	1575	1574
SE11	SE11			Stockholm				2	27	1576	1575
SE110	SE110				Stockholms län			3	27	1577	1576
SE12	SE12			Östra Mellansverige				2	27	1578	1577
SE121	SE121				Uppsala län			3	27	1579	1578
SE122	SE122				Södermanlands län			3	27	1580	1579
SE123	SE123				Östergötlands län			3	27	1581	1580
SE124	SE124				Örebro län			3	27	1582	1581
SE125	SE125				Västmanlands län			3	27	1583	1582
SE2	SE2		Södra Sverige					1	27	1584	1583
SE21	SE21			Småland med öarna				2	27	1585	1584
SE211	SE211				Jönköpings län			3	27	1586	1585
SE212	SE212				Kronobergs län			3	27	1587	1586
SE213	SE213				Kalmar län			3	27	1588	1587
SE214	SE214				Gotlands län			3	27	1589	1588
SE22	SE22			Sydsverige				2	27	1590	1589
SE221	SE221				Blekinge län			3	27	1591	1590
SE224	SE224				Skåne län			3	27	1592	1591
SE23	SE23			Västsverige				2	27	1593	1592
SE231	SE231				Hallands län			3	27	1594	1593
SE232	SE232				Västra Götalands län			3	27	1595	1594
SE3	SE3		Norra Sverige					1	27	1596	1595
SE31	SE31			Norra Mellansverige				2	27	1597	1596
SE311	SE311				Värmlands län			3	27	1598	1597
SE312	SE312				Dalarnas län			3	27	1599	1598
SE313	SE313				Gävleborgs län			3	27	1600	1599
SE32	SE32			Mellersta Norrland				2	27	1601	1600
SE321	SE321				Västernorrlands län			3	27	1602	1601
SE322	SE322				Jämtlands län			3	27	1603	1602
SE33	SE33			Övre Norrland				2	27	1604	1603
SE331	SE331				Västerbottens län			3	27	1605	1604
SE332	SE332				Norrbottens län			3	27	1606	1605
SEZ	SEZ		Extra-Regio NUTS 1					1	27	1607	1606
SEZZ	SEZZ			Extra-Regio NUTS 2				2	27	1608	1607
SEZZZ	SEZZZ				Extra-Regio NUTS 3			3	27	1609	1608
UK	UK	United Kingdom						0	28	1610	1609
UKC	UKC		North East (England)					1	28	1611	1610
UKC1	UKC1			Tees Valley and Durham				2	28	1612	1611
UKC11	UKC11				Hartlepool and Stockton-on-Tees			3	28	1613	1612
UKC12	UKC12				South Teesside			3	28	1614	1613
UKC13	UKC13				Darlington			3	28	1615	1614
UKC14	UKC14				Durham CC			3	28	1616	1615
UKC2	UKC2			Northumberland and Tyne and Wear				2	28	1617	1616
UKC21	UKC21				Northumberland			3	28	1618	1617
UKC22	UKC22				Tyneside			3	28	1619	1618
UKC23	UKC23				Sunderland			3	28	1620	1619
UKD	UKD		North West (England)					1	28	1621	1620
UKD1	UKD1			Cumbria				2	28	1622	1621
UKD11	UKD11				West Cumbria			3	28	1623	1622
UKD12	UKD12				East Cumbria			3	28	1624	1623
UKD3	UKD3			Greater Manchester				2	28	1625	1624
UKD33	UKD33				Manchester			3	28	1626	1625
UKD34	UKD34				Greater Manchester South West			3	28	1627	1626
UKD35	UKD35				Greater Manchester South East			3	28	1628	1627
UKD36	UKD36				Greater Manchester North West			3	28	1629	1628
UKD37	UKD37				Greater Manchester North East			3	28	1630	1629
UKD4	UKD4			Lancashire				2	28	1631	1630
UKD41	UKD41				Blackburn with Darwen			3	28	1632	1631
UKD42	UKD42				Blackpool			3	28	1633	1632
UKD44	UKD44				Lancaster and Wyre			3	28	1634	1633
UKD45	UKD45				Mid Lancashire			3	28	1635	1634
UKD46	UKD46				East Lancashire			3	28	1636	1635
UKD47	UKD47				Chorley and West Lancashire			3	28	1637	1636
UKD6	UKD6			Cheshire				2	28	1638	1637
UKD61	UKD61				Warrington			3	28	1639	1638
UKD62	UKD62				Cheshire East			3	28	1640	1639
UKD63	UKD63				Cheshire West and Chester			3	28	1641	1640
UKD7	UKD7			Merseyside				2	28	1642	1641
UKD71	UKD71				East Merseyside			3	28	1643	1642
UKD72	UKD72				Liverpool			3	28	1644	1643
UKD73	UKD73				Sefton			3	28	1645	1644
UKD74	UKD74				Wirral			3	28	1646	1645
UKE	UKE		Yorkshire and the Humber					1	28	1647	1646
UKE1	UKE1			East Yorkshire and Northern Lincolnshire				2	28	1648	1647
UKE11	UKE11				Kingston upon Hull, City of			3	28	1649	1648
UKE12	UKE12				East Riding of Yorkshire			3	28	1650	1649
UKE13	UKE13				North and North East Lincolnshire			3	28	1651	1650
UKE2	UKE2			North Yorkshire				2	28	1652	1651
UKE21	UKE21				York			3	28	1653	1652
UKE22	UKE22				North Yorkshire CC			3	28	1654	1653
UKE3	UKE3			South Yorkshire				2	28	1655	1654
UKE31	UKE31				Barnsley, Doncaster and Rotherham			3	28	1656	1655
UKE32	UKE32				Sheffield			3	28	1657	1656
UKE4	UKE4			West Yorkshire				2	28	1658	1657
UKE41	UKE41				Bradford			3	28	1659	1658
UKE42	UKE42				Leeds			3	28	1660	1659
UKE44	UKE44				Calderdale and Kirklees			3	28	1661	1660
UKE45	UKE45				Wakefield			3	28	1662	1661
UKF	UKF		East Midlands (England)					1	28	1663	1662
UKF1	UKF1			Derbyshire and Nottinghamshire				2	28	1664	1663
UKF11	UKF11				Derby			3	28	1665	1664
UKF12	UKF12				East Derbyshire			3	28	1666	1665
UKF13	UKF13				South and West Derbyshire			3	28	1667	1666
UKF14	UKF14				Nottingham			3	28	1668	1667
UKF15	UKF15				North Nottinghamshire			3	28	1669	1668
UKF16	UKF16				South Nottinghamshire			3	28	1670	1669
UKF2	UKF2			Leicestershire, Rutland and Northamptonshire				2	28	1671	1670
UKF21	UKF21				Leicester			3	28	1672	1671
UKF22	UKF22				Leicestershire CC and Rutland			3	28	1673	1672
UKF24	UKF24				West Northamptonshire			3	28	1674	1673
UKF25	UKF25				North Northamptonshire			3	28	1675	1674
UKF3	UKF3			Lincolnshire				2	28	1676	1675
UKF30	UKF30				Lincolnshire			3	28	1677	1676
UKG	UKG		West Midlands (England)					1	28	1678	1677
UKG1	UKG1			Herefordshire, Worcestershire and Warwickshire				2	28	1679	1678
UKG11	UKG11				Herefordshire, County of			3	28	1680	1679
UKG12	UKG12				Worcestershire			3	28	1681	1680
UKG13	UKG13				Warwickshire			3	28	1682	1681
UKG2	UKG2			Shropshire and Staffordshire				2	28	1683	1682
UKG21	UKG21				Telford and Wrekin			3	28	1684	1683
UKG22	UKG22				Shropshire CC			3	28	1685	1684
UKG23	UKG23				Stoke-on-Trent			3	28	1686	1685
UKG24	UKG24				Staffordshire CC			3	28	1687	1686
UKG3	UKG3			West Midlands				2	28	1688	1687
UKG31	UKG31				Birmingham			3	28	1689	1688
UKG32	UKG32				Solihull			3	28	1690	1689
UKG33	UKG33				Coventry			3	28	1691	1690
UKG36	UKG36				Dudley			3	28	1692	1691
UKG37	UKG37				Sandwell			3	28	1693	1692
UKG38	UKG38				Walsall			3	28	1694	1693
UKG39	UKG39				Wolverhampton			3	28	1695	1694
UKH	UKH		East of England					1	28	1696	1695
UKH1	UKH1			East Anglia				2	28	1697	1696
UKH11	UKH11				Peterborough			3	28	1698	1697
UKH12	UKH12				Cambridgeshire CC			3	28	1699	1698
UKH14	UKH14				Suffolk			3	28	1700	1699
UKH15	UKH15				Norwich and East Norfolk			3	28	1701	1700
UKH16	UKH16				North and West Norfolk			3	28	1702	1701
UKH17	UKH17				Breckland and South Norfolk			3	28	1703	1702
UKH2	UKH2			Bedfordshire and Hertfordshire				2	28	1704	1703
UKH21	UKH21				Luton			3	28	1705	1704
UKH23	UKH23				Hertfordshire			3	28	1706	1705
UKH24	UKH24				Bedford			3	28	1707	1706
UKH25	UKH25				Central Bedfordshire			3	28	1708	1707
UKH3	UKH3			Essex				2	28	1709	1708
UKH31	UKH31				Southend-on-Sea			3	28	1710	1709
UKH32	UKH32				Thurrock			3	28	1711	1710
UKH34	UKH34				Essex Haven Gateway			3	28	1712	1711
UKH35	UKH35				West Essex			3	28	1713	1712
UKH36	UKH36				Heart of Essex			3	28	1714	1713
UKH37	UKH37				Essex Thames Gateway			3	28	1715	1714
UKI	UKI		London					1	28	1716	1715
UKI3	UKI3			Inner London — West				2	28	1717	1716
UKI31	UKI31				Camden and City of London			3	28	1718	1717
UKI32	UKI32				Westminster			3	28	1719	1718
UKI33	UKI33				Kensington & Chelsea and Hammersmith & Fulham			3	28	1720	1719
UKI34	UKI34				Wandsworth			3	28	1721	1720
UKI4	UKI4			Inner London — East				2	28	1722	1721
UKI41	UKI41				Hackney and Newham			3	28	1723	1722
UKI42	UKI42				Tower Hamlets			3	28	1724	1723
UKI43	UKI43				Haringey and Islington			3	28	1725	1724
UKI44	UKI44				Lewisham and Southwark			3	28	1726	1725
UKI45	UKI45				Lambeth			3	28	1727	1726
UKI5	UKI5			Outer London — East and North East				2	28	1728	1727
UKI51	UKI51				Bexley and Greenwich			3	28	1729	1728
UKI52	UKI52				Barking & Dagenham and Havering			3	28	1730	1729
UKI53	UKI53				Redbridge and Waltham Forest			3	28	1731	1730
UKI54	UKI54				Enfield			3	28	1732	1731
UKI6	UKI6			Outer London — South				2	28	1733	1732
UKI61	UKI61				Bromley			3	28	1734	1733
UKI62	UKI62				Croydon			3	28	1735	1734
UKI63	UKI63				Merton, Kingston upon Thames and Sutton			3	28	1736	1735
UKI7	UKI7			Outer London — West and North West				2	28	1737	1736
UKI71	UKI71				Barnet			3	28	1738	1737
UKI72	UKI72				Brent			3	28	1739	1738
UKI73	UKI73				Ealing			3	28	1740	1739
UKI74	UKI74				Harrow and Hillingdon			3	28	1741	1740
UKI75	UKI75				Hounslow and Richmond upon Thames			3	28	1742	1741
UKJ	UKJ		South East (England)					1	28	1743	1742
UKJ1	UKJ1			Berkshire, Buckinghamshire and Oxfordshire				2	28	1744	1743
UKJ11	UKJ11				Berkshire			3	28	1745	1744
UKJ12	UKJ12				Milton Keynes			3	28	1746	1745
UKJ13	UKJ13				Buckinghamshire CC			3	28	1747	1746
UKJ14	UKJ14				Oxfordshire			3	28	1748	1747
UKJ2	UKJ2			Surrey, East and West Sussex				2	28	1749	1748
UKJ21	UKJ21				Brighton and Hove			3	28	1750	1749
UKJ22	UKJ22				East Sussex CC			3	28	1751	1750
UKJ25	UKJ25				West Surrey			3	28	1752	1751
UKJ26	UKJ26				East Surrey			3	28	1753	1752
UKJ27	UKJ27				West Sussex (South West)			3	28	1754	1753
UKJ28	UKJ28				West Sussex (North East)			3	28	1755	1754
UKJ3	UKJ3			Hampshire and Isle of Wight				2	28	1756	1755
UKJ31	UKJ31				Portsmouth			3	28	1757	1756
UKJ32	UKJ32				Southampton			3	28	1758	1757
UKJ34	UKJ34				Isle of Wight			3	28	1759	1758
UKJ35	UKJ35				South Hampshire			3	28	1760	1759
UKJ36	UKJ36				Central Hampshire			3	28	1761	1760
UKJ37	UKJ37				North Hampshire			3	28	1762	1761
UKJ4	UKJ4			Kent				2	28	1763	1762
UKJ41	UKJ41				Medway			3	28	1764	1763
UKJ43	UKJ43				Kent Thames Gateway			3	28	1765	1764
UKJ44	UKJ44				East Kent			3	28	1766	1765
UKJ45	UKJ45				Mid Kent			3	28	1767	1766
UKJ46	UKJ46				West Kent			3	28	1768	1767
UKK	UKK		South West (England)					1	28	1769	1768
UKK1	UKK1			Gloucestershire, Wiltshire and Bristol/Bath area				2	28	1770	1769
UKK11	UKK11				Bristol, City of			3	28	1771	1770
UKK12	UKK12				Bath and North East Somerset, North Somerset and South Gloucestershire			3	28	1772	1771
UKK13	UKK13				Gloucestershire			3	28	1773	1772
UKK14	UKK14				Swindon			3	28	1774	1773
UKK15	UKK15				Wiltshire CC			3	28	1775	1774
UKK2	UKK2			Dorset and Somerset				2	28	1776	1775
UKK23	UKK23				Somerset			3	28	1779	1776
UKK21	UKK24				Bournemouth, Christchurch and Poole	4	boundary change, recode, rename	3	28	1777	1777
UKK22	UKK25				Dorset	4	boundary change, recode, rename	3	28	1778	1778
UKK3	UKK3			Cornwall and Isles of Scilly				2	28	1780	1779
UKK30	UKK30				Cornwall and Isles of Scilly			3	28	1781	1780
UKK4	UKK4			Devon				2	28	1782	1781
UKK41	UKK41				Plymouth			3	28	1783	1782
UKK42	UKK42				Torbay			3	28	1784	1783
UKK43	UKK43				Devon CC			3	28	1785	1784
UKL	UKL		Wales					1	28	1786	1785
UKL1	UKL1			West Wales and The Valleys				2	28	1787	1786
UKL11	UKL11				Isle of Anglesey			3	28	1788	1787
UKL12	UKL12				Gwynedd			3	28	1789	1788
UKL13	UKL13				Conwy and Denbighshire			3	28	1790	1789
UKL14	UKL14				South West Wales			3	28	1791	1790
UKL15	UKL15				Central Valleys			3	28	1792	1791
UKL16	UKL16				Gwent Valleys			3	28	1793	1792
UKL17	UKL17				Bridgend and Neath Port Talbot			3	28	1794	1793
UKL18	UKL18				Swansea			3	28	1795	1794
UKL2	UKL2			East Wales				2	28	1796	1795
UKL21	UKL21				Monmouthshire and Newport			3	28	1797	1796
UKL22	UKL22				Cardiff and Vale of Glamorgan			3	28	1798	1797
UKL23	UKL23				Flintshire and Wrexham			3	28	1799	1798
UKL24	UKL24				Powys			3	28	1800	1799
UKM	UKM		Scotland					1	28	1801	1800
UKM5	UKM5			North Eastern Scotland				2	28	1802	1801
UKM50	UKM50				Aberdeen City and Aberdeenshire			3	28	1803	1802
UKM6	UKM6			Highlands and Islands				2	28	1804	1803
UKM61	UKM61				Caithness & Sutherland and Ross & Cromarty			3	28	1805	1804
UKM62	UKM62				Inverness & Nairn and Moray, Badenoch & Strathspey			3	28	1806	1805
UKM63	UKM63				Lochaber, Skye & Lochalsh, Arran & Cumbrae and Argyll & Bute			3	28	1807	1806
UKM64	UKM64				Na h-Eileanan Siar (Western Isles)			3	28	1808	1807
UKM65	UKM65				Orkney Islands			3	28	1809	1808
UKM66	UKM66				Shetland Islands			3	28	1810	1809
UKM7	UKM7			Eastern Scotland				2	28	1811	1810
UKM71	UKM71				Angus and Dundee City			3	28	1812	1811
UKM72	UKM72				Clackmannanshire and Fife			3	28	1813	1812
UKM73	UKM73				East Lothian and Midlothian			3	28	1814	1813
UKM75	UKM75				Edinburgh, City of			3	28	1815	1814
UKM76	UKM76				Falkirk			3	28	1816	1815
UKM77	UKM77				Perth & Kinross and Stirling			3	28	1817	1816
UKM78	UKM78				West Lothian			3	28	1818	1817
UKM8	UKM8			West Central Scotland				2	28	1819	1818
UKM81	UKM81				East Dunbartonshire, West Dunbartonshire and Helensburgh & Lomond			3	28	1820	1819
UKM82	UKM82				Glasgow City			3	28	1821	1820
UKM83	UKM83				Inverclyde, East Renfrewshire and Renfrewshire			3	28	1822	1821
UKM84	UKM84				North Lanarkshire			3	28	1823	1822
UKM9	UKM9			Southern Scotland				2	28	1824	1823
UKM91	UKM91				Scottish Borders			3	28	1825	1824
UKM92	UKM92				Dumfries & Galloway			3	28	1826	1825
UKM93	UKM93				East Ayrshire and North Ayrshire mainland			3	28	1827	1826
UKM94	UKM94				South Ayrshire			3	28	1828	1827
UKM95	UKM95				South Lanarkshire			3	28	1829	1828
UKN	UKN		Northern Ireland					1	28	1830	1829
UKN0	UKN0			Northern Ireland				2	28	1831	1830
UKN06	UKN06				Belfast			3	28	1832	1831
UKN07	UKN07				Armagh City, Banbridge and Craigavon			3	28	1833	1832
UKN08	UKN08				Newry, Mourne and Down			3	28	1834	1833
UKN09	UKN09				Ards and North Down			3	28	1835	1834
UKN10	UKN0A				Derry City and Strabane	2	recode	3	28	1836	1835
UKN11	UKN0B				Mid Ulster	2	recode	3	28	1837	1836
UKN12	UKN0C				Causeway Coast and Glens	2	recode	3	28	1838	1837
UKN13	UKN0D				Antrim and Newtownabbey	2	recode	3	28	1839	1838
UKN14	UKN0E				Lisburn and Castlereagh	2	recode	3	28	1840	1839
UKN15	UKN0F				Mid and East Antrim	2	recode	3	28	1841	1840
UKN16	UKN0G				Fermanagh and Omagh	2	recode	3	28	1842	1841
UKZ	UKZ		Extra-Regio NUTS 1					1	28	1843	1842
UKZZ	UKZZ			Extra-Regio NUTS 2				2	28	1844	1843
UKZZZ	UKZZZ				Extra-Regio NUTS 3			3	28	1845	1844
Statistical regions (EFTA countries, candidate countries, potential candidates, other partners (Eastern Partnership etc.):
IS	IS	Ísland						0	29	1845	1845
IS0	IS0		Ísland					1	29	1846	1846
IS00	IS00			Ísland				2	29	1847	1847
IS001	IS001				Höfuðborgarsvæði			3	29	1848	1848
IS002	IS002				Landsbyggð			3	29	1849	1849
ISZ	ISZ		Extra-Regio NUTS 1					1	29	1850	1850
ISZZ	ISZZ			Extra-Regio NUTS 2				2	29	1851	1851
ISZZZ	ISZZZ				Extra-Regio NUTS 3			3	29	1852	1852
LI	LI	Liechtenstein						0	30	1853	1853
LI0	LI0		Liechtenstein					1	30	1854	1854
LI00	LI00			Liechtenstein				2	30	1855	1855
LI000	LI000				Liechtenstein			3	30	1856	1856
LIZ	LIZ		Extra-Regio NUTS 1					1	30	1857	1857
LIZZ	LIZZ			Extra-Regio NUTS 2				2	30	1858	1858
LIZZZ	LIZZZ				Extra-Regio NUTS 3			3	30	1859	1859
NO	NO	Norge						0	31	1860	1860
NO0	NO0		Norge					1	31	1861	1861
NO01				Oslo og Akershus		5	discontinued	2	31	1862
NO02	NO02			Innlandet		1	renamed (previously "Hedmark og Oppland")	2	31	1865	1862
NO021					Hedmark	5	discontinued; now part of NO020	3	31	1866
NO022					Oppland	5	discontinued; now part of NO020	3	31	1867
	NO020				Innlandet	6	new; merge of ex-NO021 and NO022	3	31		1863
NO06	NO06			Trøndelag				2	31	1881	1864
	NO060				Trøndelag	6	new; merge of ex-NO061 and NO062	3	31		1865
NO061					Sør-Trøndelag	5	discontinued (01/01/2018); now part of NO060	3	31	1882
NO062					Nord-Trøndelag	5	discontinued (01/01/2018); now part of NO060	3	31	1883
NO07	NO07			Nord-Norge				2	31	1884	1866
NO071	NO071				Nordland			3	31	1885	1867
	NO074				Troms og Finnmark	6	new; merge of ex-NO072 and NO073	3	31		1868
NO072					Troms	5	discontinued; now part of NO074	3	31	1886
NO073					Finnmark	5	discontinued; now part of NO074	3	31	1887
	NO08			Oslo og Viken		6	new	2	31		1869
NO011	NO081				Oslo	2	recoded	3	31	1863	1870
NO012					Akershus	5	discontinued, now part of NO082	3	31	1864
	NO082				Viken	6	new; made from ex-NO012, NO031 and NO032	3	31		1871
	NO09			Agder og Sør-Østlandet		6	new	2	31		1872
	NO091				Vestfold og Telemark	6	new; merge of ex-NO033 and NO034	3	31		1873
	NO092				Agder	6	new; merge of ex-NO041 and NO042	3	31		1874
NO05	NO0A			Vestlandet		3	recoded (boundary change)	2	31	1877	1875
NO043	NO0A1				Rogaland	2	recoded	3	31	1876	1876
	NO0A2				Vestland	6	new; merge of ex-NO051 and NO052	3	31		1877
NO053	NO0A3				Møre og Romsdal	2	recoded	3	31	1880	1878
NO051					Hordaland	5	discontinued; now part of NO0A2	3	31	1878
NO052					Sogn og Fjordane	5	discontinued; now part of NO0A2	3	31	1879
NO03				Sør-Østlandet		5	discontinued	2	31	1868
NO031					Østfold	5	discontinued; now part of NO082	3	31	1869
NO032					Buskerud	5	discontinued; now part of NO082	3	31	1870
NO033					Vestfold	5	discontinued; now part of NO091	3	31	1871
NO034					Telemark	5	discontinued; now part of NO091	3	31	1872
NO04				Agder og Rogaland		5	discontinued	2	31	1873
NO041					Aust-Agder	5	discontinued; now part of NO092	3	31	1874
NO042					Vest-Agder	5	discontinued; now part of NO092	3	31	1875
	NO0B			Jan Mayen and Svalbard		6	new	2	31		1879
	NO0B1				Jan Mayen	6	new	3	31		1880
	NO0B2				Svalbard	6	new	3	31		1881
NOZ	NOZ		Extra-Regio NUTS 1					1	31	1888	1882
NOZZ	NOZZ			Extra-Regio NUTS 2				2	31	1889	1883
NOZZZ	NOZZZ				Extra-Regio NUTS 3			3	31	1890	1884
CH	CH	Schweiz/Suisse/Svizzera						0	32	1891	1885
CH0	CH0		Schweiz/Suisse/Svizzera					1	32	1892	1886
CH01	CH01			Région lémanique				2	32	1893	1887
CH011	CH011				Vaud			3	32	1894	1888
CH012	CH012				Valais / Wallis			3	32	1895	1889
CH013	CH013				Genève			3	32	1896	1890
CH02	CH02			Espace Mittelland				2	32	1897	1891
CH021	CH021				Bern / Berne			3	32	1898	1892
CH022	CH022				Fribourg / Freiburg			3	32	1899	1893
CH023	CH023				Solothurn			3	32	1900	1894
CH024	CH024				Neuchâtel			3	32	1901	1895
CH025	CH025				Jura			3	32	1902	1896
CH03	CH03			Nordwestschweiz				2	32	1903	1897
CH031	CH031				Basel-Stadt			3	32	1904	1898
CH032	CH032				Basel-Landschaft			3	32	1905	1899
CH033	CH033				Aargau			3	32	1906	1900
CH04	CH04			Zürich				2	32	1907	1901
CH040	CH040				Zürich			3	32	1908	1902
CH05	CH05			Ostschweiz				2	32	1909	1903
CH051	CH051				Glarus			3	32	1910	1904
CH052	CH052				Schaffhausen			3	32	1911	1905
CH053	CH053				Appenzell Ausserrhoden			3	32	1912	1906
CH054	CH054				Appenzell Innerrhoden			3	32	1913	1907
CH055	CH055				St. Gallen			3	32	1914	1908
CH056	CH056				Graubünden / Grigioni / Grischun			3	32	1915	1909
CH057	CH057				Thurgau			3	32	1916	1910
CH06	CH06			Zentralschweiz				2	32	1917	1911
CH061	CH061				Luzern			3	32	1918	1912
CH062	CH062				Uri			3	32	1919	1913
CH063	CH063				Schwyz			3	32	1920	1914
CH064	CH064				Obwalden			3	32	1921	1915
CH065	CH065				Nidwalden			3	32	1922	1916
CH066	CH066				Zug			3	32	1923	1917
CH07	CH07			Ticino				2	32	1924	1918
CH070	CH070				Ticino			3	32	1925	1919
CHZ	CHZ		Extra-Regio NUTS 1					1	32	1926	1920
CHZZ	CHZZ			Extra-Regio NUTS 2				2	32	1927	1921
CHZZZ	CHZZZ				Extra-Regio NUTS 3			3	32	1928	1922
ME	ME	Црна Гора (Crna Gora)						0	33	1929	1923
ME0	ME0		Црна Гора (Crna Gora)					1	33	1930	1924
ME00	ME00			Црна Гора (Crna Gora)				2	33	1931	1925
ME000	ME000				Црна Гора (Crna Gora)			3	33	1932	1926
MEZ	MEZ		Extra-Regio NUTS 1					1	33	1933	1927
MEZZ	MEZZ			Extra-Regio NUTS 2				2	33	1934	1928
MEZZZ	MEZZZ				Extra-Regio NUTS 3			3	33	1935	1929
MK	MK	Северна Македонија						0	34	1936	1930
MK0	MK0		Северна Македонија					1	34	1937	1931
MK00	MK00			Северна Македонија				2	34	1938	1932
MK001	MK001				Вардарски (Vardarski)			3	34	1939	1933
MK002	MK002				Источен (Istočen)			3	34	1940	1934
MK003	MK003				Југозападен (Jugozapaden)			3	34	1941	1935
MK004	MK004				Југоисточен (Jugoistočen)			3	34	1942	1936
MK005	MK005				Пелагониски (Pelagoniski)			3	34	1943	1937
MK006	MK006				Полошки (Pološki)			3	34	1944	1938
MK007	MK007				Североисточен (Severoistočen)			3	34	1945	1939
MK008	MK008				Скопски (Skopski)			3	34	1946	1940
MKZ	MKZ		Extra-Regio NUTS 1					1	34	1947	1941
MKZZ	MKZZ			Extra-Regio NUTS 2				2	34	1948	1942
MKZZZ	MKZZZ				Extra-Regio NUTS 3			3	34	1949	1943
AL	AL	Shqipëria						0	35	1950	1944
AL0	AL0		Shqipëria					1	35	1951	1945
AL01	AL01			Veri				2	35	1952	1946
AL011	AL011				Dibër			3	35	1953	1947
AL012	AL012				Durrës			3	35	1954	1948
AL013	AL013				Kukës			3	35	1955	1949
AL014	AL014				Lezhë			3	35	1956	1950
AL015	AL015				Shkodër			3	35	1957	1951
AL02	AL02			Qender				2	35	1958	1952
AL021	AL021				Elbasan			3	35	1959	1953
AL022	AL022				Tiranë			3	35	1960	1954
AL03	AL03			Jug				2	35	1961	1955
AL031	AL031				Berat			3	35	1962	1956
AL032	AL032				Fier			3	35	1963	1957
AL033	AL033				Gjirokastër			3	35	1964	1958
AL034	AL034				Korcë			3	35	1965	1959
AL035	AL035				Vlorë			3	35	1966	1960
ALZ	ALZ		Extra-Regio NUTS 1					1	35	1967	1961
ALZZ	ALZZ			Extra-Regio NUTS 2				2	35	1968	1962
ALZZZ	ALZZZ				Extra-Regio NUTS 3			3	35	1969	1963
RS	RS	Srbija/Сpбија						0	36	1970	1964
RS1	RS1		Србија - север					1	36	1971	1965
RS11	RS11			Београдски регион				2	36	1972	1966
RS110	RS110				Београдска област			3	36	1973	1967
RS12	RS12			Регион Војводине				2	36	1974	1968
RS121	RS121				Западнобачка област			3	36	1975	1969
RS122	RS122				Јужнобанатска област			3	36	1976	1970
RS123	RS123				Јужнобачка област			3	36	1977	1971
RS124	RS124				Севернобанатска област			3	36	1978	1972
RS125	RS125				Севернобачка област			3	36	1979	1973
[truncated: 148 more rows]

## Sheet: Changes NUTS-1
Code 2016	Code 2021	Label	Change	Explanation (new = old)
BE3	BE3	Région wallonne	renamed
CZ0	CZ0	Česko	renamed
FRE	FRE	Hauts-de-France	name change
FRF	FRF	Grand Est	name change
FRI	FRI	Nouvelle-Aquitaine	name change
FRJ	FRJ	Occitanie	name change

## Sheet: Changes NUTS-2
Code 2016	Code 2021	Label	Change	Explanation (new = old)
ES52	ES52	Comunitat Valenciana	name change
ES63	ES63	Ciudad de Ceuta	name change
ES64	ES64	Ciudad de Melilla	name change
HR04		Kontinentalna Hrvatska	discontinued; split into new HR02, HR05 and HR06
	HR05	Grad Zagreb	new	HR05 = HR041
	HR06	Sjeverna Hrvatska	new	HR06 = HR046 + HR044 + HR045 + HR043 + HR042
	HR02	Panonska Hrvatska	new	HR02 = HR047 + HR048 + HR049 + HR04A + HR04B + HR04C + HR04D + HR04E
NO01		Oslo og Akershus	discontinued
	NO08	Oslo og Viken	new
NO02	NO02	Innlandet	renamed
	NO09	Agder og Sør-Østlandet	new
NO05	NO0A	Vestlandet	recoded (boundary change)
NO03		Sør-Østlandet	discontinued
NO04		Agder og Rogaland	discontinued
	NO0B	Jan Mayen and Svalbard	new
							`

## Sheet: Changes NUTS-3
Code 2016	Code 2021	Label	Change	Explanation (new = old)
BE100	BE100	Arr. de Bruxelles-Capitale/Arr. Brussel-Hoofdstad	renamed
BE221	BE224	Arr. Hasselt	boundary change, recode
BE222	BE225	Arr. Maaseik	boundary change, recode
BE324		Arr. Mouscron	discontinued; merged with ex-BE327
BE327		Arr. Tournai	discontinued; merged with ex-BE324
	BE328	Arr. Tournai-Mouscron	new; merge of ex-BE327 and BE324	BE328 = ex-BE327 + ex-BE324
	BE329	Arr. La Louvière	new; made from parts of ex-BE321, BE322, BE325, BE326
BE321	BE32A	Arr. Ath	boundary change, recode
BE322	BE32B	Arr. Charleroi	boundary change, recode
BE325	BE32C	Arr. Soignies	boundary change, recode
BE326	BE32D	Arr. Thuin	boundary change, recode
EE006	EE009	Kesk-Eesti	recode, boundary change
EE007	EE00A	Kirde-Eesti	recode, boundary change
EL421	EL421	Κάλυμνος, Κάρπαθος – Ηρωική Νήσος Κάσος, Κως, Ρόδος	name change
HR041	HR050	Grad Zagreb	recoded (reassignment)	HR050 = HR041
HR046	HR061	Međimurska županija	recoded (reassignment)	HR061 = HR046
HR044	HR062	Varaždinska županija	recoded (reassignment)	HR062 = HR044
HR045	HR063	Koprivničko-križevačka županija	recoded (reassignment)	HR063 = HR045
HR043	HR064	Krapinsko-zagorska županija	recoded (reassignment)	HR064 = HR043
HR042	HR065	Zagrebačka županija	recoded (reassignment)	HR065 = HR042
HR047	HR021	Bjelovarsko-bilogorska županija	recoded (reassignment)	HR021 = HR047
HR048	HR022	Virovitičko-podravska županija	recoded (reassignment)	HR022 = HR048
HR049	HR023	Požeško-slavonska županija	recoded (reassignment)	HR023 = HR049
HR04A	HR024	Brodsko-posavska županija	recoded (reassignment)	HR024 = HR04A
HR04B	HR025	Osječko-baranjska županija	recoded (reassignment)	HR025 = HR04B
HR04C	HR026	Vukovarsko-srijemska županija	recoded (reassignment)	HR026 = HR04C
HR04D	HR027	Karlovačka županija	recoded (reassignment)	HR027 = HR04D
HR04E	HR028	Sisačko-moslavačka županija	recoded (reassignment)	HR028 = HR04E
ITG25	ITG2D	Sassari	recode, boundary change: merge of ex-ITG25 and ex-ITG29	ITG2D = ex-ITG25 + ex-ITG29
ITG26	ITG2E	Nuoro	recode, boundary change: merge of ex-ITG26 plus most parts of ex-ITG2A
ITG27	ITG2F	Cagliari	recode, boundary change: made of smaller part of ex-ITG27
ITG28	ITG2G	Oristano	recode, boundary change: lost small part to new ITG2H
	ITG2H	Sud Sardegna	new region, made of most parts of ex-ITG27, small part of ex-ITG28, small part of ex-ITG2A, ex-ITG2B and ex-ITG2C
ITG29		Olbia-Tempio	discontinued
ITG2A		Ogliastra	discontinued
ITG2B		Medio Campidano	discontinued
ITG2C		Carbonia-Iglesias	discontinued
UKK21	UKK24	Bournemouth, Christchurch and Poole	boundary change, recode, rename
UKK22	UKK25	Dorset	boundary change, recode, rename
UKN10	UKN0A	Derry City and Strabane	recode	UKN0A = UKN10
UKN11	UKN0B	Mid Ulster	recode	UKN0B = UKN11
UKN12	UKN0C	Causeway Coast and Glens	recode	UKN0C = UKN12
UKN13	UKN0D	Antrim and Newtownabbey	recode	UKN0D = UKN13
UKN14	UKN0E	Lisburn and Castlereagh	recode	UKN0E = UKN14
UKN15	UKN0F	Mid and East Antrim	recode	UKN0F = UKN15
UKN16	UKN0G	Fermanagh and Omagh	recode	UKN0G = UKN16
NO011	NO081	Oslo	recoded	NO081 = NO011
NO012		Akershus	discontinued, now part of NO082
	NO082	Viken	new; made from ex-NO012, NO031 and NO032	NO082 = NO012+NO031+NO032
NO021		Hedmark	discontinued; now part of NO020
NO022		Oppland	discontinued; now part of NO020
	NO020	Innlandet	new; merge of ex-NO021 and NO022	NO020 = NO021+NO022
	NO091	Vestfold og Telemark	new; merge of ex-NO033 and NO034	NO091 = NO033+NO034
	NO092	Agder	new; merge of ex-NO041 and NO042	NO092 = NO041+NO042
NO043	NO0A1	Rogaland	recoded	NO0A1 = NO043
	NO0A2	Vestland	new; merge of ex-NO051 and NO052	NO0A2 = NO051+NO052
NO053	NO0A3	Møre og Romsdal	recoded	NO0A3 = NO053
NO051		Hordaland	discontinued; now part of NO0A2
NO052		Sogn og Fjordane	discontinued; now part of NO0A2
NO031		Østfold	discontinued; now part of NO082
NO032		Buskerud	discontinued; now part of NO082
NO033		Vestfold	discontinued; now part of NO091
NO034		Telemark	discontinued; now part of NO091
NO041		Aust-Agder	discontinued; now part of NO092
NO042		Vest-Agder	discontinued; now part of NO092
NO061		Sør-Trøndelag	discontinued; now part of NO060	01/01/2018
NO062		Nord-Trøndelag	discontinued; now part of NO060	01/01/2018
	NO060	Trøndelag	new; merge of ex-NO061 and NO062	01/01/2018; NO060 = NO061+NO062
NO072		Troms	discontinued; now part of NO074
NO073		Finnmark	discontinued; now part of NO074
	NO074	Troms og Finnmark	new; merge of ex-NO072 and NO073	NO074 = NO072+NO073
	NO0B1	Jan Mayen	new
	NO0B2	Svalbard	new

## Sheet: Urban-rural
NUTS_ID	URBAN-RURAL CATEGORY	URBAN-RURAL LABEL			URBAN-RURAL REGIONS
AL011	3	predominantly rural
AL012	2	intermediate			CATEGORY CODE	CATEGORY LABEL
AL013	3	predominantly rural			1	perdominantly urban
AL014	3	predominantly rural			2	intermediate
AL015	2	intermediate			3	predominantly rural
AL021	3	predominantly rural
AL022	1	perdominantly urban
AL031	3	predominantly rural
AL032	3	predominantly rural
AL033	3	predominantly rural
AL034	3	predominantly rural
AL035	2	intermediate
AT111	3	predominantly rural
AT112	3	predominantly rural
AT113	3	predominantly rural
AT121	3	predominantly rural
AT122	2	intermediate
AT123	3	predominantly rural
AT124	3	predominantly rural
AT125	3	predominantly rural
AT126	1	perdominantly urban
AT127	2	intermediate
AT130	1	perdominantly urban
AT211	2	intermediate
AT212	3	predominantly rural
AT213	3	predominantly rural
AT221	2	intermediate
AT222	3	predominantly rural
AT223	2	intermediate
AT224	3	predominantly rural
AT225	3	predominantly rural
AT226	3	predominantly rural
AT311	3	predominantly rural
AT312	2	intermediate
AT313	3	predominantly rural
AT314	3	predominantly rural
AT315	3	predominantly rural
AT321	3	predominantly rural
AT322	3	predominantly rural
AT323	2	intermediate
AT331	3	predominantly rural
AT332	1	perdominantly urban
AT333	3	predominantly rural
AT334	3	predominantly rural
AT335	3	predominantly rural
AT341	3	predominantly rural
AT342	1	perdominantly urban
BE100	1	perdominantly urban
BE211	1	perdominantly urban
BE212	1	perdominantly urban
BE213	2	intermediate
BE223	2	intermediate
BE224	1	perdominantly urban
BE225	2	intermediate
BE231	1	perdominantly urban
BE232	1	perdominantly urban
BE233	2	intermediate
BE234	2	intermediate
BE235	2	intermediate
BE236	1	perdominantly urban
BE241	1	perdominantly urban
BE242	2	intermediate
BE251	2	intermediate
BE252	2	intermediate
BE253	2	intermediate
BE254	1	perdominantly urban
BE255	2	intermediate
BE256	2	intermediate
BE257	2	intermediate
BE258	2	intermediate
BE310	2	intermediate
BE323	1	perdominantly urban
BE328	2	intermediate
BE329	1	perdominantly urban
BE32A	3	predominantly rural
BE32B	1	perdominantly urban
BE32C	2	intermediate
BE32D	3	predominantly rural
BE331	3	predominantly rural
BE332	1	perdominantly urban
BE334	3	predominantly rural
BE335	2	intermediate
BE336	3	predominantly rural
BE341	3	predominantly rural
BE342	3	predominantly rural
BE343	3	predominantly rural
BE344	3	predominantly rural
BE345	3	predominantly rural
BE351	3	predominantly rural
BE352	2	intermediate
BE353	3	predominantly rural
BG311	3	predominantly rural
BG312	2	intermediate
BG313	2	intermediate
BG314	2	intermediate
BG315	2	intermediate
BG321	2	intermediate
BG322	2	intermediate
BG323	2	intermediate
BG324	3	predominantly rural
BG325	3	predominantly rural
BG331	2	intermediate
BG332	2	intermediate
BG333	2	intermediate
BG334	3	predominantly rural
BG341	2	intermediate
BG342	2	intermediate
BG343	2	intermediate
BG344	2	intermediate
BG411	1	perdominantly urban
BG412	3	predominantly rural
BG413	2	intermediate
BG414	2	intermediate
BG415	2	intermediate
BG421	2	intermediate
BG422	2	intermediate
BG423	2	intermediate
BG424	3	predominantly rural
BG425	3	predominantly rural
CH011	2	intermediate
CH012	2	intermediate
CH013	1	perdominantly urban
CH021	2	intermediate
CH022	2	intermediate
CH023	1	perdominantly urban
CH024	2	intermediate
CH025	3	predominantly rural
CH031	1	perdominantly urban
CH032	1	perdominantly urban
CH033	1	perdominantly urban
CH040	1	perdominantly urban
CH051	2	intermediate
CH052	2	intermediate
CH053	2	intermediate
CH054	2	intermediate
CH055	2	intermediate
CH056	3	predominantly rural
CH057	2	intermediate
CH061	2	intermediate
CH062	2	intermediate
CH063	2	intermediate
CH064	2	intermediate
CH065	2	intermediate
CH066	1	perdominantly urban
CH070	1	perdominantly urban
CY000	2	intermediate
CZ010	1	perdominantly urban
CZ020	1	perdominantly urban
CZ031	3	predominantly rural
CZ032	3	predominantly rural
CZ041	2	intermediate
CZ042	2	intermediate
CZ051	2	intermediate
CZ052	2	intermediate
CZ053	3	predominantly rural
CZ063	3	predominantly rural
CZ064	2	intermediate
CZ071	2	intermediate
CZ072	2	intermediate
CZ080	2	intermediate
DE111	1	perdominantly urban
DE112	1	perdominantly urban
DE113	1	perdominantly urban
DE114	1	perdominantly urban
DE115	1	perdominantly urban
DE116	1	perdominantly urban
DE117	2	intermediate
DE118	2	intermediate
DE119	3	predominantly rural
DE11A	3	predominantly rural
DE11B	3	predominantly rural
DE11C	2	intermediate
DE11D	2	intermediate
DE121	1	perdominantly urban
DE122	1	perdominantly urban
DE123	1	perdominantly urban
DE124	1	perdominantly urban
DE125	1	perdominantly urban
DE126	1	perdominantly urban
DE127	3	predominantly rural
DE128	1	perdominantly urban
DE129	2	intermediate
DE12A	3	predominantly rural
DE12B	2	intermediate
DE12C	3	predominantly rural
DE131	2	intermediate
DE132	2	intermediate
DE133	2	intermediate
DE134	2	intermediate
DE135	3	predominantly rural
DE136	2	intermediate
DE137	2	intermediate
DE138	2	intermediate
DE139	2	intermediate
DE13A	2	intermediate
DE141	2	intermediate
DE142	2	intermediate
DE143	2	intermediate
DE144	2	intermediate
DE145	2	intermediate
DE146	3	predominantly rural
DE147	2	intermediate
DE148	2	intermediate
DE149	3	predominantly rural
DE211	2	intermediate
DE212	1	perdominantly urban
DE213	2	intermediate
DE214	2	intermediate
DE215	2	intermediate
DE216	2	intermediate
DE217	2	intermediate
DE218	2	intermediate
DE219	2	intermediate
DE21A	3	predominantly rural
DE21B	2	intermediate
DE21C	2	intermediate
DE21D	2	intermediate
DE21E	3	predominantly rural
DE21F	2	intermediate
DE21G	3	predominantly rural
DE21H	1	perdominantly urban
DE21I	3	predominantly rural
DE21J	2	intermediate
DE21K	2	intermediate
DE21L	2	intermediate
DE21M	3	predominantly rural
DE21N	2	intermediate
DE221	3	predominantly rural
DE222	3	predominantly rural
DE223	3	predominantly rural
DE224	3	predominantly rural
DE225	3	predominantly rural
DE226	3	predominantly rural
DE227	3	predominantly rural
DE228	3	predominantly rural
DE229	3	predominantly rural
DE22A	3	predominantly rural
DE22B	3	predominantly rural
DE22C	3	predominantly rural
DE231	2	intermediate
DE232	2	intermediate
DE233	3	predominantly rural
DE234	2	intermediate
DE235	3	predominantly rural
DE236	3	predominantly rural
DE237	3	predominantly rural
DE238	2	intermediate
DE239	3	predominantly rural
DE23A	3	predominantly rural
DE241	2	intermediate
DE242	2	intermediate
DE243	2	intermediate
DE244	2	intermediate
DE245	2	intermediate
DE246	2	intermediate
DE247	2	intermediate
DE248	2	intermediate
DE249	2	intermediate
DE24A	3	predominantly rural
DE24B	3	predominantly rural
DE24C	3	predominantly rural
DE24D	3	predominantly rural
DE251	3	predominantly rural
DE252	1	perdominantly urban
DE253	1	perdominantly urban
DE254	1	perdominantly urban
DE255	1	perdominantly urban
DE256	3	predominantly rural
DE257	1	perdominantly urban
DE258	1	perdominantly urban
DE259	2	intermediate
DE25A	3	predominantly rural
DE25B	2	intermediate
DE25C	3	predominantly rural
DE261	1	perdominantly urban
DE262	2	intermediate
DE263	2	intermediate
DE264	1	perdominantly urban
DE265	3	predominantly rural
DE266	3	predominantly rural
DE267	3	predominantly rural
DE268	3	predominantly rural
DE269	2	intermediate
DE26A	3	predominantly rural
DE26B	2	intermediate
DE26C	2	intermediate
DE271	1	perdominantly urban
DE272	2	intermediate
DE273	2	intermediate
DE274	3	predominantly rural
DE275	2	intermediate
DE276	1	perdominantly urban
DE277	3	predominantly rural
DE278	3	predominantly rural
DE279	2	intermediate
DE27A	2	intermediate
DE27B	2	intermediate
DE27C	3	predominantly rural
DE27D	3	predominantly rural
DE27E	2	intermediate
DE300	1	perdominantly urban
DE401	2	intermediate
DE402	2	intermediate
DE403	2	intermediate
DE404	2	intermediate
DE405	2	intermediate
DE406	2	intermediate
DE407	3	predominantly rural
DE408	2	intermediate
DE409	2	intermediate
DE40A	2	intermediate
DE40B	2	intermediate
DE40C	2	intermediate
DE40D	3	predominantly rural
DE40E	2	intermediate
DE40F	3	predominantly rural
DE40G	2	intermediate
DE40H	2	intermediate
DE40I	3	predominantly rural
DE501	1	perdominantly urban
DE502	2	intermediate
DE600	1	perdominantly urban
DE711	1	perdominantly urban
DE712	1	perdominantly urban
DE713	1	perdominantly urban
DE714	1	perdominantly urban
DE715	1	perdominantly urban
DE716	1	perdominantly urban
DE717	1	perdominantly urban
DE718	1	perdominantly urban
DE719	2	intermediate
DE71A	1	perdominantly urban
DE71B	3	predominantly rural
DE71C	1	perdominantly urban
DE71D	2	intermediate
DE71E	2	intermediate
DE721	2	intermediate
DE722	2	intermediate
DE723	2	intermediate
DE724	2	intermediate
DE725	3	predominantly rural
DE731	2	intermediate
DE732	2	intermediate
DE733	3	predominantly rural
DE734	2	intermediate
DE735	3	predominantly rural
DE736	3	predominantly rural
DE737	3	predominantly rural
DE803	2	intermediate
DE804	3	predominantly rural
DE80J	3	predominantly rural
DE80K	2	intermediate
DE80L	3	predominantly rural
DE80M	3	predominantly rural
DE80N	3	predominantly rural
DE80O	3	predominantly rural
DE911	2	intermediate
DE912	2	intermediate
DE913	2	intermediate
DE914	2	intermediate
DE916	2	intermediate
DE917	3	predominantly rural
DE918	3	predominantly rural
DE91A	2	intermediate
DE91B	2	intermediate
DE91C	2	intermediate
DE922	2	intermediate
DE923	2	intermediate
DE925	2	intermediate
DE926	3	predominantly rural
DE927	3	predominantly rural
DE928	2	intermediate
DE929	1	perdominantly urban
DE931	2	intermediate
DE932	2	intermediate
DE933	2	intermediate
DE934	3	predominantly rural
DE935	2	intermediate
DE936	2	intermediate
DE937	3	predominantly rural
DE938	2	intermediate
DE939	2	intermediate
DE93A	3	predominantly rural
DE93B	2	intermediate
DE941	1	perdominantly urban
DE942	2	intermediate
DE943	2	intermediate
DE944	2	intermediate
DE945	2	intermediate
DE946	2	intermediate
DE947	2	intermediate
DE948	3	predominantly rural
DE949	3	predominantly rural
DE94A	2	intermediate
DE94B	2	intermediate
DE94C	2	intermediate
DE94D	2	intermediate
DE94E	2	intermediate
DE94F	2	intermediate
DE94G	2	intermediate
DE94H	3	predominantly rural
DEA11	1	perdominantly urban
DEA12	1	perdominantly urban
DEA13	1	perdominantly urban
DEA14	1	perdominantly urban
DEA15	1	perdominantly urban
DEA16	1	perdominantly urban
DEA17	1	perdominantly urban
DEA18	1	perdominantly urban
DEA19	1	perdominantly urban
DEA1A	1	perdominantly urban
DEA1B	2	intermediate
DEA1C	1	perdominantly urban
DEA1D	1	perdominantly urban
DEA1E	1	perdominantly urban
DEA1F	1	perdominantly urban
DEA22	1	perdominantly urban
DEA23	1	perdominantly urban
DEA24	1	perdominantly urban
DEA26	2	intermediate
DEA27	1	perdominantly urban
DEA28	2	intermediate
DEA29	2	intermediate
DEA2A	2	intermediate
DEA2B	1	perdominantly urban
DEA2C	1	perdominantly urban
DEA2D	1	perdominantly urban
DEA31	1	perdominantly urban
DEA32	1	perdominantly urban
DEA33	1	perdominantly urban
DEA34	2	intermediate
DEA35	1	perdominantly urban
DEA36	1	perdominantly urban
DEA37	2	intermediate
DEA38	2	intermediate
DEA41	1	perdominantly urban
DEA42	1	perdominantly urban
DEA43	1	perdominantly urban
DEA44	3	predominantly rural
DEA45	2	intermediate
DEA46	2	intermediate
DEA47	2	intermediate
DEA51	1	perdominantly urban
DEA52	1	perdominantly urban
DEA53	1	perdominantly urban
DEA54	1	perdominantly urban
DEA55	1	perdominantly urban
DEA56	1	perdominantly urban
DEA57	2	intermediate
DEA58	1	perdominantly urban
DEA59	2	intermediate
DEA5A	2	intermediate
DEA5B	2	intermediate
DEA5C	1	perdominantly urban
DEB11	2	intermediate
DEB12	2	intermediate
DEB13	3	predominantly rural
DEB14	2	intermediate
DEB15	3	predominantly rural
DEB17	2	intermediate
DEB18	2	intermediate
DEB1A	2	intermediate
DEB1B	3	predominantly rural
DEB1C	3	predominantly rural
DEB1D	3	predominantly rural
DEB21	2	intermediate
DEB22	3	predominantly rural
DEB23	3	predominantly rural
DEB24	3	predominantly rural
DEB25	2	intermediate
DEB31	1	perdominantly urban
DEB32	2	intermediate
DEB33	1	perdominantly urban
DEB34	1	perdominantly urban
DEB35	1	perdominantly urban
DEB36	2	intermediate
DEB37	3	predominantly rural
DEB38	1	perdominantly urban
DEB39	1	perdominantly urban
DEB3A	2	intermediate
DEB3B	3	predominantly rural
DEB3C	2	intermediate
DEB3D	3	predominantly rural
DEB3E	1	perdominantly urban
DEB3F	2	intermediate
DEB3G	3	predominantly rural
DEB3H	2	intermediate
DEB3I	1	perdominantly urban
DEB3J	2	intermediate
DEB3K	3	predominantly rural
DEC01	1	perdominantly urban
DEC02	2	intermediate
DEC03	2	intermediate
DEC04	1	perdominantly urban
DEC05	1	perdominantly urban
DEC06	2	intermediate
DED21	1	perdominantly urban
DED2C	3	predominantly rural
DED2D	2	intermediate
DED2E	2	intermediate
DED2F	1	perdominantly urban
DED41	2	intermediate
DED42	2	intermediate
DED43	2	intermediate
DED44	2	intermediate
DED45	2	intermediate
DED51	1	perdominantly urban
DED52	1	perdominantly urban
DED53	3	predominantly rural
DEE01	2	intermediate
DEE02	2	intermediate
DEE03	2	intermediate
DEE04	3	predominantly rural
DEE05	2	intermediate
DEE06	3	predominantly rural
DEE07	2	intermediate
DEE08	3	predominantly rural
DEE09	2	intermediate
DEE0A	3	predominantly rural
DEE0B	2	intermediate
DEE0C	2	intermediate
DEE0D	3	predominantly rural
DEE0E	3	predominantly rural
DEF01	2	intermediate
DEF02	1	perdominantly urban
DEF03	2	intermediate
DEF04	2	intermediate
DEF05	3	predominantly rural
DEF06	2	intermediate
DEF07	3	predominantly rural
DEF08	2	intermediate
DEF09	1	perdominantly urban
DEF0A	1	perdominantly urban
DEF0B	2	intermediate
DEF0C	2	intermediate
DEF0D	2	intermediate
DEF0E	2	intermediate
DEF0F	2	intermediate
DEG01	2	intermediate
DEG02	2	intermediate
DEG03	2	intermediate
DEG04	2	intermediate
DEG05	2	intermediate
DEG06	3	predominantly rural
DEG07	2	intermediate
DEG09	3	predominantly rural
DEG0A	3	predominantly rural
DEG0B	2	intermediate
DEG0C	3	predominantly rural
DEG0D	2	intermediate
DEG0E	3	predominantly rural
DEG0F	3	predominantly rural
DEG0G	2	intermediate
DEG0H	3	predominantly rural
DEG0I	2	intermediate
DEG0J	2	intermediate
DEG0K	3	predominantly rural
DEG0L	2	intermediate
DEG0M	2	intermediate
DEG0N	3	predominantly rural
DEG0P	3	predominantly rural
DK011	1	perdominantly urban
DK012	1	perdominantly urban
DK013	2	intermediate
DK014	3	predominantly rural
DK021	2	intermediate
DK022	3	predominantly rural
DK031	2	intermediate
DK032	2	intermediate
DK041	3	predominantly rural
DK042	2	intermediate
DK050	3	predominantly rural
EE001	1	perdominantly urban
EE004	3	predominantly rural
EE008	3	predominantly rural
EE009	3	predominantly rural
EE00A	1	perdominantly urban
EL301	1	perdominantly urban
EL302	1	perdominantly urban
EL303	1	perdominantly urban
EL304	1	perdominantly urban
EL305	1	perdominantly urban
EL306	1	perdominantly urban
EL307	1	perdominantly urban
EL411	3	predominantly rural
EL412	3	predominantly rural
EL413	2	intermediate
EL421	2	intermediate
EL422	3	predominantly rural
EL431	2	intermediate
EL432	3	predominantly rural
EL433	3	predominantly rural
EL434	2	intermediate
EL511	2	intermediate
EL512	2	intermediate
EL513	3	predominantly rural
EL514	2	intermediate
EL515	3	predominantly rural
EL521	2	intermediate
EL522	1	perdominantly urban
EL523	3	predominantly rural
EL524	3	predominantly rural
EL525	2	intermediate
EL526	3	predominantly rural
EL527	3	predominantly rural
EL531	3	predominantly rural
EL532	2	intermediate
EL533	3	predominantly rural
EL541	3	predominantly rural
EL542	3	predominantly rural
EL543	2	intermediate
EL611	3	predominantly rural
EL612	2	intermediate
EL613	2	intermediate
EL621	3	predominantly rural
EL622	3	predominantly rural
EL623	3	predominantly rural
EL624	3	predominantly rural
EL631	3	predominantly rural
EL632	2	intermediate
EL633	3	predominantly rural
EL641	3	predominantly rural
EL642	3	predominantly rural
EL643	3	predominantly rural
EL644	3	predominantly rural
EL645	3	predominantly rural
EL651	3	predominantly rural
EL652	2	intermediate
EL653	3	predominantly rural
ES111	2	intermediate
ES112	3	predominantly rural
ES113	3	predominantly rural
ES114	2	intermediate
ES120	2	intermediate
ES130	2	intermediate
ES211	1	perdominantly urban
ES212	1	perdominantly urban
ES213	1	perdominantly urban
ES220	2	intermediate
ES230	2	intermediate
ES241	2	intermediate
ES242	3	predominantly rural
ES243	1	perdominantly urban
ES300	1	perdominantly urban
ES411	3	predominantly rural
ES412	2	intermediate
ES413	2	intermediate
ES414	2	intermediate
ES415	2	intermediate
ES416	3	predominantly rural
ES417	3	predominantly rural
ES418	2	intermediate
ES419	3	predominantly rural
ES421	2	intermediate
ES422	2	intermediate
ES423	3	predominantly rural
ES424	2	intermediate
ES425	2	intermediate
ES431	2	intermediate
ES432	2	intermediate
ES511	1	perdominantly urban
ES512	2	intermediate
ES513	2	intermediate
ES514	2	intermediate
ES521	1	perdominantly urban
ES522	2	intermediate
ES523	1	perdominantly urban
ES531	2	intermediate
ES532	1	perdominantly urban
ES533	2	intermediate
ES611	2	intermediate
ES612	1	perdominantly urban
ES613	1	perdominantly urban
ES614	2	intermediate
ES615	2	intermediate
ES616	2	intermediate
ES617	1	perdominantly urban
ES618	1	perdominantly urban
ES620	1	perdominantly urban
ES630	1	perdominantly urban
ES640	2	intermediate
ES703	3	predominantly rural
ES704	2	intermediate
ES705	1	perdominantly urban
ES706	3	predominantly rural
ES707	2	intermediate
ES708	2	intermediate
ES709	1	perdominantly urban
FI193	3	predominantly rural
FI194	3	predominantly rural
FI195	3	predominantly rural
FI196	3	predominantly rural
FI197	2	intermediate
FI1B1	1	perdominantly urban
FI1C1	2	intermediate
FI1C2	2	intermediate
FI1C3	2	intermediate
FI1C4	2	intermediate
FI1C5	2	intermediate
FI1D1	3	predominantly rural
FI1D2	3	predominantly rural
FI1D3	3	predominantly rural
FI1D5	3	predominantly rural
FI1D7	3	predominantly rural
FI1D8	3	predominantly rural
FI1D9	3	predominantly rural
FI200	3	predominantly rural
FR101	1	perdominantly urban
FR102	2	intermediate
FR103	1	perdominantly urban
FR104	1	perdominantly urban
FR105	1	perdominantly urban
FR106	1	perdominantly urban
FR107	1	perdominantly urban
FR108	1	perdominantly urban
FRB01	3	predominantly rural
FRB02	3	predominantly rural
FRB03	3	predominantly rural
FRB04	2	intermediate
FRB05	3	predominantly rural
FRB06	2	intermediate
FRC11	2	intermediate
FRC12	3	predominantly rural
FRC13	3	predominantly rural
FRC14	3	predominantly rural
FRC21	2	intermediate
FRC22	3	predominantly rural
FRC23	3	predominantly rural
FRC24	2	intermediate
FRD11	2	intermediate
FRD12	3	predominantly rural
FRD13	3	predominantly rural
FRD21	3	predominantly rural
FRD22	2	intermediate
FRE11	1	perdominantly urban
FRE12	2	intermediate
FRE21	3	predominantly rural
FRE22	2	intermediate
FRE23	3	predominantly rural
FRF11	2	intermediate
FRF12	2	intermediate
FRF21	3	predominantly rural
FRF22	2	intermediate
FRF23	2	intermediate
FRF24	3	predominantly rural
FRF31	2	intermediate
FRF32	3	predominantly rural
FRF33	2	intermediate
FRF34	3	predominantly rural
FRG01	1	perdominantly urban
FRG02	2	intermediate
FRG03	3	predominantly rural
FRG04	3	predominantly rural
FRG05	3	predominantly rural
FRH01	3	predominantly rural
FRH02	3	predominantly rural
FRH03	2	intermediate
FRH04	3	predominantly rural
FRI11	3	predominantly rural
FRI12	1	perdominantly urban
FRI13	3	predominantly rural
FRI14	3	predominantly rural
FRI15	2	intermediate
FRI21	3	predominantly rural
FRI22	3	predominantly rural
FRI23	3	predominantly rural
FRI31	3	predominantly rural
FRI32	3	predominantly rural
FRI33	3	predominantly rural
FRI34	3	predominantly rural
FRJ11	3	predominantly rural
FRJ12	2	intermediate
FRJ13	2	intermediate
FRJ14	3	predominantly rural
FRJ15	2	intermediate
FRJ21	3	predominantly rural
FRJ22	3	predominantly rural
FRJ23	1	perdominantly urban
FRJ24	3	predominantly rural
FRJ25	3	predominantly rural
FRJ26	3	predominantly rural
FRJ27	3	predominantly rural
FRJ28	3	predominantly rural
FRK11	3	predominantly rural
FRK12	3	predominantly rural
FRK13	3	predominantly rural
FRK14	2	intermediate
FRK21	3	predominantly rural
FRK22	3	predominantly rural
FRK23	3	predominantly rural
FRK24	2	intermediate
FRK25	2	intermediate
FRK26	1	perdominantly urban
FRK27	2	intermediate
FRK28	2	intermediate
FRL01	3	predominantly rural
FRL02	3	predominantly rural
FRL03	1	perdominantly urban
FRL04	1	perdominantly urban
FRL05	2	intermediate
FRL06	2	intermediate
FRM01	3	predominantly rural
FRM02	3	predominantly rural
FRY10	2	intermediate
FRY20	2	intermediate
FRY30	2	intermediate
FRY40	1	perdominantly urban
FRY50	2	intermediate
HR021	3	predominantly rural
HR022	3	predominantly rural
HR023	3	predominantly rural
HR024	2	intermediate
HR025	2	intermediate
HR026	3	predominantly rural
HR027	3	predominantly rural
HR028	3	predominantly rural
HR031	2	intermediate
HR032	3	predominantly rural
HR033	3	predominantly rural
HR034	2	intermediate
HR035	2	intermediate
HR036	3	predominantly rural
HR037	2	intermediate
HR050	1	perdominantly urban
HR061	3	predominantly rural
HR062	2	intermediate
HR063	3	predominantly rural
HR064	3	predominantly rural
HR065	3	predominantly rural
HU110	1	perdominantly urban
HU120	2	intermediate
HU211	2	intermediate
HU212	2	intermediate
HU213	2	intermediate
HU221	2	intermediate
HU222	2	intermediate
HU223	3	predominantly rural
HU231	2	intermediate
HU232	3	predominantly rural
HU233	3	predominantly rural
HU311	2	intermediate
HU312	3	predominantly rural
HU313	3	predominantly rural
HU321	2	intermediate
HU322	2	intermediate
HU323	3	predominantly rural
HU331	2	intermediate
HU332	2	intermediate
HU333	2	intermediate
IE041	3	predominantly rural
IE042	3	predominantly rural
IE051	3	predominantly rural
IE052	3	predominantly rural
IE053	3	predominantly rural
IE061	1	perdominantly urban
IE062	2	intermediate
IE063	3	predominantly rural
IS001	1	perdominantly urban
IS002	3	predominantly rural
ITC11	1	perdominantly urban
ITC12	2	intermediate
ITC13	2	intermediate
ITC14	2	intermediate
ITC15	2	intermediate
ITC16	3	predominantly rural
ITC17	3	predominantly rural
ITC18	3	predominantly rural
ITC20	2	intermediate
ITC31	1	perdominantly urban
ITC32	2	intermediate
ITC33	1	perdominantly urban
ITC34	1	perdominantly urban
ITC41	1	perdominantly urban
ITC42	1	perdominantly urban
ITC43	1	perdominantly urban
ITC44	2	intermediate
ITC46	1	perdominantly urban
ITC47	2	intermediate
ITC48	2	intermediate
ITC49	2	intermediate
ITC4A	2	intermediate
ITC4B	3	predominantly rural
ITC4C	1	perdominantly urban
ITC4D	1	perdominantly urban
ITF11	3	predominantly rural
ITF12	2	intermediate
ITF13	2	intermediate
ITF14	2	intermediate
ITF21	3	predominantly rural
ITF22	3	predominantly rural
ITF31	1	perdominantly urban
ITF32	3	predominantly rural
ITF33	1	perdominantly urban
ITF34	2	intermediate
ITF35	2	intermediate
ITF43	1	perdominantly urban
ITF44	1	perdominantly urban
ITF45	1	perdominantly urban
ITF46	3	predominantly rural
ITF47	1	perdominantly urban
ITF48	1	perdominantly urban
ITF51	3	predominantly rural
ITF52	2	intermediate
ITF61	2	intermediate
ITF62	2	intermediate
ITF63	2	intermediate
ITF64	3	predominantly rural
ITF65	2	intermediate
ITG11	2	intermediate
ITG12	1	perdominantly urban
ITG13	2	intermediate
ITG14	2	intermediate
ITG15	1	perdominantly urban
ITG16	2	intermediate
ITG17	1	perdominantly urban
ITG18	2	intermediate
ITG19	1	perdominantly urban
ITG2D	2	intermediate
ITG2E	3	predominantly rural
ITG2F	1	perdominantly urban
ITG2G	3	predominantly rural
ITG2H	3	predominantly rural
ITH10	3	predominantly rural
ITH20	2	intermediate
ITH31	2	intermediate
ITH32	2	intermediate
ITH33	3	predominantly rural
ITH34	2	intermediate
ITH35	1	perdominantly urban
ITH36	2	intermediate
ITH37	3	predominantly rural
ITH41	2	intermediate
ITH42	2	intermediate
ITH43	1	perdominantly urban
ITH44	1	perdominantly urban
ITH51	2	intermediate
ITH52	2	intermediate
ITH53	2	intermediate
ITH54	2	intermediate
ITH55	2	intermediate
ITH56	2	intermediate
ITH57	2	intermediate
ITH58	2	intermediate
ITH59	1	perdominantly urban
ITI11	2	intermediate
ITI12	2	intermediate
ITI13	1	perdominantly urban
ITI14	1	perdominantly urban
ITI15	1	perdominantly urban
ITI16	2	intermediate
ITI17	2	intermediate
ITI18	2	intermediate
ITI19	3	predominantly rural
ITI1A	3	predominantly rural
ITI21	2	intermediate
ITI22	2	intermediate
ITI31	2	intermediate
ITI32	2	intermediate
ITI33	2	intermediate
ITI34	2	intermediate
ITI35	2	intermediate
ITI41	3	predominantly rural
ITI42	3	predominantly rural
ITI43	1	perdominantly urban
ITI44	2	intermediate
ITI45	2	intermediate
LI000	1	perdominantly urban
LT011	1	perdominantly urban
LT021	2	intermediate
LT022	2	intermediate
LT023	2	intermediate
LT024	3	predominantly rural
LT025	2	intermediate
LT026	2	intermediate
LT027	3	predominantly rural
LT028	2	intermediate
LT029	2	intermediate
LU000	2	intermediate
LV003	2	intermediate
LV005	2	intermediate
LV006	1	perdominantly urban
LV007	2	intermediate
LV008	3	predominantly rural
LV009	3	predominantly rural
ME000	2	intermediate
MK001	2	intermediate
MK002	1	perdominantly urban
MK003	2	intermediate
MK004	2	intermediate
MK005	2	intermediate
MK006	1	perdominantly urban
MK007	1	perdominantly urban
MK008	1	perdominantly urban
MT001	1	perdominantly urban
MT002	1	perdominantly urban
NL111	2	intermediate
NL112	2	intermediate
NL113	2	intermediate
NL124	2	intermediate
NL125	2	intermediate
NL126	2	intermediate
NL131	2	intermediate
NL132	2	intermediate
NL133	2	intermediate
NL211	2	intermediate
NL212	2	intermediate
NL213	1	perdominantly urban
NL221	1	perdominantly urban
NL224	2	intermediate
NL225	2	intermediate
NL226	1	perdominantly urban
NL230	1	perdominantly urban
NL310	1	perdominantly urban
NL321	1	perdominantly urban
NL323	1	perdominantly urban
NL324	1	perdominantly urban
NL325	1	perdominantly urban
NL327	1	perdominantly urban
NL328	1	perdominantly urban
NL329	1	perdominantly urban
NL332	1	perdominantly urban
NL333	1	perdominantly urban
NL337	1	perdominantly urban
NL33A	1	perdominantly urban
NL33B	1	perdominantly urban
NL33C	1	perdominantly urban
NL341	3	predominantly rural
NL342	2	intermediate
NL411	1	perdominantly urban
NL412	1	perdominantly urban
NL413	2	intermediate
NL414	1	perdominantly urban
NL421	2	intermediate
NL422	2	intermediate
NL423	1	perdominantly urban
NO020	3	predominantly rural
NO060	2	intermediate
NO071	3	predominantly rural
NO074	3	predominantly rural
NO081	1	perdominantly urban
NO082	2	intermediate
NO091	2	intermediate
NO092	2	intermediate
NO0A1	2	intermediate
NO0A2	2	intermediate
NO0A3	3	predominantly rural
NO0B1	3	predominantly rural
NO0B2	3	predominantly rural
PL213	1	perdominantly urban
PL214	2	intermediate
PL217	3	predominantly rural
PL218	3	predominantly rural
PL219	3	predominantly rural
PL21A	2	intermediate
PL224	2	intermediate
PL225	2	intermediate
PL227	1	perdominantly urban
PL228	1	perdominantly urban
PL229	1	perdominantly urban
PL22A	1	perdominantly urban
PL22B	1	perdominantly urban
PL22C	1	perdominantly urban
PL411	3	predominantly rural
PL414	3	predominantly rural
PL415	1	perdominantly urban
PL416	3	predominantly rural
PL417	3	predominantly rural
PL418	2	intermediate
PL424	2	intermediate
PL426	2	intermediate
PL427	3	predominantly rural
PL428	2	intermediate
PL431	2	intermediate
PL432	2	intermediate
PL514	1	perdominantly urban
PL515	2	intermediate
PL516	2	intermediate
PL517	2	intermediate
PL518	2	intermediate
PL523	3	predominantly rural
PL524	2	intermediate
PL613	1	perdominantly urban
PL616	3	predominantly rural
PL617	3	predominantly rural
PL618	3	predominantly rural
PL619	3	predominantly rural
PL621	2	intermediate
PL622	2	intermediate
PL623	2	intermediate
PL633	1	perdominantly urban
PL634	2	intermediate
PL636	2	intermediate
PL637	3	predominantly rural
PL638	2	intermediate
PL711	1	perdominantly urban
PL712	1	perdominantly urban
PL713	3	predominantly rural
PL714	3	predominantly rural
PL715	3	predominantly rural
PL721	2	intermediate
PL722	3	predominantly rural
PL811	3	predominantly rural
PL812	3	predominantly rural
PL814	2	intermediate
PL815	3	predominantly rural
PL821	3	predominantly rural
PL822	3	predominantly rural
PL823	3	predominantly rural
PL824	3	predominantly rural
PL841	2	intermediate
PL842	3	predominantly rural
PL843	3	predominantly rural
PL911	1	perdominantly urban
PL912	2	intermediate
PL913	2	intermediate
PL921	2	intermediate
PL922	3	predominantly rural
PL923	3	predominantly rural
PL924	3	predominantly rural
PL925	3	predominantly rural
PL926	3	predominantly rural
PT111	3	predominantly rural
PT112	2	intermediate
PT119	2	intermediate
PT11A	1	perdominantly urban
PT11B	3	predominantly rural
PT11C	2	intermediate
PT11D	3	predominantly rural
PT11E	3	predominantly rural
PT150	2	intermediate
PT16B	3	predominantly rural
PT16D	2	intermediate
PT16E	3	predominantly rural
PT16F	3	predominantly rural
PT16G	3	predominantly rural
PT16H	3	predominantly rural
PT16I	3	predominantly rural
PT16J	3	predominantly rural
PT170	1	perdominantly urban
PT181	3	predominantly rural
PT184	3	predominantly rural
PT185	3	predominantly rural
PT186	3	predominantly rural
PT187	3	predominantly rural
PT200	2	intermediate
PT300	1	perdominantly urban
RO111	3	predominantly rural
RO112	3	predominantly rural
RO113	2	intermediate
RO114	3	predominantly rural
RO115	3	predominantly rural
RO116	3	predominantly rural
RO121	3	predominantly rural
RO122	2	intermediate
RO123	3	predominantly rural
RO124	3	predominantly rural
RO125	3	predominantly rural
RO126	2	intermediate
RO211	3	predominantly rural
RO212	3	predominantly rural
RO213	2	intermediate
RO214	3	predominantly rural
RO215	3	predominantly rural
RO216	3	predominantly rural
RO221	2	intermediate
RO222	3	predominantly rural
RO223	2	intermediate
RO224	2	intermediate
RO225	3	predominantly rural
RO226	3	predominantly rural
RO311	3	predominantly rural
RO312	3	predominantly rural
RO313	3	predominantly rural
RO314	3	predominantly rural
RO315	3	predominantly rural
RO316	2	intermediate
RO317	3	predominantly rural
RO321	1	perdominantly urban
RO322	1	perdominantly urban
RO411	2	intermediate
RO412	3	predominantly rural
RO413	3	predominantly rural
RO414	3	predominantly rural
RO415	3	predominantly rural
RO421	2	intermediate
RO422	3	predominantly rural
RO423	2	intermediate
RO424	2	intermediate
RS110	1	perdominantly urban
RS121	2	intermediate
RS122	2	intermediate
RS123	2	intermediate
RS124	2	intermediate
RS125	2	intermediate
RS126	2	intermediate
RS127	2	intermediate
RS211	2	intermediate
RS212	3	predominantly rural
RS213	3	predominantly rural
RS214	2	intermediate
RS215	3	predominantly rural
RS216	3	predominantly rural
RS217	2	intermediate
RS218	2	intermediate
RS221	2	intermediate
RS222	3	predominantly rural
RS223	2	intermediate
RS224	2	intermediate
RS225	2	intermediate
RS226	2	intermediate
RS227	2	intermediate
RS228	2	intermediate
RS229	2	intermediate
SE110	1	perdominantly urban
SE121	2	intermediate
SE122	2	intermediate
SE123	2	intermediate
SE124	2	intermediate
SE125	2	intermediate
SE211	2	intermediate
SE212	3	predominantly rural
SE213	3	predominantly rural
SE214	3	predominantly rural
SE221	2	intermediate
SE224	2	intermediate
SE231	2	intermediate
SE232	1	perdominantly urban
SE311	2	intermediate
SE312	3	predominantly rural
SE313	2	intermediate
SE321	2	intermediate
SE322	3	predominantly rural
SE331	2	intermediate
SE332	2	intermediate
SI031	3	predominantly rural
SI032	3	predominantly rural
SI033	3	predominantly rural
SI034	3	predominantly rural
SI035	3	predominantly rural
SI036	3	predominantly rural
SI037	3	predominantly rural
SI038	3	predominantly rural
SI041	2	intermediate
SI042	2	intermediate
SI043	3	predominantly rural
SI044	2	intermediate
SK010	1	perdominantly urban
SK021	3	predominantly rural
SK022	2	intermediate
SK023	2	intermediate
SK031	2	intermediate
SK032	3	predominantly rural
SK041	3	predominantly rural
SK042	2	intermediate
TR100	1	perdominantly urban
TR211	2	intermediate
TR212	2	intermediate
TR213	2	intermediate
TR221	2	intermediate
TR222	2	intermediate
TR310	1	perdominantly urban
TR321	2	intermediate
TR322	2	intermediate
TR323	2	intermediate
TR331	2	intermediate
TR332	2	intermediate
TR333	2	intermediate
TR334	2	intermediate
TR411	1	perdominantly urban
TR412	2	intermediate
TR413	2	intermediate
TR421	1	perdominantly urban
TR422	1	perdominantly urban
TR423	1	perdominantly urban
TR424	2	intermediate
TR425	1	perdominantly urban
TR510	1	perdominantly urban
TR521	2	intermediate
TR522	2	intermediate
TR611	1	perdominantly urban
TR612	2	intermediate
TR613	2	intermediate
TR621	1	perdominantly urban
TR622	1	perdominantly urban
TR631	1	perdominantly urban
TR632	2	intermediate
TR633	1	perdominantly urban
TR711	1	perdominantly urban
TR712	2	intermediate
TR713	2	intermediate
TR714	2	intermediate
TR715	2	intermediate
TR721	1	perdominantly urban
TR722	2	intermediate
TR723	2	intermediate
TR811	1	perdominantly urban
TR812	2	intermediate
TR813	2	intermediate
TR821	2	intermediate
TR822	3	predominantly rural
TR823	2	intermediate
TR831	2	intermediate
TR832	2	intermediate
TR833	2	intermediate
TR834	2	intermediate
TR901	1	perdominantly urban
TR902	2	intermediate
TR903	2	intermediate
TR904	2	intermediate
TR905	3	predominantly rural
TR906	3	predominantly rural
TRA11	2	intermediate
TRA12	2	intermediate
TRA13	3	predominantly rural
TRA21	2	intermediate
TRA22	2	intermediate
TRA23	2	intermediate
TRA24	2	intermediate
TRB11	2	intermediate
TRB12	2	intermediate
TRB13	3	predominantly rural
TRB14	3	predominantly rural
TRB21	2	intermediate
TRB22	2	intermediate
TRB23	2	intermediate
TRB24	2	intermediate
TRC11	1	perdominantly urban
TRC12	2	intermediate
TRC13	2	intermediate
TRC21	2	intermediate
TRC22	2	intermediate
TRC31	2	intermediate
TRC32	2	intermediate
TRC33	2	intermediate
TRC34	2	intermediate
UKC11	1	perdominantly urban
UKC12	1	perdominantly urban
UKC13	1	perdominantly urban
UKC14	1	perdominantly urban
UKC21	2	intermediate
UKC22	1	perdominantly urban
UKC23	1	perdominantly urban
UKD11	2	intermediate
UKD12	2	intermediate
UKD33	1	perdominantly urban
UKD34	1	perdominantly urban
UKD35	1	perdominantly urban
UKD36	1	perdominantly urban
UKD37	1	perdominantly urban
UKD41	1	perdominantly urban
UKD42	1	perdominantly urban
UKD44	1	perdominantly urban
UKD45	1	perdominantly urban
UKD46	1	perdominantly urban
UKD47	1	perdominantly urban
UKD61	1	perdominantly urban
UKD62	1	perdominantly urban
UKD63	1	perdominantly urban
UKD71	1	perdominantly urban
UKD72	1	perdominantly urban
UKD73	1	perdominantly urban
UKD74	1	perdominantly urban
UKE11	1	perdominantly urban
UKE12	1	perdominantly urban
UKE13	2	intermediate
UKE21	2	intermediate
UKE22	2	intermediate
UKE31	1	perdominantly urban
UKE32	1	perdominantly urban
UKE41	1	perdominantly urban
UKE42	1	perdominantly urban
UKE44	1	perdominantly urban
UKE45	1	perdominantly urban
UKF11	1	perdominantly urban
UKF12	1	perdominantly urban
UKF13	1	perdominantly urban
UKF14	1	perdominantly urban
UKF15	1	perdominantly urban
UKF16	1	perdominantly urban
UKF21	1	perdominantly urban
UKF22	1	perdominantly urban
UKF24	2	intermediate
UKF25	1	perdominantly urban
UKF30	2	intermediate
UKG11	3	predominantly rural
UKG12	2	intermediate
UKG13	1	perdominantly urban
UKG21	2	intermediate
UKG22	2	intermediate
UKG23	1	perdominantly urban
UKG24	1	perdominantly urban
UKG31	1	perdominantly urban
UKG32	1	perdominantly urban
UKG33	1	perdominantly urban
UKG36	1	perdominantly urban
UKG37	1	perdominantly urban
UKG38	1	perdominantly urban
UKG39	1	perdominantly urban
UKH11	1	perdominantly urban
UKH12	2	intermediate
UKH14	2	intermediate
UKH15	1	perdominantly urban
UKH16	3	predominantly rural
UKH17	3	predominantly rural
UKH21	1	perdominantly urban
UKH23	1	perdominantly urban
UKH24	1	perdominantly urban
UKH25	1	perdominantly urban
UKH31	1	perdominantly urban
UKH32	1	perdominantly urban
UKH34	2	intermediate
UKH35	2	intermediate
UKH36	1	perdominantly urban
UKH37	1	perdominantly urban
UKI31	1	perdominantly urban
UKI32	1	perdominantly urban
UKI33	1	perdominantly urban
UKI34	1	perdominantly urban
UKI41	1	perdominantly urban
UKI42	1	perdominantly urban
UKI43	1	perdominantly urban
UKI44	1	perdominantly urban
UKI45	1	perdominantly urban
UKI51	1	perdominantly urban
UKI52	1	perdominantly urban
UKI53	1	perdominantly urban
UKI54	1	perdominantly urban
UKI61	1	perdominantly urban
UKI62	1	perdominantly urban
UKI63	1	perdominantly urban
UKI71	1	perdominantly urban
UKI72	1	perdominantly urban
UKI73	1	perdominantly urban
UKI74	1	perdominantly urban
UKI75	1	perdominantly urban
UKJ11	1	perdominantly urban
UKJ12	1	perdominantly urban
UKJ13	2	intermediate
UKJ14	2	intermediate
UKJ21	1	perdominantly urban
UKJ22	2	intermediate
UKJ25	1	perdominantly urban
UKJ26	1	perdominantly urban
UKJ27	1	perdominantly urban
UKJ28	1	perdominantly urban
UKJ31	1	perdominantly urban
UKJ32	1	perdominantly urban
UKJ34	2	intermediate
UKJ35	1	perdominantly urban
UKJ36	1	perdominantly urban
UKJ37	1	perdominantly urban
UKJ41	1	perdominantly urban
UKJ43	1	perdominantly urban
UKJ44	1	perdominantly urban
UKJ45	2	intermediate
UKJ46	2	intermediate
UKK11	1	perdominantly urban
UKK12	1	perdominantly urban
UKK13	2	intermediate
UKK14	2	intermediate
UKK15	2	intermediate
UKK23	2	intermediate
UKK24	1	perdominantly urban
UKK25	2	intermediate
UKK30	2	intermediate
UKK41	1	perdominantly urban
UKK42	1	perdominantly urban
UKK43	2	intermediate
UKL11	3	predominantly rural
UKL12	3	predominantly rural
UKL13	2	intermediate
UKL14	3	predominantly rural
UKL15	1	perdominantly urban
UKL16	1	perdominantly urban
UKL17	1	perdominantly urban
UKL18	1	perdominantly urban
UKL21	1	perdominantly urban
UKL22	1	perdominantly urban
UKL23	1	perdominantly urban
UKL24	3	predominantly rural
UKM50	2	intermediate
UKM61	3	predominantly rural
UKM62	2	intermediate
UKM63	3	predominantly rural
UKM64	3	predominantly rural
UKM65	3	predominantly rural
UKM66	3	predominantly rural
UKM71	1	perdominantly urban
UKM72	1	perdominantly urban
UKM73	1	perdominantly urban
UKM75	1	perdominantly urban
UKM76	1	perdominantly urban
UKM77	2	intermediate
UKM78	1	perdominantly urban
UKM81	1	perdominantly urban
UKM82	1	perdominantly urban
UKM83	1	perdominantly urban
UKM84	1	perdominantly urban
UKM91	3	predominantly rural
UKM92	3	predominantly rural
UKM93	2	intermediate
UKM94	2	intermediate
UKM95	1	perdominantly urban
UKN06	1	perdominantly urban
UKN07	2	intermediate
UKN08	3	predominantly rural
UKN09	1	perdominantly urban
UKN0A	2	intermediate
UKN0B	3	predominantly rural
UKN0C	3	predominantly rural
UKN0D	2	intermediate
UKN0E	2	intermediate
UKN0F	2	intermediate
UKN0G	3	predominantly rural

## Sheet: Metropolitan
NUTS ID	METRO (No/Yes)	METRO CODE	METRO LABEL
AL011	N
AL012	N
AL013	N
AL014	N
AL015	N
AL021	N
AL022	N
AL031	N
AL032	N
AL033	N
AL034	N
AL035	N
AT111	N
AT112	Y	AT001MC	Wien
AT113	N
AT121	N
AT122	N
AT123	N
AT124	N
AT125	Y	AT001MC	Wien
AT126	Y	AT001MC	Wien
AT127	Y	AT001MC	Wien
AT130	Y	AT001MC	Wien
AT211	N
AT212	N
AT213	N
AT221	Y	AT002M	Graz
AT222	N
AT223	N
AT224	N
AT225	Y	AT002M	Graz
AT226	N
AT311	N
AT312	Y	AT003M	Linz
AT313	Y	AT003M	Linz
AT314	N
AT315	N
AT321	N
AT322	N
AT323	Y	AT004M	Salzburg
AT331	N
AT332	Y	AT005M	Innsbruck
AT333	N
AT334	N
AT335	N
AT341	N
AT342	N
BE100	Y	BE001MC	Bruxelles / Brussel
BE211	Y	BE002M	Antwerpen
BE212	N
BE213	N
BE223	N
BE224	N
BE225	N
BE231	Y	BE001MC	Bruxelles / Brussel
BE232	N
BE233	Y	BE003M	Gent
BE234	Y	BE003M	Gent
BE235	N
BE236	N
BE241	Y	BE001MC	Bruxelles / Brussel
BE242	Y	BE001MC	Bruxelles / Brussel
BE251	N
BE252	N
BE253	N
BE254	N
BE255	N
BE256	N
BE257	N
BE258	N
BE310	Y	BE001MC	Bruxelles / Brussel
BE323	N
BE328	N
BE329	N
BE32A	Y	BE001MC	Bruxelles / Brussel
BE32B	Y	BE004M	Charleroi
BE32C	Y	BE001MC	Bruxelles / Brussel
BE32D	Y	BE004M	Charleroi
BE331	Y	BE005M	Liège
BE332	Y	BE005M	Liège
BE334	Y	BE005M	Liège
BE335	N
BE336	N
BE341	N
BE342	N
BE343	N
BE344	N
BE345	N
BE351	N
BE352	Y	BE007M	Arr. Namur
BE353	Y	BE004M	Charleroi
BG311	N
BG312	N
BG313	N
BG314	N
BG315	N
BG321	N
BG322	N
BG323	N
BG324	N
BG325	N
BG331	Y	BG003M	Varna
BG332	N
BG333	N
BG334	N
BG341	Y	BG004M	Burgas
BG342	N
BG343	N
BG344	N
BG411	Y	BG001MC	Sofia
BG412	Y	BG001MC	Sofia
BG413	N
BG414	Y	BG001MC	Sofia
BG415	N
BG421	Y	BG002M	Plovdiv
BG422	N
BG423	N
BG424	N
BG425	N
CH011	Y	CH005M	Lausanne
CH012	N
CH013	Y	CH002M	Genève
CH021	Y	CH004MC	Bern
CH022	N
CH023	N
CH024	N
CH025	N
CH031	Y	CH003M	Basel
CH032	Y	CH003M	Basel
CH033	N
CH040	Y	CH001M	Zürich
CH051	N
CH052	N
CH053	Y	CH006M	Appenzell Ausserrhoden
CH054	N
CH055	Y	CH006M	St. Gallen
CH056	N
CH057	N
CH061	Y	CH007M	Luzern
CH062	N
CH063	N
CH064	N
CH065	Y	CH007M	Nidwalden
CH066	N
CH070	N
CY000	Y	CY001MC	Lefkosia
CZ010	Y	CZ001MC	Praha
CZ020	Y	CZ001MC	Praha
CZ031	N
CZ032	Y	CZ004M	Plzen
CZ041	N
CZ042	N
CZ051	N
CZ052	N
CZ053	N
CZ063	N
CZ064	Y	CZ002M	Brno
CZ071	N
CZ072	N
CZ080	Y	CZ003M	Ostrava
DE111	Y	DE007M	Stuttgart
DE112	Y	DE007M	Stuttgart
DE113	Y	DE007M	Stuttgart
DE114	Y	DE007M	Stuttgart
DE115	Y	DE007M	Stuttgart
DE116	Y	DE007M	Stuttgart
DE117	Y	DE529M	Heilbronn
DE118	Y	DE529M	Heilbronn
DE119	N
DE11A	N
DE11B	N
DE11C	N
DE11D	N
DE121	N
DE122	Y	DE035M	Karlsruhe
DE123	Y	DE035M	Karlsruhe
DE124	N
DE125	Y	DE522M	Heidelberg
DE126	Y	DE084M	Mannheim-Ludwigshafen
DE127	N
DE128	Y	DE522M	Heidelberg
DE129	Y	DE533M	Pforzheim
DE12A	N
DE12B	Y	DE533M	Pforzheim
DE12C	N
DE131	Y	DE027M	Freiburg im Breisgau
DE132	Y	DE027M	Freiburg im Breisgau
DE133	Y	DE027M	Freiburg im Breisgau
DE134	Y	DE073M	Offenburg
DE135	N
DE136	N
DE137	N
DE138	Y	DE054M	Konstanz
DE139	Y	CH003M	Basel
DE13A	N
DE141	Y	DE537M	Reutlingen
DE142	N
DE143	N
DE144	Y	DE532M	Ulm
DE145	Y	DE532M	Ulm
DE146	N
DE147	N
DE148	N
DE149	N
DE211	Y	DE534M	Ingolstadt
DE212	Y	DE003M	München
DE213	Y	DE069M	Rosenheim
DE214	N
DE215	N
DE216	N
DE217	Y	DE003M	München
DE218	Y	DE003M	München
DE219	Y	DE534M	Ingolstadt
DE21A	Y	DE003M	München
DE21B	Y	DE003M	München
DE21C	Y	DE003M	München
DE21D	N
DE21E	Y	DE003M	München
DE21F	N
DE21G	N
DE21H	Y	DE003M	München
DE21I	Y	DE534M	Ingolstadt
DE21J	Y	DE534M	Ingolstadt
DE21K	Y	DE069M	Rosenheim
DE21L	Y	DE003M	München
DE21M	N
DE21N	N
DE221	N
DE222	N
DE223	N
DE224	N
DE225	N
DE226	Y	DE028M	Regensburg
DE227	N
DE228	N
DE229	N
DE22A	N
DE22B	N
DE22C	N
DE231	N
DE232	Y	DE028M	Regensburg
DE233	N
DE234	N
DE235	N
DE236	N
DE237	N
DE238	Y	DE028M	Regensburg
DE239	N
DE23A	N
DE241	N
DE242	Y	DE059M	Bayreuth
DE243	N
DE244	N
DE245	N
DE246	Y	DE059M	Bayreuth
DE247	N
DE248	N
DE249	N
DE24A	N
DE24B	Y	DE059M	Bayreuth
DE24C	N
DE24D	N
DE251	N
DE252	Y	DE014M	Nürnberg
DE253	Y	DE014M	Nürnberg
DE254	Y	DE014M	Nürnberg
DE255	Y	DE014M	Nürnberg
DE256	N
DE257	Y	DE014M	Nürnberg
DE258	Y	DE014M	Nürnberg
DE259	Y	DE014M	Nürnberg
DE25A	N
DE25B	Y	DE014M	Nürnberg
DE25C	N
DE261	Y	DE061M	Aschaffenburg
DE262	Y	DE077M	Schweinfurt
DE263	Y	DE524M	Würzburg
DE264	Y	DE061M	Aschaffenburg
DE265	Y	DE077M	Schweinfurt
DE266	N
DE267	N
DE268	Y	DE524M	Würzburg
DE269	Y	DE061M	Aschaffenburg
DE26A	Y	DE524M	Würzburg
DE26B	Y	DE077M	Schweinfurt
DE26C	Y	DE524M	Würzburg
DE271	Y	DE033M	Augsburg
DE272	N
DE273	N
DE274	N
DE275	Y	DE033M	Augsburg
DE276	Y	DE033M	Augsburg
DE277	N
DE278	N
DE279	Y	DE532M	Ulm
DE27A	N
DE27B	N
DE27C	N
DE27D	N
DE27E	N
DE300	Y	DE001MC	Berlin
DE401	N
DE402	N
DE403	N
DE404	Y	DE001MC	Berlin
DE405	Y	DE001MC	Berlin
DE406	Y	DE001MC	Berlin
DE407	N
DE408	Y	DE001MC	Berlin
DE409	Y	DE001MC	Berlin
DE40A	Y	DE001MC	Berlin
DE40B	N
DE40C	Y	DE001MC	Berlin
DE40D	N
DE40E	Y	DE001MC	Berlin
DE40F	N
DE40G	N
DE40H	Y	DE001MC	Berlin
DE40I	N
DE501	Y	DE012M	Bremen
DE502	Y	DE527M	Bremerhaven
DE600	Y	DE002M	Hamburg
DE711	Y	DE025M	Darmstadt
DE712	Y	DE005M	Frankfurt am Main
DE713	Y	DE005M	Frankfurt am Main
DE714	Y	DE020M	Wiesbaden
DE715	Y	DE084M	Mannheim-Ludwigshafen
DE716	Y	DE025M	Darmstadt
DE717	Y	DE005M	Frankfurt am Main
DE718	Y	DE005M	Frankfurt am Main
DE719	Y	DE005M	Frankfurt am Main
DE71A	Y	DE005M	Frankfurt am Main
DE71B	N
DE71C	Y	DE005M	Frankfurt am Main
DE71D	Y	DE020M	Wiesbaden
DE71E	Y	DE005M	Frankfurt am Main
DE721	Y	DE057M	Gießen
DE722	Y	DE079M	Wetzlar
DE723	N
DE724	N
DE725	N
DE731	Y	DE513M	Kassel
DE732	N
DE733	N
DE734	Y	DE513M	Kassel
DE735	N
DE736	N
DE737	N
DE803	Y	DE043M	Rostock
DE804	Y	DE031M	Schwerin
DE80J	Y	DE064M	Neubrandenburg
DE80K	Y	DE043M	Rostock
DE80L	N
DE80M	N
DE80N	N
DE80O	Y	DE031M	Schwerin
DE911	Y	DE083M	Braunschweig-Salzgitter-Wolfsburg
DE912	Y	DE083M	Braunschweig-Salzgitter-Wolfsburg
DE913	Y	DE083M	Braunschweig-Salzgitter-Wolfsburg
DE914	Y	DE083M	Braunschweig-Salzgitter-Wolfsburg
DE916	N
DE917	Y	DE083M	Braunschweig-Salzgitter-Wolfsburg
DE918	Y	DE021M	Göttingen
DE91A	Y	DE083M	Braunschweig-Salzgitter-Wolfsburg
DE91B	Y	DE083M	Braunschweig-Salzgitter-Wolfsburg
DE91C	Y	DE021M	Göttingen
DE922	Y	DE012M	Bremen
DE923	N
DE925	Y	DE542M	Hildesheim
DE926	N
DE927	N
DE928	Y	DE013M	Hannover
DE929	Y	DE013M	Hannover
DE931	N
DE932	Y	DE527M	Bremerhaven
DE933	Y	DE002M	Hamburg
DE934	N
DE935	N
DE936	Y	DE012M	Bremen
DE937	Y	DE012M	Bremen
DE938	N
DE939	Y	DE002M	Hamburg
DE93A	N
DE93B	Y	DE012M	Bremen
DE941	Y	DE012M	Bremen
DE942	N
DE943	Y	DE520M	Oldenburg (Oldenburg)
DE944	Y	DE517M	Osnabrück
DE945	N
DE946	Y	DE520M	Oldenburg (Oldenburg)
DE947	N
DE948	N
DE949	N
DE94A	N
DE94B	N
DE94C	N
DE94D	Y	DE520M	Oldenburg (Oldenburg)
DE94E	Y	DE517M	Osnabrück
DE94F	N
DE94G	N
DE94H	N
DEA11	Y	DE011M	Düsseldorf
DEA12	Y	DE038M	Ruhrgebiet
DEA13	Y	DE038M	Ruhrgebiet
DEA14	N
DEA15	Y	DE036M	Mönchengladbach
DEA16	Y	DE038M	Ruhrgebiet
DEA17	Y	DE038M	Ruhrgebiet
DEA18	N
DEA19	N
DEA1A	Y	DE546M	Wuppertal
DEA1B	N
DEA1C	Y	DE011M	Düsseldorf
DEA1D	Y	DE011M	Düsseldorf
DEA1E	N
DEA1F	Y	DE038M	Ruhrgebiet
DEA22	Y	DE034M	Bonn
DEA23	Y	DE004M	Köln
DEA24	Y	DE004M	Köln
DEA26	Y	DE548M	Düren
DEA27	Y	DE004M	Köln
DEA28	N
DEA29	N
DEA2A	N
DEA2B	Y	DE004M	Köln
DEA2C	Y	DE034M	Bonn
DEA2D	Y	DE507M	Aachen
DEA31	Y	DE038M	Ruhrgebiet
DEA32	Y	DE038M	Ruhrgebiet
DEA33	Y	DE504M	Münster
DEA34	Y	DE549M	Bocholt
DEA35	Y	DE504M	Münster
DEA36	Y	DE038M	Ruhrgebiet
DEA37	N
DEA38	N
DEA41	Y	DE017M	Bielefeld
DEA42	N
DEA43	N
DEA44	N
DEA45	N
DEA46	N
DEA47	Y	DE523M	Paderborn
DEA51	Y	DE038M	Ruhrgebiet
DEA52	Y	DE038M	Ruhrgebiet
DEA53	Y	DE038M	Ruhrgebiet
DEA54	Y	DE038M	Ruhrgebiet
DEA55	Y	DE038M	Ruhrgebiet
DEA56	Y	DE038M	Ruhrgebiet
DEA57	N
DEA58	Y	DE045M	Iserlohn
DEA59	N
DEA5A	Y	DE540M	Siegen
DEA5B	N
DEA5C	Y	DE038M	Ruhrgebiet
DEB11	Y	DE042M	Koblenz
DEB12	N
DEB13	Y	DE540M	Siegen
DEB14	N
DEB15	N
DEB17	Y	DE042M	Koblenz
DEB18	N
DEB1A	N
DEB1B	N
DEB1C	N
DEB1D	N
DEB21	N
DEB22	N
DEB23	N
DEB24	N
DEB25	N
DEB31	Y	DE084M	Mannheim-Ludwigshafen
DEB32	Y	DE044M	Kaiserslautern
DEB33	N
DEB34	Y	DE084M	Mannheim-Ludwigshafen
DEB35	Y	DE037M	Mainz
DEB36	Y	DE084M	Mannheim-Ludwigshafen
DEB37	N
DEB38	Y	DE084M	Mannheim-Ludwigshafen
DEB39	N
DEB3A	N
DEB3B	N
DEB3C	Y	DE084M	Mannheim-Ludwigshafen
DEB3D	N
DEB3E	N
DEB3F	Y	DE044M	Kaiserslautern
DEB3G	Y	DE044M	Kaiserslautern
DEB3H	N
DEB3I	Y	DE084M	Mannheim-Ludwigshafen
DEB3J	Y	DE037M	Mainz
DEB3K	N
DEC01	Y	DE040M	Saarbrücken
DEC02	N
DEC03	Y	DE040M	Saarbrücken
DEC04	Y	DE040M	Saarbrücken
DEC05	Y	DE040M	Saarbrücken
DEC06	N
DED21	Y	DE009M	Dresden
DED2C	Y	DE009M	Dresden
DED2D	Y	DE074M	Görlitz
DED2E	Y	DE009M	Dresden
DED2F	Y	DE009M	Dresden
DED41	N
DED42	N
DED43	N
DED44	N
DED45	Y	DE544M	Zwickau
DED51	Y	DE008M	Leipzig
DED52	Y	DE008M	Leipzig
DED53	Y	DE008M	Leipzig
DEE01	N
DEE02	Y	DE018M	Halle an der Saale
DEE03	Y	DE019M	Magdeburg
DEE04	N
DEE05	N
DEE06	Y	DE019M	Magdeburg
DEE07	Y	DE019M	Magdeburg
DEE08	N
DEE09	N
DEE0A	N
DEE0B	Y	DE018M	Halle an der Saale
DEE0C	N
DEE0D	N
DEE0E	N
DEF01	Y	DE052M	Flensburg
DEF02	Y	DE039M	Kiel
DEF03	Y	DE510M	Lübeck
DEF04	N
DEF05	N
DEF06	Y	DE002M	Hamburg
DEF07	N
DEF08	Y	DE510M	Lübeck
DEF09	Y	DE002M	Hamburg
DEF0A	Y	DE039M	Kiel
DEF0B	Y	DE039M	Kiel
DEF0C	Y	DE052M	Flensburg
DEF0D	Y	DE002M	Hamburg
DEF0E	N
DEF0F	Y	DE002M	Hamburg
DEG01	Y	DE032M	Erfurt
DEG02	N
DEG03	N
DEG04	N
DEG05	N
DEG06	N
DEG07	N
DEG09	N
DEG0A	N
DEG0B	N
DEG0C	Y	DE032M	Erfurt
DEG0D	Y	DE032M	Erfurt
DEG0E	N
DEG0F	Y	DE032M	Erfurt
DEG0G	N
DEG0H	N
DEG0I	N
DEG0J	N
DEG0K	N
DEG0L	N
DEG0M	N
DEG0N	N
DEG0P	N
DK011	Y	DK001MC	København
DK012	Y	DK001MC	København
DK013	Y	DK001MC	København
DK014	N
DK021	Y	DK001MC	København
DK022	N
DK031	Y	DK003M	Odense
DK032	N
DK041	N
DK042	Y	DK002M	Århus
DK050	Y	DK004M	Aalborg
EE001	Y	EE001MC	Tallinn
EE004	N
EE008	N
EE009	N
EE00A	N
EL301	Y	EL001MC	Athina
EL302	Y	EL001MC	Athina
EL303	Y	EL001MC	Athina
EL304	Y	EL001MC	Athina
EL305	Y	EL001MC	Athina
EL306	N
EL307	Y	EL001MC	Athina
EL411	N
EL412	N
EL413	N
EL421	N
EL422	N
EL431	N
EL432	N
EL433	N
EL434	N
EL511	N
EL512	N
EL513	N
EL514	N
EL515	N
EL521	N
EL522	Y	EL002M	Thessaloniki
EL523	N
EL524	N
EL525	N
EL526	N
EL527	N
EL531	N
EL532	N
EL533	N
EL541	N
EL542	N
EL543	N
EL611	N
EL612	N
EL613	N
EL621	N
EL622	N
EL623	N
EL624	N
EL631	N
EL632	N
EL633	N
EL641	N
EL642	N
EL643	N
EL644	N
EL645	N
EL651	N
EL652	N
EL653	N
ES111	Y	ES026M	A Coruña
ES112	N
ES113	N
ES114	Y	ES022M	Vigo
ES120	Y	ES013M	Oviedo - Gijón
ES130	Y	ES015M	Santander
ES211	Y	ES012M	Vitoria/Gasteiz
ES212	Y	ES510M	Guipúzcoa
ES213	Y	ES019M	Bilbao
ES220	Y	ES014M	Pamplona/Iruña
ES230	N
ES241	N
ES242	N
ES243	Y	ES005M	Zaragoza
ES300	Y	ES001MC	Madrid
ES411	N
ES412	N
ES413	N
ES414	N
ES415	N
ES416	N
ES417	N
ES418	Y	ES009M	Valladolid
ES419	N
ES421	N
ES422	N
ES423	N
ES424	N
ES425	N
ES431	N
ES432	N
ES511	Y	ES002M	Barcelona
ES512	N
ES513	N
ES514	N
ES521	Y	ES021M	Alicante/Alacant - Elche/Elx
ES522	N
ES523	Y	ES003M	Valencia
ES531	N
ES532	Y	ES010M	Palma de Mallorca
ES533	N
ES611	N
ES612	Y	ES522M	Cádiz
ES613	Y	ES020M	Córdoba
ES614	Y	ES501M	Granada
ES615	N
ES616	N
ES617	Y	ES006M	Málaga - Marbella
ES618	Y	ES004M	Sevilla
ES620	Y	ES007M	Murcia - Cartagena
ES630	N
ES640	N
ES703	N
ES704	N
ES705	Y	ES008M	Las Palmas
ES706	N
ES707	N
ES708	N
ES709	Y	ES025M	Santa Cruz de Tenerife
FI193	N
FI194	N
FI195	N
FI196	N
FI197	Y	FI002M	Tampere
FI1B1	Y	FI001MC	Helsinki
FI1C1	Y	FI003M	Turku
FI1C2	N
FI1C3	N
FI1C4	N
FI1C5	N
FI1D1	N
FI1D2	N
FI1D3	N
FI1D5	N
FI1D7	N
FI1D8	N
FI1D9	N
FI200	N
FR101	Y	FR001MC	Paris
FR102	Y	FR001MC	Paris
FR103	Y	FR001MC	Paris
FR104	Y	FR001MC	Paris
FR105	Y	FR001MC	Paris
FR106	Y	FR001MC	Paris
FR107	Y	FR001MC	Paris
FR108	Y	FR001MC	Paris
FRB01	N
FRB02	N
FRB03	N
FRB04	Y	FR035M	Tours
FRB05	N
FRB06	Y	FR019M	Orléans
FRC11	Y	FR020M	Dijon
FRC12	N
FRC13	N
FRC14	N
FRC21	Y	FR025M	Besanþon
FRC22	N
FRC23	N
FRC24	N
FRD11	Y	FR023M	Caen
FRD12	N
FRD13	N
FRD21	N
FRD22	Y	FR015M	Rouen - Le Havre
FRE11	Y	FR009M	Lille - Dunkerque - Valenciennes
FRE12	N
FRE21	N
FRE22	N
FRE23	Y	FR014M	Amiens
FRF11	Y	FR006M	Strasbourg
FRF12	Y	FR040M	Mulhouse
FRF21	N
FRF22	N
FRF23	Y	FR018M	Reims
FRF24	N
FRF31	Y	FR016M	Nancy
FRF32	N
FRF33	N
FRF34	N
FRG01	Y	FR008M	Nantes
FRG02	Y	FR036M	Angers
FRG03	N
FRG04	Y	FR038M	Le Mans
FRG05	N
FRH01	N
FRH02	Y	FR037M	Brest
FRH03	Y	FR013M	Rennes
FRH04	N
FRI11	N
FRI12	Y	FR007M	Bordeaux
FRI13	N
FRI14	N
FRI15	Y	FR045M	Pau
FRI21	N
FRI22	N
FRI23	Y	FR024M	Limoges
FRI31	N
FRI32	N
FRI33	N
FRI34	Y	FR021M	Poitiers
FRJ11	N
FRJ12	Y	FR044M	Nimes
FRJ13	Y	FR010M	Montpellier
FRJ14	N
FRJ15	Y	FR043M	Perpignan
FRJ21	N
FRJ22	N
FRJ23	Y	FR004M	Toulouse
FRJ24	N
FRJ25	N
FRJ26	N
FRJ27	N
FRJ28	N
FRK11	N
FRK12	N
FRK13	N
FRK14	Y	FR022M	Clermont-Ferrand
FRK21	N
FRK22	N
FRK23	N
FRK24	Y	FR026M	Grenoble
FRK25	Y	FR011M	Saint-Etienne
FRK26	Y	FR003M	Lyon
FRK27	N
FRK28	Y	FR048M	Annecy (FR)/Genève (CH)
FRL01	N
FRL02	N
FRL03	Y	FR205M	Nice
FRL04	Y	FR203M	Marseille
FRL05	Y	FR203M	Marseille
FRL06	N
FRM01	N
FRM02	N
FRY10	Y	FR520M	Guadeloupe
FRY20	Y	FR030M	Fort-de-France
FRY30	N
FRY40	N
FRY50	N
HR021	N
HR022	N
HR023	N
HR024	N
HR025	N
HR026	N
HR027	N
HR028	N
HR031	N
HR032	N
HR033	N
HR034	N
HR035	Y	HR005M	Split
HR036	N
HR037	N
HR050	Y	HR001MC	Grad Zagreb
HR061	N
HR062	N
HR063	N
HR064	Y	HR001MC	Grad Zagreb
HR065	Y	HR001MC	Grad Zagreb
HU110	Y	HU001MC	Budapest
HU120	Y	HU001MC	Budapest
HU211	Y	HU009M	Székesfehérvár
HU212	N
HU213	N
HU221	N
HU222	N
HU223	N
HU231	Y	HU004M	Pécs
HU232	N
HU233	N
HU311	Y	HU002M	Miskolc
HU312	N
HU313	N
HU321	Y	HU005M	Debrecen
HU322	N
HU323	N
HU331	N
HU332	N
HU333	N
IE041	N
IE042	N
IE051	N
IE052	N
IE053	Y	IE002M	Cork
IE061	Y	IE001MC	Dublin
IE062	Y	IE001MC	Dublin
IE063	N
IS001	N
IS002	N
ITC11	Y	IT004M	Torino
ITC12	N
ITC13	N
ITC14	N
ITC15	N
ITC16	N
ITC17	N
ITC18	N
ITC20	N
ITC31	N
ITC32	N
ITC33	Y	IT006M	Genova
ITC34	N
ITC41	N
ITC42	N
ITC43	N
ITC44	N
ITC46	Y	IT511M	Bergamo
ITC47	Y	IT029M	Brescia
ITC48	N
ITC49	Y	IT002M	Milano
ITC4A	N
ITC4B	N
ITC4C	Y	IT002M	Milano
ITC4D	Y	IT002M	Milano
ITF11	N
ITF12	N
ITF13	N
ITF14	N
ITF21	N
ITF22	N
ITF31	N
ITF32	N
ITF33	Y	IT003M	Napoli
ITF34	N
ITF35	N
ITF43	Y	IT022M	Taranto
ITF44	N
ITF45	N
ITF46	N
ITF47	Y	IT008M	Bari
ITF48	N
ITF51	N
ITF52	N
ITF61	N
ITF62	N
ITF63	N
ITF64	N
ITF65	N
ITG11	N
ITG12	Y	IT005M	Palermo
ITG13	Y	IT501M	Messina
ITG14	N
ITG15	N
ITG16	N
ITG17	Y	IT010M	Catania
ITG18	N
ITG19	N
ITG2D	N
ITG2E	N
ITG2F	Y	IT027M	Cagliari
ITG2G	N
ITG2H	N
ITH10	N
ITH20	N
ITH31	Y	IT012M	Verona
ITH32	N
ITH33	N
ITH34	N
ITH35	Y	IT011M	Venezia
ITH36	Y	IT028M	Padova
ITH37	N
ITH41	N
ITH42	N
ITH43	N
ITH44	N
ITH51	N
ITH52	Y	IT503M	Parma
ITH53	Y	IT505M	Reggio nell'Emilia
ITH54	N
ITH55	Y	IT009M	Bologna
ITH56	N
ITH57	N
ITH58	N
ITH59	N
ITI11	N
ITI12	N
ITI13	N
ITI14	Y	IT007M	Firenze
ITI15	Y	IT502M	Prato
ITI16	N
ITI17	N
ITI18	N
ITI19	N
ITI1A	N
ITI21	Y	IT016M	Perugia
ITI22	N
ITI31	N
ITI32	N
ITI33	N
ITI34	N
ITI35	N
ITI41	N
ITI42	N
ITI43	Y	IT001MC	Roma
ITI44	N
ITI45	N
LI000	N
LT011	Y	LT001MC	Vilnius
LT021	N
LT022	Y	LT002M	Kaunas
LT023	N
LT024	N
LT025	N
LT026	N
LT027	N
LT028	N
LT029	N
LU000	Y	LU001MC	Luxembourg
LV003	N
LV005	N
LV006	Y	LV001MC	Riga
LV007	Y	LV001MC	Riga
LV008	N
LV009	N
ME000	N
MK001	N
MK002	N
MK003	N
MK004	N
MK005	N
MK006	N
MK007	N
MK008	N
MT001	Y	MT001MC	Valletta
MT002	N
NL111	N
NL112	Y	NL007M	Groningen
NL113	Y	NL007M	Groningen
NL124	Y	NL015M	Leeuwarden
NL125	N
NL126	N
NL131	N
NL132	N
NL133	N
NL211	Y	NL511M	Zwolle
NL212	N
NL213	Y	NL008M	Enschede
NL221	N
NL224	N
NL225	N
NL226	Y	NL009M	Arnhem - Nijmegen
NL230	Y	NL002MC	Amsterdam
NL310	Y	NL004M	Utrecht
NL321	Y	NL002MC	Amsterdam
NL323	Y	NL002MC	Amsterdam
NL324	Y	NL002MC	Amsterdam
NL325	Y	NL002MC	Amsterdam
NL327	Y	NL002MC	Amsterdam
NL328	Y	NL002MC	Amsterdam
NL329	Y	NL002MC	Amsterdam
NL332	Y	NL001M	s' Gravenhage
NL333	Y	NL001M	s' Gravenhage
NL337	Y	NL507M	Leiden
NL33A	Y	NL003M	Rotterdam
NL33B	N
NL33C	Y	NL003M	Rotterdam
NL341	N
NL342	N
NL411	Y	NL012M	Breda
NL412	Y	NL006M	Tilburg
NL413	N
NL414	Y	NL005M	Eindhoven
NL421	N
NL422	N
NL423	N
NO020	N
NO060	Y	NO003M	Trøndelag
NO071	N
NO074	N
NO081	Y	NO001MC	Oslo
NO082	N
NO091	N
NO092	N
NO0A1	Y	NO002M	Bergen
NO0A2	N
NO0A3	N
NO0B1	N
NO0B2	N
PL213	Y	PL003M	Kraków
PL214	Y	PL003M	Kraków
PL217	Y	PL514M	Tarnów
PL218	N
PL219	N
PL21A	N
PL224	Y	PL024M	Czestochowa
PL225	Y	PL506M	Bielsko-Biala
PL227	N
PL228	Y	PL010M	Katowice
PL229	Y	PL010M	Katowice
PL22A	Y	PL010M	Katowice
PL22B	Y	PL010M	Katowice
PL22C	Y	PL010M	Katowice
PL411	N
PL414	N
PL415	Y	PL005M	Poznan
PL416	N
PL417	N
PL418	Y	PL005M	Poznan
PL424	Y	PL007M	Szczecin
PL426	N
PL427	N
PL428	N
PL431	N
PL432	N
PL514	Y	PL004M	Wroclaw
PL515	N
PL516	N
PL517	N
PL518	N
PL523	N
PL524	Y	PL016M	Opole
PL613	Y	PL008M	Bydgoszcz - Torún
PL616	N
PL617	N
PL618	N
PL619	N
PL621	N
PL622	Y	PL014M	Olsztyn
PL623	N
PL633	Y	PL006M	Gdansk
PL634	Y	PL006M	Gdansk
PL636	N
PL637	N
PL638	N
PL711	Y	PL002M	Lódz
PL712	Y	PL002M	Lódz
PL713	N
PL714	N
PL715	N
PL721	Y	PL012M	Kielce
PL722	N
PL811	N
PL812	N
PL814	Y	PL009M	Lublin
PL815	N
PL821	N
PL822	N
PL823	Y	PL015M	Rzeszów
PL824	N
PL841	Y	PL011M	Bialystok
PL842	N
PL843	N
PL911	Y	PL001MC	Warszawa
PL912	Y	PL001MC	Warszawa
PL913	Y	PL001MC	Warszawa
PL921	Y	PL025M	Radom
PL922	N
PL923	N
PL924	N
PL925	N
PL926	N
PT111	N
PT112	N
PT119	N
PT11A	Y	PT002M	Porto
PT11B	N
PT11C	N
PT11D	N
PT11E	N
PT150	N
PT16B	N
PT16D	N
PT16E	Y	PT005M	Coimbra
PT16F	N
PT16G	N
PT16H	N
PT16I	N
PT16J	N
PT170	Y	PT001MC	Lisboa
PT181	N
PT184	N
PT185	N
PT186	N
PT187	N
PT200	N
PT300	N
RO111	N
RO112	N
RO113	Y	RO002M	Cluj-Napoca
RO114	N
RO115	N
RO116	N
RO121	N
RO122	Y	RO504M	Brasov
RO123	N
RO124	N
RO125	N
RO126	N
RO211	N
RO212	N
RO213	Y	RO502M	Iasi
RO214	N
RO215	N
RO216	N
RO221	N
RO222	N
RO223	Y	RO501M	Constanta
RO224	Y	RO503M	Galati
RO225	N
RO226	N
RO311	N
RO312	N
RO313	N
RO314	N
RO315	N
RO316	Y	RO505M	Ploieşti
RO317	N
RO321	Y	RO001MC	Bucuresti
RO322	Y	RO001MC	Bucuresti
RO411	Y	RO004M	Craiova
RO412	N
RO413	N
RO414	N
RO415	N
RO421	N
RO422	N
RO423	N
RO424	Y	RO003M	Timisoara
RS110	N
RS121	N
RS122	N
RS123	N
RS124	N
RS125	N
RS126	N
RS127	N
RS211	N
RS212	N
RS213	N
RS214	N
RS215	N
RS216	N
RS217	N
RS218	N
RS221	N
RS222	N
RS223	N
RS224	N
RS225	N
RS226	N
RS227	N
RS228	N
RS229	N
SE110	Y	SE001MC	Stockholm
SE121	Y	SE006M	Uppsala
SE122	N
SE123	N
SE124	N
SE125	N
SE211	N
SE212	N
SE213	N
SE214	N
SE221	N
SE224	Y	SE003M	Malmö
SE231	N
SE232	Y	SE002M	Göteborg
SE311	N
SE312	N
SE313	N
SE321	N
SE322	N
SE331	N
SE332	N
SI031	N
SI032	Y	SI002M	Maribor
SI033	N
SI034	N
SI035	N
SI036	N
SI037	N
SI038	N
SI041	Y	SI001MC	Ljubljana
SI042	N
SI043	N
SI044	N
SK010	Y	SK001MC	Bratislava
SK021	N
SK022	N
SK023	N
SK031	N
SK032	N
SK041	N
SK042	Y	SK002M	KoÜice
TR100	N
TR211	N
TR212	N
TR213	N
TR221	N
TR222	N
TR310	N
TR321	N
TR322	N
TR323	N
TR331	N
TR332	N
TR333	N
TR334	N
TR411	N
TR412	N
TR413	N
TR421	N
TR422	N
TR423	N
TR424	N
TR425	N
TR510	N
TR521	N
TR522	N
TR611	N
TR612	N
TR613	N
TR621	N
TR622	N
TR631	N
TR632	N
TR633	N
TR711	N
TR712	N
TR713	N
TR714	N
TR715	N
TR721	N
TR722	N
TR723	N
TR811	N
TR812	N
TR813	N
TR821	N
TR822	N
TR823	N
TR831	N
TR832	N
TR833	N
TR834	N
TR901	N
TR902	N
TR903	N
TR904	N
TR905	N
TR906	N
TRA11	N
TRA12	N
TRA13	N
TRA21	N
TRA22	N
TRA23	N
TRA24	N
TRB11	N
TRB12	N
TRB13	N
TRB14	N
TRB21	N
TRB22	N
TRB23	N
TRB24	N
TRC11	N
TRC12	N
TRC13	N
TRC21	N
TRC22	N
TRC31	N
TRC32	N
TRC33	N
TRC34	N
UKC11	Y	UK559M	Middlesbrough
UKC12	Y	UK559M	Middlesbrough
UKC13	N
UKC14	N
UKC21	Y	UK013M	Newcastle upon Tyne
UKC22	Y	UK013M	Newcastle upon Tyne
UKC23	Y	UK510M	Sunderland
UKD11	N
UKD12	N
UKD33	Y	UK008M	Manchester
UKD34	Y	UK008M	Manchester
UKD35	Y	UK008M	Manchester
UKD36	Y	UK008M	Manchester
UKD37	Y	UK008M	Manchester
UKD41	Y	UK553M	Blackburn - Blackpool - Preston
UKD42	Y	UK553M	Blackburn - Blackpool - Preston
UKD44	N
UKD45	Y	UK553M	Blackburn - Blackpool - Preston
UKD46	N
UKD47	Y	UK006M	Liverpool
UKD61	N
UKD62	Y	UK008M	Manchester
UKD63	Y	UK568M	Cheshire West and Chester
UKD71	Y	UK006M	Liverpool
UKD72	Y	UK006M	Liverpool
UKD73	Y	UK006M	Liverpool
UKD74	Y	UK006M	Liverpool
UKE11	Y	UK026M	Kingston upon Hull
UKE12	Y	UK026M	Kingston upon Hull
UKE13	N
UKE21	N
UKE22	Y	UK003M	Leeds
UKE31	Y	UK506M	Doncaster
UKE32	Y	UK010M	Sheffield
UKE41	Y	UK005M	Bradford
UKE42	Y	UK003M	Leeds
UKE44	Y	UK501M	Kirklees
UKE45	Y	UK003M	Leeds
UKF11	Y	UK518M	Derby
UKF12	N
UKF13	Y	UK008M	Manchester
UKF14	Y	UK029M	Nottingham
UKF15	N
UKF16	Y	UK014M	Leicester
UKF21	Y	UK014M	Leicester
UKF22	Y	UK014M	Leicester
UKF24	Y	UK528M	Northampton
UKF25	N
UKF30	Y	UK019M	Lincolnshire
UKG11	N
UKG12	N
UKG13	Y	UK025M	Coventry
UKG21	N
UKG22	N
UKG23	Y	UK027M	Stoke-on-Trent
UKG24	Y	UK027M	Stoke-on-Trent
UKG31	Y	UK002M	West Midlands urban area
UKG32	Y	UK002M	West Midlands urban area
UKG33	Y	UK025M	Coventry
UKG36	Y	UK002M	West Midlands urban area
UKG37	Y	UK002M	West Midlands urban area
UKG38	Y	UK002M	West Midlands urban area
UKG39	Y	UK002M	West Midlands urban area
UKH11	N
UKH12	Y	UK017M	Cambridge
UKH14	Y	UK569M	Ipswich
UKH15	Y	UK566M	Norwich
UKH16	N
UKH17	N
UKH21	N
UKH23	Y	UK001MC	London
UKH24	N
UKH25	N
UKH31	Y	UK001MC	London
UKH32	Y	UK001MC	London
UKH34	Y	UK546M	Colchester
UKH35	Y	UK001MC	London
UKH36	Y	UK001MC	London
UKH37	Y	UK001MC	London
UKI31	Y	UK001MC	London
UKI32	Y	UK001MC	London
UKI33	Y	UK001MC	London
UKI34	Y	UK001MC	London
UKI41	Y	UK001MC	London
UKI42	Y	UK001MC	London
UKI43	Y	UK001MC	London
UKI44	Y	UK001MC	London
UKI45	Y	UK001MC	London
UKI51	Y	UK001MC	London
UKI52	Y	UK001MC	London
UKI53	Y	UK001MC	London
UKI54	Y	UK001MC	London
UKI61	Y	UK001MC	London
UKI62	Y	UK001MC	London
UKI63	Y	UK001MC	London
UKI71	Y	UK001MC	London
UKI72	Y	UK001MC	London
UKI73	Y	UK001MC	London
UKI74	Y	UK001MC	London
UKI75	Y	UK001MC	London
UKJ11	Y	UK001MC	London
UKJ12	Y	UK561M	Milton Keynes
UKJ13	N
UKJ14	Y	UK560M	Oxford
UKJ21	Y	UK515M	Brighton and Hove
UKJ22	N
UKJ25	Y	UK001MC	London
UKJ26	Y	UK001MC	London
UKJ27	N
UKJ28	N
UKJ31	Y	UK023M	Portsmouth
UKJ32	Y	UK520M	Southampton
UKJ34	N
UKJ35	Y	UK023M	Portsmouth
UKJ36	Y	UK520M	Southampton
UKJ37	N
UKJ41	Y	UK513M	Medway
UKJ43	Y	UK001MC	London
UKJ44	N
UKJ45	N
UKJ46	Y	UK001MC	London
UKK11	Y	UK011M	Bristol
UKK12	Y	UK011M	Bristol
UKK13	N
UKK14	N
UKK15	N
UKK23	N
UKK24	Y	UK539M	Bournemouth
UKK25	N
UKK30	N
UKK41	Y	UK516M	Plymouth
UKK42	N
UKK43	Y	UK018M	Exeter
UKL11	N
UKL12	N
UKL13	N
UKL14	N
UKL15	Y	UK009M	Cardiff
UKL16	Y	UK009M	Cardiff
UKL17	Y	UK517M	Swansea
UKL18	Y	UK517M	Swansea
UKL21	N
UKL22	Y	UK009M	Cardiff
UKL23	Y	UK568M	Cheshire West and Chester
UKL24	N
UKM50	Y	UK016M	Aberdeen
UKM61	N
UKM62	N
UKM63	N
UKM64	N
UKM65	N
UKM66	N
UKM71	Y	UK006M	Liverpool
UKM72	N
UKM73	Y	UK007M	Edinburgh
UKM75	Y	UK007M	Edinburgh
UKM76	N
UKM77	N
UKM78	Y	UK007M	Edinburgh
UKM81	Y	UK004M	Glasgow
UKM82	Y	UK004M	Glasgow
UKM83	Y	UK004M	Glasgow
UKM84	Y	UK004M	Glasgow
UKM91	N
UKM92	N
UKM93	N
UKM94	N
UKM95	Y	UK004M	Glasgow
UKN06	Y	UK012M	Belfast
UKN07	N
UKN08	N
UKN09	Y	UK012M	Belfast
UKN0A	N
UKN0B	N
UKN0C	N
UKN0D	Y	UK012M	Belfast
UKN0E	Y	UK012M	Belfast
UKN0F	N
UKN0G	N

## Sheet: Coastal regions
NUTS_ID	COASTAL CATEGORY	COASTAL LABEL			COASTAL REGIONS
AL011	0	non-coastal
AL012	1	coastal (on coast)			CATEGORY CODE	CATEGORY LABEL
AL013	0	non-coastal			0	non-coastal
AL014	1	coastal (on coast)			1	coastal (on coast)
AL015	1	coastal (on coast)			2	coastal (>= 50% of population living within 50km of the coastline)
AL021	2	coastal (>= 50% of population living within 50km of the coastline)
AL022	1	coastal (on coast)
AL031	2	coastal (>= 50% of population living within 50km of the coastline)
AL032	1	coastal (on coast)
AL033	2	coastal (>= 50% of population living within 50km of the coastline)
AL034	0	non-coastal
AL035	1	coastal (on coast)
AT111	0	non-coastal
AT112	0	non-coastal
AT113	0	non-coastal
AT121	0	non-coastal
AT122	0	non-coastal
AT123	0	non-coastal
AT124	0	non-coastal
AT125	0	non-coastal
AT126	0	non-coastal
AT127	0	non-coastal
AT130	0	non-coastal
AT211	0	non-coastal
AT212	0	non-coastal
AT213	0	non-coastal
AT221	0	non-coastal
AT222	0	non-coastal
AT223	0	non-coastal
AT224	0	non-coastal
AT225	0	non-coastal
AT226	0	non-coastal
AT311	0	non-coastal
AT312	0	non-coastal
AT313	0	non-coastal
AT314	0	non-coastal
AT315	0	non-coastal
AT321	0	non-coastal
AT322	0	non-coastal
AT323	0	non-coastal
AT331	0	non-coastal
AT332	0	non-coastal
AT333	0	non-coastal
AT334	0	non-coastal
AT335	0	non-coastal
AT341	0	non-coastal
AT342	0	non-coastal
BE100	0	non-coastal
BE211	1	coastal (on coast)
BE212	2	coastal (>= 50% of population living within 50km of the coastline)
BE213	0	non-coastal
BE223	0	non-coastal
BE224	0	non-coastal
BE225	0	non-coastal
BE231	2	coastal (>= 50% of population living within 50km of the coastline)
BE232	2	coastal (>= 50% of population living within 50km of the coastline)
BE233	2	coastal (>= 50% of population living within 50km of the coastline)
BE234	2	coastal (>= 50% of population living within 50km of the coastline)
BE235	0	non-coastal
BE236	1	coastal (on coast)
BE241	0	non-coastal
BE242	0	non-coastal
BE251	1	coastal (on coast)
BE252	2	coastal (>= 50% of population living within 50km of the coastline)
BE253	2	coastal (>= 50% of population living within 50km of the coastline)
BE254	0	non-coastal
BE255	1	coastal (on coast)
BE256	2	coastal (>= 50% of population living within 50km of the coastline)
BE257	2	coastal (>= 50% of population living within 50km of the coastline)
BE258	1	coastal (on coast)
BE310	0	non-coastal
BE323	0	non-coastal
BE328	0	non-coastal
BE329	0	non-coastal
BE32A	0	non-coastal
BE32B	0	non-coastal
BE32C	0	non-coastal
BE32D	0	non-coastal
BE331	0	non-coastal
BE332	0	non-coastal
BE334	0	non-coastal
BE335	0	non-coastal
BE336	0	non-coastal
BE341	0	non-coastal
BE342	0	non-coastal
BE343	0	non-coastal
BE344	0	non-coastal
BE345	0	non-coastal
BE351	0	non-coastal
BE352	0	non-coastal
BE353	0	non-coastal
BG311	0	non-coastal
BG312	0	non-coastal
BG313	0	non-coastal
BG314	0	non-coastal
BG315	0	non-coastal
BG321	0	non-coastal
BG322	0	non-coastal
BG323	0	non-coastal
BG324	0	non-coastal
BG325	0	non-coastal
BG331	1	coastal (on coast)
BG332	1	coastal (on coast)
BG333	0	non-coastal
BG334	0	non-coastal
BG341	1	coastal (on coast)
BG342	0	non-coastal
BG343	0	non-coastal
BG344	0	non-coastal
BG411	0	non-coastal
BG412	0	non-coastal
BG413	0	non-coastal
BG414	0	non-coastal
BG415	0	non-coastal
BG421	0	non-coastal
BG422	0	non-coastal
BG423	0	non-coastal
BG424	0	non-coastal
BG425	0	non-coastal
CH011	0	non-coastal
CH012	0	non-coastal
CH013	0	non-coastal
CH021	0	non-coastal
CH022	0	non-coastal
CH023	0	non-coastal
CH024	0	non-coastal
CH025	0	non-coastal
CH031	0	non-coastal
CH032	0	non-coastal
CH033	0	non-coastal
CH040	0	non-coastal
CH051	0	non-coastal
CH052	0	non-coastal
CH053	0	non-coastal
CH054	0	non-coastal
CH055	0	non-coastal
CH056	0	non-coastal
CH057	0	non-coastal
CH061	0	non-coastal
CH062	0	non-coastal
CH063	0	non-coastal
CH064	0	non-coastal
CH065	0	non-coastal
CH066	0	non-coastal
CH070	0	non-coastal
CY000	1	coastal (on coast)
CZ010	0	non-coastal
CZ020	0	non-coastal
CZ031	0	non-coastal
CZ032	0	non-coastal
CZ041	0	non-coastal
CZ042	0	non-coastal
CZ051	0	non-coastal
CZ052	0	non-coastal
CZ053	0	non-coastal
CZ063	0	non-coastal
CZ064	0	non-coastal
CZ071	0	non-coastal
CZ072	0	non-coastal
CZ080	0	non-coastal
DE111	0	non-coastal
DE112	0	non-coastal
DE113	0	non-coastal
DE114	0	non-coastal
DE115	0	non-coastal
DE116	0	non-coastal
DE117	0	non-coastal
DE118	0	non-coastal
DE119	0	non-coastal
DE11A	0	non-coastal
DE11B	0	non-coastal
DE11C	0	non-coastal
DE11D	0	non-coastal
DE121	0	non-coastal
DE122	0	non-coastal
DE123	0	non-coastal
DE124	0	non-coastal
DE125	0	non-coastal
DE126	0	non-coastal
DE127	0	non-coastal
DE128	0	non-coastal
DE129	0	non-coastal
DE12A	0	non-coastal
DE12B	0	non-coastal
DE12C	0	non-coastal
DE131	0	non-coastal
DE132	0	non-coastal
DE133	0	non-coastal
DE134	0	non-coastal
DE135	0	non-coastal
DE136	0	non-coastal
DE137	0	non-coastal
DE138	0	non-coastal
DE139	0	non-coastal
DE13A	0	non-coastal
DE141	0	non-coastal
DE142	0	non-coastal
DE143	0	non-coastal
DE144	0	non-coastal
DE145	0	non-coastal
DE146	0	non-coastal
DE147	0	non-coastal
DE148	0	non-coastal
DE149	0	non-coastal
DE211	0	non-coastal
DE212	0	non-coastal
DE213	0	non-coastal
DE214	0	non-coastal
DE215	0	non-coastal
DE216	0	non-coastal
DE217	0	non-coastal
DE218	0	non-coastal
DE219	0	non-coastal
DE21A	0	non-coastal
DE21B	0	non-coastal
DE21C	0	non-coastal
DE21D	0	non-coastal
DE21E	0	non-coastal
DE21F	0	non-coastal
DE21G	0	non-coastal
DE21H	0	non-coastal
DE21I	0	non-coastal
DE21J	0	non-coastal
DE21K	0	non-coastal
DE21L	0	non-coastal
DE21M	0	non-coastal
DE21N	0	non-coastal
DE221	0	non-coastal
DE222	0	non-coastal
DE223	0	non-coastal
DE224	0	non-coastal
DE225	0	non-coastal
DE226	0	non-coastal
DE227	0	non-coastal
DE228	0	non-coastal
DE229	0	non-coastal
DE22A	0	non-coastal
DE22B	0	non-coastal
DE22C	0	non-coastal
DE231	0	non-coastal
DE232	0	non-coastal
DE233	0	non-coastal
DE234	0	non-coastal
DE235	0	non-coastal
DE236	0	non-coastal
DE237	0	non-coastal
DE238	0	non-coastal
DE239	0	non-coastal
DE23A	0	non-coastal
DE241	0	non-coastal
DE242	0	non-coastal
DE243	0	non-coastal
DE244	0	non-coastal
DE245	0	non-coastal
DE246	0	non-coastal
DE247	0	non-coastal
DE248	0	non-coastal
DE249	0	non-coastal
DE24A	0	non-coastal
DE24B	0	non-coastal
DE24C	0	non-coastal
DE24D	0	non-coastal
DE251	0	non-coastal
DE252	0	non-coastal
DE253	0	non-coastal
DE254	0	non-coastal
DE255	0	non-coastal
DE256	0	non-coastal
DE257	0	non-coastal
DE258	0	non-coastal
DE259	0	non-coastal
DE25A	0	non-coastal
DE25B	0	non-coastal
DE25C	0	non-coastal
DE261	0	non-coastal
DE262	0	non-coastal
DE263	0	non-coastal
DE264	0	non-coastal
DE265	0	non-coastal
DE266	0	non-coastal
DE267	0	non-coastal
DE268	0	non-coastal
DE269	0	non-coastal
DE26A	0	non-coastal
DE26B	0	non-coastal
DE26C	0	non-coastal
DE271	0	non-coastal
DE272	0	non-coastal
DE273	0	non-coastal
DE274	0	non-coastal
DE275	0	non-coastal
DE276	0	non-coastal
DE277	0	non-coastal
DE278	0	non-coastal
DE279	0	non-coastal
DE27A	0	non-coastal
DE27B	0	non-coastal
DE27C	0	non-coastal
DE27D	0	non-coastal
DE27E	0	non-coastal
DE300	0	non-coastal
DE401	0	non-coastal
DE402	0	non-coastal
DE403	0	non-coastal
DE404	0	non-coastal
DE405	0	non-coastal
DE406	0	non-coastal
DE407	0	non-coastal
DE408	0	non-coastal
DE409	0	non-coastal
DE40A	0	non-coastal
DE40B	0	non-coastal
DE40C	0	non-coastal
DE40D	0	non-coastal
DE40E	0	non-coastal
DE40F	0	non-coastal
DE40G	0	non-coastal
DE40H	0	non-coastal
DE40I	0	non-coastal
DE501	1	coastal (on coast)
DE502	1	coastal (on coast)
DE600	1	coastal (on coast)
DE711	0	non-coastal
DE712	0	non-coastal
DE713	0	non-coastal
DE714	0	non-coastal
DE715	0	non-coastal
DE716	0	non-coastal
DE717	0	non-coastal
DE718	0	non-coastal
DE719	0	non-coastal
DE71A	0	non-coastal
DE71B	0	non-coastal
DE71C	0	non-coastal
DE71D	0	non-coastal
DE71E	0	non-coastal
DE721	0	non-coastal
DE722	0	non-coastal
DE723	0	non-coastal
DE724	0	non-coastal
DE725	0	non-coastal
DE731	0	non-coastal
DE732	0	non-coastal
DE733	0	non-coastal
DE734	0	non-coastal
DE735	0	non-coastal
DE736	0	non-coastal
DE737	0	non-coastal
DE803	1	coastal (on coast)
DE804	2	coastal (>= 50% of population living within 50km of the coastline)
DE80J	0	non-coastal
DE80K	1	coastal (on coast)
DE80L	1	coastal (on coast)
DE80M	1	coastal (on coast)
DE80N	1	coastal (on coast)
DE80O	0	non-coastal
DE911	0	non-coastal
DE912	0	non-coastal
DE913	0	non-coastal
DE914	0	non-coastal
DE916	0	non-coastal
DE917	0	non-coastal
DE918	0	non-coastal
DE91A	0	non-coastal
DE91B	0	non-coastal
DE91C	0	non-coastal
DE922	0	non-coastal
DE923	0	non-coastal
DE925	0	non-coastal
DE926	0	non-coastal
DE927	0	non-coastal
DE928	0	non-coastal
DE929	0	non-coastal
DE931	0	non-coastal
DE932	1	coastal (on coast)
DE933	0	non-coastal
DE934	0	non-coastal
DE935	0	non-coastal
DE936	2	coastal (>= 50% of population living within 50km of the coastline)
DE937	0	non-coastal
DE938	0	non-coastal
DE939	1	coastal (on coast)
DE93A	0	non-coastal
DE93B	0	non-coastal
DE941	2	coastal (>= 50% of population living within 50km of the coastline)
DE942	1	coastal (on coast)
DE943	2	coastal (>= 50% of population living within 50km of the coastline)
DE944	0	non-coastal
DE945	1	coastal (on coast)
DE946	2	coastal (>= 50% of population living within 50km of the coastline)
DE947	1	coastal (on coast)
DE948	0	non-coastal
DE949	0	non-coastal
DE94A	1	coastal (on coast)
DE94B	0	non-coastal
DE94C	1	coastal (on coast)
DE94D	2	coastal (>= 50% of population living within 50km of the coastline)
DE94E	0	non-coastal
DE94F	0	non-coastal
DE94G	1	coastal (on coast)
DE94H	1	coastal (on coast)
DEA11	0	non-coastal
DEA12	0	non-coastal
DEA13	0	non-coastal
DEA14	0	non-coastal
DEA15	0	non-coastal
DEA16	0	non-coastal
DEA17	0	non-coastal
DEA18	0	non-coastal
DEA19	0	non-coastal
DEA1A	0	non-coastal
DEA1B	0	non-coastal
DEA1C	0	non-coastal
DEA1D	0	non-coastal
DEA1E	0	non-coastal
DEA1F	0	non-coastal
DEA22	0	non-coastal
DEA23	0	non-coastal
DEA24	0	non-coastal
DEA26	0	non-coastal
DEA27	0	non-coastal
DEA28	0	non-coastal
DEA29	0	non-coastal
DEA2A	0	non-coastal
DEA2B	0	non-coastal
DEA2C	0	non-coastal
DEA2D	0	non-coastal
DEA31	0	non-coastal
DEA32	0	non-coastal
DEA33	0	non-coastal
DEA34	0	non-coastal
DEA35	0	non-coastal
DEA36	0	non-coastal
DEA37	0	non-coastal
DEA38	0	non-coastal
DEA41	0	non-coastal
DEA42	0	non-coastal
DEA43	0	non-coastal
DEA44	0	non-coastal
DEA45	0	non-coastal
DEA46	0	non-coastal
DEA47	0	non-coastal
DEA51	0	non-coastal
DEA52	0	non-coastal
DEA53	0	non-coastal
DEA54	0	non-coastal
DEA55	0	non-coastal
DEA56	0	non-coastal
DEA57	0	non-coastal
DEA58	0	non-coastal
DEA59	0	non-coastal
DEA5A	0	non-coastal
DEA5B	0	non-coastal
DEA5C	0	non-coastal
DEB11	0	non-coastal
DEB12	0	non-coastal
DEB13	0	non-coastal
DEB14	0	non-coastal
DEB15	0	non-coastal
DEB17	0	non-coastal
DEB18	0	non-coastal
DEB1A	0	non-coastal
DEB1B	0	non-coastal
DEB1C	0	non-coastal
DEB1D	0	non-coastal
DEB21	0	non-coastal
DEB22	0	non-coastal
DEB23	0	non-coastal
DEB24	0	non-coastal
DEB25	0	non-coastal
DEB31	0	non-coastal
DEB32	0	non-coastal
DEB33	0	non-coastal
DEB34	0	non-coastal
DEB35	0	non-coastal
DEB36	0	non-coastal
DEB37	0	non-coastal
DEB38	0	non-coastal
DEB39	0	non-coastal
DEB3A	0	non-coastal
DEB3B	0	non-coastal
DEB3C	0	non-coastal
DEB3D	0	non-coastal
DEB3E	0	non-coastal
DEB3F	0	non-coastal
DEB3G	0	non-coastal
DEB3H	0	non-coastal
DEB3I	0	non-coastal
DEB3J	0	non-coastal
DEB3K	0	non-coastal
DEC01	0	non-coastal
DEC02	0	non-coastal
DEC03	0	non-coastal
DEC04	0	non-coastal
DEC05	0	non-coastal
DEC06	0	non-coastal
DED21	0	non-coastal
DED2C	0	non-coastal
DED2D	0	non-coastal
DED2E	0	non-coastal
DED2F	0	non-coastal
DED41	0	non-coastal
DED42	0	non-coastal
DED43	0	non-coastal
DED44	0	non-coastal
DED45	0	non-coastal
DED51	0	non-coastal
DED52	0	non-coastal
DED53	0	non-coastal
DEE01	0	non-coastal
DEE02	0	non-coastal
DEE03	0	non-coastal
DEE04	0	non-coastal
DEE05	0	non-coastal
DEE06	0	non-coastal
DEE07	0	non-coastal
DEE08	0	non-coastal
DEE09	0	non-coastal
DEE0A	0	non-coastal
DEE0B	0	non-coastal
DEE0C	0	non-coastal
DEE0D	0	non-coastal
DEE0E	0	non-coastal
DEF01	1	coastal (on coast)
DEF02	1	coastal (on coast)
DEF03	1	coastal (on coast)
DEF04	2	coastal (>= 50% of population living within 50km of the coastline)
DEF05	1	coastal (on coast)
DEF06	0	non-coastal
DEF07	1	coastal (on coast)
DEF08	1	coastal (on coast)
DEF09	1	coastal (on coast)
DEF0A	1	coastal (on coast)
DEF0B	1	coastal (on coast)
DEF0C	1	coastal (on coast)
DEF0D	2	coastal (>= 50% of population living within 50km of the coastline)
DEF0E	1	coastal (on coast)
DEF0F	0	non-coastal
DEG01	0	non-coastal
DEG02	0	non-coastal
DEG03	0	non-coastal
DEG04	0	non-coastal
DEG05	0	non-coastal
DEG06	0	non-coastal
DEG07	0	non-coastal
DEG09	0	non-coastal
DEG0A	0	non-coastal
DEG0B	0	non-coastal
DEG0C	0	non-coastal
DEG0D	0	non-coastal
DEG0E	0	non-coastal
DEG0F	0	non-coastal
DEG0G	0	non-coastal
DEG0H	0	non-coastal
DEG0I	0	non-coastal
DEG0J	0	non-coastal
DEG0K	0	non-coastal
DEG0L	0	non-coastal
DEG0M	0	non-coastal
DEG0N	0	non-coastal
DEG0P	0	non-coastal
DK011	1	coastal (on coast)
DK012	1	coastal (on coast)
DK013	1	coastal (on coast)
DK014	1	coastal (on coast)
DK021	1	coastal (on coast)
DK022	1	coastal (on coast)
DK031	1	coastal (on coast)
DK032	1	coastal (on coast)
DK041	1	coastal (on coast)
DK042	1	coastal (on coast)
DK050	1	coastal (on coast)
EE001	1	coastal (on coast)
EE004	1	coastal (on coast)
EE008	0	non-coastal
EE009	1	coastal (on coast)
EE00A	1	coastal (on coast)
EL301	2	coastal (>= 50% of population living within 50km of the coastline)
EL302	1	coastal (on coast)
EL303	2	coastal (>= 50% of population living within 50km of the coastline)
EL304	1	coastal (on coast)
EL305	1	coastal (on coast)
EL306	1	coastal (on coast)
EL307	1	coastal (on coast)
EL411	1	coastal (on coast)
EL412	1	coastal (on coast)
EL413	1	coastal (on coast)
EL421	1	coastal (on coast)
EL422	1	coastal (on coast)
EL431	1	coastal (on coast)
EL432	1	coastal (on coast)
EL433	1	coastal (on coast)
EL434	1	coastal (on coast)
EL511	1	coastal (on coast)
EL512	1	coastal (on coast)
EL513	1	coastal (on coast)
EL514	2	coastal (>= 50% of population living within 50km of the coastline)
EL515	1	coastal (on coast)
EL521	1	coastal (on coast)
EL522	1	coastal (on coast)
EL523	2	coastal (>= 50% of population living within 50km of the coastline)
EL524	2	coastal (>= 50% of population living within 50km of the coastline)
EL525	1	coastal (on coast)
EL526	1	coastal (on coast)
EL527	1	coastal (on coast)
EL531	0	non-coastal
EL532	0	non-coastal
EL533	0	non-coastal
EL541	1	coastal (on coast)
EL542	1	coastal (on coast)
EL543	0	non-coastal
EL611	0	non-coastal
EL612	1	coastal (on coast)
EL613	1	coastal (on coast)
EL621	1	coastal (on coast)
EL622	1	coastal (on coast)
EL623	1	coastal (on coast)
EL624	1	coastal (on coast)
EL631	1	coastal (on coast)
EL632	1	coastal (on coast)
EL633	1	coastal (on coast)
EL641	1	coastal (on coast)
EL642	1	coastal (on coast)
EL643	2	coastal (>= 50% of population living within 50km of the coastline)
EL644	1	coastal (on coast)
EL645	1	coastal (on coast)
EL651	1	coastal (on coast)
EL652	1	coastal (on coast)
EL653	1	coastal (on coast)
ES111	1	coastal (on coast)
ES112	1	coastal (on coast)
ES113	0	non-coastal
ES114	1	coastal (on coast)
ES120	1	coastal (on coast)
ES130	1	coastal (on coast)
ES211	0	non-coastal
ES212	1	coastal (on coast)
ES213	1	coastal (on coast)
ES220	0	non-coastal
ES230	0	non-coastal
ES241	0	non-coastal
ES242	0	non-coastal
ES243	0	non-coastal
ES300	0	non-coastal
ES411	0	non-coastal
ES412	0	non-coastal
ES413	0	non-coastal
ES414	0	non-coastal
ES415	0	non-coastal
ES416	0	non-coastal
ES417	0	non-coastal
ES418	0	non-coastal
ES419	0	non-coastal
ES421	0	non-coastal
ES422	0	non-coastal
ES423	0	non-coastal
ES424	0	non-coastal
ES425	0	non-coastal
ES431	0	non-coastal
ES432	0	non-coastal
ES511	1	coastal (on coast)
ES512	1	coastal (on coast)
ES513	0	non-coastal
ES514	1	coastal (on coast)
ES521	1	coastal (on coast)
ES522	1	coastal (on coast)
ES523	1	coastal (on coast)
ES531	1	coastal (on coast)
ES532	1	coastal (on coast)
ES533	1	coastal (on coast)
ES611	1	coastal (on coast)
ES612	1	coastal (on coast)
ES613	0	non-coastal
ES614	1	coastal (on coast)
ES615	1	coastal (on coast)
ES616	0	non-coastal
ES617	1	coastal (on coast)
ES618	0	non-coastal
ES620	1	coastal (on coast)
ES630	1	coastal (on coast)
ES640	1	coastal (on coast)
ES703	1	coastal (on coast)
ES704	1	coastal (on coast)
ES705	1	coastal (on coast)
ES706	1	coastal (on coast)
ES707	1	coastal (on coast)
ES708	1	coastal (on coast)
ES709	1	coastal (on coast)
FI193	0	non-coastal
FI194	0	non-coastal
FI195	1	coastal (on coast)
FI196	1	coastal (on coast)
FI197	0	non-coastal
FI1B1	1	coastal (on coast)
FI1C1	1	coastal (on coast)
FI1C2	0	non-coastal
FI1C3	0	non-coastal
FI1C4	1	coastal (on coast)
FI1C5	0	non-coastal
FI1D1	0	non-coastal
FI1D2	0	non-coastal
FI1D3	0	non-coastal
FI1D5	1	coastal (on coast)
FI1D7	1	coastal (on coast)
FI1D8	0	non-coastal
FI1D9	1	coastal (on coast)
FI200	1	coastal (on coast)
FR101	0	non-coastal
FR102	0	non-coastal
FR103	0	non-coastal
FR104	0	non-coastal
FR105	0	non-coastal
FR106	0	non-coastal
FR107	0	non-coastal
FR108	0	non-coastal
FRB01	0	non-coastal
FRB02	0	non-coastal
FRB03	0	non-coastal
FRB04	0	non-coastal
FRB05	0	non-coastal
FRB06	0	non-coastal
FRC11	0	non-coastal
FRC12	0	non-coastal
FRC13	0	non-coastal
FRC14	0	non-coastal
FRC21	0	non-coastal
FRC22	0	non-coastal
FRC23	0	non-coastal
FRC24	0	non-coastal
FRD11	1	coastal (on coast)
FRD12	1	coastal (on coast)
FRD13	0	non-coastal
FRD21	1	coastal (on coast)
FRD22	1	coastal (on coast)
FRE11	1	coastal (on coast)
FRE12	1	coastal (on coast)
FRE21	0	non-coastal
FRE22	0	non-coastal
FRE23	1	coastal (on coast)
FRF11	0	non-coastal
FRF12	0	non-coastal
FRF21	0	non-coastal
FRF22	0	non-coastal
FRF23	0	non-coastal
FRF24	0	non-coastal
FRF31	0	non-coastal
FRF32	0	non-coastal
FRF33	0	non-coastal
FRF34	0	non-coastal
FRG01	1	coastal (on coast)
FRG02	0	non-coastal
FRG03	0	non-coastal
FRG04	0	non-coastal
FRG05	1	coastal (on coast)
FRH01	1	coastal (on coast)
FRH02	1	coastal (on coast)
FRH03	1	coastal (on coast)
FRH04	1	coastal (on coast)
FRI11	0	non-coastal
FRI12	1	coastal (on coast)
FRI13	1	coastal (on coast)
FRI14	0	non-coastal
FRI15	1	coastal (on coast)
FRI21	0	non-coastal
FRI22	0	non-coastal
FRI23	0	non-coastal
FRI31	0	non-coastal
FRI32	1	coastal (on coast)
FRI33	0	non-coastal
FRI34	0	non-coastal
FRJ11	1	coastal (on coast)
FRJ12	1	coastal (on coast)
FRJ13	1	coastal (on coast)
FRJ14	0	non-coastal
FRJ15	1	coastal (on coast)
FRJ21	0	non-coastal
FRJ22	0	non-coastal
FRJ23	0	non-coastal
FRJ24	0	non-coastal
FRJ25	0	non-coastal
FRJ26	0	non-coastal
FRJ27	0	non-coastal
FRJ28	0	non-coastal
FRK11	0	non-coastal
FRK12	0	non-coastal
FRK13	0	non-coastal
FRK14	0	non-coastal
FRK21	0	non-coastal
FRK22	0	non-coastal
FRK23	0	non-coastal
FRK24	0	non-coastal
FRK25	0	non-coastal
FRK26	0	non-coastal
FRK27	0	non-coastal
FRK28	0	non-coastal
FRL01	0	non-coastal
FRL02	0	non-coastal
FRL03	1	coastal (on coast)
FRL04	1	coastal (on coast)
FRL05	1	coastal (on coast)
FRL06	0	non-coastal
FRM01	1	coastal (on coast)
FRM02	1	coastal (on coast)
FRY10	1	coastal (on coast)
FRY20	1	coastal (on coast)
FRY30	1	coastal (on coast)
FRY40	1	coastal (on coast)
FRY50	1	coastal (on coast)
HR021	0	non-coastal
HR022	0	non-coastal
HR023	0	non-coastal
HR024	0	non-coastal
HR025	0	non-coastal
HR026	0	non-coastal
HR027	0	non-coastal
HR028	0	non-coastal
HR031	1	coastal (on coast)
HR032	1	coastal (on coast)
HR033	1	coastal (on coast)
HR034	1	coastal (on coast)
HR035	1	coastal (on coast)
HR036	1	coastal (on coast)
HR037	1	coastal (on coast)
HR050	0	non-coastal
HR061	0	non-coastal
HR062	0	non-coastal
HR063	0	non-coastal
HR064	0	non-coastal
HR065	0	non-coastal
HU110	0	non-coastal
HU120	0	non-coastal
HU211	0	non-coastal
HU212	0	non-coastal
HU213	0	non-coastal
HU221	0	non-coastal
HU222	0	non-coastal
HU223	0	non-coastal
HU231	0	non-coastal
HU232	0	non-coastal
HU233	0	non-coastal
HU311	0	non-coastal
HU312	0	non-coastal
HU313	0	non-coastal
HU321	0	non-coastal
HU322	0	non-coastal
HU323	0	non-coastal
HU331	0	non-coastal
HU332	0	non-coastal
HU333	0	non-coastal
IE041	1	coastal (on coast)
IE042	1	coastal (on coast)
IE051	1	coastal (on coast)
IE052	1	coastal (on coast)
IE053	1	coastal (on coast)
IE061	1	coastal (on coast)
IE062	1	coastal (on coast)
IE063	0	non-coastal
IS001	1	coastal (on coast)
IS002	1	coastal (on coast)
ITC11	0	non-coastal
ITC12	0	non-coastal
ITC13	0	non-coastal
ITC14	0	non-coastal
ITC15	0	non-coastal
ITC16	0	non-coastal
ITC17	0	non-coastal
ITC18	0	non-coastal
ITC20	0	non-coastal
ITC31	1	coastal (on coast)
ITC32	1	coastal (on coast)
ITC33	1	coastal (on coast)
ITC34	1	coastal (on coast)
ITC41	0	non-coastal
ITC42	0	non-coastal
ITC43	0	non-coastal
ITC44	0	non-coastal
ITC46	0	non-coastal
ITC47	0	non-coastal
ITC48	0	non-coastal
ITC49	0	non-coastal
ITC4A	0	non-coastal
ITC4B	0	non-coastal
ITC4C	0	non-coastal
ITC4D	0	non-coastal
ITF11	0	non-coastal
ITF12	1	coastal (on coast)
ITF13	1	coastal (on coast)
ITF14	1	coastal (on coast)
ITF21	0	non-coastal
ITF22	1	coastal (on coast)
ITF31	1	coastal (on coast)
ITF32	2	coastal (>= 50% of population living within 50km of the coastline)
ITF33	1	coastal (on coast)
ITF34	2	coastal (>= 50% of population living within 50km of the coastline)
ITF35	1	coastal (on coast)
ITF43	1	coastal (on coast)
ITF44	1	coastal (on coast)
ITF45	1	coastal (on coast)
ITF46	1	coastal (on coast)
ITF47	1	coastal (on coast)
ITF48	1	coastal (on coast)
ITF51	1	coastal (on coast)
ITF52	1	coastal (on coast)
ITF61	1	coastal (on coast)
ITF62	1	coastal (on coast)
ITF63	1	coastal (on coast)
ITF64	1	coastal (on coast)
ITF65	1	coastal (on coast)
ITG11	1	coastal (on coast)
ITG12	1	coastal (on coast)
ITG13	1	coastal (on coast)
ITG14	1	coastal (on coast)
ITG15	1	coastal (on coast)
ITG16	2	coastal (>= 50% of population living within 50km of the coastline)
ITG17	1	coastal (on coast)
ITG18	1	coastal (on coast)
ITG19	1	coastal (on coast)
ITG2D	1	coastal (on coast)
ITG2E	1	coastal (on coast)
ITG2F	1	coastal (on coast)
ITG2G	1	coastal (on coast)
ITG2H	1	coastal (on coast)
ITH10	0	non-coastal
ITH20	0	non-coastal
ITH31	0	non-coastal
ITH32	0	non-coastal
ITH33	0	non-coastal
ITH34	2	coastal (>= 50% of population living within 50km of the coastline)
ITH35	1	coastal (on coast)
ITH36	1	coastal (on coast)
ITH37	1	coastal (on coast)
ITH41	2	coastal (>= 50% of population living within 50km of the coastline)
ITH42	1	coastal (on coast)
ITH43	1	coastal (on coast)
ITH44	1	coastal (on coast)
ITH51	0	non-coastal
ITH52	0	non-coastal
ITH53	0	non-coastal
ITH54	0	non-coastal
ITH55	0	non-coastal
ITH56	1	coastal (on coast)
ITH57	1	coastal (on coast)
ITH58	1	coastal (on coast)
ITH59	1	coastal (on coast)
ITI11	1	coastal (on coast)
ITI12	1	coastal (on coast)
ITI13	0	non-coastal
ITI14	0	non-coastal
ITI15	0	non-coastal
ITI16	1	coastal (on coast)
ITI17	1	coastal (on coast)
ITI18	0	non-coastal
ITI19	0	non-coastal
ITI1A	1	coastal (on coast)
ITI21	0	non-coastal
ITI22	0	non-coastal
ITI31	1	coastal (on coast)
ITI32	1	coastal (on coast)
ITI33	1	coastal (on coast)
ITI34	1	coastal (on coast)
ITI35	1	coastal (on coast)
ITI41	1	coastal (on coast)
ITI42	0	non-coastal
ITI43	1	coastal (on coast)
ITI44	1	coastal (on coast)
ITI45	2	coastal (>= 50% of population living within 50km of the coastline)
LI000	0	non-coastal
LT011	0	non-coastal
LT021	0	non-coastal
LT022	0	non-coastal
LT023	1	coastal (on coast)
LT024	0	non-coastal
LT025	0	non-coastal
LT026	0	non-coastal
LT027	0	non-coastal
LT028	0	non-coastal
LT029	0	non-coastal
LU000	0	non-coastal
LV003	1	coastal (on coast)
LV005	0	non-coastal
LV006	1	coastal (on coast)
LV007	1	coastal (on coast)
LV008	0	non-coastal
LV009	0	non-coastal
ME000	1	coastal (on coast)
MK001	0	non-coastal
MK002	0	non-coastal
MK003	0	non-coastal
MK004	0	non-coastal
MK005	0	non-coastal
MK006	0	non-coastal
MK007	0	non-coastal
MK008	0	non-coastal
MT001	1	coastal (on coast)
MT002	1	coastal (on coast)
NL111	1	coastal (on coast)
NL112	1	coastal (on coast)
NL113	1	coastal (on coast)
NL124	1	coastal (on coast)
NL125	1	coastal (on coast)
NL126	2	coastal (>= 50% of population living within 50km of the coastline)
NL131	2	coastal (>= 50% of population living within 50km of the coastline)
NL132	0	non-coastal
NL133	0	non-coastal
NL211	0	non-coastal
NL212	0	non-coastal
NL213	0	non-coastal
NL221	0	non-coastal
NL224	0	non-coastal
NL225	0	non-coastal
NL226	0	non-coastal
NL230	2	coastal (>= 50% of population living within 50km of the coastline)
NL310	0	non-coastal
NL321	1	coastal (on coast)
NL323	1	coastal (on coast)
NL324	1	coastal (on coast)
NL325	2	coastal (>= 50% of population living within 50km of the coastline)
NL327	2	coastal (>= 50% of population living within 50km of the coastline)
NL328	1	coastal (on coast)
NL329	2	coastal (>= 50% of population living within 50km of the coastline)
NL332	1	coastal (on coast)
NL333	1	coastal (on coast)
NL337	1	coastal (on coast)
NL33A	2	coastal (>= 50% of population living within 50km of the coastline)
NL33B	2	coastal (>= 50% of population living within 50km of the coastline)
NL33C	1	coastal (on coast)
NL341	1	coastal (on coast)
NL342	1	coastal (on coast)
NL411	2	coastal (>= 50% of population living within 50km of the coastline)
NL412	0	non-coastal
NL413	0	non-coastal
NL414	0	non-coastal
NL421	0	non-coastal
NL422	0	non-coastal
NL423	0	non-coastal
NO020	0	non-coastal
NO060	1	coastal (on coast)
NO071	1	coastal (on coast)
NO074	1	coastal (on coast)
NO081	1	coastal (on coast)
NO082	1	coastal (on coast)
NO091	1	coastal (on coast)
NO092	1	coastal (on coast)
NO0A1	1	coastal (on coast)
NO0A2	1	coastal (on coast)
NO0A3	1	coastal (on coast)
NO0B1	2	coastal (>= 50% of population living within 50km of the coastline)
NO0B2	2	coastal (>= 50% of population living within 50km of the coastline)
PL213	0	non-coastal
PL214	0	non-coastal
PL217	0	non-coastal
PL218	0	non-coastal
PL219	0	non-coastal
PL21A	0	non-coastal
PL224	0	non-coastal
PL225	0	non-coastal
PL227	0	non-coastal
PL228	0	non-coastal
PL229	0	non-coastal
PL22A	0	non-coastal
PL22B	0	non-coastal
PL22C	0	non-coastal
PL411	0	non-coastal
PL414	0	non-coastal
PL415	0	non-coastal
PL416	0	non-coastal
PL417	0	non-coastal
PL418	0	non-coastal
PL424	2	coastal (>= 50% of population living within 50km of the coastline)
PL426	1	coastal (on coast)
PL427	0	non-coastal
PL428	1	coastal (on coast)
PL431	0	non-coastal
PL432	0	non-coastal
PL514	0	non-coastal
PL515	0	non-coastal
PL516	0	non-coastal
PL517	0	non-coastal
PL518	0	non-coastal
PL523	0	non-coastal
PL524	0	non-coastal
PL613	0	non-coastal
PL616	0	non-coastal
PL617	0	non-coastal
PL618	0	non-coastal
PL619	0	non-coastal
PL621	1	coastal (on coast)
PL622	0	non-coastal
PL623	0	non-coastal
PL633	1	coastal (on coast)
PL634	1	coastal (on coast)
PL636	1	coastal (on coast)
PL637	0	non-coastal
PL638	2	coastal (>= 50% of population living within 50km of the coastline)
PL711	0	non-coastal
PL712	0	non-coastal
PL713	0	non-coastal
PL714	0	non-coastal
PL715	0	non-coastal
PL721	0	non-coastal
PL722	0	non-coastal
PL811	0	non-coastal
PL812	0	non-coastal
PL814	0	non-coastal
PL815	0	non-coastal
PL821	0	non-coastal
PL822	0	non-coastal
PL823	0	non-coastal
PL824	0	non-coastal
PL841	0	non-coastal
PL842	0	non-coastal
PL843	0	non-coastal
PL911	0	non-coastal
PL912	0	non-coastal
PL913	0	non-coastal
PL921	0	non-coastal
PL922	0	non-coastal
PL923	0	non-coastal
PL924	0	non-coastal
PL925	0	non-coastal
PL926	0	non-coastal
PT111	1	coastal (on coast)
PT112	1	coastal (on coast)
PT119	2	coastal (>= 50% of population living within 50km of the coastline)
PT11A	1	coastal (on coast)
PT11B	0	non-coastal
PT11C	2	coastal (>= 50% of population living within 50km of the coastline)
PT11D	0	non-coastal
PT11E	0	non-coastal
PT150	1	coastal (on coast)
PT16B	1	coastal (on coast)
PT16D	1	coastal (on coast)
PT16E	1	coastal (on coast)
PT16F	1	coastal (on coast)
PT16G	0	non-coastal
PT16H	0	non-coastal
PT16I	0	non-coastal
PT16J	0	non-coastal
PT170	1	coastal (on coast)
PT181	1	coastal (on coast)
PT184	0	non-coastal
PT185	1	coastal (on coast)
PT186	0	non-coastal
PT187	0	non-coastal
PT200	1	coastal (on coast)
PT300	1	coastal (on coast)
RO111	0	non-coastal
RO112	0	non-coastal
RO113	0	non-coastal
RO114	0	non-coastal
RO115	0	non-coastal
RO116	0	non-coastal
RO121	0	non-coastal
RO122	0	non-coastal
RO123	0	non-coastal
RO124	0	non-coastal
RO125	0	non-coastal
RO126	0	non-coastal
RO211	0	non-coastal
RO212	0	non-coastal
RO213	0	non-coastal
RO214	0	non-coastal
RO215	0	non-coastal
RO216	0	non-coastal
RO221	0	non-coastal
RO222	0	non-coastal
RO223	1	coastal (on coast)
RO224	0	non-coastal
RO225	1	coastal (on coast)
RO226	0	non-coastal
RO311	0	non-coastal
RO312	0	non-coastal
RO313	0	non-coastal
RO314	0	non-coastal
RO315	0	non-coastal
RO316	0	non-coastal
RO317	0	non-coastal
RO321	0	non-coastal
RO322	0	non-coastal
RO411	0	non-coastal
RO412	0	non-coastal
RO413	0	non-coastal
RO414	0	non-coastal
RO415	0	non-coastal
RO421	0	non-coastal
RO422	0	non-coastal
RO423	0	non-coastal
RO424	0	non-coastal
RS110	0	non-coastal
RS121	0	non-coastal
RS122	0	non-coastal
RS123	0	non-coastal
RS124	0	non-coastal
RS125	0	non-coastal
RS126	0	non-coastal
RS127	0	non-coastal
RS211	0	non-coastal
RS212	0	non-coastal
RS213	0	non-coastal
RS214	0	non-coastal
RS215	0	non-coastal
RS216	0	non-coastal
RS217	0	non-coastal
RS218	0	non-coastal
RS221	0	non-coastal
RS222	0	non-coastal
RS223	0	non-coastal
RS224	0	non-coastal
RS225	0	non-coastal
RS226	0	non-coastal
RS227	0	non-coastal
RS228	0	non-coastal
RS229	0	non-coastal
SE110	1	coastal (on coast)
SE121	1	coastal (on coast)
SE122	1	coastal (on coast)
SE123	1	coastal (on coast)
SE124	0	non-coastal
SE125	0	non-coastal
SE211	0	non-coastal
SE212	0	non-coastal
SE213	1	coastal (on coast)
SE214	1	coastal (on coast)
SE221	1	coastal (on coast)
SE224	1	coastal (on coast)
SE231	1	coastal (on coast)
SE232	1	coastal (on coast)
SE311	0	non-coastal
SE312	0	non-coastal
SE313	1	coastal (on coast)
SE321	1	coastal (on coast)
SE322	0	non-coastal
SE331	1	coastal (on coast)
SE332	1	coastal (on coast)
SI031	0	non-coastal
SI032	0	non-coastal
SI033	0	non-coastal
SI034	0	non-coastal
SI035	0	non-coastal
SI036	0	non-coastal
SI037	0	non-coastal
SI038	2	coastal (>= 50% of population living within 50km of the coastline)
SI041	0	non-coastal
SI042	0	non-coastal
SI043	2	coastal (>= 50% of population living within 50km of the coastline)
SI044	1	coastal (on coast)
SK010	0	non-coastal
SK021	0	non-coastal
SK022	0	non-coastal
SK023	0	non-coastal
SK031	0	non-coastal
SK032	0	non-coastal
SK041	0	non-coastal
SK042	0	non-coastal
TR100	1	coastal (on coast)
TR211	1	coastal (on coast)
TR212	1	coastal (on coast)
TR213	1	coastal (on coast)
TR221	1	coastal (on coast)
TR222	1	coastal (on coast)
TR310	1	coastal (on coast)
TR321	1	coastal (on coast)
TR322	0	non-coastal
TR323	1	coastal (on coast)
TR331	0	non-coastal
TR332	0	non-coastal
TR333	0	non-coastal
TR334	0	non-coastal
TR411	1	coastal (on coast)
TR412	0	non-coastal
TR413	0	non-coastal
TR421	1	coastal (on coast)
TR422	1	coastal (on coast)
TR423	1	coastal (on coast)
TR424	0	non-coastal
TR425	1	coastal (on coast)
TR510	0	non-coastal
TR521	0	non-coastal
TR522	0	non-coastal
TR611	1	coastal (on coast)
TR612	0	non-coastal
TR613	0	non-coastal
TR621	1	coastal (on coast)
TR622	1	coastal (on coast)
TR631	1	coastal (on coast)
TR632	0	non-coastal
TR633	2	coastal (>= 50% of population living within 50km of the coastline)
TR711	0	non-coastal
TR712	0	non-coastal
TR713	0	non-coastal
TR714	0	non-coastal
TR715	0	non-coastal
TR721	0	non-coastal
TR722	0	non-coastal
TR723	0	non-coastal
TR811	1	coastal (on coast)
TR812	0	non-coastal
TR813	1	coastal (on coast)
TR821	1	coastal (on coast)
TR822	0	non-coastal
TR823	1	coastal (on coast)
TR831	1	coastal (on coast)
TR832	0	non-coastal
TR833	0	non-coastal
TR834	0	non-coastal
TR901	1	coastal (on coast)
TR902	1	coastal (on coast)
TR903	1	coastal (on coast)
TR904	1	coastal (on coast)
TR905	1	coastal (on coast)
TR906	0	non-coastal
TRA11	0	non-coastal
TRA12	0	non-coastal
TRA13	0	non-coastal
TRA21	0	non-coastal
TRA22	0	non-coastal
TRA23	0	non-coastal
TRA24	0	non-coastal
TRB11	0	non-coastal
TRB12	0	non-coastal
TRB13	0	non-coastal
TRB14	0	non-coastal
TRB21	0	non-coastal
TRB22	0	non-coastal
TRB23	0	non-coastal
TRB24	0	non-coastal
TRC11	0	non-coastal
TRC12	0	non-coastal
TRC13	2	coastal (>= 50% of population living within 50km of the coastline)
TRC21	0	non-coastal
TRC22	0	non-coastal
TRC31	0	non-coastal
TRC32	0	non-coastal
TRC33	0	non-coastal
TRC34	0	non-coastal
UKC11	1	coastal (on coast)
UKC12	1	coastal (on coast)
UKC13	2	coastal (>= 50% of population living within 50km of the coastline)
UKC14	1	coastal (on coast)
UKC21	1	coastal (on coast)
UKC22	1	coastal (on coast)
UKC23	1	coastal (on coast)
UKD11	1	coastal (on coast)
UKD12	1	coastal (on coast)
UKD33	2	coastal (>= 50% of population living within 50km of the coastline)
UKD34	2	coastal (>= 50% of population living within 50km of the coastline)
UKD35	2	coastal (>= 50% of population living within 50km of the coastline)
UKD36	2	coastal (>= 50% of population living within 50km of the coastline)
UKD37	2	coastal (>= 50% of population living within 50km of the coastline)
UKD41	2	coastal (>= 50% of population living within 50km of the coastline)
UKD42	1	coastal (on coast)
UKD44	1	coastal (on coast)
UKD45	1	coastal (on coast)
UKD46	2	coastal (>= 50% of population living within 50km of the coastline)
UKD47	1	coastal (on coast)
UKD61	1	coastal (on coast)
UKD62	2	coastal (>= 50% of population living within 50km of the coastline)
UKD63	1	coastal (on coast)
UKD71	1	coastal (on coast)
UKD72	1	coastal (on coast)
UKD73	1	coastal (on coast)
UKD74	1	coastal (on coast)
UKE11	1	coastal (on coast)
UKE12	1	coastal (on coast)
UKE13	1	coastal (on coast)
UKE21	2	coastal (>= 50% of population living within 50km of the coastline)
UKE22	1	coastal (on coast)
UKE31	2	coastal (>= 50% of population living within 50km of the coastline)
UKE32	2	coastal (>= 50% of population living within 50km of the coastline)
UKE41	0	non-coastal
UKE42	2	coastal (>= 50% of population living within 50km of the coastline)
UKE44	0	non-coastal
UKE45	2	coastal (>= 50% of population living within 50km of the coastline)
UKF11	0	non-coastal
UKF12	0	non-coastal
UKF13	0	non-coastal
UKF14	0	non-coastal
UKF15	2	coastal (>= 50% of population living within 50km of the coastline)
UKF16	0	non-coastal
UKF21	0	non-coastal
UKF22	0	non-coastal
UKF24	0	non-coastal
UKF25	0	non-coastal
UKF30	1	coastal (on coast)
UKG11	2	coastal (>= 50% of population living within 50km of the coastline)
UKG12	0	non-coastal
UKG13	0	non-coastal
UKG21	0	non-coastal
UKG22	0	non-coastal
UKG23	0	non-coastal
UKG24	0	non-coastal
UKG31	0	non-coastal
UKG32	0	non-coastal
UKG33	0	non-coastal
UKG36	0	non-coastal
UKG37	0	non-coastal
UKG38	0	non-coastal
UKG39	0	non-coastal
UKH11	2	coastal (>= 50% of population living within 50km of the coastline)
UKH12	0	non-coastal
UKH14	1	coastal (on coast)
UKH15	1	coastal (on coast)
UKH16	1	coastal (on coast)
UKH17	2	coastal (>= 50% of population living within 50km of the coastline)
UKH21	2	coastal (>= 50% of population living within 50km of the coastline)
UKH23	2	coastal (>= 50% of population living within 50km of the coastline)
UKH24	0	non-coastal
UKH25	0	non-coastal
UKH31	1	coastal (on coast)
UKH32	1	coastal (on coast)
UKH34	1	coastal (on coast)
UKH35	2	coastal (>= 50% of population living within 50km of the coastline)
UKH36	1	coastal (on coast)
UKH37	1	coastal (on coast)
UKI31	1	coastal (on coast)
UKI32	1	coastal (on coast)
UKI33	1	coastal (on coast)
UKI34	1	coastal (on coast)
UKI41	1	coastal (on coast)
UKI42	1	coastal (on coast)
UKI43	2	coastal (>= 50% of population living within 50km of the coastline)
UKI44	1	coastal (on coast)
UKI45	1	coastal (on coast)
UKI51	1	coastal (on coast)
UKI52	1	coastal (on coast)
UKI53	2	coastal (>= 50% of population living within 50km of the coastline)
UKI54	2	coastal (>= 50% of population living within 50km of the coastline)
UKI61	2	coastal (>= 50% of population living within 50km of the coastline)
UKI62	2	coastal (>= 50% of population living within 50km of the coastline)
UKI63	2	coastal (>= 50% of population living within 50km of the coastline)
UKI71	2	coastal (>= 50% of population living within 50km of the coastline)
UKI72	2	coastal (>= 50% of population living within 50km of the coastline)
UKI73	2	coastal (>= 50% of population living within 50km of the coastline)
UKI74	2	coastal (>= 50% of population living within 50km of the coastline)
UKI75	1	coastal (on coast)
UKJ11	2	coastal (>= 50% of population living within 50km of the coastline)
UKJ12	0	non-coastal
UKJ13	2	coastal (>= 50% of population living within 50km of the coastline)
UKJ14	0	non-coastal
UKJ21	1	coastal (on coast)
UKJ22	1	coastal (on coast)
UKJ25	2	coastal (>= 50% of population living within 50km of the coastline)
UKJ26	2	coastal (>= 50% of population living within 50km of the coastline)
UKJ27	1	coastal (on coast)
UKJ28	2	coastal (>= 50% of population living within 50km of the coastline)
UKJ31	1	coastal (on coast)
UKJ32	1	coastal (on coast)
UKJ34	1	coastal (on coast)
UKJ35	1	coastal (on coast)
UKJ36	1	coastal (on coast)
UKJ37	2	coastal (>= 50% of population living within 50km of the coastline)
UKJ41	1	coastal (on coast)
UKJ43	1	coastal (on coast)
UKJ44	1	coastal (on coast)
UKJ45	2	coastal (>= 50% of population living within 50km of the coastline)
UKJ46	1	coastal (on coast)
UKK11	1	coastal (on coast)
UKK12	1	coastal (on coast)
UKK13	1	coastal (on coast)
UKK14	2	coastal (>= 50% of population living within 50km of the coastline)
UKK15	2	coastal (>= 50% of population living within 50km of the coastline)
UKK23	1	coastal (on coast)
UKK24	1	coastal (on coast)
UKK25	1	coastal (on coast)
UKK30	1	coastal (on coast)
UKK41	1	coastal (on coast)
UKK42	1	coastal (on coast)
UKK43	1	coastal (on coast)
UKL11	1	coastal (on coast)
UKL12	1	coastal (on coast)
UKL13	1	coastal (on coast)
UKL14	1	coastal (on coast)
UKL15	2	coastal (>= 50% of population living within 50km of the coastline)
UKL16	2	coastal (>= 50% of population living within 50km of the coastline)
UKL17	1	coastal (on coast)
UKL18	1	coastal (on coast)
UKL21	1	coastal (on coast)
UKL22	1	coastal (on coast)
UKL23	1	coastal (on coast)
UKL24	2	coastal (>= 50% of population living within 50km of the coastline)
UKM50	1	coastal (on coast)
UKM61	1	coastal (on coast)
UKM62	1	coastal (on coast)
UKM63	1	coastal (on coast)
UKM64	1	coastal (on coast)
UKM65	1	coastal (on coast)
UKM66	1	coastal (on coast)
UKM71	1	coastal (on coast)
UKM72	1	coastal (on coast)
UKM73	1	coastal (on coast)
UKM75	1	coastal (on coast)
UKM76	1	coastal (on coast)
UKM77	1	coastal (on coast)
UKM78	1	coastal (on coast)
UKM81	1	coastal (on coast)
UKM82	1	coastal (on coast)
UKM83	1	coastal (on coast)
UKM84	2	coastal (>= 50% of population living within 50km of the coastline)
UKM91	1	coastal (on coast)
UKM92	1	coastal (on coast)
UKM93	1	coastal (on coast)
UKM94	1	coastal (on coast)
UKM95	2	coastal (>= 50% of population living within 50km of the coastline)
UKN06	1	coastal (on coast)
UKN07	2	coastal (>= 50% of population living within 50km of the coastline)
UKN08	1	coastal (on coast)
UKN09	1	coastal (on coast)
UKN0A	1	coastal (on coast)
UKN0B	2	coastal (>= 50% of population living within 50km of the coastline)
UKN0C	1	coastal (on coast)
UKN0D	1	coastal (on coast)
UKN0E	2	coastal (>= 50% of population living within 50km of the coastline)
UKN0F	1	coastal (on coast)
UKN0G	2	coastal (>= 50% of population living within 50km of the coastline)

[truncated: 4 more sheets: Mountain regions, Border regions, Island regions, Urban-rural remoteness]
